# Supplementary material for: Fertility is a key predictor of the double burden of malnutrition among women of child-bearing age in sub-Saharan Africa
Source: PubMed Central journal article supplement (PMC7568927; doi:10.7189/jogh.10.020423), 2020-12
Supplement: jogh-10-020423-s001.pdf [file jogh-10-020423-s001.pdf]

## ONLINE SUPPLEMENTARY DOCUMENT

### Appendix S1: Random forest Box plots for country level Analysis (Figures S1-S3).

1. The box plots present a summary of country-level predictors for underweight (BMI <18.5 kg/m<sup>2</sup>), overweight (BMI 25.0 – 29.9 kg/m<sup>2</sup>) and obesity (BMI > 29.9 kg/m<sup>2</sup>) prevalence.
2. Variables to the right of the dashed line (absolute value of the lowest ranking variable) are the most influential predictors for underweight, overweight and obesity prevalence, ranked based on the relative importance score.
3. Presented alongside the figure caption is the root mean square error (RMSE), used as goodness of fit statistic for the model.
4. Variable Definitions:
  - a. **GDP:** Gross domestic product divided by midyear population (Current US\$).
  - b. **Urbanization:** Proportion of the total population living in urban areas (% of the total).
  - c. **GINI Index (GINI Coefficient):** Measure of deviation of individual's income from a perfectly equal distribution (0=Perfect Equality while 1=Perfect Inequality).
  - d. **Globalization (KOF Index of Globalization):** Measure of the degree of Globalization incorporating, the social, political, and economic dimensions.
  - e. **Fertility:** Average number of live births per woman until the end of her child-bearing years.
  - a. **Life Expectancy:** Average number of years a newborn female is expected to live if mortality patterns remain the same.

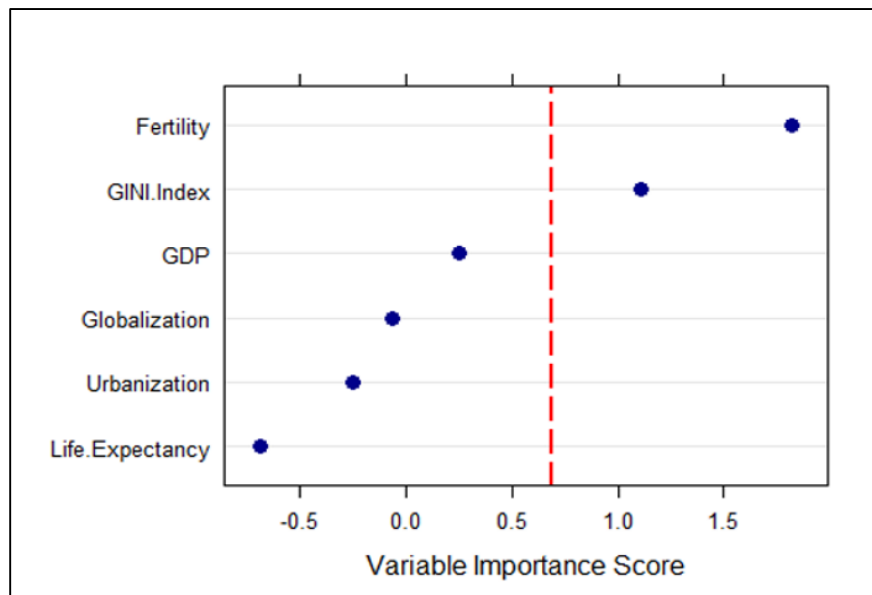

Figure S1: Predictors for underweight prevalence (RMSE = 5.6417).

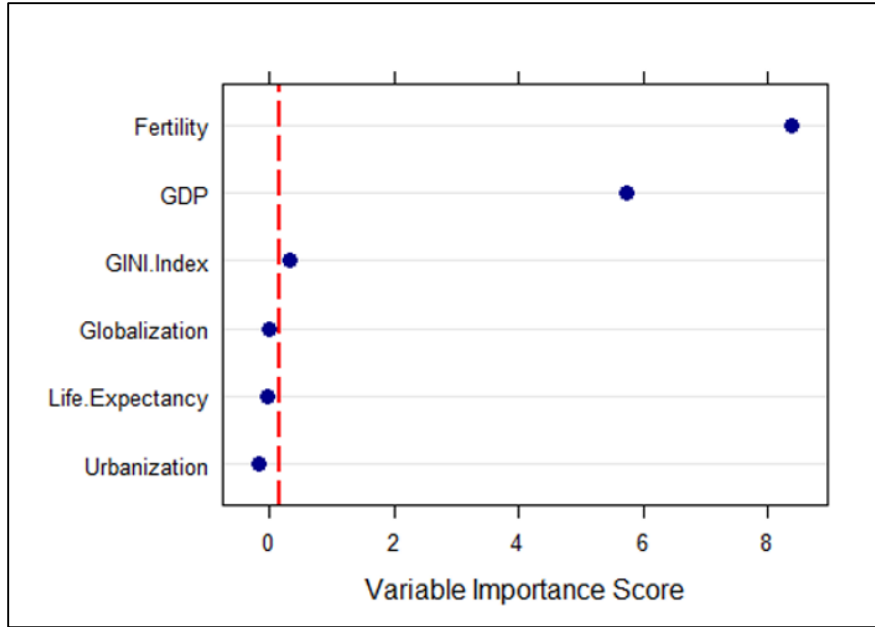

**Figure S2:** Predictors for overweight prevalence (RMSE=4.9637).

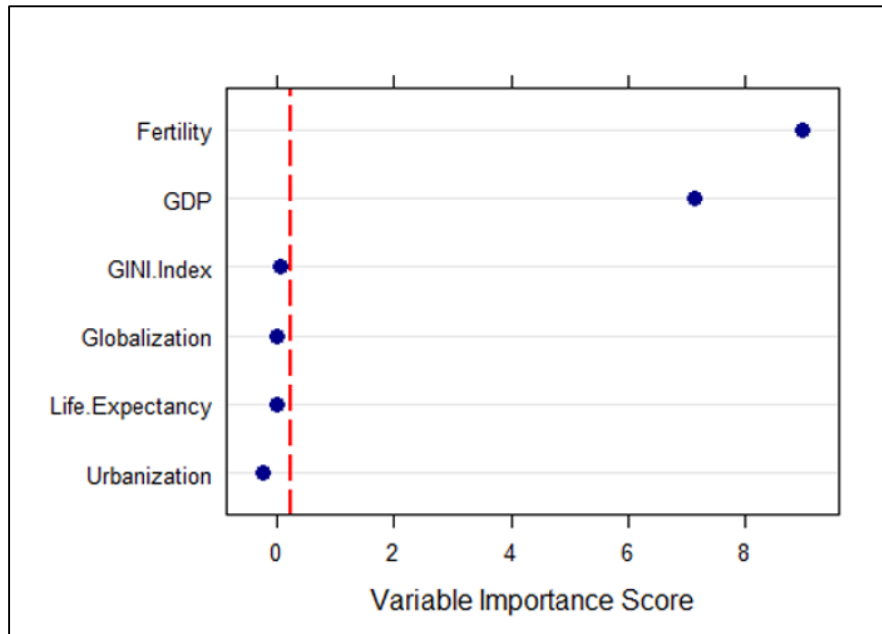

**Figure S3:** Predictors for obesity prevalence (RMSE = 4.2199).

**Appendix 2: Descriptive statistics for individual-level data for each country included in the study (Tables S1 – S34).**

**Table S1:** Descriptive statistics for the study population in Madagascar.

| <b>Variable</b>            | <b>Sample Size n (%)</b> |        |
|----------------------------|--------------------------|--------|
| <b>Total Sample Size</b>   | 7,379                    |        |
| <b>Nutritional status</b>  |                          |        |
| Underweight                | 1,985                    | (26.9) |
| Normal Weight              | 4,937                    | (66.9) |
| Overweight/Obesity         | 457                      | (6.2)  |
| <b>Age</b>                 |                          |        |
| 15-19                      | 1,682                    | (22.8) |
| 20-24                      | 1,092                    | (14.8) |
| 25-29                      | 1,159                    | (15.7) |
| 30-34                      | 1,018                    | (13.8) |
| 35-39                      | 893                      | (12.1) |
| 40-44                      | 834                      | (11.3) |
| 45-49                      | 701                      | (9.5)  |
| <b>Religion</b>            |                          |        |
| Catholics                  | 2,597                    | (35.2) |
| Other Christians           | 2,634                    | (35.7) |
| Islam                      | 44                       | (0.6)  |
| Traditionalist             | 162                      | (2.2)  |
| Others                     | 443                      | (6.0)  |
| No Religion                | 1,498                    | (20.3) |
| <b>Parity</b>              |                          |        |
| 0                          | 1,874                    | (25.4) |
| 1                          | 1,063                    | (14.4) |
| 2                          | 996                      | (13.5) |
| 3                          | 893                      | (12.1) |
| 4                          | 671                      | (9.1)  |
| 5                          | 576                      | (7.8)  |
| 6+                         | 1,306                    | (17.7) |
| <b>Marital Status</b>      |                          |        |
| Single                     | 1,468                    | (19.9) |
| Married                    | 4,929                    | (66.8) |
| Formerly Married           | 981                      | (13.3) |
| <b>Residential Setting</b> |                          |        |
| Rural                      | 6,088                    | (82.5) |
| Urban                      | 1,291                    | (17.5) |

| <b>Variable</b>                    | <b>Sample Size n (%)</b> |        |
|------------------------------------|--------------------------|--------|
| <b>Region</b>                      |                          |        |
| Analamanga                         | 1,299                    | (17.6) |
| Vakinankaratra                     | 649                      | (8.8)  |
| Itasy                              | 303                      | (4.1)  |
| Bongolava                          | 214                      | (2.9)  |
| Haute Matsiatra                    | 391                      | (5.3)  |
| Anamoroni'i mania                  | 251                      | (3.4)  |
| Vatovavy Fitovinany                | 362                      | (4.9)  |
| Ihorombe                           | 140                      | (1.9)  |
| Atsimo Atsinanana                  | 229                      | (3.1)  |
| Atsinanana                         | 472                      | (6.4)  |
| Analanjirifo                       | 369                      | (5.0)  |
| Alaotra Mangoro                    | 369                      | (5.0)  |
| Boeny                              | 258                      | (3.5)  |
| Sofia                              | 450                      | (6.1)  |
| Betsiboka                          | 103                      | (1.4)  |
| Melaky                             | 74                       | (1.0)  |
| Atsimo Andrefana                   | 354                      | (4.8)  |
| Androy                             | 170                      | (2.3)  |
| Anosy                              | 214                      | (2.9)  |
| Menabe                             | 170                      | (2.3)  |
| Diana                              | 199                      | (2.7)  |
| Sava                               | 339                      | (4.6)  |
| <b>Level of Education</b>          |                          |        |
| No Education                       | 1,358                    | (18.4) |
| Primary                            | 3,594                    | (48.7) |
| Secondary                          | 2,251                    | (30.5) |
| Higher                             | 177                      | (2.4)  |
| <b>Wealth Quintile</b>             |                          |        |
| Poorest                            | 1,254                    | (17.0) |
| Poorer                             | 1,350                    | (18.3) |
| Middle                             | 1,350                    | (18.3) |
| Richer                             | 1,557                    | (21.1) |
| Richest                            | 1,867                    | (25.3) |
| <b>Occupation</b>                  |                          |        |
| Not Working                        | 1,173                    | (15.9) |
| Nonmanual                          | 1,011                    | (13.7) |
| Manual                             | 635                      | (8.6)  |
| Agricultural                       | 4,545                    | (61.6) |
| Others                             | 15                       | (0.2)  |
| <b>Media Exposure</b>              |                          |        |
| Not Exposed                        | 2,302                    | (31.2) |
| Exposed to one media source        | 2,885                    | (39.1) |
| Exposed to two media sources       | 1,181                    | (16.0) |
| Exposed to three media sources     | 1,011                    | (13.7) |
| <b>Hormonal Contraceptives use</b> |                          |        |
| No                                 | 5,726                    | (77.6) |
| Yes                                | 1,653                    | (22.4) |

**Table S2:** Descriptive statistics for the study population in Ethiopia.

| <b>Variable</b>            | <b>Sample Size n (%)</b> |        |
|----------------------------|--------------------------|--------|
| <b>Total Sample Size</b>   | 13,222                   | (100)  |
| <b>Nutritional status</b>  |                          |        |
| Underweight                | 2,988                    | (20.6) |
| Normal Weight              | 9,229                    | (69.8) |
| Overweight/Obesity         | 1,005                    | (7.6)  |
| <b>Age</b>                 |                          |        |
| 15-19                      | 3,015                    | (22.8) |
| 20-24                      | 2,182                    | (16.5) |
| 25-29                      | 2,367                    | (17.9) |
| 30-34                      | 1,904                    | (14.4) |
| 35-39                      | 1,626                    | (12.3) |
| 40-44                      | 1,164                    | (8.8)  |
| 45-49                      | 965                      | (7.3)  |
| <b>Ethnicity</b>           |                          |        |
| Amhara                     | 4,112                    | (31.1) |
| Affar                      | 79                       | (0.6)  |
| Guragie                    | 383                      | (2.9)  |
| Hadiye                     | 304                      | (2.3)  |
| Oromo                      | 4,350                    | (32.9) |
| Sidama                     | 542                      | (4.1)  |
| Somali                     | 331                      | (2.5)  |
| Tigray                     | 1,045                    | (7.9)  |
| Welaita                    | 410                      | (3.1)  |
| Others                     | 1,666                    | (12.6) |
| <b>Religion</b>            |                          |        |
| Catholic                   | 106                      | (0.8)  |
| Other Christians           | 9,070                    | (68.6) |
| Islam                      | 3,900                    | (29.5) |
| Others                     | 145                      | (1.1)  |
| <b>Parity</b>              |                          |        |
| 0                          | 4,535                    | (34.3) |
| 1                          | 1,454                    | (11.0) |
| 2                          | 1,283                    | (9.7)  |
| 3                          | 1,203                    | (9.1)  |
| 4                          | 1,018                    | (7.7)  |
| 5                          | 1,031                    | (7.8)  |
| 6+                         | 2,697                    | (20.4) |
| <b>Marital Status</b>      |                          |        |
| Single                     | 3,755                    | (28.4) |
| Married                    | 8,145                    | (61.6) |
| Formerly Married           | 1,322                    | (10.0) |
| <b>Residential Setting</b> |                          |        |
| Rural                      | 10,207                   | (77.2) |
| Urban                      | 3,015                    | (22.8) |

| <b>Variable</b>                    | <b>Sample Size n (%)</b> |        |
|------------------------------------|--------------------------|--------|
| <b>Region</b>                      |                          |        |
| Tigray                             | 978                      | (7.4)  |
| Afar                               | 106                      | (0.8)  |
| Amhara                             | 3,279                    | (24.8) |
| Oromia                             | 4,667                    | (35.3) |
| Somali                             | 344                      | (2.6)  |
| Benishangul                        | 132                      | (1.0)  |
| Snnpr                              | 2,763                    | (20.9) |
| Gambela                            | 40                       | (0.3)  |
| Harari                             | 26                       | (0.2)  |
| Addis Adaba                        | 820                      | (6.2)  |
| Dire Dawa                          | 66                       | (0.5)  |
| <b>Level of Education</b>          |                          |        |
| No Education                       | 6,241                    | (47.2) |
| Primary                            | 4,667                    | (35.3) |
| Secondary                          | 1,560                    | (11.8) |
| Higher                             | 754                      | (5.7)  |
| <b>Wealth Quintile</b>             |                          |        |
| Poorest                            | 2,129                    | (16.1) |
| Poorer                             | 2,274                    | (17.2) |
| Middle                             | 2,565                    | (19.4) |
| Richer                             | 2,671                    | (20.2) |
| Richest                            | 3,583                    | (27.1) |
| <b>Occupation</b>                  |                          |        |
| Not Working                        | 6,426                    | (48.6) |
| Nonmanual                          | 2,935                    | (22.2) |
| Manual                             | 740                      | (5.6)  |
| Agricultural                       | 2,790                    | (21.1) |
| Others                             | 331                      | (2.5)  |
| <b>Media Exposure</b>              |                          |        |
| Not Exposed                        | 7,351                    | (55.6) |
| Exposed to one media source        | 2,724                    | (20.6) |
| Exposed to two media sources       | 2,116                    | (16.0) |
| Exposed to three media sources     | 1,031                    | (7.8)  |
| <b>Hormonal Contraceptives use</b> |                          |        |
| No                                 | 9,824                    | (74.3) |
| Yes                                | 3,398                    | (25.7) |

**Table S3:** Descriptive statistics for the study population in Burundi.

| <b>Variable</b>            | <b>Sample Size n (%)</b> |        |
|----------------------------|--------------------------|--------|
| <b>Total Sample Size</b>   | 3,929                    | (100)  |
| <b>Nutritional status</b>  |                          |        |
| Underweight                | 636                      | (16.2) |
| Normal Weight              | 2,998                    | (76.3) |
| Overweight/Obesity         | 295                      | (7.5)  |
| <b>Age</b>                 |                          |        |
| 15-19                      | 1,096                    | (27.9) |
| 20-24                      | 699                      | (17.8) |
| 25-29                      | 617                      | (15.7) |
| 30-34                      | 416                      | (10.6) |
| 35-39                      | 416                      | (10.6) |
| 40-44                      | 334                      | (8.5)  |
| 45-49                      | 350                      | (8.9)  |
| <b>Religion</b>            |                          |        |
| Catholics                  | 2,428                    | (61.8) |
| Other Christians           | 1,320                    | (33.6) |
| Islam                      | 83                       | (2.1)  |
| Others                     | 98                       | (2.5)  |
| <b>Parity</b>              |                          |        |
| 0                          | 1,521                    | (38.7) |
| 1                          | 389                      | (9.9)  |
| 2                          | 369                      | (9.4)  |
| 3                          | 326                      | (8.3)  |
| 4                          | 283                      | (7.2)  |
| 5                          | 271                      | (6.9)  |
| 6+                         | 770                      | (19.6) |
| <b>Marital Status</b>      |                          |        |
| Single                     | 1,493                    | (38.0) |
| Married                    | 2,055                    | (52.3) |
| Formerly Married           | 381                      | (9.7)  |
| <b>Residential Setting</b> |                          |        |
| Rural                      | 3,509                    | (89.3) |
| Urban                      | 420                      | (10.7) |
| <b>Region</b>              |                          |        |
| Bujumbura                  | 287                      | (7.3)  |
| North                      | 1,163                    | (29.6) |
| Centre East                | 963                      | (24.5) |
| West                       | 648                      | (16.5) |
| South                      | 868                      | (22.1) |
| <b>Level of Education</b>  |                          |        |
| No Education               | 1,752                    | (44.6) |
| Primary                    | 1,654                    | (42.1) |
| Secondary                  | 491                      | (12.5) |
| Higher                     | 31                       | (0.8)  |
| <b>Wealth Quintile</b>     |                          |        |
| Poorest                    | 786                      | (20.0) |
| Poorer                     | 778                      | (19.8) |
| Middle                     | 758                      | (19.3) |
| Richer                     | 790                      | (20.1) |
| Richest                    | 817                      | (20.8) |

| <b>Variable</b>                    | <b>Sample Size n (%)</b> |        |
|------------------------------------|--------------------------|--------|
| <b>Occupation</b>                  |                          |        |
| Not Working                        | 805                      | (20.5) |
| Nonmanual                          | 251                      | (6.4)  |
| Agricultural                       | 2,833                    | (72.1) |
| Others                             | 39                       | (1.0)  |
| <b>Media Exposure</b>              |                          |        |
| Not Exposed                        | 723                      | (18.4) |
| Exposed to one media source        | 2,090                    | (53.2) |
| Exposed to two media sources       | 860                      | (21.9) |
| Exposed to three media sources     | 255                      | (6.5)  |
| <b>Hormonal Contraceptives use</b> |                          |        |
| No                                 | 3,564                    | (90.7) |
| Yes                                | 365                      | (9.3)  |



**Table S4:** Descriptive statistics for the study population in Burkina Faso.

| <b>Variable</b>            | <b>Sample Size n (%)</b> |        |
|----------------------------|--------------------------|--------|
| <b>Total Sample Size</b>   | 7,212                    | (100)  |
| <b>Nutritional status</b>  |                          |        |
| Underweight                | 1,139                    | (15.8) |
| Normal Weight              | 5,265                    | (73.0) |
| Overweight/Obesity         | 808                      | (11.2) |
| <b>Age</b>                 |                          |        |
| 15-19                      | 1,500                    | (20.8) |
| 20-24                      | 1,298                    | (18.0) |
| 25-29                      | 1,161                    | (16.1) |
| 30-34                      | 1,067                    | (14.8) |
| 35-39                      | 858                      | (11.9) |
| 40-44                      | 692                      | (9.6)  |
| 45-49                      | 635                      | (8.8)  |
| <b>Ethnicity</b>           |                          |        |
| Bobo                       | 368                      | (5.1)  |
| Fulfuldé / Peul            | 534                      | (7.4)  |
| Gourmantché                | 454                      | (6.3)  |
| Gourouns                   | 325                      | (4.5)  |
| Lobi                       | 173                      | (2.4)  |
| Mossi                      | 3,765                    | (52.2) |
| Sénoufo                    | 346                      | (4.8)  |
| Dagara                     | 195                      | (2.7)  |
| Bissa                      | 303                      | (4.2)  |
| Others                     | 750                      | (10.4) |
| <b>Religion</b>            |                          |        |
| Catholic                   | 1,709                    | (23.7) |
| Other Christians           | 512                      | (7.1)  |
| Islam                      | 4,421                    | (61.3) |
| Traditionalists            | 512                      | (7.1)  |
| No Religion                | 58                       | (0.8)  |
| <b>Parity</b>              |                          |        |
| 0                          | 1,753                    | (24.3) |
| 1                          | 801                      | (11.1) |
| 2                          | 801                      | (11.1) |
| 3                          | 793                      | (11.0) |
| 4                          | 728                      | (10.1) |
| 5                          | 635                      | (8.8)  |
| 6+                         | 1,702                    | (23.6) |
| <b>Marital Status</b>      |                          |        |
| Single                     | 1,457                    | (20.2) |
| Married                    | 5,496                    | (76.2) |
| Formerly Married           | 260                      | (3.6)  |
| <b>Residential Setting</b> |                          |        |
| Rural                      | 5,171                    | (71.7) |
| Urban                      | 2,041                    | (28.3) |

| <b>Variable</b>                    | <b>Sample Size n (%)</b> |        |
|------------------------------------|--------------------------|--------|
| <b>Region</b>                      |                          |        |
| Boucle de mouhoun                  | 772                      | (10.7) |
| Cascades                           | 274                      | (3.8)  |
| Centre                             | 1,118                    | (15.5) |
| Centre-Est                         | 534                      | (7.4)  |
| Centre-Nord                        | 483                      | (6.7)  |
| Centre-Ouest                       | 555                      | (7.7)  |
| Centre-Sud                         | 317                      | (4.4)  |
| Est                                | 584                      | (8.1)  |
| Hauts Basins                       | 916                      | (12.7) |
| Nord                               | 512                      | (7.1)  |
| Plateau Central                    | 339                      | (4.7)  |
| Sahel                              | 498                      | (6.9)  |
| Sud-Ouest                          | 310                      | (4.3)  |
| <b>Level of Education</b>          |                          |        |
| No Education                       | 5,243                    | (72.7) |
| Primary                            | 1,024                    | (14.2) |
| Secondary                          | 865                      | (12.0) |
| Higher                             | 79                       | (1.1)  |
| <b>Wealth Quintile</b>             |                          |        |
| Poorest                            | 1,298                    | (18.0) |
| Poorer                             | 1,320                    | (18.3) |
| Middle                             | 1,320                    | (18.3) |
| Richer                             | 1,414                    | (19.6) |
| Richest                            | 1,861                    | (25.8) |
| <b>Occupation</b>                  |                          |        |
| Not Working                        | 1,522                    | (21.1) |
| Nonmanual                          | 1,760                    | (24.4) |
| Manual                             | 4,76                     | (6.6)  |
| Agricultural                       | 3,296                    | (45.7) |
| Others                             | 1,59                     | (2.2)  |
| <b>Media Exposure</b>              |                          |        |
| Not Exposed                        | 1,846                    | (25.6) |
| Exposed to one media source        | 3,152                    | (43.7) |
| Exposed to two media sources       | 1,630                    | (22.6) |
| Exposed to three media sources     | 584                      | (8.1)  |
| <b>Hormonal Contraceptives use</b> |                          |        |
| No                                 | 6,354                    | (88.1) |
| Yes                                | 858                      | (11.9) |

**Table S5:** Descriptive statistics for the study population in Chad.

| <b>Variable</b>                                    | <b>Sample Size n (%)</b> |        |
|----------------------------------------------------|--------------------------|--------|
| <b>Total Sample Size</b>                           | 8,873                    | (100)  |
| <b>Nutritional status</b>                          |                          |        |
| Underweight                                        | 1,730                    | (19.5) |
| Normal Weight                                      | 6,131                    | (69.1) |
| Overweight/Obesity                                 | 1,012                    | (11.4) |
| <b>Age</b>                                         |                          |        |
| 15-19                                              | 2,032                    | (22.9) |
| 20-24                                              | 1,366                    | (15.4) |
| 25-29                                              | 1,544                    | (17.4) |
| 30-34                                              | 1,224                    | (13.8) |
| 35-39                                              | 1,065                    | (12.0) |
| 40-44                                              | 816                      | (9.2)  |
| 45-49                                              | 825                      | (9.3)  |
| <b>Ethnicity</b>                                   |                          |        |
| Toupouri/Kéra                                      | 186                      | (2.1)  |
| Gorane                                             | 515                      | (5.8)  |
| Arab                                               | 816                      | (9.2)  |
| Baguirmi/Barma                                     | 89                       | (1.0)  |
| Kanembou/Bornou/Boudouma                           | 896                      | (10.1) |
| Boulala/Médégo/Kouka                               | 328                      | (3.7)  |
| Ouadaï/Maba/Massalit/Mimi                          | 710                      | (8.0)  |
| Zaghawa/Bideyat/Kobé                               | 106                      | (1.2)  |
| Dadajo/Kibet/Mouro                                 | 204                      | (2.3)  |
| Bidio/Migami/Kenga/Dangléat                        | 213                      | (2.4)  |
| Moundang                                           | 248                      | (2.8)  |
| Massa/Mousseye/Mousgoume                           | 444                      | (5.0)  |
| Sara (Ngambaye/Sara Madjin-<br>Peul/Foulbé/Bodoré) | 2,839                    | (32.0) |
| Tama/Assongori/Mararit                             | 142                      | (1.6)  |
| Gabri/Kabalaye/Nangtchéré/<br>Soumraye             | 98                       | (1.1)  |
| Marba/Lélé/Mesmé                                   | 160                      | (1.8)  |
| Karo/Zimé/Pévé                                     | 328                      | (3.7)  |
| Others                                             | 115                      | (1.3)  |
|                                                    | 435                      | (4.9)  |
| <b>Religion</b>                                    |                          |        |
| Catholic                                           | 1,872                    | (21.1) |
| Other Christians                                   | 2,227                    | (25.1) |
| Islam                                              | 4,507                    | (50.8) |
| Traditionalists                                    | 27                       | (0.3)  |
| No Religion                                        | 240                      | (2.7)  |
| <b>Parity</b>                                      |                          |        |
| 0                                                  | 1,917                    | (21.6) |
| 1                                                  | 852                      | (9.6)  |
| 2                                                  | 790                      | (8.9)  |
| 3                                                  | 843                      | (9.5)  |
| 4                                                  | 816                      | (9.2)  |
| 5                                                  | 736                      | (8.3)  |
| 6+                                                 | 2,919                    | (32.9) |
| <b>Marital Status</b>                              |                          |        |
| Single                                             | 1,686                    | (19.0) |
| Married                                            | 6,309                    | (71.1) |
| Formerly Married                                   | 878                      | (9.9)  |

| <b>Variable</b>                    | <b>Sample Size n (%)</b> |        |
|------------------------------------|--------------------------|--------|
| <b>Residential Setting</b>         |                          |        |
| Rural                              | 6,752                    | (76.1) |
| Urban                              | 2,121                    | (23.9) |
| <b>Region</b>                      |                          |        |
| Batha                              | 319                      | (3.6)  |
| Borkou, Tibesti                    | 44                       | (0.5)  |
| Chari Baguirmi                     | 355                      | (4.0)  |
| Guéra                              | 453                      | (5.1)  |
| Hadjer-Lamis                       | 586                      | (6.6)  |
| Kanem                              | 346                      | (3.9)  |
| Lac                                | 506                      | (5.7)  |
| Logone Occidental                  | 612                      | (6.9)  |
| Logone Oriental                    | 896                      | (10.1) |
| Mandoul                            | 621                      | (7.0)  |
| Mayo Kebbi Est                     | 665                      | (7.5)  |
| Mayo Kebbi Ouest                   | 479                      | (5.4)  |
| Moyen Chari                        | 506                      | (5.7)  |
| Ouaddaï                            | 479                      | (5.4)  |
| Salamat                            | 142                      | (1.6)  |
| Tandjilé                           | 532                      | (6.0)  |
| Wadi Fira                          | 240                      | (2.7)  |
| N'Djaména                          | 799                      | (9.0)  |
| Barh El Gazal                      | 115                      | (1.3)  |
| Ennedi Est, Ennedi Ouest           | 44                       | (0.5)  |
| Sila                               | 133                      | (1.5)  |
| <b>Level of Education</b>          |                          |        |
| No Education                       | 5,448                    | (61.4) |
| Primary                            | 2,067                    | (23.3) |
| Secondary                          | 1,278                    | (14.4) |
| Higher                             | 80                       | (0.9)  |
| <b>Wealth Quintile</b>             |                          |        |
| Poorest                            | 1,757                    | (19.8) |
| Poorer                             | 1,677                    | (18.9) |
| Middle                             | 1,712                    | (19.3) |
| Richer                             | 1,810                    | (20.4) |
| Richest                            | 1,917                    | (21.6) |
| <b>Occupation</b>                  |                          |        |
| Not Working                        | 4,321                    | (48.7) |
| Nonmanual                          | 3,106                    | (35.0) |
| Manual                             | 115                      | (1.3)  |
| Agricultural                       | 1,269                    | (14.3) |
| Others                             | 62                       | (0.7)  |
| <b>Media Exposure</b>              |                          |        |
| Not Exposed                        | 6,273                    | (70.7) |
| Exposed to one media source        | 1,331                    | (15.0) |
| Exposed to two media sources       | 772                      | (8.7)  |
| Exposed to three media sources     | 497                      | (5.6)  |
| <b>Hormonal Contraceptives use</b> |                          |        |
| No                                 | 8,580                    | (96.7) |
| Yes                                | 293                      | (3.3)  |

**Table S6:** Descriptive statistics for the study population in Democratic Republic of Congo.

| <b>Variable</b>            | <b>Sample Size n (%)</b> |        |
|----------------------------|--------------------------|--------|
| <b>Total Sample Size</b>   | 7,655                    | (100)  |
| <b>Nutritional status</b>  |                          |        |
| Underweight                | 1,125                    | (14.7) |
| Normal Weight              | 5,305                    | (69.3) |
| Overweight/Obesity         | 1,225                    | (16.0) |
| <b>Age</b>                 |                          |        |
| 15-19                      | 1,782                    | (23.3) |
| 20-24                      | 1,323                    | (17.3) |
| 25-29                      | 1,301                    | (17.0) |
| 30-34                      | 1,008                    | (13.2) |
| 35-39                      | 900                      | (11.8) |
| 40-44                      | 733                      | (9.6)  |
| 45-49                      | 608                      | (7.9)  |
| <b>Ethnicity</b>           |                          |        |
| Bakongo Nord & Sud         | 710                      | (9.3)  |
| Bas Kasai et Kwilu-Kwango  | 1,331                    | (17.4) |
| Cuvette central            | 707                      | (9.2)  |
| Ubangi et Itimbiri         | 854                      | (11.2) |
| Uele Lac Albert            | 559                      | (7.3)  |
| Basele-K, Man. et Kivu     | 1,509                    | (19.7) |
| Kasai, Katanga, Tanganyika | 1,884                    | (24.6) |
| Others                     | 100                      | (1.3)  |
| <b>Religion</b>            |                          |        |
| Catholic                   | 2,339                    | (30.6) |
| Other Christians           | 5,088                    | (66.5) |
| Islam                      | 73                       | (1.0)  |
| Traditionalists            | 41                       | (0.5)  |
| No Religion                | 115                      | (1.5)  |
| <b>Parity</b>              |                          |        |
| 0                          | 2,162                    | (28.2) |
| 1                          | 987                      | (12.9) |
| 2                          | 805                      | (10.5) |
| 3                          | 684                      | (8.9)  |
| 4                          | 673                      | (8.8)  |
| 5                          | 611                      | (8.0)  |
| 6+                         | 1,733                    | (22.6) |
| <b>Marital Status</b>      |                          |        |
| Single                     | 2,287                    | (29.9) |
| Married                    | 4,488                    | (58.6) |
| Formerly Married           | 880                      | (11.5) |
| <b>Residential Setting</b> |                          |        |
| Rural                      | 4,749                    | (62.0) |
| Urban                      | 2,905                    | (38.0) |

| <b>Variable</b>                    | <b>Sample Size n (%)</b> |        |
|------------------------------------|--------------------------|--------|
| <b>Region</b>                      |                          |        |
| Kinshasa                           | 934                      | (12.2) |
| Bandundu                           | 1,238                    | (16.2) |
| Bas-Congo                          | 374                      | (4.9)  |
| Equateur                           | 987                      | (12.9) |
| Kasai-Occidental                   | 480                      | (6.3)  |
| Kasai-Oriental                     | 781                      | (10.2) |
| Katanga                            | 682                      | (8.9)  |
| Maniema                            | 234                      | (3.1)  |
| Nord-Kivu                          | 701                      | (9.2)  |
| Oriental                           | 726                      | (9.5)  |
| Sud-Kivu                           | 517                      | (6.8)  |
| <b>Level of Education</b>          |                          |        |
| No Education                       | 1,210                    | (15.8) |
| Primary                            | 2,771                    | (36.2) |
| Secondary                          | 3,372                    | (44.1) |
| Higher                             | 302                      | (4.0)  |
| <b>Wealth Quintile</b>             |                          |        |
| Poorest                            | 1,409                    | (18.4) |
| Poorer                             | 1,424                    | (18.6) |
| Middle                             | 1,472                    | (19.2) |
| Richer                             | 1,484                    | (19.4) |
| Richest                            | 1,866                    | (24.4) |
| <b>Occupation</b>                  |                          |        |
| Not Working                        | 2,169                    | (28.3) |
| Nonmanual                          | 2,307                    | (30.1) |
| Manual                             | 27                       | (0.4)  |
| Agricultural                       | 3,152                    | (41.2) |
| <b>Media Exposure</b>              |                          |        |
| Not Exposed                        | 3,841                    | (50.2) |
| Exposed to one media source        | 1,924                    | (25.1) |
| Exposed to two media sources       | 1,357                    | (17.7) |
| Exposed to three media sources     | 534                      | (7.0)  |
| <b>Hormonal Contraceptives use</b> |                          |        |
| No                                 | 7,462                    | (97.5) |
| Yes                                | 193                      | (2.5)  |

**Table S7:** Descriptive statistics for the study population in Niger.

| <b>Variable</b>            | <b>Sample Size n (%)</b> |        |
|----------------------------|--------------------------|--------|
| <b>Total Sample Size</b>   | 4,104                    | (100)  |
| <b>Nutritional status</b>  |                          |        |
| Underweight                | 648                      | (15.8) |
| Normal Weight              | 2,733                    | (66.6) |
| Overweight/Obesity         | 722                      | (17.6) |
| <b>Age</b>                 |                          |        |
| 15-19                      | 718                      | (17.5) |
| 20-24                      | 669                      | (16.3) |
| 25-29                      | 743                      | (18.1) |
| 30-34                      | 657                      | (16.0) |
| 35-39                      | 550                      | (13.4) |
| 40-44                      | 402                      | (9.8)  |
| 45-49                      | 365                      | (8.9)  |
| <b>Parity</b>              |                          |        |
| 0                          | 702                      | (17.1) |
| 1                          | 394                      | (9.6)  |
| 2                          | 386                      | (9.4)  |
| 3                          | 402                      | (9.8)  |
| 4                          | 415                      | (10.1) |
| 5                          | 382                      | (9.3)  |
| 6+                         | 1,424                    | (34.7) |
| <b>Marital Status</b>      |                          |        |
| Single                     | 435                      | (10.6) |
| Married                    | 3,497                    | (85.2) |
| Formerly Married           | 172                      | (4.2)  |
| <b>Residential Setting</b> |                          |        |
| Rural                      | 3,316                    | (80.8) |
| Urban                      | 788                      | (19.2) |
| <b>Region</b>              |                          |        |
| Agadez                     | 86                       | (2.1)  |
| Diffa                      | 127                      | (3.1)  |
| Dosso                      | 570                      | (13.9) |
| Maradi                     | 841                      | (20.5) |
| Tahoua                     | 936                      | (22.8) |
| Tillaberi                  | 521                      | (12.7) |
| Zinder                     | 681                      | (16.6) |
| Niamey                     | 341                      | (8.3)  |
| <b>Level of Education</b>  |                          |        |
| No Education               | 3,279                    | (79.9) |
| Primary                    | 476                      | (11.6) |
| Secondary                  | 328                      | (8.0)  |
| Higher                     | 21                       | (0.5)  |
| <b>Wealth Quintile</b>     |                          |        |
| Poorest                    | 718                      | (17.5) |
| Poorer                     | 780                      | (19.0) |
| Middle                     | 817                      | (19.9) |
| Richer                     | 870                      | (21.2) |
| Richest                    | 919                      | (22.4) |
| <b>Occupation</b>          |                          |        |
| Not Working                | 2,963                    | (72.2) |
| Nonmanual                  | 923                      | (22.5) |
| Manual                     | 107                      | (2.6)  |
| Agricultural               | 111                      | (2.7)  |

| <b>Variable</b>                    | <b>Sample Size n (%)</b> |        |
|------------------------------------|--------------------------|--------|
| <b>Media Exposure</b>              |                          |        |
| Not Exposed                        | 1,395                    | (34.0) |
| Exposed to one media source        | 1,736                    | (42.3) |
| Exposed to two media sources       | 825                      | (20.1) |
| Exposed to three media sources     | 148                      | (3.6)  |
| <b>Hormonal Contraceptives use</b> |                          |        |
| No                                 | 3,739                    | (91.1) |
| Yes                                | 365                      | (8.9)  |



**Table S8:** Descriptive statistics for the study population in Mali.

| <b>Variable</b>            | <b>Sample Size n (%)</b> |        |
|----------------------------|--------------------------|--------|
| <b>Total Sample Size</b>   | 4,397                    | (100)  |
| <b>Nutritional status</b>  |                          |        |
| Underweight                | 510                      | (11.6) |
| Normal Weight              | 3,095                    | (70.4) |
| Overweight/Obesity         | 791                      | (18.0) |
| <b>Age</b>                 |                          |        |
| 15-19                      | 805                      | (18.3) |
| 20-24                      | 739                      | (16.8) |
| 25-29                      | 818                      | (18.6) |
| 30-34                      | 660                      | (15.0) |
| 35-39                      | 536                      | (12.2) |
| 40-44                      | 470                      | (10.7) |
| 45-49                      | 369                      | (8.4)  |
| <b>Ethnicity</b>           |                          |        |
| Bambara                    | 1,508                    | (34.3) |
| Malinke                    | 317                      | (7.2)  |
| Peulh                      | 651                      | (14.8) |
| Sarakole/Soninke/Marka     | 506                      | (11.5) |
| Dogon                      | 413                      | (9.4)  |
| Sénoufo/Minianka           | 466                      | (10.6) |
| Others                     | 536                      | (12.2) |
| <b>Religion</b>            |                          |        |
| Catholics                  | 119                      | (2.7)  |
| Other Christians           | 75                       | (1.7)  |
| Islam                      | 4,063                    | (92.4) |
| Traditionalist             | 31                       | (0.7)  |
| No Religion                | 110                      | (2.5)  |
| <b>Parity</b>              |                          |        |
| 0                          | 835                      | (19.0) |
| 1                          | 541                      | (12.3) |
| 2                          | 563                      | (12.8) |
| 3                          | 506                      | (11.5) |
| 4                          | 497                      | (11.3) |
| 5                          | 470                      | (10.7) |
| 6+                         | 985                      | (22.4) |
| <b>Marital Status</b>      |                          |        |
| Single                     | 682                      | (15.5) |
| Married                    | 3,619                    | (82.3) |
| Formerly Married           | 97                       | (2.2)  |
| <b>Residential Setting</b> |                          |        |
| Rural                      | 3,258                    | (74.1) |
| Urban                      | 1,139                    | (25.9) |
| <b>Region</b>              |                          |        |
| Kayes                      | 563                      | (12.8) |
| Sikasso                    | 923                      | (21.0) |
| Koulikoro                  | 1,011                    | (23.0) |
| Segou                      | 791                      | (18.0) |
| Mopti                      | 519                      | (11.8) |
| Bamako                     | 589                      | (13.4) |

| <b>Variable</b>                    | <b>Sample Size n (%)</b> |        |
|------------------------------------|--------------------------|--------|
| <b>Level of Education</b>          |                          |        |
| No Education                       | 3,280                    | (74.6) |
| Primary                            | 413                      | (9.4)  |
| Secondary                          | 642                      | (14.6) |
| Higher                             | 62                       | (1.4)  |
| <b>Wealth Quintile</b>             |                          |        |
| Poorest                            | 835                      | (19.0) |
| Poorer                             | 796                      | (18.1) |
| Middle                             | 831                      | (18.9) |
| Richer                             | 871                      | (19.8) |
| Richest                            | 1,064                    | (24.2) |
| <b>Occupation</b>                  |                          |        |
| Not Working                        | 2,220                    | (50.5) |
| Nonmanual                          | 893                      | (20.3) |
| Manual                             | 616                      | (14.0) |
| Agricultural                       | 668                      | (15.2) |
| <b>Media Exposure</b>              |                          |        |
| Not Exposed                        | 1,148                    | (26.1) |
| Exposed to one media source        | 1,161                    | (26.4) |
| Exposed to two media sources       | 1,732                    | (39.4) |
| Exposed to three media sources     | 356                      | (8.1)  |
| <b>Hormonal Contraceptives use</b> |                          |        |
| No                                 | 3,927                    | (89.3) |
| Yes                                | 470                      | (10.7) |

**Table S9:** Descriptive statistics for the study population in Gambia.

| <b>Variable</b>            | <b>Sample Size n (%)</b> |        |
|----------------------------|--------------------------|--------|
| <b>Total Sample Size</b>   | 3,886                    | (100)  |
| <b>Nutritional status</b>  |                          |        |
| Underweight                | 653                      | (16.8) |
| Normal Weight              | 2,359                    | (60.7) |
| Overweight/Obesity         | 874                      | (22.5) |
| <b>Age</b>                 |                          |        |
| 15-19                      | 940                      | (24.2) |
| 20-24                      | 797                      | (20.5) |
| 25-29                      | 665                      | (17.1) |
| 30-34                      | 567                      | (14.6) |
| 35-39                      | 389                      | (10.0) |
| 40-44                      | 299                      | (7.7)  |
| 45-49                      | 229                      | (5.9)  |
| <b>Ethnicity</b>           |                          |        |
| Mandinka/Jahanka           | 1,348                    | (34.7) |
| Wolof                      | 536                      | (13.8) |
| Jola/Karoninka             | 400                      | (10.3) |
| Fula/Tukulur/Lorobo        | 878                      | (22.6) |
| Serere                     | 109                      | (2.8)  |
| Serahuleh                  | 241                      | (6.2)  |
| Others                     | 190                      | (4.9)  |
| Non-Gambian                | 183                      | (4.7)  |
| <b>Religion</b>            |                          |        |
| Other Christians           | 144                      | (3.7)  |
| Islam                      | 3,742                    | (96.3) |
| <b>Parity</b>              |                          |        |
| 0                          | 1364                     | (35.1) |
| 1                          | 497                      | (12.8) |
| 2                          | 427                      | (11.0) |
| 3                          | 354                      | (9.1)  |
| 4                          | 303                      | (7.8)  |
| 5                          | 295                      | (7.6)  |
| 6+                         | 645                      | (16.6) |
| <b>Marital Status</b>      |                          |        |
| Single                     | 1,209                    | (31.1) |
| Married                    | 2,456                    | (63.2) |
| Formerly Married           | 222                      | (5.7)  |
| <b>Residential Setting</b> |                          |        |
| Rural                      | 1,714                    | (44.1) |
| Urban                      | 2,172                    | (55.9) |
| <b>Region</b>              |                          |        |
| Banjul                     | 85                       | (2.2)  |
| Kanifing                   | 902                      | (23.2) |
| Brikama                    | 1,310                    | (33.7) |
| Mansakonko                 | 190                      | (4.9)  |
| Kerewan                    | 443                      | (11.4) |
| Kuntaur                    | 194                      | (5.0)  |
| Janjanbureh                | 284                      | (7.3)  |
| Base                       | 478                      | (12.3) |

| <b>Variable</b>                    | <b>Sample Size n (%)</b> |        |
|------------------------------------|--------------------------|--------|
| <b>Level of Education</b>          |                          |        |
| No Education                       | 1,791                    | (46.1) |
| Primary                            | 521                      | (13.4) |
| Secondary                          | 1,368                    | (35.2) |
| Higher                             | 206                      | (5.3)  |
| <b>Wealth Quintile</b>             |                          |        |
| Poorest                            | 645                      | (16.6) |
| Poorer                             | 754                      | (19.4) |
| Middle                             | 653                      | (16.8) |
| Richer                             | 851                      | (21.9) |
| Richest                            | 983                      | (25.3) |
| <b>Occupation</b>                  |                          |        |
| Not Working                        | 1,892                    | (48.7) |
| Nonmanual                          | 1,053                    | (27.1) |
| Manual                             | 89                       | (2.3)  |
| Agricultural                       | 851                      | (21.9) |
| <b>Media Exposure</b>              |                          |        |
| Not Exposed                        | 330                      | (8.5)  |
| Exposed to one media source        | 968                      | (24.9) |
| Exposed to two media sources       | 1,943                    | (50.0) |
| Exposed to three media sources     | 645                      | (16.6) |
| <b>Hormonal Contraceptives use</b> |                          |        |
| No                                 | 3,633                    | (93.5) |
| Yes                                | 253                      | (6.5)  |

**Table S10:** Descriptive statistics for the study population in Uganda.

| <b>Variable</b>            | <b>Sample Size n (%)</b> |        |
|----------------------------|--------------------------|--------|
| <b>Total Sample Size</b>   | 2,308                    | (100)  |
| <b>Nutritional status</b>  |                          |        |
| Underweight                | 275                      | (11.9) |
| Normal Weight              | 1,606                    | (69.6) |
| Overweight/Obesity         | 429                      | (18.6) |
| <b>Age</b>                 |                          |        |
| 15-19                      | 586                      | (25.4) |
| 20-24                      | 372                      | (16.1) |
| 25-29                      | 406                      | (17.6) |
| 30-34                      | 275                      | (11.9) |
| 35-39                      | 291                      | (12.6) |
| 40-44                      | 194                      | (8.4)  |
| 45-49                      | 185                      | (8.0)  |
| <b>Ethnicity</b>           |                          |        |
| Baganda                    | 411                      | (17.8) |
| Banyankole                 | 226                      | (9.8)  |
| Basoga                     | 185                      | (8.0)  |
| Bakiga                     | 180                      | (7.8)  |
| Iteso                      | 164                      | (7.1)  |
| Others                     | 1142                     | (49.5) |
| <b>Religion</b>            |                          |        |
| Catholic                   | 972                      | (42.1) |
| Other Christians           | 1,022                    | (44.3) |
| Islam                      | 284                      | (12.3) |
| Others                     | 30                       | (1.3)  |
| <b>Parity</b>              |                          |        |
| 0                          | 655                      | (28.4) |
| 1                          | 201                      | (8.7)  |
| 2                          | 238                      | (10.3) |
| 3                          | 217                      | (9.4)  |
| 4                          | 231                      | (10.0) |
| 5                          | 173                      | (7.5)  |
| 6+                         | 593                      | (25.7) |
| <b>Marital Status</b>      |                          |        |
| Single                     | 676                      | (29.3) |
| Married                    | 1,322                    | (57.3) |
| Formerly Married           | 309                      | (13.4) |
| <b>Residential Setting</b> |                          |        |
| Rural                      | 1,807                    | (78.3) |
| Urban                      | 501                      | (21.7) |
| <b>Region</b>              |                          |        |
| Kampala                    | 242                      | (10.5) |
| Central 1                  | 245                      | (10.6) |
| Central 2                  | 231                      | (10.0) |
| East Central               | 219                      | (9.5)  |
| Eastern                    | 337                      | (14.6) |
| North                      | 192                      | (8.3)  |
| Karamoja                   | 65                       | (2.8)  |
| West-Nile                  | 138                      | (6.0)  |
| Western                    | 332                      | (14.4) |
| South West                 | 307                      | (13.3) |

| <b>Variable</b>                    | <b>Sample Size n (%)</b> |        |
|------------------------------------|--------------------------|--------|
| <b>Level of Education</b>          |                          |        |
| No Education                       | 270                      | (11.7) |
| Primary                            | 1,376                    | (59.6) |
| Secondary                          | 531                      | (23.0) |
| Higher                             | 132                      | (5.7)  |
| <b>Wealth Quintile</b>             |                          |        |
| Poorest                            | 379                      | (16.4) |
| Poorer                             | 383                      | (16.6) |
| Middle                             | 420                      | (18.2) |
| Richer                             | 503                      | (21.8) |
| Richest                            | 623                      | (27.0) |
| <b>Occupation</b>                  |                          |        |
| Not Working                        | 632                      | (27.4) |
| Nonmanual                          | 554                      | (24.0) |
| Agricultural                       | 1,122                    | (48.6) |
| <b>Media Exposure</b>              |                          |        |
| Not Exposed                        | 291                      | (12.6) |
| Exposed to one media source        | 1,013                    | (43.9) |
| Exposed to two media sources       | 619                      | (26.8) |
| Exposed to three media sources     | 385                      | (16.7) |
| <b>Hormonal Contraceptives use</b> |                          |        |
| No                                 | 1,872                    | (81.1) |
| Yes                                | 436                      | (18.9) |

**Table S11:** Descriptive statistics for the study population in Guinea.

| <b>Variable</b>            | <b>Sample Size n (%)</b> |        |
|----------------------------|--------------------------|--------|
| <b>Total Sample Size</b>   | 4,038                    | (100)  |
| <b>Nutritional status</b>  |                          |        |
| Underweight                | 497                      | (12.3) |
| Normal Weight              | 2,758                    | (68.3) |
| Overweight/Obesity         | 783                      | (19.4) |
| <b>Age</b>                 |                          |        |
| 15-19                      | 969                      | (24.0) |
| 20-24                      | 690                      | (17.1) |
| 25-29                      | 630                      | (15.6) |
| 30-34                      | 509                      | (12.6) |
| 35-39                      | 501                      | (12.4) |
| 40-44                      | 396                      | (9.8)  |
| 45-49                      | 343                      | (8.5)  |
| <b>Ethnicity</b>           |                          |        |
| Soussou                    | 820                      | (20.3) |
| Peulh                      | 1,300                    | (32.2) |
| Malinké                    | 1,244                    | (30.8) |
| Kissi                      | 190                      | (4.7)  |
| Toma                       | 113                      | (2.8)  |
| Guerzé                     | 258                      | (6.4)  |
| Other                      | 113                      | (2.8)  |
| <b>Religion</b>            |                          |        |
| Other Christians           | 371                      | (9.2)  |
| Islam                      | 3,477                    | (86.1) |
| No Religion                | 190                      | (4.7)  |
| <b>Parity</b>              |                          |        |
| 0                          | 1,094                    | (27.1) |
| 1                          | 553                      | (13.7) |
| 2                          | 472                      | (11.7) |
| 3                          | 359                      | (8.9)  |
| 4                          | 384                      | (9.5)  |
| 5                          | 363                      | (9.0)  |
| 6+                         | 812                      | (20.1) |
| <b>Marital Status</b>      |                          |        |
| Single                     | 1,078                    | (26.7) |
| Married                    | 2,774                    | (68.7) |
| Formerly Married           | 186                      | (4.6)  |
| <b>Residential Setting</b> |                          |        |
| Rural                      | 2,556                    | (63.3) |
| Urban                      | 1,482                    | (36.7) |
| <b>Region</b>              |                          |        |
| Boké                       | 412                      | (10.2) |
| Conakry                    | 852                      | (21.1) |
| Faranah                    | 335                      | (8.3)  |
| Kankan                     | 521                      | (12.9) |
| Kindia                     | 557                      | (13.8) |
| Labé                       | 363                      | (9.0)  |
| Mamou                      | 258                      | (6.4)  |
| N'Zérékoré                 | 739                      | (18.3) |

| <b>Variable</b>                    | <b>Sample Size n (%)</b> |        |
|------------------------------------|--------------------------|--------|
| <b>Level of Education</b>          |                          |        |
| No Education                       | 2,625                    | (65.0) |
| Primary                            | 573                      | (14.2) |
| Secondary                          | 711                      | (17.6) |
| Higher                             | 129                      | (3.2)  |
| <b>Wealth Quintile</b>             |                          |        |
| Poorest                            | 690                      | (17.1) |
| Poorer                             | 763                      | (18.9) |
| Middle                             | 755                      | (18.7) |
| Richer                             | 848                      | (21.0) |
| Richest                            | 981                      | (24.3) |
| <b>Occupation</b>                  |                          |        |
| Not Working                        | 1,070                    | (26.5) |
| Nonmanual                          | 1,175                    | (29.1) |
| Manual                             | 258                      | (6.4)  |
| Agricultural                       | 1,534                    | (38.0) |
| <b>Media Exposure</b>              |                          |        |
| Not Exposed                        | 1,175                    | (29.1) |
| Exposed to one media source        | 1,195                    | (29.6) |
| Exposed to two media sources       | 1,333                    | (33.0) |
| Exposed to three media sources     | 335                      | (8.3)  |
| <b>Hormonal Contraceptives use</b> |                          |        |
| No                                 | 3,881                    | (96.1) |
| Yes                                | 157                      | (3.9)  |



**Table S12:** Descriptive statistics for the study population in Senegal.

| <b>Variable</b>            | <b>Sample Size n (%)</b> |        |
|----------------------------|--------------------------|--------|
| <b>Total Sample Size</b>   | 5,020                    | (100)  |
| <b>Nutritional status</b>  |                          |        |
| Underweight                | 1,109                    | (22.1) |
| Normal Weight              | 2,841                    | (56.6) |
| Overweight/Obesity         | 1,069                    | (21.3) |
| <b>Age</b>                 |                          |        |
| 15-19                      | 1,195                    | (23.8) |
| 20-24                      | 974                      | (19.4) |
| 25-29                      | 813                      | (16.2) |
| 30-34                      | 648                      | (12.9) |
| 35-39                      | 532                      | (10.6) |
| 40-44                      | 502                      | (10.0) |
| 45-49                      | 356                      | (7.1)  |
| <b>Ethnicity</b>           |                          |        |
| Wolof                      | 2,018                    | (40.2) |
| Poular                     | 1,205                    | (24.0) |
| Serer                      | 738                      | (14.7) |
| Mandingue                  | 186                      | (3.7)  |
| Diola                      | 216                      | (4.3)  |
| Soninke                    | 141                      | (2.8)  |
| Not a Senegalese           | 126                      | (2.5)  |
| Others                     | 392                      | (7.8)  |
| <b>Religion</b>            |                          |        |
| Islam                      | 4,774                    | (95.1) |
| Other                      | 246                      | (4.9)  |
| <b>Parity</b>              |                          |        |
| 0                          | 1,888                    | (37.6) |
| 1                          | 633                      | (12.6) |
| 2                          | 527                      | (10.5) |
| 3                          | 427                      | (8.5)  |
| 4                          | 366                      | (7.3)  |
| 5                          | 326                      | (6.5)  |
| 6+                         | 853                      | (17.0) |
| <b>Marital Status</b>      |                          |        |
| Single                     | 1,642                    | (32.7) |
| Married                    | 3,132                    | (62.4) |
| Formerly Married           | 246                      | (4.9)  |
| <b>Residential Setting</b> |                          |        |
| Rural                      | 2,480                    | (49.4) |
| Urban                      | 2,540                    | (50.6) |

| <b>Variable</b>                    | <b>Sample Size n (%)</b> |        |
|------------------------------------|--------------------------|--------|
| <b>Region</b>                      |                          |        |
| Dakar                              | 1,335                    | (26.6) |
| Ziguinchor                         | 201                      | (4.0)  |
| Diourbel                           | 592                      | (11.8) |
| Saint-Louis                        | 301                      | (6.0)  |
| Tambacounda                        | 206                      | (4.1)  |
| Kaolack                            | 382                      | (7.6)  |
| Thiès                              | 673                      | (13.4) |
| Louga                              | 361                      | (7.2)  |
| Fatick                             | 236                      | (4.7)  |
| Kolda                              | 196                      | (3.9)  |
| Matam                              | 186                      | (3.7)  |
| Kaffrine                           | 186                      | (3.7)  |
| Kedougou                           | 35                       | (0.7)  |
| Sedhiou                            | 131                      | (2.6)  |
| <b>Level of Education</b>          |                          |        |
| No Education                       | 2,791                    | (55.6) |
| Primary                            | 1,089                    | (21.7) |
| Secondary                          | 1,049                    | (20.9) |
| Higher                             | 90                       | (1.8)  |
| <b>Wealth Quintile</b>             |                          |        |
| Poorest                            | 768                      | (15.3) |
| Poorer                             | 838                      | (16.7) |
| Middle                             | 1,029                    | (20.5) |
| Richer                             | 1,130                    | (22.5) |
| Richest                            | 1,255                    | (25.0) |
| <b>Occupation</b>                  |                          |        |
| Not Working                        | 2666                     | (53.1) |
| Nonmanual                          | 1,822                    | (36.3) |
| Manual                             | 85                       | (1.7)  |
| Agricultural                       | 447                      | (8.9)  |
| <b>Media Exposure</b>              |                          |        |
| Not Exposed                        | 361                      | (7.2)  |
| Exposed to one media source        | 1,064                    | (21.2) |
| Exposed to two media sources       | 2,535                    | (50.5) |
| Exposed to three media sources     | 1,059                    | (21.1) |
| <b>Hormonal Contraceptives use</b> |                          |        |
| No                                 | 4,598                    | (91.6) |
| Yes                                | 422                      | (8.4)  |

**Table S13:** Descriptive statistics for the study population in Namibia.

| <b>Variable</b>            | <b>Sample Size n (%)</b> |        |
|----------------------------|--------------------------|--------|
| <b>Total Sample Size</b>   | 3,921                    | (100)  |
| <b>Nutritional status</b>  |                          |        |
| Underweight                | 549                      | (14.0) |
| Normal Weight              | 2,137                    | (54.5) |
| Overweight/Obesity         | 1,235                    | (31.5) |
| <b>Age</b>                 |                          |        |
| 15-19                      | 823                      | (21.0) |
| 20-24                      | 753                      | (19.2) |
| 25-29                      | 612                      | (15.6) |
| 30-34                      | 514                      | (13.1) |
| 35-39                      | 498                      | (12.7) |
| 40-44                      | 392                      | (10.0) |
| 45-49                      | 329                      | (8.4)  |
| <b>Religion</b>            |                          |        |
| Catholic                   | 772                      | (19.7) |
| Other Christians           | 2,776                    | (70.8) |
| Others                     | 329                      | (8.4)  |
| No Religion                | 43                       | (1.1)  |
| <b>Parity</b>              |                          |        |
| 0                          | 1,274                    | (32.5) |
| 1                          | 769                      | (19.6) |
| 2                          | 698                      | (17.8) |
| 3                          | 478                      | (12.2) |
| 4                          | 294                      | (7.5)  |
| 5                          | 176                      | (4.5)  |
| 6+                         | 231                      | (5.9)  |
| <b>Marital Status</b>      |                          |        |
| Single                     | 2,368                    | (60.4) |
| Married                    | 1,259                    | (32.1) |
| Formerly Married           | 294                      | (7.5)  |
| <b>Residential Setting</b> |                          |        |
| Rural                      | 1,792                    | (45.7) |
| Urban                      | 2,129                    | (54.3) |
| <b>Region</b>              |                          |        |
| Caprivi                    | 208                      | (5.3)  |
| Erongo                     | 333                      | (8.5)  |
| Hardap                     | 149                      | (3.8)  |
| Karas                      | 157                      | (4.0)  |
| Kavango                    | 341                      | (8.7)  |
| Khomas                     | 823                      | (21.0) |
| Kunene                     | 110                      | (2.8)  |
| Ohangwena                  | 412                      | (10.5) |
| Omaheke                    | 102                      | (2.6)  |
| Omusati                    | 388                      | (9.9)  |
| Oshana                     | 353                      | (9.0)  |
| Oshikoto                   | 310                      | (7.9)  |
| Otjozondjupa               | 235                      | (6.0)  |
| <b>Level of Education</b>  |                          |        |
| No Education               | 184                      | (4.7)  |
| Primary                    | 788                      | (20.1) |
| Secondary                  | 2,604                    | (66.4) |
| Higher                     | 345                      | (8.8)  |

| <b>Variable</b>                    | <b>Sample Size n (%)</b> |        |
|------------------------------------|--------------------------|--------|
| <b>Wealth Quintile</b>             |                          |        |
| Poorest                            | 623                      | (15.9) |
| Poorer                             | 706                      | (18.0) |
| Middle                             | 765                      | (19.5) |
| Richer                             | 949                      | (24.2) |
| Richest                            | 878                      | (22.4) |
| <b>Occupation</b>                  |                          |        |
| Not Working                        | 2,180                    | (55.6) |
| Nonmanual                          | 1,557                    | (39.7) |
| Manual                             | 125                      | (3.2)  |
| Agricultural                       | 59                       | (1.5)  |
| <b>Media Exposure</b>              |                          |        |
| Not Exposed                        | 314                      | (8.0)  |
| Exposed to one media source        | 772                      | (19.7) |
| Exposed to two media sources       | 1,243                    | (31.7) |
| Exposed to three media sources     | 1,592                    | (40.6) |
| <b>Hormonal Contraceptives use</b> |                          |        |
| No                                 | 2,843                    | (72.5) |
| Yes                                | 1,078                    | (27.5) |

**Table S14:** Descriptive statistics for the study population in Congo.

| <b>Variable</b>            | <b>Sample Size n (%)</b> |        |
|----------------------------|--------------------------|--------|
| <b>Total Sample Size</b>   | 4,822                    | (100)  |
| <b>Nutritional status</b>  |                          |        |
| Underweight                | 694                      | (14.4) |
| Normal Weight              | 2,864                    | (59.4) |
| Overweight/Obesity         | 1,263                    | (26.2) |
| <b>Age</b>                 |                          |        |
| 15-19                      | 1,022                    | (21.2) |
| 20-24                      | 853                      | (17.7) |
| 25-29                      | 815                      | (16.9) |
| 30-34                      | 709                      | (14.7) |
| 35-39                      | 617                      | (12.8) |
| 40-44                      | 424                      | (8.8)  |
| 45-49                      | 381                      | (7.9)  |
| <b>Ethnicity</b>           |                          |        |
| Kongo                      | 2,667                    | (55.3) |
| Punu                       | 222                      | (4.6)  |
| Duma                       | 43                       | (0.9)  |
| Mbéré/Mbéti/Kélé           | 101                      | (2.1)  |
| Téké                       | 632                      | (13.1) |
| Mbochi                     | 526                      | (10.9) |
| Sangha                     | 121                      | (2.5)  |
| Oubanguiens                | 39                       | (0.8)  |
| Pygmée                     | 29                       | (0.6)  |
| Etranger                   | 391                      | (8.1)  |
| Others                     | 53                       | (1.1)  |
| <b>Religion</b>            |                          |        |
| Catholic                   | 1,524                    | (31.6) |
| Other Christians           | 2,831                    | (58.7) |
| Islam                      | 53                       | (1.1)  |
| Traditionalists            | 227                      | (4.7)  |
| Other                      | 29                       | (0.6)  |
| No Religion                | 159                      | (3.3)  |
| <b>Parity</b>              |                          |        |
| 0                          | 1,133                    | (23.5) |
| 1                          | 767                      | (15.9) |
| 2                          | 815                      | (16.9) |
| 3                          | 694                      | (14.4) |
| 4                          | 501                      | (10.4) |
| 5                          | 328                      | (6.8)  |
| 6+                         | 583                      | (12.1) |
| <b>Marital Status</b>      |                          |        |
| Single                     | 1,297                    | (26.9) |
| Married                    | 2,676                    | (55.5) |
| Formerly Married           | 849                      | (17.6) |
| <b>Residential Setting</b> |                          |        |
| Rural                      | 1,533                    | (31.8) |
| Urban                      | 3,289                    | (68.2) |

| <b>Variable</b>                    | <b>Sample Size n (%)</b> |        |
|------------------------------------|--------------------------|--------|
| <b>Region</b>                      |                          |        |
| Kouilou                            | 130                      | (2.7)  |
| Niari                              | 246                      | (5.1)  |
| Lekoumou                           | 87                       | (1.8)  |
| Bouenza                            | 530                      | (11.0) |
| Pool                               | 280                      | (5.8)  |
| Plateaux                           | 140                      | (2.9)  |
| Cuvette                            | 149                      | (3.1)  |
| Cuvette - Ouest                    | 58                       | (1.2)  |
| Sangha                             | 77                       | (1.6)  |
| Likouala                           | 193                      | (4.0)  |
| Brazzaville                        | 1,606                    | (33.3) |
| Pointe-noire                       | 1,326                    | (27.5) |
| <b>Level of Education</b>          |                          |        |
| No Education                       | 265                      | (5.5)  |
| Primary                            | 1,186                    | (24.6) |
| Secondary                          | 3,139                    | (65.1) |
| Higher                             | 231                      | (4.8)  |
| <b>Wealth Quintile</b>             |                          |        |
| Poorest                            | 810                      | (16.8) |
| Poorer                             | 979                      | (20.3) |
| Middle                             | 1,032                    | (21.4) |
| Richer                             | 964                      | (20.0) |
| Richest                            | 1,037                    | (21.5) |
| <b>Occupation</b>                  |                          |        |
| Not Working                        | 1,639                    | (34.0) |
| Nonmanual                          | 1,967                    | (40.8) |
| Manual                             | 236                      | (4.9)  |
| Agricultural                       | 935                      | (19.4) |
| Other                              | 43                       | (0.9)  |
| <b>Media Exposure</b>              |                          |        |
| Not Exposed                        | 1,259                    | (26.1) |
| Exposed to one media source        | 1,331                    | (27.6) |
| Exposed to two media sources       | 1,379                    | (28.6) |
| Exposed to three media sources     | 853                      | (17.7) |
| <b>Hormonal Contraceptives use</b> |                          |        |
| No                                 | 4,576                    | (94.9) |
| Yes                                | 246                      | (5.1)  |

**Table S15:** Descriptive statistics for the study population in Nigeria.

| <b>Variable</b>            | <b>Sample Size n (%)</b> |        |
|----------------------------|--------------------------|--------|
| <b>Total Sample Size</b>   | 32,078                   | (100)  |
| <b>Nutritional status</b>  |                          |        |
| Underweight                | 3,689                    | (11.5) |
| Normal Weight              | 20,466                   | (63.8) |
| Overweight/Obesity         | 7,923                    | (24.7) |
| <b>Age</b>                 |                          |        |
| 15-19                      | 6,833                    | (21.3) |
| 20-24                      | 5,229                    | (16.3) |
| 25-29                      | 5,357                    | (16.7) |
| 30-34                      | 4,202                    | (13.1) |
| 35-39                      | 3,914                    | (12.2) |
| 40-44                      | 3,240                    | (10.1) |
| 45-49                      | 3,304                    | (10.3) |
| <b>Ethnicity</b>           |                          |        |
| Ekoi                       | 32                       | (0.1)  |
| Fulani                     | 1,989                    | (6.2)  |
| Hausa                      | 8,372                    | (26.1) |
| Ibibio                     | 770                      | (2.4)  |
| Igala                      | 321                      | (1.0)  |
| Igbo                       | 4,876                    | (15.2) |
| Ijaw/Izon                  | 642                      | (2.0)  |
| Kanuri/Berberi             | 577                      | (1.8)  |
| Tiv                        | 642                      | (2.0)  |
| Yoruba                     | 4,812                    | (15.0) |
| Others                     | 9,046                    | (28.2) |
| <b>Religion</b>            |                          |        |
| Other Christians           | 12,061                   | (37.6) |
| Catholics                  | 3,721                    | (11.6) |
| Islam                      | 16,007                   | (49.9) |
| Traditionalists            | 289                      | (0.9)  |
| <b>Parity</b>              |                          |        |
| 0                          | 10,105                   | (31.5) |
| 1                          | 3,272                    | (10.2) |
| 2                          | 3,079                    | (9.6)  |
| 3                          | 3,047                    | (9.5)  |
| 4                          | 2,983                    | (9.3)  |
| 5                          | 2,598                    | (8.1)  |
| 6+                         | 6,993                    | (21.8) |
| <b>Marital Status</b>      |                          |        |
| Single                     | 8,950                    | (27.9) |
| Married                    | 21,460                   | (66.9) |
| Formerly Married           | 1,668                    | (5.2)  |
| <b>Residential Setting</b> |                          |        |
| Rural                      | 18,060                   | (56.3) |
| Urban                      | 14,018                   | (43.7) |

| <b>Variable</b>           | <b>Sample Size n (%)</b> |        |
|---------------------------|--------------------------|--------|
| <b>Region</b>             |                          |        |
| Sokoto                    | 866                      | (2.7)  |
| Zamfara                   | 1,026                    | (3.2)  |
| Katsina                   | 1,155                    | (3.6)  |
| Jigawa                    | 1,091                    | (3.4)  |
| Yobe                      | 770                      | (2.4)  |
| Borno                     | 1,123                    | (3.5)  |
| Adamawa                   | 642                      | (2.0)  |
| Gombe                     | 417                      | (1.3)  |
| Bauchi                    | 866                      | (2.7)  |
| Kano                      | 2,598                    | (8.1)  |
| Kaduna                    | 1,604                    | (5.0)  |
| Kebbi                     | 962                      | (3.0)  |
| Niger                     | 1,123                    | (3.5)  |
| Fct-Abuja                 | 289                      | (0.9)  |
| Nasarawa                  | 481                      | (1.5)  |
| Plateau                   | 545                      | (1.7)  |
| Taraba                    | 706                      | (2.2)  |
| Benue                     | 994                      | (3.1)  |
| Kogi                      | 609                      | (1.9)  |
| Kwara                     | 545                      | (1.7)  |
| Oyo                       | 1,315                    | (4.1)  |
| Osun                      | 706                      | (2.2)  |
| Ekiti                     | 289                      | (0.9)  |
| Ondo                      | 706                      | (2.2)  |
| Edo                       | 674                      | (2.1)  |
| Anambra                   | 898                      | (2.8)  |
| Enugu                     | 834                      | (2.6)  |
| Ebonyi                    | 962                      | (3.0)  |
| Cross River               | 609                      | (1.9)  |
| Akwa Ibom                 | 770                      | (2.4)  |
| Abia                      | 449                      | (1.4)  |
| Imo                       | 738                      | (2.3)  |
| Rivers                    | 1,091                    | (3.4)  |
| Bayelsa                   | 289                      | (0.9)  |
| Delta                     | 866                      | (2.7)  |
| Lagos                     | 1,732                    | (5.4)  |
| Ogun                      | 738                      | (2.3)  |
| <b>Level of Education</b> |                          |        |
| No Education              | 11,484                   | (35.8) |
| Primary                   | 5,517                    | (17.2) |
| Secondary                 | 11,965                   | (37.3) |
| Higher                    | 3,112                    | (9.7)  |
| <b>Wealth Quintile</b>    |                          |        |
| Poorest                   | 5,485                    | (17.1) |
| Poorer                    | 5,870                    | (18.3) |
| Middle                    | 6,223                    | (19.4) |
| Richer                    | 6,768                    | (21.1) |
| Richest                   | 7,731                    | (24.1) |
| <b>Occupation</b>         |                          |        |
| Not Working               | 11,805                   | (36.8) |
| Nonmanual                 | 14,211                   | (44.3) |
| Manual                    | 2,855                    | (8.9)  |
| Agricultural              | 3,176                    | (9.9)  |
| Others                    | 32                       | (0.1)  |



| <b>Variable</b>                    | <b>Sample Size n (%)</b> |        |
|------------------------------------|--------------------------|--------|
| <b>Media Exposure</b>              |                          |        |
| Not Exposed                        | 8,565                    | (26.7) |
| Exposed to one media source        | 6,833                    | (21.3) |
| Exposed to two media sources       | 10,201                   | (31.8) |
| Exposed to three media sources     | 6,480                    | (20.2) |
| <b>Hormonal Contraceptives use</b> |                          |        |
| No                                 | 30,314                   | (94.5) |
| Yes                                | 1,764                    | (5.5)  |

**Table S16:** Descriptive statistics for the study population in Zambia.

| <b>Variable</b>            | <b>Sample Size n (%)</b> |        |
|----------------------------|--------------------------|--------|
| <b>Total Sample Size</b>   | 14,129                   | (100)  |
| <b>Nutritional status</b>  |                          |        |
| Underweight                | 1,455                    | (10.3) |
| Normal Weight              | 9,424                    | (66.7) |
| Overweight/Obesity         | 3,250                    | (23.0) |
| <b>Age</b>                 |                          |        |
| 15-19                      | 3,221                    | (22.8) |
| 20-24                      | 2,458                    | (17.4) |
| 25-29                      | 2,303                    | (16.3) |
| 30-34                      | 2,049                    | (14.5) |
| 35-39                      | 1,766                    | (12.5) |
| 40-44                      | 1,356                    | (9.6)  |
| 45-49                      | 975                      | (6.9)  |
| <b>Ethnicity</b>           |                          |        |
| Bemba                      | 3,447                    | (24.4) |
| Tonga                      | 1,950                    | (13.8) |
| Chewa                      | 1,046                    | (7.4)  |
| Lozi                       | 819                      | (5.8)  |
| Nsenga                     | 763                      | (5.4)  |
| Tumbuka                    | 706                      | (5.0)  |
| Ngoni                      | 622                      | (4.4)  |
| Lala                       | 438                      | (3.1)  |
| Kaonde                     | 353                      | (2.5)  |
| Namwanga                   | 438                      | (3.1)  |
| Mambwe                     | 410                      | (2.9)  |
| Lunda(North-Western)       | 283                      | (2.0)  |
| Luvale                     | 325                      | (2.3)  |
| Others                     | 2,529                    | (17.9) |
| <b>Religion</b>            |                          |        |
| Catholic                   | 2,600                    | (18.4) |
| Other Christians           | 11,374                   | (80.5) |
| Islam                      | 85                       | (0.6)  |
| Other                      | 71                       | (0.5)  |
| <b>Parity</b>              |                          |        |
| 0                          | 3,561                    | (25.2) |
| 1                          | 1,936                    | (13.7) |
| 2                          | 1,794                    | (12.7) |
| 3                          | 1,597                    | (11.3) |
| 4                          | 1,342                    | (9.5)  |
| 5                          | 1,116                    | (7.9)  |
| 6+                         | 2,783                    | (19.7) |
| <b>Marital Status</b>      |                          |        |
| Single                     | 4,253                    | (30.1) |
| Married                    | 8,054                    | (57.0) |
| Formerly Married           | 1,823                    | (12.9) |
| <b>Residential Setting</b> |                          |        |
| Rural                      | 7,404                    | (52.4) |
| Urban                      | 6,725                    | (47.6) |

| <b>Variable</b>                    | <b>Sample Size n (%)</b> |        |
|------------------------------------|--------------------------|--------|
| <b>Region</b>                      |                          |        |
| Central                            | 1,257                    | (8.9)  |
| Copperbelt                         | 2,487                    | (17.6) |
| Eastern                            | 1,653                    | (11.7) |
| Luapula                            | 933                      | (6.6)  |
| Lusaka                             | 2,896                    | (20.5) |
| Muchinga                           | 735                      | (5.2)  |
| Northern                           | 989                      | (7.0)  |
| North Western                      | 608                      | (4.3)  |
| Southern                           | 1,724                    | (12.2) |
| Western                            | 848                      | (6.0)  |
| <b>Level of Education</b>          |                          |        |
| No Education                       | 1,116                    | (7.9)  |
| Primary                            | 6,542                    | (46.3) |
| Secondary                          | 5,736                    | (40.6) |
| Higher                             | 735                      | (5.2)  |
| <b>Wealth Quintile</b>             |                          |        |
| Poorest                            | 2,360                    | (16.7) |
| Poorer                             | 2,374                    | (16.8) |
| Middle                             | 2,642                    | (18.7) |
| Richer                             | 3,052                    | (21.6) |
| Richest                            | 3,702                    | (26.2) |
| <b>Occupation</b>                  |                          |        |
| Not Working                        | 6,796                    | (48.1) |
| Nonmanual                          | 3,546                    | (25.1) |
| Manual                             | 170                      | (1.2)  |
| Agricultural                       | 3,419                    | (24.2) |
| Other                              | 198                      | (1.4)  |
| <b>Media Exposure</b>              |                          |        |
| Not Exposed                        | 3,405                    | (24.1) |
| Exposed to one media source        | 3,914                    | (27.7) |
| Exposed to two media sources       | 3,716                    | (26.3) |
| Exposed to three media sources     | 3,094                    | (21.9) |
| <b>Hormonal Contraceptives use</b> |                          |        |
| No                                 | 9,989                    | (70.7) |
| Yes                                | 4,140                    | (29.3) |

**Table S17:** Descriptive statistics for the study population in Sierra Leone.

| <b>Variable</b>            | <b>Sample Size n (%)</b> |        |
|----------------------------|--------------------------|--------|
| <b>Sample Size</b>         | 6,971                    | (100)  |
| <b>Nutritional status</b>  |                          |        |
| Underweight                | 641                      | (9.2)  |
| Normal Weight              | 5,047                    | (72.4) |
| Overweight/Obesity         | 1,283                    | (18.4) |
| <b>Age</b>                 |                          |        |
| 15-19                      | 1,555                    | (22.3) |
| 20-24                      | 1,087                    | (15.6) |
| 25-29                      | 1,150                    | (16.5) |
| 30-34                      | 941                      | (13.5) |
| 35-39                      | 997                      | (14.3) |
| 40-44                      | 606                      | (8.7)  |
| 45-49                      | 634                      | (9.1)  |
| <b>Ethnicity</b>           |                          |        |
| Creole                     | 77                       | (1.1)  |
| Fullah                     | 230                      | (3.3)  |
| Kono                       | 293                      | (4.2)  |
| Limba                      | 432                      | (6.2)  |
| Loko                       | 230                      | (3.3)  |
| Mandigo                    | 174                      | (2.5)  |
| Mende                      | 2,307                    | (33.1) |
| Sherbro                    | 174                      | (2.5)  |
| Temne                      | 2,489                    | (35.7) |
| Koranko                    | 195                      | (2.8)  |
| Others                     | 369                      | (5.3)  |
| <b>Religion</b>            |                          |        |
| Other Christians           | 1,506                    | (21.6) |
| Islam                      | 5,451                    | (78.2) |
| Other                      | 14                       | (0.2)  |
| <b>Parity</b>              |                          |        |
| 0                          | 1,743                    | (25.0) |
| 1                          | 941                      | (13.5) |
| 2                          | 857                      | (12.3) |
| 3                          | 753                      | (10.8) |
| 4                          | 753                      | (10.8) |
| 5                          | 641                      | (9.2)  |
| 6+                         | 1,283                    | (18.4) |
| <b>Marital Status</b>      |                          |        |
| Single                     | 2,036                    | (29.2) |
| Married                    | 4,434                    | (63.6) |
| Formerly Married           | 502                      | (7.2)  |
| <b>Residential Setting</b> |                          |        |
| Rural                      | 4,392                    | (63.0) |
| Urban                      | 2,579                    | (37.0) |
| <b>Region</b>              |                          |        |
| Eastern                    | 1,471                    | (21.1) |
| Northern                   | 2,642                    | (37.9) |
| Southern                   | 1,443                    | (20.7) |
| Western                    | 1,415                    | (20.3) |

| <b>Variable</b>                    | <b>Sample Size n (%)</b> |        |
|------------------------------------|--------------------------|--------|
| <b>Level of Education</b>          |                          |        |
| No Education                       | 3,834                    | (55.0) |
| Primary                            | 955                      | (13.7) |
| Secondary                          | 1,952                    | (28.0) |
| Higher                             | 230                      | (3.3)  |
| <b>Wealth Quintile</b>             |                          |        |
| Poorest                            | 1,234                    | (17.7) |
| Poorer                             | 1,283                    | (18.4) |
| Middle                             | 1,331                    | (19.1) |
| Richer                             | 1,387                    | (19.9) |
| Richest                            | 1,736                    | (24.9) |
| <b>Occupation</b>                  |                          |        |
| Not Working                        | 1,980                    | (28.4) |
| Nonmanual                          | 383                      | (5.5)  |
| Manual                             | 1,903                    | (27.3) |
| Agricultural                       | 2,705                    | (38.8) |
| <b>Media Exposure</b>              |                          |        |
| Not Exposed                        | 2,363                    | (33.9) |
| Exposed to one media source        | 3,046                    | (43.7) |
| Exposed to two media sources       | 1,074                    | (15.4) |
| Exposed to three media sources     | 488                      | (7.0)  |
| <b>Hormonal Contraceptives use</b> |                          |        |
| No                                 | 5556                     | (79.7) |
| Yes                                | 1415                     | (20.3) |

**Table S18:** Descriptive statistics for the study population in Mozambique.

| <b>Variable</b>            | <b>Sample Size n (%)</b> |        |
|----------------------------|--------------------------|--------|
| <b>Total Sample Size</b>   | 11,617                   | (100)  |
| <b>Nutritional status</b>  |                          |        |
| Underweight                | 999                      | (8.6)  |
| Normal Weight              | 8,713                    | (75.0) |
| Overweight/Obesity         | 1,905                    | (16.4) |
| <b>Age</b>                 |                          |        |
| 15-19                      | 2,591                    | (22.3) |
| 20-24                      | 1,917                    | (16.5) |
| 25-29                      | 1,859                    | (16.0) |
| 30-34                      | 1,626                    | (14.0) |
| 35-39                      | 1,464                    | (12.6) |
| 40-44                      | 1,080                    | (9.3)  |
| 45-49                      | 1,080                    | (9.3)  |
| <b>Ethnicity</b>           |                          |        |
| Emakhuwa                   | 2,416                    | (20.8) |
| Português                  | 1,104                    | (9.5)  |
| Xichangana                 | 1,626                    | (14.0) |
| Cisena                     | 1,150                    | (9.9)  |
| Elomwe                     | 871                      | (7.5)  |
| Echuwabo                   | 732                      | (6.3)  |
| Cinyanja                   | 883                      | (7.6)  |
| Cindau                     | 569                      | (4.9)  |
| Xitswa                     | 488                      | (4.2)  |
| Cinyungwe                  | 372                      | (3.2)  |
| Ciyao                      | 256                      | (2.2)  |
| Others                     | 1,150                    | (9.9)  |
| <b>Religion</b>            |                          |        |
| Catholic                   | 3,415                    | (29.4) |
| Other Christians           | 4,891                    | (42.1) |
| Islam                      | 1,975                    | (17.0) |
| Other                      | 256                      | (2.2)  |
| No Religion                | 1,080                    | (9.3)  |
| <b>Parity</b>              |                          |        |
| 0                          | 2,602                    | (22.4) |
| 1                          | 1,801                    | (15.5) |
| 2                          | 1,603                    | (13.8) |
| 3                          | 1,382                    | (11.9) |
| 4                          | 1,255                    | (10.8) |
| 5                          | 918                      | (7.9)  |
| 6+                         | 2,056                    | (17.7) |
| <b>Marital Status</b>      |                          |        |
| Single                     | 2,335                    | (20.1) |
| Married                    | 7,551                    | (65.0) |
| Formerly Married           | 1,731                    | (14.9) |
| <b>Residential Setting</b> |                          |        |
| Rural                      | 7,458                    | (64.2) |
| Urban                      | 4,159                    | (35.8) |

| <b>Variable</b>                    | <b>Sample Size n (%)</b> |        |
|------------------------------------|--------------------------|--------|
| <b>Region</b>                      |                          |        |
| Niassa                             | 534                      | (4.6)  |
| Cabo Delgado                       | 836                      | (7.2)  |
| Nampula                            | 1,580                    | (13.6) |
| Zambezia                           | 2,068                    | (17.8) |
| Tete                               | 1,336                    | (11.5) |
| Manica                             | 802                      | (6.9)  |
| Sofala                             | 1,220                    | (10.5) |
| Inhambane                          | 755                      | (6.5)  |
| Gaza                               | 720                      | (6.2)  |
| Maputo Provincia                   | 953                      | (8.2)  |
| Maputo Cidade                      | 813                      | (7.0)  |
| <b>Level of Education</b>          |                          |        |
| No Education                       | 3,590                    | (30.9) |
| Primary                            | 5,762                    | (49.6) |
| Secondary                          | 2,091                    | (18.0) |
| Higher                             | 174                      | (1.5)  |
| <b>Wealth Quintile</b>             |                          |        |
| Poorest                            | 2,103                    | (18.1) |
| Poorer                             | 2,091                    | (18.0) |
| Middle                             | 2,161                    | (18.6) |
| Richer                             | 2,358                    | (20.3) |
| Richest                            | 2,904                    | (25.0) |
| <b>Occupation</b>                  |                          |        |
| Not Working                        | 6,145                    | (52.9) |
| Nonmanual                          | 1,928                    | (16.6) |
| Manual                             | 128                      | (1.1)  |
| Agricultural                       | 3,415                    | (29.4) |
| <b>Media Exposure</b>              |                          |        |
| Not Exposed                        | 3,288                    | (28.3) |
| Exposed to one media source        | 4,531                    | (39.0) |
| Exposed to two media sources       | 2,451                    | (21.1) |
| Exposed to three media sources     | 1,348                    | (11.6) |
| <b>Hormonal Contraceptives use</b> |                          |        |
| No                                 | 10,455                   | (90.0) |
| Yes                                | 1,162                    | (10.0) |

**Table S19:** Descriptive statistics for the study population in Malawi.

| <b>Variable</b>            | <b>Sample Size n (%)</b> |        |
|----------------------------|--------------------------|--------|
| <b>Sample Size</b>         | 7,179                    | (100)  |
| <b>Nutritional status</b>  |                          |        |
| Underweight                | 517                      | (7.2)  |
| Normal Weight              | 5,176                    | (72.1) |
| Overweight/Obesity         | 1,486                    | (20.7) |
| <b>Age</b>                 |                          |        |
| 15-19                      | 1,543                    | (21.5) |
| 20-24                      | 1,407                    | (19.6) |
| 25-29                      | 1,149                    | (16.0) |
| 30-34                      | 1,084                    | (15.1) |
| 35-39                      | 847                      | (11.8) |
| 40-44                      | 646                      | (9.0)  |
| 45-49                      | 503                      | (7.0)  |
| <b>Ethnicity</b>           |                          |        |
| Chewa                      | 2,462                    | (34.3) |
| Tombuka                    | 646                      | (9.0)  |
| Lomwe                      | 1,436                    | (20.0) |
| Tonga                      | 122                      | (1.7)  |
| Yao                        | 969                      | (13.5) |
| Sena                       | 244                      | (3.4)  |
| Nkhonde                    | 65                       | (0.9)  |
| Ngoni                      | 840                      | (11.7) |
| Mang'anja                  | 194                      | (2.7)  |
| Nyanja                     | 79                       | (1.1)  |
| Others                     | 122                      | (1.7)  |
| <b>Religion</b>            |                          |        |
| Catholic                   | 1,299                    | (18.1) |
| Other Christians           | 4,946                    | (68.9) |
| Islam                      | 890                      | (12.4) |
| Other                      | 7                        | (0.1)  |
| No Religion                | 36                       | (0.5)  |
| <b>Parity</b>              |                          |        |
| 0                          | 1,608                    | (22.4) |
| 1                          | 1,041                    | (14.5) |
| 2                          | 1,055                    | (14.7) |
| 3                          | 948                      | (13.2) |
| 4                          | 768                      | (10.7) |
| 5                          | 632                      | (8.8)  |
| 6+                         | 1,127                    | (15.7) |
| <b>Marital Status</b>      |                          |        |
| Single                     | 1,622                    | (22.6) |
| Married                    | 4,551                    | (63.4) |
| Formerly Married           | 1,005                    | (14.0) |
| <b>Residential Setting</b> |                          |        |
| Rural                      | 5,851                    | (81.5) |
| Urban                      | 1,328                    | (18.5) |
| <b>Region</b>              |                          |        |
| Northern                   | 818                      | (11.4) |
| Central                    | 3,044                    | (42.4) |
| Southern                   | 3,317                    | (46.2) |



| <b>Variable</b>                    | <b>Sample Size n (%)</b> |        |
|------------------------------------|--------------------------|--------|
| <b>Level of Education</b>          |                          |        |
| No Education                       | 883                      | (12.3) |
| Primary                            | 4,365                    | (60.8) |
| Secondary                          | 1,701                    | (23.7) |
| Higher                             | 230                      | (3.2)  |
| <b>Wealth Quintile</b>             |                          |        |
| Poorest                            | 1,328                    | (18.5) |
| Poorer                             | 1,386                    | (19.3) |
| Middle                             | 1,357                    | (18.9) |
| Richer                             | 1,371                    | (19.1) |
| Richest                            | 1,737                    | (24.2) |
| <b>Occupation</b>                  |                          |        |
| Not Working                        | 2,290                    | (31.9) |
| Nonmanual                          | 948                      | (13.2) |
| Manual                             | 1,084                    | (15.1) |
| Agricultural                       | 2,857                    | (39.8) |
| <b>Media Exposure</b>              |                          |        |
| Not Exposed                        | 3,152                    | (43.9) |
| Exposed to one media source        | 2,125                    | (29.6) |
| Exposed to two media sources       | 1,228                    | (17.1) |
| Exposed to three media sources     | 675                      | (9.4)  |
| <b>Hormonal Contraceptives use</b> |                          |        |
| No                                 | 4,530                    | (63.1) |
| Yes                                | 2,649                    | (36.9) |

**Table S20:** Descriptive statistics for the study population in Ivory Coast.

| <b>Variable</b>            | <b>Sample Size n (%)</b> |        |
|----------------------------|--------------------------|--------|
| <b>Sample Size</b>         | 4,057                    | (100)  |
| <b>Nutritional status</b>  |                          |        |
| Underweight                | 316                      | (7.8)  |
| Normal Weight              | 2,698                    | (66.5) |
| Overweight/Obesity         | 1,043                    | (25.7) |
| <b>Age</b>                 |                          |        |
| 15-19                      | 876                      | (21.6) |
| 20-24                      | 759                      | (18.7) |
| 25-29                      | 722                      | (17.8) |
| 30-34                      | 548                      | (13.5) |
| 35-39                      | 471                      | (11.6) |
| 40-44                      | 361                      | (8.9)  |
| 45-49                      | 321                      | (7.9)  |
| <b>Ethnicity</b>           |                          |        |
| Akan                       | 1,266                    | (31.2) |
| Krou                       | 430                      | (10.6) |
| Mandé du nord              | 519                      | (12.8) |
| Mandé du sud               | 369                      | (9.1)  |
| Voltaïque/Gur              | 609                      | (15.0) |
| Autres nationalités        | 864                      | (21.3) |
| <b>Religion</b>            |                          |        |
| Catholic                   | 755                      | (18.6) |
| Other Christians           | 1,067                    | (26.3) |
| Islam                      | 1,639                    | (40.4) |
| Traditionalist             | 89                       | (2.2)  |
| Other                      | 53                       | (1.3)  |
| No Religion                | 454                      | (11.2) |
| <b>Parity</b>              |                          |        |
| 0                          | 1,124                    | (27.7) |
| 1                          | 621                      | (15.3) |
| 2                          | 540                      | (13.3) |
| 3                          | 442                      | (10.9) |
| 4                          | 337                      | (8.3)  |
| 5                          | 316                      | (7.8)  |
| 6+                         | 678                      | (16.7) |
| <b>Marital Status</b>      |                          |        |
| Single                     | 1,335                    | (32.9) |
| Married                    | 2,418                    | (59.6) |
| Formerly Married           | 304                      | (7.5)  |
| <b>Residential Setting</b> |                          |        |
| Rural                      | 1,972                    | (48.6) |
| Urban                      | 2,085                    | (51.4) |

| <b>Variable</b>                    | <b>Sample Size n (%)</b> |        |
|------------------------------------|--------------------------|--------|
| <b>Region</b>                      |                          |        |
| Centre                             | 272                      | (6.7)  |
| Centre-Est                         | 110                      | (2.7)  |
| Centre-Nord                        | 329                      | (8.1)  |
| Centre-Ouest                       | 552                      | (13.6) |
| Nord                               | 207                      | (5.1)  |
| Nord-Est                           | 166                      | (4.1)  |
| Nord-Ouest                         | 166                      | (4.1)  |
| Ouest                              | 475                      | (11.7) |
| Sud sans Abidjan                   | 527                      | (13.0) |
| Sud-Ouest                          | 312                      | (7.7)  |
| Ville d'Abidjan                    | 941                      | (23.2) |
| <b>Level of Education</b>          |                          |        |
| No Education                       | 2,170                    | (53.5) |
| Primary                            | 1,018                    | (25.1) |
| Secondary                          | 771                      | (19.0) |
| Higher                             | 97                       | (2.4)  |
| <b>Wealth Quintile</b>             |                          |        |
| Poorest                            | 690                      | (17.0) |
| Poorer                             | 730                      | (18.0) |
| Middle                             | 779                      | (19.2) |
| Richer                             | 856                      | (21.1) |
| Richest                            | 1,002                    | (24.7) |
| <b>Occupation</b>                  |                          |        |
| Not Working                        | 1,160                    | (28.6) |
| Nonmanual                          | 1,740                    | (42.9) |
| Manual                             | 231                      | (5.7)  |
| Agricultural                       | 925                      | (22.8) |
| <b>Media Exposure</b>              |                          |        |
| Not Exposed                        | 1,091                    | (26.9) |
| Exposed to one media source        | 1,245                    | (30.7) |
| Exposed to two media sources       | 1,116                    | (27.5) |
| Exposed to three media sources     | 604                      | (14.9) |
| <b>Hormonal Contraceptives use</b> |                          |        |
| No                                 | 3,684                    | (90.8) |
| Yes                                | 373                      | (9.2)  |

**Table S21:** Descriptive statistics for the study population in Rwanda.

| <b>Variable</b>            | <b>Sample Size n (%)</b> |        |
|----------------------------|--------------------------|--------|
| <b>Sample Size</b>         | 5,995                    | (100)  |
| <b>Nutritional status</b>  |                          |        |
| Underweight                | 402                      | (6.7)  |
| Normal Weight              | 4,358                    | (72.7) |
| Overweight/Obesity         | 1,235                    | (20.6) |
| <b>Age</b>                 |                          |        |
| 15-19                      | 1,349                    | (22.5) |
| 20-24                      | 1,061                    | (17.7) |
| 25-29                      | 977                      | (16.3) |
| 30-34                      | 863                      | (14.4) |
| 35-39                      | 695                      | (11.6) |
| 40-44                      | 570                      | (9.5)  |
| 45-49                      | 480                      | (8.0)  |
| <b>Religion</b>            |                          |        |
| Catholic                   | 2,410                    | (40.2) |
| Other Christians           | 3,447                    | (57.5) |
| Islam                      | 120                      | (2.0)  |
| No Religion                | 18                       | (0.3)  |
| <b>Parity</b>              |                          |        |
| 0                          | 2,206                    | (36.8) |
| 1                          | 791                      | (13.2) |
| 2                          | 743                      | (12.4) |
| 3                          | 594                      | (9.9)  |
| 4                          | 498                      | (8.3)  |
| 5                          | 426                      | (7.1)  |
| 6+                         | 737                      | (12.3) |
| <b>Marital Status</b>      |                          |        |
| Single                     | 2,482                    | (41.4) |
| Married                    | 2,848                    | (47.5) |
| Formerly Married           | 665                      | (11.1) |
| <b>Residential Setting</b> |                          |        |
| Rural                      | 4,802                    | (80.1) |
| Urban                      | 1,193                    | (19.9) |
| <b>Region</b>              |                          |        |
| Kigali city                | 797                      | (13.3) |
| South                      | 1,445                    | (24.1) |
| West                       | 1,307                    | (21.8) |
| North                      | 1,001                    | (16.7) |
| East                       | 1,445                    | (24.1) |
| <b>Level of Education</b>  |                          |        |
| No Education               | 719                      | (12.0) |
| Primary                    | 3,855                    | (64.3) |
| Secondary                  | 1,271                    | (21.2) |
| Higher                     | 150                      | (2.5)  |
| <b>Wealth Quintile</b>     |                          |        |
| Poorest                    | 1,169                    | (19.5) |
| Poorer                     | 1,181                    | (19.7) |
| Middle                     | 1,127                    | (18.8) |
| Richer                     | 1,115                    | (18.6) |
| Richest                    | 1,403                    | (23.4) |

| <b>Variable</b>                    | <b>Sample Size n (%)</b> |        |
|------------------------------------|--------------------------|--------|
| <b>Occupation</b>                  |                          |        |
| Not Working                        | 917                      | (15.3) |
| Nonmanual                          | 971                      | (16.2) |
| Manual                             | 234                      | (3.9)  |
| Agricultural                       | 3,873                    | (64.6) |
| <b>Media Exposure</b>              |                          |        |
| Not Exposed                        | 833                      | (13.9) |
| Exposed to one media source        | 2,236                    | (37.3) |
| Exposed to two media sources       | 1,834                    | (30.6) |
| Exposed to three media sources     | 1,091                    | (18.2) |
| <b>Hormonal Contraceptives use</b> |                          |        |
| No                                 | 4,448                    | (74.2) |
| Yes                                | 1,547                    | (25.8) |

**Table S22:** Descriptive statistics for the study population in Liberia.

| <b>Variable</b>            | <b>Sample Size n (%)</b> |        |
|----------------------------|--------------------------|--------|
| <b>Sample Size</b>         | 3,998                    | (100)  |
| <b>Nutritional status</b>  |                          |        |
| Underweight                | 300                      | (7.5)  |
| Normal Weight              | 2,639                    | (66.0) |
| Overweight/Obesity         | 1,059                    | (26.5) |
| <b>Age</b>                 |                          |        |
| 15-19                      | 864                      | (21.6) |
| 20-24                      | 720                      | (18.0) |
| 25-29                      | 676                      | (16.9) |
| 30-34                      | 496                      | (12.4) |
| 35-39                      | 508                      | (12.7) |
| 40-44                      | 396                      | (9.9)  |
| 45-49                      | 340                      | (8.5)  |
| <b>Ethnicity</b>           |                          |        |
| Bassa                      | 452                      | (11.3) |
| Gio                        | 276                      | (6.9)  |
| Gola                       | 148                      | (3.7)  |
| Grebo                      | 332                      | (8.3)  |
| Kissi                      | 136                      | (3.4)  |
| Kpelle                     | 1,003                    | (25.1) |
| Krahn                      | 116                      | (2.9)  |
| Kru                        | 272                      | (6.8)  |
| Lorma                      | 188                      | (4.7)  |
| Mano                       | 320                      | (8.0)  |
| Vai                        | 196                      | (4.9)  |
| Others                     | 560                      | (14.0) |
| <b>Religion</b>            |                          |        |
| Other Christians           | 3,454                    | (86.4) |
| Islam                      | 448                      | (11.2) |
| No Religion                | 96                       | (2.4)  |
| <b>Parity</b>              |                          |        |
| 0                          | 884                      | (22.1) |
| 1                          | 684                      | (17.1) |
| 2                          | 584                      | (14.6) |
| 3                          | 440                      | (11.0) |
| 4                          | 352                      | (8.8)  |
| 5                          | 304                      | (7.6)  |
| 6+                         | 752                      | (18.8) |
| <b>Marital Status</b>      |                          |        |
| Single                     | 1,323                    | (33.1) |
| Married                    | 2,231                    | (55.8) |
| Formerly Married           | 444                      | (11.1) |
| <b>Residential Setting</b> |                          |        |
| Rural                      | 1,567                    | (39.2) |
| Urban                      | 2,431                    | (60.8) |
| <b>Region</b>              |                          |        |
| North Western              | 360                      | (9.0)  |
| South Central              | 2,123                    | (53.1) |
| South Eastern A            | 204                      | (5.1)  |
| South Eastern B            | 252                      | (6.3)  |
| North Central              | 1,059                    | (26.5) |

| <b>Variable</b>                    | <b>Sample Size n (%)</b> |        |
|------------------------------------|--------------------------|--------|
| <b>Level of Education</b>          |                          |        |
| No Education                       | 1,327                    | (33.2) |
| Primary                            | 1,159                    | (29.0) |
| Secondary                          | 1,383                    | (34.6) |
| Higher                             | 128                      | (3.2)  |
| <b>Wealth Quintile</b>             |                          |        |
| Poorest                            | 692                      | (17.3) |
| Poorer                             | 716                      | (17.9) |
| Middle                             | 704                      | (17.6) |
| Richer                             | 956                      | (23.9) |
| Richest                            | 932                      | (23.3) |
| <b>Occupation</b>                  |                          |        |
| Not Working                        | 1,687                    | (42.2) |
| Nonmanual                          | 1,211                    | (30.3) |
| Manual                             | 104                      | (2.6)  |
| Agricultural                       | 940                      | (23.5) |
| Others                             | 56                       | (1.4)  |
| <b>Media Exposure</b>              |                          |        |
| Not Exposed                        | 872                      | (21.8) |
| Exposed to one media source        | 1,431                    | (35.8) |
| Exposed to two media sources       | 1,051                    | (26.3) |
| Exposed to three media sources     | 644                      | (16.1) |
| <b>Hormonal Contraceptives use</b> |                          |        |
| No                                 | 3,142                    | (78.6) |
| Yes                                | 856                      | (21.4) |

**Table S23:** Descriptive statistics for the study population in Benin.

| <b>Variable</b>            | <b>Sample Size n (%)</b> |        |
|----------------------------|--------------------------|--------|
| <b>Sample Size</b>         | 14,060                   | (100)  |
| <b>Nutritional status</b>  |                          |        |
| Underweight                | 886                      | (6.3)  |
| Normal Weight              | 9,392                    | (66.8) |
| Overweight/Obesity         | 3,782                    | (26.9) |
| <b>Age</b>                 |                          |        |
| 15-19                      | 2,643                    | (18.8) |
| 20-24                      | 2,278                    | (16.2) |
| 25-29                      | 2,503                    | (17.8) |
| 30-34                      | 2,179                    | (15.5) |
| 35-39                      | 1,884                    | (13.4) |
| 40-44                      | 1,504                    | (10.7) |
| 45-49                      | 1,069                    | (7.6)  |
| <b>Ethnicity</b>           |                          |        |
| Adja                       | 2,207                    | (15.7) |
| Bariba                     | 1,195                    | (8.5)  |
| Dendi                      | 436                      | (3.1)  |
| Fon                        | 6,468                    | (46.0) |
| Yoa                        | 408                      | (2.9)  |
| Betamaribe                 | 858                      | (6.1)  |
| Peulh                      | 436                      | (3.1)  |
| Yoruba                     | 1,772                    | (12.6) |
| Other Béninois             | 56                       | (0.4)  |
| Other Nationalities        | 225                      | (1.6)  |
| <b>Religion</b>            |                          |        |
| Catholic                   | 4,710                    | (33.5) |
| Other Christians           | 3,529                    | (25.1) |
| Islam                      | 3,093                    | (22.0) |
| Traditionalists            | 1,772                    | (12.6) |
| Other                      | 267                      | (1.9)  |
| No Religion                | 689                      | (4.9)  |
| <b>Parity</b>              |                          |        |
| 0                          | 3,726                    | (26.5) |
| 1                          | 1,715                    | (12.2) |
| 2                          | 1,870                    | (13.3) |
| 3                          | 1,772                    | (12.6) |
| 4                          | 1,603                    | (11.4) |
| 5                          | 1,195                    | (8.5)  |
| 6+                         | 2,179                    | (15.5) |
| <b>Marital Status</b>      |                          |        |
| Single                     | 3,698                    | (26.3) |
| Married                    | 9,491                    | (67.5) |
| Formerly Married           | 872                      | (6.2)  |
| <b>Residential Setting</b> |                          |        |
| Rural                      | 7,466                    | (53.1) |
| Urban                      | 6,594                    | (46.9) |



| <b>Variable</b>                    | <b>Sample Size n (%)</b> |        |
|------------------------------------|--------------------------|--------|
| <b>Region</b>                      |                          |        |
| Alibori                            | 703                      | (5.0)  |
| Atacora                            | 1,153                    | (8.2)  |
| Atlantique                         | 1,758                    | (12.5) |
| Borgou                             | 1,012                    | (7.2)  |
| Collines                           | 942                      | (6.7)  |
| Couffo                             | 970                      | (6.9)  |
| Donga                              | 576                      | (4.1)  |
| Littoral                           | 2,221                    | (15.8) |
| Mono                               | 787                      | (5.6)  |
| Ouémé                              | 1,687                    | (12.0) |
| Plateau                            | 984                      | (7.0)  |
| Zou                                | 1,265                    | (9.0)  |
| <b>Level of Education</b>          |                          |        |
| No Education                       | 8,211                    | (58.4) |
| Primary                            | 2,475                    | (17.6) |
| Secondary                          | 3,107                    | (22.1) |
| Higher                             | 267                      | (1.9)  |
| <b>Wealth Quintile</b>             |                          |        |
| Poorest                            | 2,362                    | (16.8) |
| Poorer                             | 2,531                    | (18.0) |
| Middle                             | 2,615                    | (18.6) |
| Richer                             | 3,051                    | (21.7) |
| Richest                            | 3,501                    | (24.9) |
| <b>Occupation</b>                  |                          |        |
| Not Working                        | 5,329                    | (37.9) |
| Nonmanual                          | 5,202                    | (37.0) |
| Manual                             | 830                      | (5.9)  |
| Agricultural                       | 1,997                    | (14.2) |
| Others                             | 703                      | (5.0)  |
| <b>Media Exposure</b>              |                          |        |
| Not Exposed                        | 4,063                    | (28.9) |
| Exposed to one media source        | 3,698                    | (26.3) |
| Exposed to two media sources       | 4,499                    | (32.0) |
| Exposed to three media sources     | 1,800                    | (12.8) |
| <b>Hormonal Contraceptives use</b> |                          |        |
| No                                 | 13,455                   | (95.7) |
| Yes                                | 605                      | (4.3)  |

**Table S24:** Descriptive statistics for the study population in Kenya.

| <b>Variable</b>            | <b>Sample Size n (%)</b> |        |
|----------------------------|--------------------------|--------|
| <b>Total Sample Size</b>   | 12,967                   | (100)  |
| <b>Nutritional status</b>  |                          |        |
| Underweight                | 1,167                    | (9.0)  |
| Normal Weight              | 7,547                    | (58.2) |
| Overweight/Obesity         | 4,253                    | (32.8) |
| <b>Age</b>                 |                          |        |
| 15-19                      | 2,451                    | (18.9) |
| 20-24                      | 2,230                    | (17.2) |
| 25-29                      | 2,516                    | (19.4) |
| 30-34                      | 1,893                    | (14.6) |
| 35-39                      | 1,647                    | (12.7) |
| 40-44                      | 1,219                    | (9.4)  |
| 45-49                      | 1,011                    | (7.8)  |
| <b>Ethnicity</b>           |                          |        |
| Embu                       | 130                      | (1.0)  |
| Kalenjin                   | 1,595                    | (12.3) |
| Kamba                      | 1,504                    | (11.6) |
| Kikuyu                     | 2,749                    | (21.2) |
| Kisii                      | 791                      | (6.1)  |
| Luhya                      | 2,049                    | (15.8) |
| Luo                        | 1,375                    | (10.6) |
| Maasai                     | 246                      | (1.9)  |
| Meru                       | 765                      | (5.9)  |
| Mijikenda/Swahili          | 674                      | (5.2)  |
| Somali                     | 272                      | (2.1)  |
| Taita/Taveta               | 117                      | (0.9)  |
| Turkana                    | 156                      | (1.2)  |
| Samburu                    | 52                       | (0.4)  |
| Other                      | 493                      | (3.8)  |
| <b>Religion</b>            |                          |        |
| Catholic                   | 2,593                    | (20.0) |
| Other Christians           | 9,362                    | (72.2) |
| Islam                      | 765                      | (5.9)  |
| Others                     | 39                       | (0.3)  |
| No Religion                | 207                      | (1.6)  |
| <b>Parity</b>              |                          |        |
| 0                          | 3,410                    | (26.3) |
| 1                          | 1,971                    | (15.2) |
| 2                          | 2,075                    | (16.0) |
| 3                          | 1,712                    | (13.2) |
| 4                          | 1,297                    | (10.0) |
| 5                          | 882                      | (6.8)  |
| 6+                         | 1,621                    | (12.5) |
| <b>Marital Status</b>      |                          |        |
| Single                     | 3,955                    | (30.5) |
| Married                    | 7,469                    | (57.6) |
| Formerly Married           | 1,543                    | (11.9) |
| <b>Residential Setting</b> |                          |        |
| Rural                      | 7,780                    | (60.0) |
| Urban                      | 5,187                    | (40.0) |

| <b>Variable</b>                    | <b>Sample Size n (%)</b> |        |
|------------------------------------|--------------------------|--------|
| <b>Region</b>                      |                          |        |
| Coast                              | 1,245                    | (9.6)  |
| North Eastern                      | 233                      | (1.8)  |
| Eastern                            | 1,893                    | (14.6) |
| Central                            | 1,673                    | (12.9) |
| Rift Valley                        | 3,307                    | (25.5) |
| Western                            | 1,413                    | (10.9) |
| Nyanza                             | 1,699                    | (13.1) |
| Nairobi                            | 1,504                    | (11.6) |
| <b>Level of Education</b>          |                          |        |
| No Education                       | 843                      | (6.5)  |
| Primary                            | 6,509                    | (50.2) |
| Secondary                          | 4,227                    | (32.6) |
| Higher                             | 1,387                    | (10.7) |
| <b>Wealth Quintile</b>             |                          |        |
| Poorest                            | 1,906                    | (14.7) |
| Poorer                             | 2,308                    | (17.8) |
| Middle                             | 2,580                    | (19.9) |
| Richer                             | 2,775                    | (21.4) |
| Richest                            | 3,397                    | (26.2) |
| <b>Occupation</b>                  |                          |        |
| Not Working                        | 4,357                    | (33.6) |
| Nonmanual                          | 4,940                    | (38.1) |
| Manual                             | 934                      | (7.2)  |
| Agricultural                       | 2,736                    | (21.1) |
| <b>Media Exposure</b>              |                          |        |
| Not Exposed                        | 1,504                    | (11.6) |
| Exposed to one media source        | 3,786                    | (29.2) |
| Exposed to two media sources       | 4,240                    | (32.7) |
| Exposed to three media sources     | 3,436                    | (26.5) |
| <b>Hormonal Contraceptives use</b> |                          |        |
| No                                 | 8,454                    | (65.2) |
| Yes                                | 4,513                    | (34.8) |

**Table S25:** Descriptive statistics for the study population in Sao Tome and Principe.

| <b>Variable</b>            | <b>Sample Size n (%)</b> |        |
|----------------------------|--------------------------|--------|
| <b>Sample Size</b>         | 2,078                    | (100)  |
| <b>Nutritional status</b>  |                          |        |
| Underweight                | 160                      | (7.7)  |
| Normal Weight              | 1,226                    | (59.0) |
| Overweight/Obesity         | 692                      | (33.3) |
| <b>Age</b>                 |                          |        |
| 15-19                      | 453                      | (21.8) |
| 20-24                      | 347                      | (16.7) |
| 25-29                      | 330                      | (15.9) |
| 30-34                      | 310                      | (14.9) |
| 35-39                      | 204                      | (9.8)  |
| 40-44                      | 247                      | (11.9) |
| 45-49                      | 187                      | (9.0)  |
| <b>Religion</b>            |                          |        |
| Catholic                   | 1,459                    | (70.2) |
| Other Christians           | 301                      | (14.5) |
| Other                      | 102                      | (4.9)  |
| No Religion                | 216                      | (10.4) |
| <b>Parity</b>              |                          |        |
| 0                          | 544                      | (26.2) |
| 1                          | 274                      | (13.2) |
| 2                          | 291                      | (14.0) |
| 3                          | 276                      | (13.3) |
| 4                          | 220                      | (10.6) |
| 5                          | 160                      | (7.7)  |
| 6+                         | 312                      | (15.0) |
| <b>Marital Status</b>      |                          |        |
| Single                     | 524                      | (25.2) |
| Married                    | 1,299                    | (62.5) |
| Formerly Married           | 256                      | (12.3) |
| <b>Region</b>              |                          |        |
| Região Centro              | 1,216                    | (58.5) |
| Região Sul                 | 305                      | (14.7) |
| Região Norte               | 449                      | (21.6) |
| Região do Príncipe         | 108                      | (5.2)  |
| <b>Residential Setting</b> |                          |        |
| Rural                      | 756                      | (36.4) |
| Urban                      | 1,322                    | (63.6) |
| <b>Level of Education</b>  |                          |        |
| No Education               | 125                      | (6.0)  |
| Primary                    | 1,189                    | (57.2) |
| Secondary                  | 765                      | (36.8) |
| <b>Wealth Quintile</b>     |                          |        |
| Poorest                    | 362                      | (17.4) |
| Poorer                     | 387                      | (18.6) |
| Middle                     | 349                      | (16.8) |
| Richer                     | 455                      | (21.9) |
| Richest                    | 526                      | (25.3) |
| <b>Occupation</b>          |                          |        |
| Not Working                | 860                      | (41.4) |
| Nonmanual                  | 1,056                    | (50.8) |
| Manual                     | 162                      | (7.8)  |

| <b>Variable</b>                    | <b>Sample Size n (%)</b> |        |
|------------------------------------|--------------------------|--------|
| <b>Media Exposure</b>              |                          |        |
| Not Exposed                        | 77                       | (3.7)  |
| Exposed to one media source        | 87                       | (4.2)  |
| Exposed to two media sources       | 794                      | (38.2) |
| Exposed to three media sources     | 1,120                    | (53.9) |
| <b>Hormonal Contraceptives use</b> |                          |        |
| No                                 | 1,644                    | (79.1) |
| Yes                                | 434                      | (20.9) |

**Table S26:** Descriptive statistics for the study population in Togo.

| <b>Variable</b>                       | <b>Sample Size n (%)</b> |        |
|---------------------------------------|--------------------------|--------|
| <b>Sample Size</b>                    | 4,238                    | (100)  |
| <b>Nutritional status</b>             |                          |        |
| Underweight                           | 297                      | (7.0)  |
| Normal Weight                         | 2,640                    | (62.3) |
| Overweight/Obesity                    | 1,301                    | (30.7) |
| <b>Age</b>                            |                          |        |
| 15-19                                 | 831                      | (19.6) |
| 20-24                                 | 729                      | (17.2) |
| 25-29                                 | 661                      | (15.6) |
| 30-34                                 | 585                      | (13.8) |
| 35-39                                 | 576                      | (13.6) |
| 40-44                                 | 470                      | (11.1) |
| 45-49                                 | 386                      | (9.1)  |
| <b>Ethnicity</b>                      |                          |        |
| Adja-Ewé/Mina                         | 1,784                    | (42.1) |
| Kabye/Tem                             | 1,110                    | (26.2) |
| Akposso/Akebou                        | 174                      | (4.1)  |
| Ana-Ife                               | 123                      | (2.9)  |
| Para-Gourma/Akan                      | 737                      | (17.4) |
| Other Togolese                        | 68                       | (1.6)  |
| Stranger                              | 242                      | (5.7)  |
| <b>Religion</b>                       |                          |        |
| Other Christians                      | 2,623                    | (61.9) |
| Islam                                 | 716                      | (16.9) |
| Traditionalist                        | 602                      | (14.2) |
| No Religion                           | 297                      | (7.0)  |
| <b>Parity</b>                         |                          |        |
| 0                                     | 1,259                    | (29.7) |
| 1                                     | 615                      | (14.5) |
| 2                                     | 538                      | (12.7) |
| 3                                     | 487                      | (11.5) |
| 4                                     | 407                      | (9.6)  |
| 5                                     | 301                      | (7.1)  |
| 6+                                    | 631                      | (14.9) |
| <b>Marital Status</b>                 |                          |        |
| Single                                | 1,263                    | (29.8) |
| Married                               | 2,649                    | (62.5) |
| Formerly Married                      | 326                      | (7.7)  |
| <b>Residential Setting</b>            |                          |        |
| Rural                                 | 2,263                    | (53.4) |
| Urban                                 | 1,975                    | (46.6) |
| <b>Region</b>                         |                          |        |
| Grande Agglomération de Lomé          | 1,322                    | (31.2) |
| Maritime (Sans Agglomération de Lomé) | 661                      | (15.6) |
| Plateaux                              |                          |        |
| Centrale                              | 915                      | (21.6) |
| Kara                                  | 403                      | (9.5)  |
| Savenes                               | 470                      | (11.1) |
|                                       | 466                      | (11.0) |

| <b>Variable</b>                    | <b>Sample Size n (%)</b> |        |
|------------------------------------|--------------------------|--------|
| <b>Level of Education</b>          |                          |        |
| No Education                       | 1,280                    | (30.2) |
| Primary                            | 1,441                    | (34.0) |
| Secondary                          | 1373                     | (32.4) |
| Higher                             | 144                      | (3.4)  |
| <b>Wealth Quintile</b>             |                          |        |
| Poorest                            | 708                      | (16.7) |
| Poorer                             | 665                      | (15.7) |
| Middle                             | 767                      | (18.1) |
| Richer                             | 1,004                    | (23.7) |
| Richest                            | 1,093                    | (25.8) |
| <b>Occupation</b>                  |                          |        |
| Not Working                        | 1,144                    | (27.0) |
| Nonmanual                          | 1,831                    | (43.2) |
| Manual                             | 483                      | (11.4) |
| Agricultural                       | 780                      | (18.4) |
| <b>Media Exposure</b>              |                          |        |
| Not Exposed                        | 1,144                    | (27.0) |
| Exposed to one media source        | 1,301                    | (30.7) |
| Exposed to two media sources       | 1,322                    | (31.2) |
| Exposed to three media sources     | 470                      | (11.1) |
| <b>Hormonal Contraceptives use</b> |                          |        |
| No                                 | 3,746                    | (88.4) |
| Yes                                | 492                      | (11.6) |

**Table S27:** Descriptive statistics for the study population in Cameroon.

| <b>Variable</b>                  | <b>Sample Size n (%)</b> |        |
|----------------------------------|--------------------------|--------|
| <b>Sample Size</b>               | 6,813                    | (100)  |
| <b>Nutritional status</b>        |                          |        |
| Underweight                      | 470                      | (6.9)  |
| Normal Weight                    | 4,156                    | (61.0) |
| Overweight/Obesity               | 2,187                    | (32.1) |
| <b>Age</b>                       |                          |        |
| 15-19                            | 1,669                    | (24.5) |
| 20-24                            | 1,308                    | (19.2) |
| 25-29                            | 1,145                    | (16.8) |
| 30-34                            | 804                      | (11.8) |
| 35-39                            | 736                      | (10.8) |
| 40-44                            | 572                      | (8.4)  |
| 45-49                            | 579                      | (8.5)  |
| <b>Ethnicity</b>                 |                          |        |
| Arabes-Choa/Peulh/Haoussa/Kanuri | 579                      | (8.5)  |
| Biu-Mandara                      |                          |        |
| Adamaoua-Oubangui                | 899                      | (13.2) |
| Bantoïde Sud-Ouest               | 620                      | (9.1)  |
| Grassfields                      | 89                       | (1.3)  |
| Bamilike/Bamoun                  | 1,022                    | (15.0) |
| Côtier/Ngoe/Oroko                | 1,703                    | (25.0) |
| Beti/Bassa/Mbam                  | 293                      | (4.3)  |
| Kako/Meka/Pygmé                  | 1,254                    | (18.4) |
| Stranger/Others                  | 191                      | (2.8)  |
|                                  | 164                      | (2.4)  |
| <b>Religion</b>                  |                          |        |
| Catholic                         | 2,541                    | (37.3) |
| Other Christians                 | 2,569                    | (37.7) |
| Islam                            | 1,301                    | (19.1) |
| Traditionalist                   | 184                      | (2.7)  |
| Others                           | 82                       | (1.2)  |
| No Religion                      | 136                      | (2.0)  |
| <b>Parity</b>                    |                          |        |
| 0                                | 2,119                    | (31.1) |
| 1                                | 940                      | (13.8) |
| 2                                | 838                      | (12.3) |
| 3                                | 681                      | (10.0) |
| 4                                | 559                      | (8.2)  |
| 5                                | 477                      | (7.0)  |
| 6+                               | 1,199                    | (17.6) |
| <b>Marital Status</b>            |                          |        |
| Single                           | 2,092                    | (30.7) |
| Married                          | 4,095                    | (60.1) |
| Formerly Married                 | 627                      | (9.2)  |
| <b>Residential Setting</b>       |                          |        |
| Rural                            | 3,025                    | (44.4) |
| Urban                            | 3,788                    | (55.6) |



| <b>Variable</b>                    | <b>Sample Size n (%)</b> |        |
|------------------------------------|--------------------------|--------|
| <b>Region</b>                      |                          |        |
| Adamaoua                           | 334                      | (4.9)  |
| Centre (sans Yaoundé)              | 463                      | (6.8)  |
| Douala                             | 824                      | (12.1) |
| Est                                | 266                      | (3.9)  |
| Extrême-Nord                       | 1,036                    | (15.2) |
| Littoral (sans Douala)             | 286                      | (4.2)  |
| Nord                               | 640                      | (9.4)  |
| Nord-Ouest                         | 722                      | (10.6) |
| Ouest                              | 749                      | (11.0) |
| Sud                                | 184                      | (2.7)  |
| Sud-Ouest                          | 518                      | (7.6)  |
| Yaoundé                            | 790                      | (11.6) |
| <b>Level of Education</b>          |                          |        |
| No Education                       | 1,213                    | (17.8) |
| Primary                            | 2,330                    | (34.2) |
| Secondary                          | 2,868                    | (42.1) |
| Higher                             | 402                      | (5.9)  |
| <b>Wealth Quintile</b>             |                          |        |
| Poorest                            | 1,015                    | (14.9) |
| Poorer                             | 1,158                    | (17.0) |
| Middle                             | 1,274                    | (18.7) |
| Richer                             | 1,642                    | (24.1) |
| Richest                            | 1,724                    | (25.3) |
| <b>Occupation</b>                  |                          |        |
| Not Working                        | 2,112                    | (31.0) |
| Nonmanual                          | 2,119                    | (31.1) |
| Manual                             | 831                      | (12.2) |
| Agricultural                       | 1,751                    | (25.7) |
| <b>Media Exposure</b>              |                          |        |
| Not Exposed                        | 1,676                    | (24.6) |
| Exposed to one media source        | 1,587                    | (23.3) |
| Exposed to two media sources       | 2,044                    | (30.0) |
| Exposed to three media sources     | 1,506                    | (22.1) |
| <b>Hormonal Contraceptives use</b> |                          |        |
| No                                 | 6,459                    | (94.8) |
| Yes                                | 354                      | (5.2)  |

**Table S28:** Descriptive statistics for study population in Comoros.

| <b>Variable</b>                | <b>Sample Size n (%)</b> |        |
|--------------------------------|--------------------------|--------|
| <b>Total Sample Size</b>       | 4,479                    | (100)  |
| <b>Nutritional status</b>      |                          |        |
| Underweight                    | 318                      | (7.1)  |
| Normal Weight                  | 2,562                    | (57.2) |
| Overweight/Obesity             | 1,599                    | (35.7) |
| <b>Age</b>                     |                          |        |
| 15-19                          | 1,178                    | (26.3) |
| 20-24                          | 806                      | (18.0) |
| 25-29                          | 690                      | (15.4) |
| 30-34                          | 596                      | (13.3) |
| 35-39                          | 529                      | (11.8) |
| 40-44                          | 412                      | (9.2)  |
| 45-49                          | 269                      | (6.0)  |
| <b>Parity</b>                  |                          |        |
| 0                              | 2,145                    | (47.9) |
| 1                              | 394                      | (8.8)  |
| 2                              | 385                      | (8.6)  |
| 3                              | 376                      | (8.4)  |
| 4                              | 331                      | (7.4)  |
| 5                              | 237                      | (5.3)  |
| 6+                             | 609                      | (13.6) |
| <b>Marital Status</b>          |                          |        |
| Single                         | 1,608                    | (35.9) |
| Married                        | 2,558                    | (57.1) |
| Formerly Married               | 314                      | (7.0)  |
| <b>Residential Setting</b>     |                          |        |
| Rural                          | 2,938                    | (65.6) |
| Urban                          | 1,541                    | (34.4) |
| <b>Region</b>                  |                          |        |
| Ngazidja                       | 2,159                    | (48.2) |
| Mwali                          | 269                      | (6.0)  |
| Ndzuwani                       | 2,051                    | (45.8) |
| <b>Level of Education</b>      |                          |        |
| No Education                   | 1,380                    | (30.8) |
| Primary                        | 833                      | (18.6) |
| Secondary                      | 1,841                    | (41.1) |
| Higher                         | 426                      | (9.5)  |
| <b>Wealth Quintile</b>         |                          |        |
| Poorest                        | 708                      | (15.8) |
| Poorer                         | 882                      | (19.7) |
| Middle                         | 941                      | (21.0) |
| Richer                         | 950                      | (21.2) |
| Richest                        | 999                      | (22.3) |
| <b>Occupation</b>              |                          |        |
| Not Working                    | 2,737                    | (61.1) |
| Nonmanual                      | 873                      | (19.5) |
| Manual                         | 434                      | (9.7)  |
| Agricultural                   | 434                      | (9.7)  |
| <b>Media Exposure</b>          |                          |        |
| Not Exposed                    | 815                      | (18.2) |
| Exposed to one media source    | 1,026                    | (22.9) |
| Exposed to two media sources   | 1,774                    | (39.6) |
| Exposed to three media sources | 864                      | (19.3) |

| <b>Variable</b>                    | <b>Sample Size n (%)</b> |        |
|------------------------------------|--------------------------|--------|
| <b>Hormonal Contraceptives use</b> |                          |        |
| No                                 | 4,143                    | (92.5) |
| Yes                                | 336                      | (7.5)  |

**Table S29:** Descriptive statistics for the study population in Tanzania.

| <b>Variable</b>            | <b>Sample Size n (%)</b> |        |
|----------------------------|--------------------------|--------|
| <b>Sample Size</b>         | 11,535                   | (100)  |
| <b>Nutritional status</b>  |                          |        |
| Underweight                | 1,096                    | (9.5)  |
| Normal Weight              | 7,152                    | (62.0) |
| Overweight/Obesity         | 3,287                    | (28.5) |
| <b>Age</b>                 |                          |        |
| 15-19                      | 2,549                    | (22.1) |
| 20-24                      | 2,042                    | (17.7) |
| 25-29                      | 1,742                    | (15.1) |
| 30-34                      | 1,488                    | (12.9) |
| 35-39                      | 1,442                    | (12.5) |
| 40-44                      | 1,292                    | (11.2) |
| 45-49                      | 980                      | (8.5)  |
| <b>Parity</b>              |                          |        |
| 0                          | 3,045                    | (26.4) |
| 1                          | 1,776                    | (15.4) |
| 2                          | 1,569                    | (13.6) |
| 3                          | 1,292                    | (11.2) |
| 4                          | 1,073                    | (9.3)  |
| 5                          | 865                      | (7.5)  |
| 6+                         | 1,915                    | (16.6) |
| <b>Marital Status</b>      |                          |        |
| Single                     | 3,161                    | (27.4) |
| Married                    | 6,806                    | (59.0) |
| Formerly Married           | 1,569                    | (13.6) |
| <b>Residential Setting</b> |                          |        |
| Rural                      | 7,256                    | (62.9) |
| Urban                      | 4,279                    | (37.1) |
| <b>Level of Education</b>  |                          |        |
| No Education               | 1,638                    | (14.2) |
| Primary                    | 7,094                    | (61.5) |
| Secondary                  | 2,642                    | (22.9) |
| Higher                     | 161                      | (1.4)  |

| <b>Variable</b>                    | <b>Sample Size n (%)</b> |        |
|------------------------------------|--------------------------|--------|
| <b>Region</b>                      |                          |        |
| Dodoma                             | 496                      | (4.3)  |
| Arusha                             | 450                      | (3.9)  |
| Kilimanjaro                        | 335                      | (2.9)  |
| Tanga                              | 623                      | (5.4)  |
| Morogoro                           | 577                      | (5.0)  |
| Pwani                              | 254                      | (2.2)  |
| Dar es salaam                      | 1,384                    | (12.0) |
| Lindi                              | 265                      | (2.3)  |
| Mtwara                             | 381                      | (3.3)  |
| Ruvuma                             | 323                      | (2.8)  |
| Iringa                             | 219                      | (1.9)  |
| Mbeya                              | 715                      | (6.2)  |
| Singida                            | 311                      | (2.7)  |
| Tabora                             | 588                      | (5.1)  |
| Rukwa                              | 242                      | (2.1)  |
| Kigoma                             | 473                      | (4.1)  |
| Shinyanga                          | 415                      | (3.6)  |
| Kagera                             | 542                      | (4.7)  |
| Mwanza                             | 715                      | (6.2)  |
| Mara                               | 427                      | (3.7)  |
| Manyara                            | 335                      | (2.9)  |
| Njombe                             | 185                      | (1.6)  |
| Katavi                             | 104                      | (0.9)  |
| Simiyu                             | 415                      | (3.6)  |
| geita                              | 404                      | (3.5)  |
| Kaskazini Unguja                   | 46                       | (0.4)  |
| Kusini Unguja                      | 35                       | (0.3)  |
| Mjini Magharibi                    | 185                      | (1.6)  |
| Kaskazini Pemba                    | 46                       | (0.4)  |
| Kusini Pemba                       | 46                       | (0.4)  |
| <b>Wealth Quintile</b>             |                          |        |
| Poorest                            | 1,823                    | (15.8) |
| Poorer                             | 1,938                    | (16.8) |
| Middle                             | 2,030                    | (17.6) |
| Richer                             | 2,492                    | (21.6) |
| Richest                            | 3,253                    | (28.2) |
| <b>Occupation</b>                  |                          |        |
| Not Working                        | 2,665                    | (23.1) |
| Nonmanual                          | 1,615                    | (14.0) |
| Manual                             | 2,353                    | (20.4) |
| Agricultural                       | 4,902                    | (42.5) |
| <b>Media Exposure</b>              |                          |        |
| Not Exposed                        | 1,661                    | (14.4) |
| Exposed to one media source        | 2,930                    | (25.4) |
| Exposed to two media sources       | 3,380                    | (29.3) |
| Exposed to three media sources     | 3,564                    | (30.9) |
| <b>Hormonal Contraceptives use</b> |                          |        |
| No                                 | 8,963                    | (77.7) |
| Yes                                | 2,572                    | (22.3) |

**Table S30:** Descriptive statistics for the study population in Zimbabwe.

| <b>Variable</b>            | <b>Sample Size n (%)</b> |        |
|----------------------------|--------------------------|--------|
| <b>Sample Size</b>         | 8,721                    | (100)  |
| <b>Nutritional status</b>  |                          |        |
| Underweight                | 541                      | (6.2)  |
| Normal Weight              | 5,145                    | (59.0) |
| Overweight/Obesity         | 3,035                    | (34.8) |
| <b>Age</b>                 |                          |        |
| 15-19                      | 1,980                    | (22.7) |
| 20-24                      | 1,404                    | (16.1) |
| 25-29                      | 1,395                    | (16.0) |
| 30-34                      | 1,378                    | (15.8) |
| 35-39                      | 1,108                    | (12.7) |
| 40-44                      | 916                      | (10.5) |
| 45-49                      | 541                      | (6.2)  |
| <b>Religion</b>            |                          |        |
| Catholic                   | 602                      | (6.9)  |
| Other Christians           | 7,622                    | (87.4) |
| Islam                      | 26                       | (0.3)  |
| Traditionalists            | 52                       | (0.6)  |
| No Religion                | 419                      | (4.8)  |
| <b>Parity</b>              |                          |        |
| 0                          | 2,390                    | (27.4) |
| 1                          | 1,282                    | (14.7) |
| 2                          | 1,544                    | (17.7) |
| 3                          | 1,456                    | (16.7) |
| 4                          | 985                      | (11.3) |
| 5                          | 523                      | (6.0)  |
| 6+                         | 541                      | (6.2)  |
| <b>Marital Status</b>      |                          |        |
| Single                     | 2,381                    | (27.3) |
| Married                    | 5,137                    | (58.9) |
| Formerly Married           | 1,203                    | (13.8) |
| <b>Residential Setting</b> |                          |        |
| Rural                      | 5,381                    | (61.7) |
| Urban                      | 3,340                    | (38.3) |
| <b>Region</b>              |                          |        |
| Manicaland                 | 1,099                    | (12.6) |
| Mashonaland Central        | 759                      | (8.7)  |
| Mashonaland East           | 846                      | (9.7)  |
| Mashonaland West           | 1,020                    | (11.7) |
| Matabeleland North         | 419                      | (4.8)  |
| Matabeleland South         | 366                      | (4.2)  |
| Midlands                   | 1,099                    | (12.6) |
| Masvingo                   | 1,047                    | (12.0) |
| Harare                     | 1,552                    | (17.8) |
| Bulawayo                   | 515                      | (5.9)  |
| <b>Level of Education</b>  |                          |        |
| No Education               | 105                      | (1.2)  |
| Primary                    | 2,250                    | (25.8) |
| Secondary                  | 5,730                    | (65.7) |
| Higher                     | 637                      | (7.3)  |

| <b>Variable</b>                    | <b>Sample Size n (%)</b> |        |
|------------------------------------|--------------------------|--------|
| <b>Wealth Quintile</b>             |                          |        |
| Poorest                            | 1,474                    | (16.9) |
| Poorer                             | 1,474                    | (16.9) |
| Middle                             | 1,570                    | (18.0) |
| Richer                             | 1,980                    | (22.7) |
| Richest                            | 2,224                    | (25.5) |
| <b>Occupation</b>                  |                          |        |
| Not Working                        | 4,247                    | (48.7) |
| Nonmanual                          | 3,305                    | (37.9) |
| Manual                             | 253                      | (2.9)  |
| Agricultural                       | 820                      | (9.4)  |
| Others                             | 96                       | (1.1)  |
| <b>Media Exposure</b>              |                          |        |
| Not Exposed                        | 2,058                    | (23.6) |
| Exposed to one media source        | 2,398                    | (27.5) |
| Exposed to two media sources       | 2,363                    | (27.1) |
| Exposed to three media sources     | 1,901                    | (21.8) |
| <b>Hormonal Contraceptives use</b> |                          |        |
| No                                 | 4,718                    | (54.1) |
| Yes                                | 4,003                    | (45.9) |

**Table S31:** Descriptive statistics for the study population in Gabon.

| <b>Variable</b>            | <b>Sample Size n (%)</b> |        |
|----------------------------|--------------------------|--------|
| <b>Total Sample Size</b>   | 4,213                    | (100)  |
| <b>Nutritional status</b>  |                          |        |
| Underweight                | 333                      | (7.9)  |
| Normal Weight              | 2,157                    | (51.2) |
| Overweight/Obesity         | 1,723                    | (40.9) |
| <b>Age</b>                 |                          |        |
| 15-19                      | 948                      | (22.5) |
| 20-24                      | 750                      | (17.8) |
| 25-29                      | 653                      | (15.5) |
| 30-34                      | 594                      | (14.1) |
| 35-39                      | 510                      | (12.1) |
| 40-44                      | 417                      | (9.9)  |
| 45-49                      | 341                      | (8.1)  |
| <b>Ethnicity</b>           |                          |        |
| Shira-Punu/Vili            | 994                      | (23.6) |
| Fang                       | 1,222                    | (29.0) |
| Kota-Kele                  | 286                      | (6.8)  |
| Mbede-Teke                 | 354                      | (8.4)  |
| Myene                      | 303                      | (7.2)  |
| Nzabi-Duma                 | 598                      | (14.2) |
| Okande-Tsogho              | 105                      | (2.5)  |
| Pygmees                    | 21                       | (0.5)  |
| Other                      | 329                      | (7.8)  |
| <b>Religion</b>            |                          |        |
| Catholic                   | 1,786                    | (42.4) |
| Other Christians           | 2,132                    | (50.6) |
| Others                     | 72                       | (1.7)  |
| No Religion                | 223                      | (5.3)  |
| <b>Parity</b>              |                          |        |
| 0                          | 1192                     | (28.3) |
| 1                          | 809                      | (19.2) |
| 2                          | 632                      | (15.0) |
| 3                          | 447                      | (10.6) |
| 4                          | 362                      | (8.6)  |
| 5                          | 206                      | (4.9)  |
| 6+                         | 565                      | (13.4) |
| <b>Marital Status</b>      |                          |        |
| Single                     | 1,622                    | (38.5) |
| Married                    | 2,052                    | (48.7) |
| Formerly Married           | 539                      | (12.8) |
| <b>Residential Setting</b> |                          |        |
| Rural                      | 543                      | (12.9) |
| Urban                      | 3,670                    | (87.1) |



| <b>Variable</b>                    | <b>Sample Size n (%)</b> |        |
|------------------------------------|--------------------------|--------|
| <b>Region</b>                      |                          |        |
| Estuaire                           | 472                      | (11.2) |
| Libreville-Port-Gentil             | 2,313                    | (54.9) |
| Haut-Ogooué                        | 409                      | (9.7)  |
| Moyen-Ogooué                       | 135                      | (3.2)  |
| Ngounié                            | 265                      | (6.3)  |
| Nyanga                             | 105                      | (2.5)  |
| Ogooué Maritime                    | 46                       | (1.1)  |
| Ogooué-Ivindo                      | 139                      | (3.3)  |
| Ogooué-Lolo                        | 143                      | (3.4)  |
| Woleu-N'tem                        | 185                      | (4.4)  |
| <b>Level of Education</b>          |                          |        |
| No Education                       | 55                       | (1.3)  |
| Primary                            | 944                      | (22.4) |
| Secondary                          | 2,802                    | (66.5) |
| Higher                             | 413                      | (9.8)  |
| <b>Wealth Quintile</b>             |                          |        |
| Poorest                            | 674                      | (16.0) |
| Poorer                             | 784                      | (18.6) |
| Middle                             | 923                      | (21.9) |
| Richer                             | 817                      | (19.4) |
| Richest                            | 1,015                    | (24.1) |
| <b>Occupation</b>                  |                          |        |
| Not Working                        | 2,212                    | (52.5) |
| Nonmanual                          | 1,584                    | (37.6) |
| Manual                             | 185                      | (4.4)  |
| Agricultural                       | 232                      | (5.5)  |
| <b>Media Exposure</b>              |                          |        |
| Not Exposed                        | 177                      | (4.2)  |
| Exposed to one media source        | 881                      | (20.9) |
| Exposed to two media sources       | 1,496                    | (35.5) |
| Exposed to three media sources     | 1,660                    | (39.4) |
| <b>Hormonal Contraceptives use</b> |                          |        |
| No                                 | 4,036                    | (95.8) |
| Yes                                | 177                      | (4.2)  |

**Table S32:** Descriptive statistics for the study population in Ghana.

| <b>Variable</b>            | <b>Sample Size n (%)</b> |        |
|----------------------------|--------------------------|--------|
| <b>Total Sample Size</b>   | 4,238                    | (100)  |
| <b>Nutritional status</b>  |                          |        |
| Underweight                | 263                      | (6.2)  |
| Normal Weight              | 2,276                    | (53.7) |
| Overweight/Obesity         | 1,699                    | (40.1) |
| <b>Age</b>                 |                          |        |
| 15-19                      | 780                      | (18.4) |
| 20-24                      | 699                      | (16.5) |
| 25-29                      | 674                      | (15.9) |
| 30-34                      | 602                      | (14.2) |
| 35-39                      | 576                      | (13.6) |
| 40-44                      | 492                      | (11.6) |
| 45-49                      | 415                      | (9.8)  |
| <b>Ethnicity</b>           |                          |        |
| Akan                       | 2,170                    | (51.2) |
| Ga/Dangme                  | 335                      | (7.9)  |
| Ewe                        | 559                      | (13.2) |
| Guan                       | 106                      | (2.5)  |
| Mole-Dagbani               | 593                      | (14.0) |
| Grusi                      | 119                      | (2.8)  |
| Gurma                      | 242                      | (5.7)  |
| Mande                      | 34                       | (0.8)  |
| Others                     | 81                       | (1.9)  |
| <b>Religion</b>            |                          |        |
| Catholics                  | 445                      | (10.5) |
| Other Christians           | 2,971                    | (70.1) |
| Islam                      | 636                      | (15.0) |
| Traditionalist             | 89                       | (2.1)  |
| No Religion                | 97                       | (2.3)  |
| <b>Parity</b>              |                          |        |
| 0                          | 1,382                    | (32.6) |
| 1                          | 555                      | (13.1) |
| 2                          | 559                      | (13.2) |
| 3                          | 504                      | (11.9) |
| 4                          | 411                      | (9.7)  |
| 5                          | 314                      | (7.4)  |
| 6+                         | 513                      | (12.1) |
| <b>Marital Status</b>      |                          |        |
| Single                     | 1,458                    | (34.4) |
| Married                    | 2,293                    | (54.1) |
| Formerly Married           | 487                      | (11.5) |
| <b>Residential Setting</b> |                          |        |
| Rural                      | 1907                     | (45.0) |
| Urban                      | 2331                     | (55.0) |

| <b>Variable</b>                    | <b>Sample Size n (%)</b> |        |
|------------------------------------|--------------------------|--------|
| <b>Region</b>                      |                          |        |
| Western                            | 500                      | (11.8) |
| Central                            | 428                      | (10.1) |
| Greater Accra                      | 877                      | (20.7) |
| Volta                              | 322                      | (7.6)  |
| Eastern                            | 373                      | (8.8)  |
| Ashanti                            | 767                      | (18.1) |
| Brong Ahafo                        | 348                      | (8.2)  |
| Northern                           | 364                      | (8.6)  |
| Upper East                         | 161                      | (3.8)  |
| Upper West                         | 97                       | (2.3)  |
| <b>Level of Education</b>          |                          |        |
| No Education                       | 797                      | (18.8) |
| Primary                            | 771                      | (18.2) |
| Secondary                          | 2,420                    | (57.1) |
| Higher                             | 250                      | (5.9)  |
| <b>Wealth Quintile</b>             |                          |        |
| Poorest                            | 699                      | (16.5) |
| Poorer                             | 720                      | (17.0) |
| Middle                             | 882                      | (20.8) |
| Richer                             | 954                      | (22.5) |
| Richest                            | 983                      | (23.2) |
| <b>Occupation</b>                  |                          |        |
| Not Working                        | 987                      | (23.3) |
| Nonmanual                          | 1,924                    | (45.4) |
| Manual                             | 542                      | (12.8) |
| Agricultural                       | 784                      | (18.5) |
| <b>Media Exposure</b>              |                          |        |
| Not Exposed                        | 318                      | (7.5)  |
| Exposed to one media source        | 949                      | (22.4) |
| Exposed to two media sources       | 2,272                    | (53.6) |
| Exposed to three media sources     | 699                      | (16.5) |
| <b>Hormonal Contraceptives use</b> |                          |        |
| No                                 | 3,585                    | (84.6) |
| Yes                                | 653                      | (15.4) |

**Table S33:** Descriptive statistics for study population in Lesotho.

| <b>Variable</b>            | <b>Sample Size n (%)</b> |        |
|----------------------------|--------------------------|--------|
| <b>Total Sample Size</b>   | 3,157                    | (100)  |
| <b>Nutritional status</b>  |                          |        |
| Underweight                | 136                      | (4.3)  |
| Normal Weight              | 1,620                    | (51.3) |
| Overweight/Obesity         | 1,402                    | (44.4) |
| <b>Age</b>                 |                          |        |
| 15-19                      | 695                      | (22.0) |
| 20-24                      | 603                      | (19.1) |
| 25-29                      | 515                      | (16.3) |
| 30-34                      | 455                      | (14.4) |
| 35-39                      | 344                      | (10.9) |
| 40-44                      | 290                      | (9.2)  |
| 45-49                      | 256                      | (8.1)  |
| <b>Religion</b>            |                          |        |
| Catholic                   | 1,250                    | (39.6) |
| Other Christians           | 1,856                    | (58.8) |
| Other                      | 51                       | (1.6)  |
| <b>Parity</b>              |                          |        |
| 0                          | 957                      | (30.3) |
| 1                          | 691                      | (21.9) |
| 2                          | 606                      | (19.2) |
| 3                          | 388                      | (12.3) |
| 4                          | 230                      | (7.3)  |
| 5                          | 139                      | (4.4)  |
| 6+                         | 145                      | (4.6)  |
| <b>Marital Status</b>      |                          |        |
| Single                     | 1,070                    | (33.9) |
| Married                    | 1,667                    | (52.8) |
| Formerly Married           | 420                      | (13.3) |
| <b>Residential Setting</b> |                          |        |
| Rural                      | 2,039                    | (64.6) |
| Urban                      | 1,118                    | (35.4) |
| <b>Region</b>              |                          |        |
| Maseru                     | 859                      | (27.2) |
| Botha-Bothe                | 186                      | (5.9)  |
| Leribe                     | 502                      | (15.9) |
| Berea                      | 420                      | (13.3) |
| Mafeteng                   | 268                      | (8.5)  |
| Mohale's Hoek              | 268                      | (8.5)  |
| Quthing                    | 161                      | (5.1)  |
| Qacha's-Nek                | 95                       | (3.0)  |
| Mokhotlong                 | 167                      | (5.3)  |
| Thaba Tseka                | 230                      | (7.3)  |
| <b>Level of Education</b>  |                          |        |
| No Education               | 35                       | (1.1)  |
| Primary                    | 1,241                    | (39.3) |
| Secondary                  | 1,635                    | (51.8) |
| Higher                     | 246                      | (7.8)  |

| <b>Variable</b>                    | <b>Sample Size n (%)</b> |        |
|------------------------------------|--------------------------|--------|
| <b>Wealth Quintile</b>             |                          |        |
| Poorest                            | 445                      | (14.1) |
| Poorer                             | 524                      | (16.6) |
| Middle                             | 597                      | (18.9) |
| Richer                             | 758                      | (24.0) |
| Richest                            | 833                      | (26.4) |
| <b>Media Exposure</b>              |                          |        |
| Not Exposed                        | 537                      | (17.0) |
| Exposed to one media source        | 1,017                    | (32.2) |
| Exposed to two media sources       | 947                      | (30.0) |
| Exposed to three media sources     | 657                      | (20.8) |
| <b>Hormonal Contraceptives use</b> |                          |        |
| No                                 | 2,254                    | (71.4) |
| Yes                                | 903                      | (28.6) |

**Table S34:** Descriptive statistics for the study population in Eswatini.

| <b>Variable</b>            | <b>Sample Size n (%)</b> |        |
|----------------------------|--------------------------|--------|
| <b>Sample Size</b>         | 4,402                    | (100)  |
| <b>Nutritional status</b>  |                          |        |
| Underweight                | 141                      | (3.2)  |
| Normal Weight              | 2,034                    | (46.2) |
| Overweight/Obesity         | 2,227                    | (50.6) |
| <b>Age</b>                 |                          |        |
| 15-19                      | 1,145                    | (26.0) |
| 20-24                      | 867                      | (19.7) |
| 25-29                      | 625                      | (14.2) |
| 30-34                      | 550                      | (12.5) |
| 35-39                      | 445                      | (10.1) |
| 40-44                      | 405                      | (9.2)  |
| 45-49                      | 365                      | (8.3)  |
| <b>Religion</b>            |                          |        |
| Catholic                   | 211                      | (4.8)  |
| Other Christians           | 4,001                    | (90.9) |
| Traditionalists            | 18                       | (0.4)  |
| No Religion                | 172                      | (3.9)  |
| <b>Parity</b>              |                          |        |
| 0                          | 1,351                    | (30.7) |
| 1                          | 814                      | (18.5) |
| 2                          | 643                      | (14.6) |
| 3                          | 475                      | (10.8) |
| 4                          | 321                      | (7.3)  |
| 5                          | 242                      | (5.5)  |
| 6+                         | 555                      | (12.6) |
| <b>Marital Status</b>      |                          |        |
| Single                     | 2,227                    | (50.6) |
| Married                    | 1,770                    | (40.2) |
| Formerly Married           | 405                      | (9.2)  |
| <b>Residential Setting</b> |                          |        |
| Rural                      | 3,253                    | (73.9) |
| Urban                      | 1,149                    | (26.1) |
| <b>Region</b>              |                          |        |
| Hhohho                     | 1,171                    | (26.6) |
| Manzini                    | 1,461                    | (33.2) |
| Shiselweni                 | 929                      | (21.1) |
| Lubombo                    | 841                      | (19.1) |
| <b>Level of Education</b>  |                          |        |
| No Education               | 352                      | (8.0)  |
| Primary                    | 1,431                    | (32.5) |
| Secondary                  | 2,289                    | (52.0) |
| Higher                     | 330                      | (7.5)  |
| <b>Wealth Quintile</b>     |                          |        |
| Poorest                    | 687                      | (15.6) |
| Poorer                     | 744                      | (16.9) |
| Middle                     | 867                      | (19.7) |
| Richer                     | 995                      | (22.6) |
| Richest                    | 1,109                    | (25.2) |

| <b>Variable</b>                    | <b>Sample Size n (%)</b> |        |
|------------------------------------|--------------------------|--------|
| <b>Occupation</b>                  |                          |        |
| Not Working                        | 2,483                    | (56.4) |
| Nonmanual                          | 1,448                    | (32.9) |
| Manual                             | 299                      | (6.8)  |
| Agricultural                       | 172                      | (3.9)  |
| <b>Media Exposure</b>              |                          |        |
| Not Exposed                        | 409                      | (9.3)  |
| Exposed to one media source        | 1,052                    | (23.9) |
| Exposed to two media sources       | 1,576                    | (35.8) |
| Exposed to three media sources     | 1,365                    | (31.0) |
| <b>Hormonal Contraceptives use</b> |                          |        |
| No                                 | 3,561                    | (80.9) |
| Yes                                | 841                      | (19.1) |

### Appendix 3: Random forest box plots for individual-level analyses (Figures S4 -S37).

1. The box plots present a summary of the individual level predictors for nutritional status i.e. both underweight (BMI <18.5 kg/m<sup>2</sup>) and overweight/obesity (BMI ≥ 25.0 kg/m<sup>2</sup>) among women of child-bearing age for each country.
2. Variables to the right of the dashed line (absolute value of the lowest ranking variable) are the most influential predictors for the individual's nutritional status, ranked based on the relative importance score.
3. Presented alongside the figure caption is the Out-of-Bag error (OOB Error), used as goodness of fit statistic for the model.

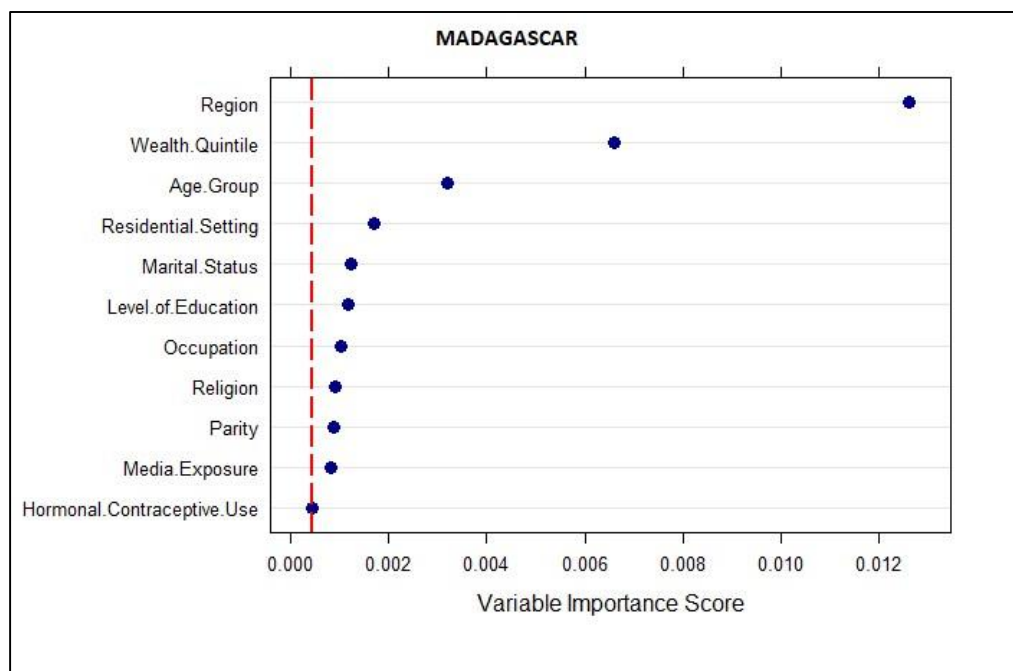

**Figure S4:** Predictors for nutritional status in Madagascar (OOB error = 29.0%).



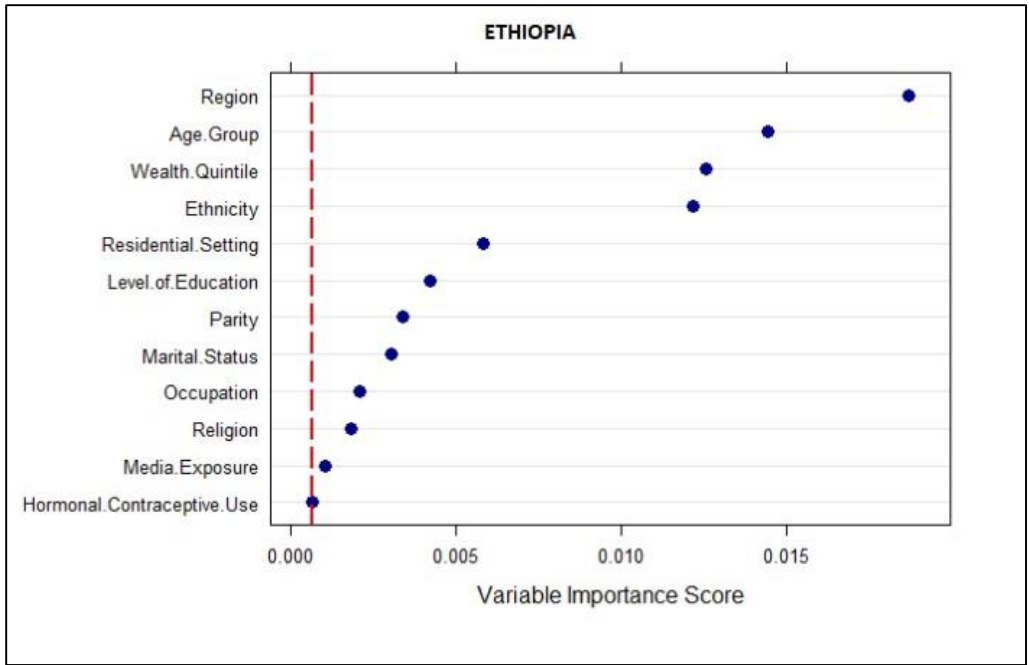

**Figure S5:** Predictors for nutritional status in Ethiopia (OOB error = 30.5%).

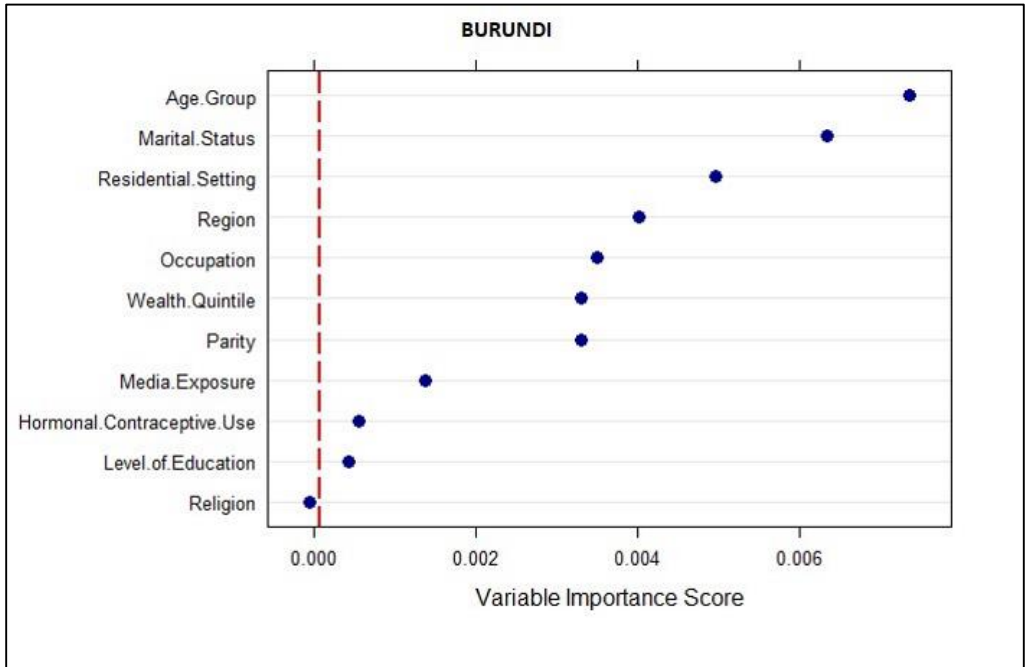

**Figure S6:** Predictors for nutritional status in Burundi (OOB error = 24.1%).

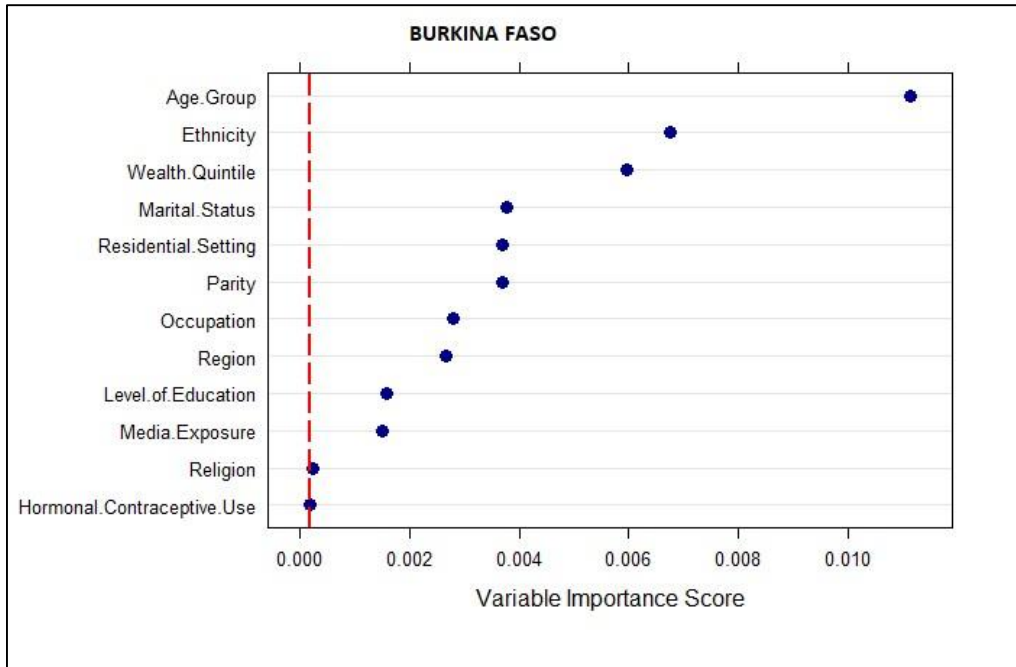

**Figure S7:** Predictors for nutritional status in Burkina Faso (OOB error = 22.8%).

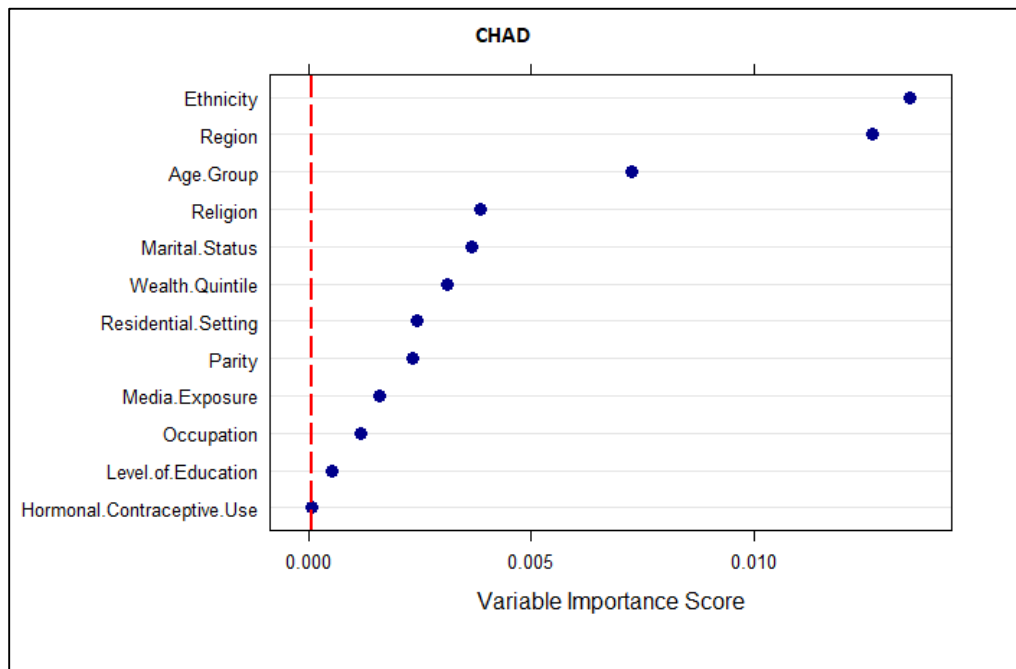

**Figure S8:** Predictors for nutritional status in Chad (OOB error = 27.4%).

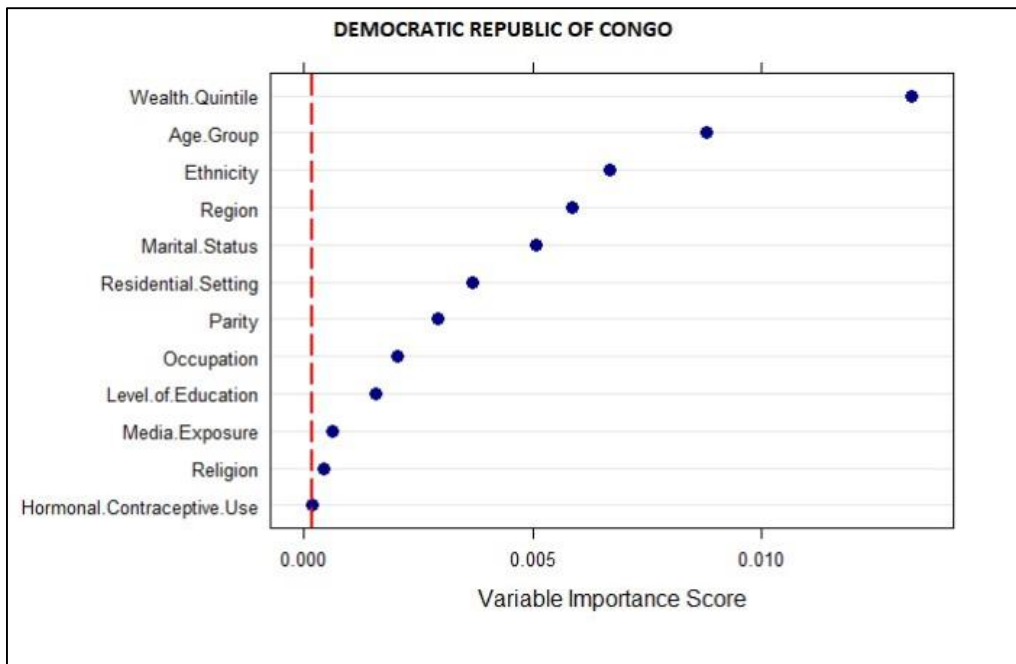

**Figure S9:** Predictors for nutritional status in D R Congo (OOB error = 29.0%).

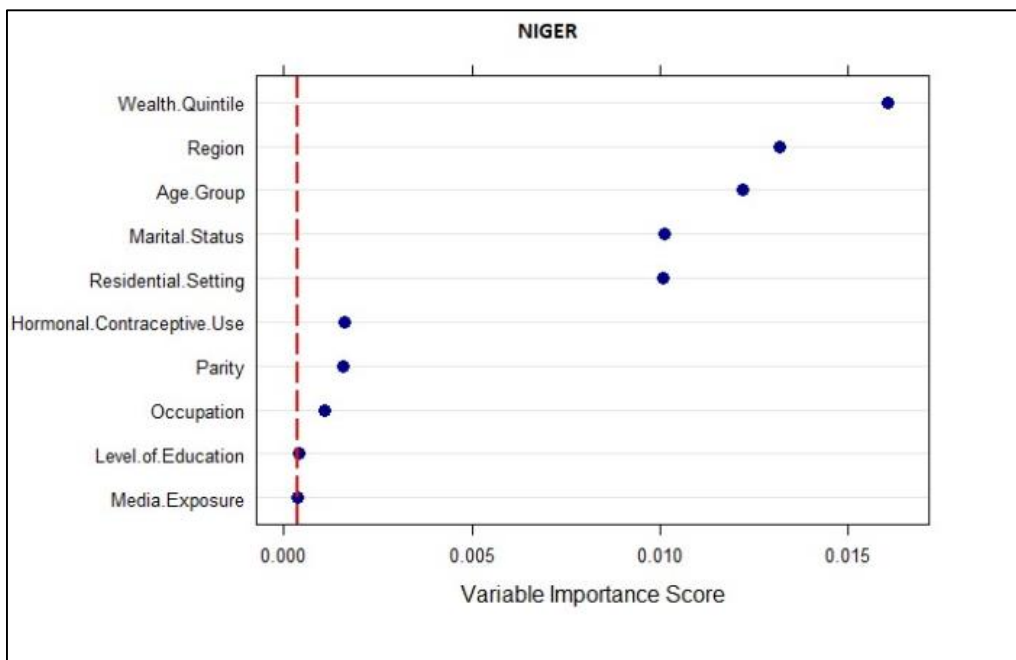

**Figure S10:** Predictors for nutritional status in Niger (OOB error = 29.3%).

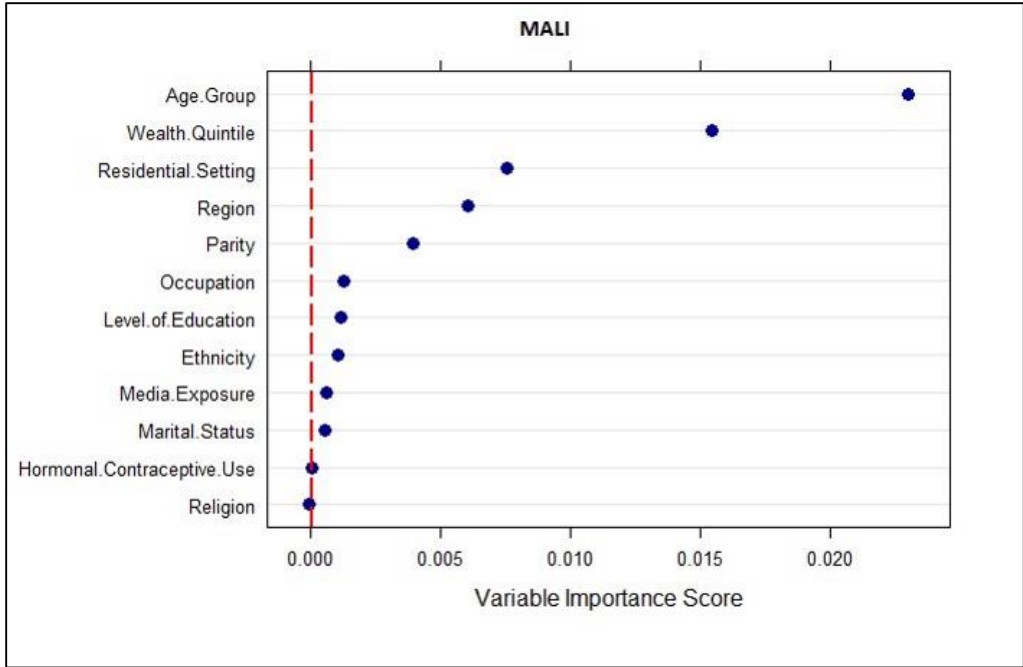

**Figure S11:** Predictors for nutritional status in Mali (OOB error = 26.4%).

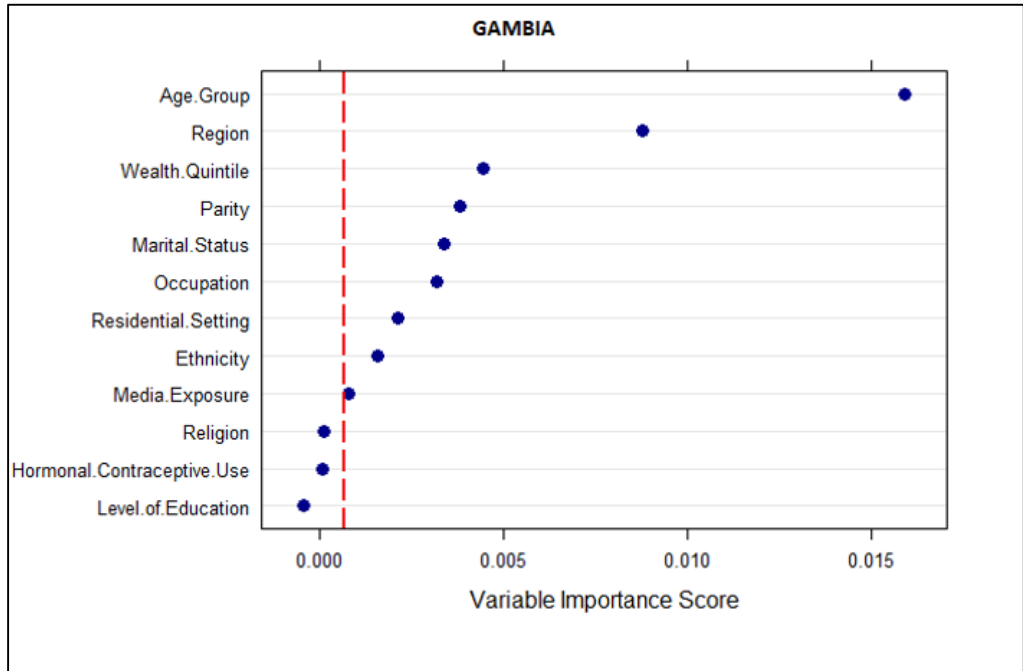

**Figure S12:** Predictors for nutritional status in Gambia (OOB error = 34.0%).

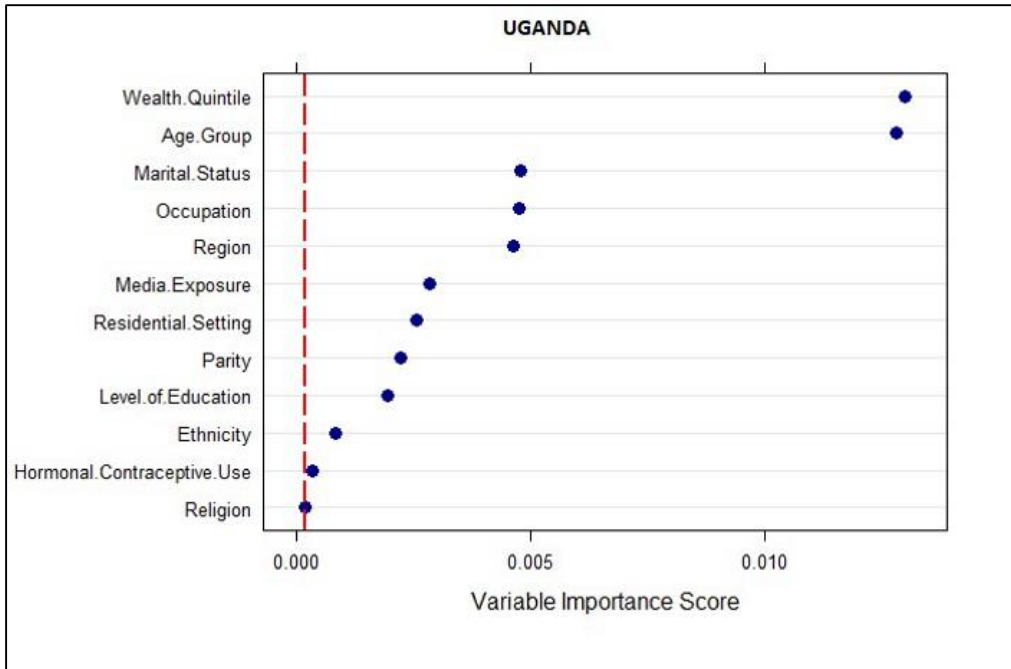

**Figure S13:** Predictors for nutritional status in Uganda (OOB error = 27.2%).

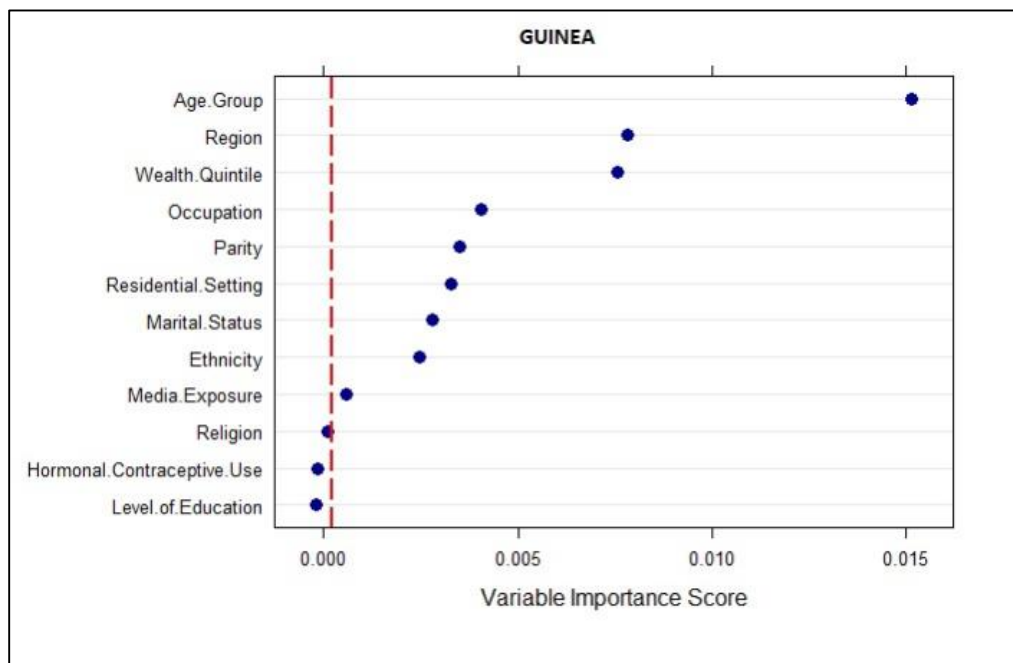

**Figure S14:** Predictors for nutritional status in Guinea (OOB error = 27.4%).

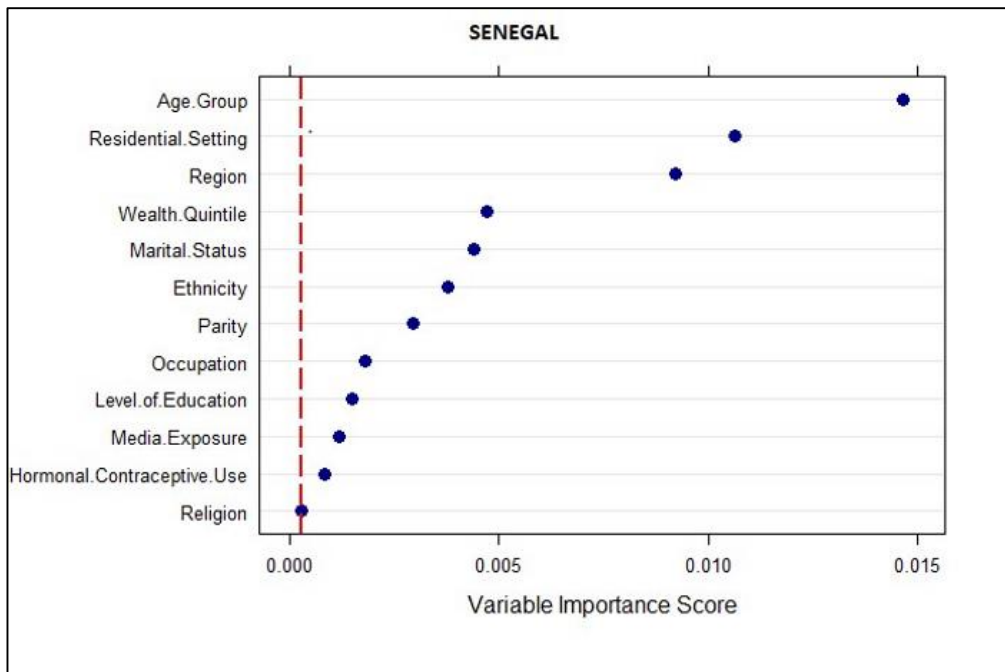

**Figure S15:** Predictors for nutritional status in Senegal (OOB error = 33.5%).

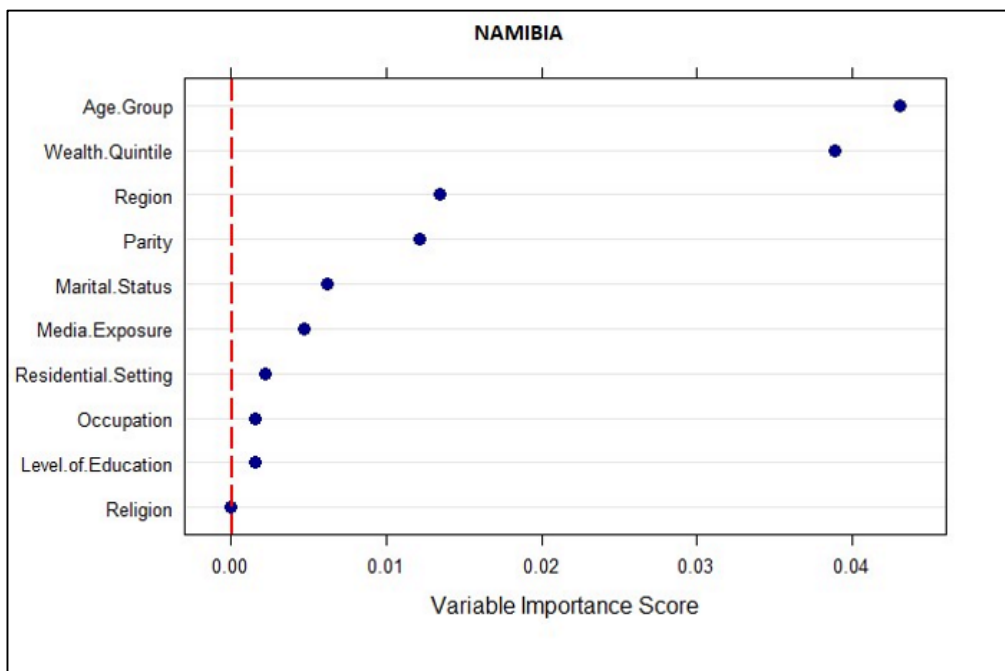

**Figure S16:** Predictors for nutritional status in Namibia (OOB error = 30.0%).

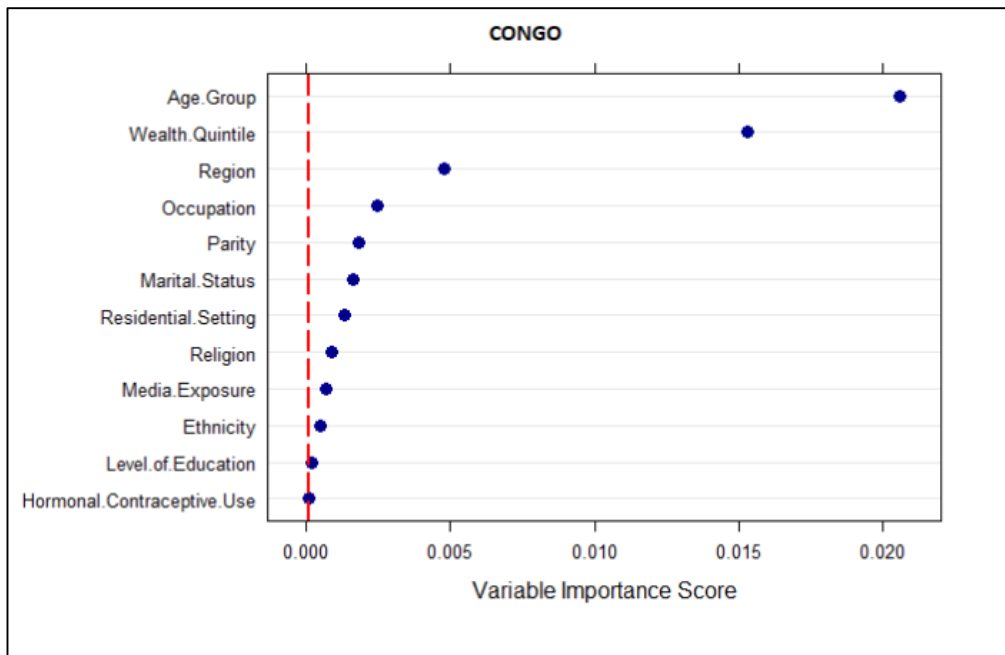

**Figure S17:** Predictors for nutritional status in Congo (OOB error = 28.6%).

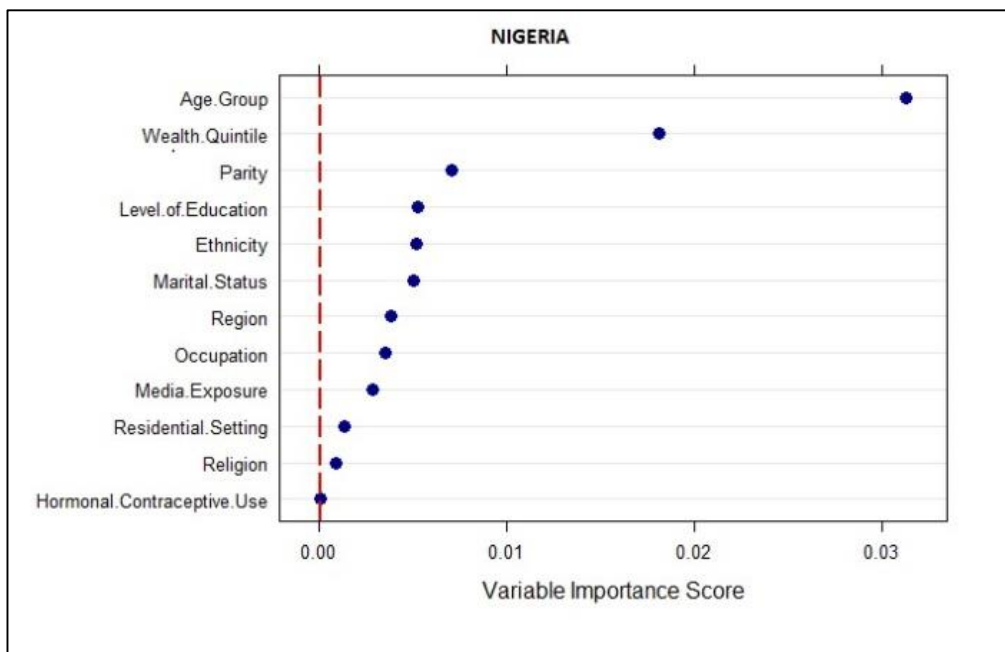

**Figure S18:** Predictors for nutritional status in Nigeria (OOB error = 27.7%).

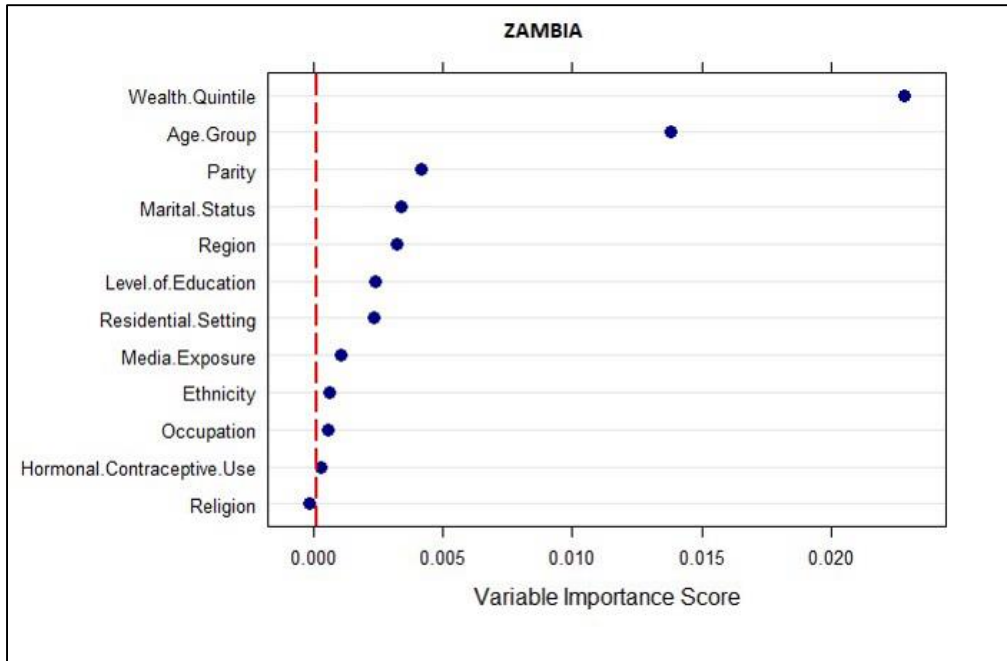

**Figure S19:** Predictors for nutritional status in Zambia (OOB error = 25.7%).

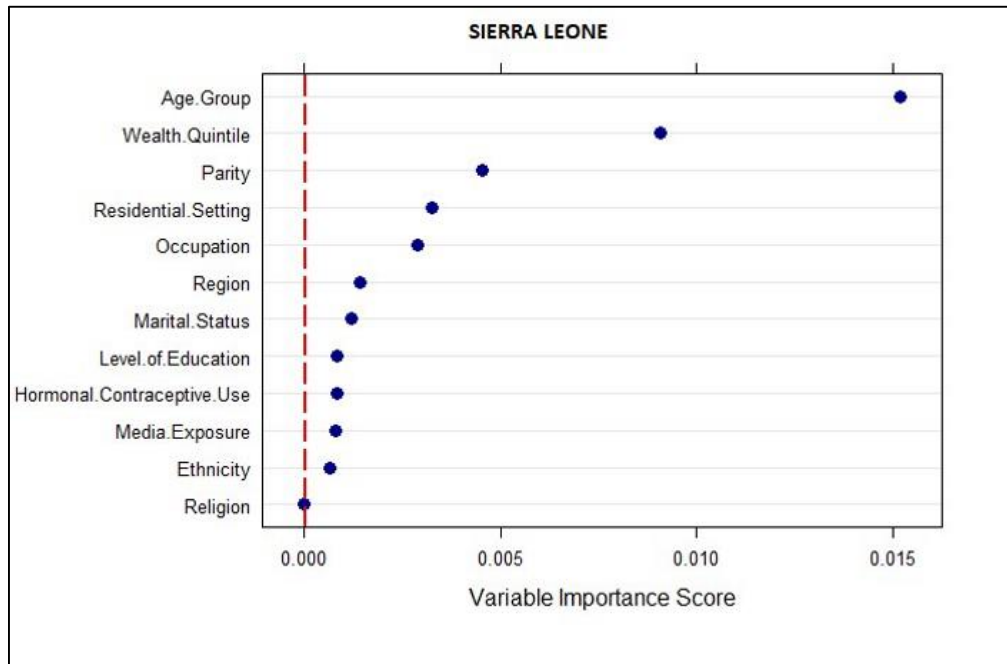

**Figure S20:** Predictors for nutritional status in Sierra Leone (OOB error = 24.9%).



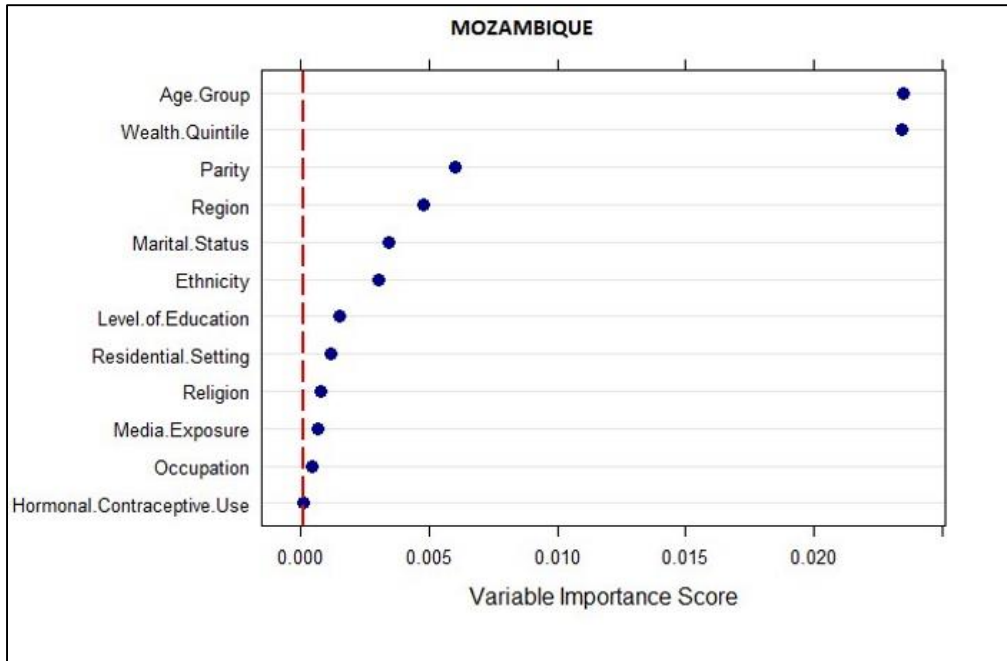

**Figure S21:** Predictors for nutritional status in Mozambique (OOB error = 22.7%).

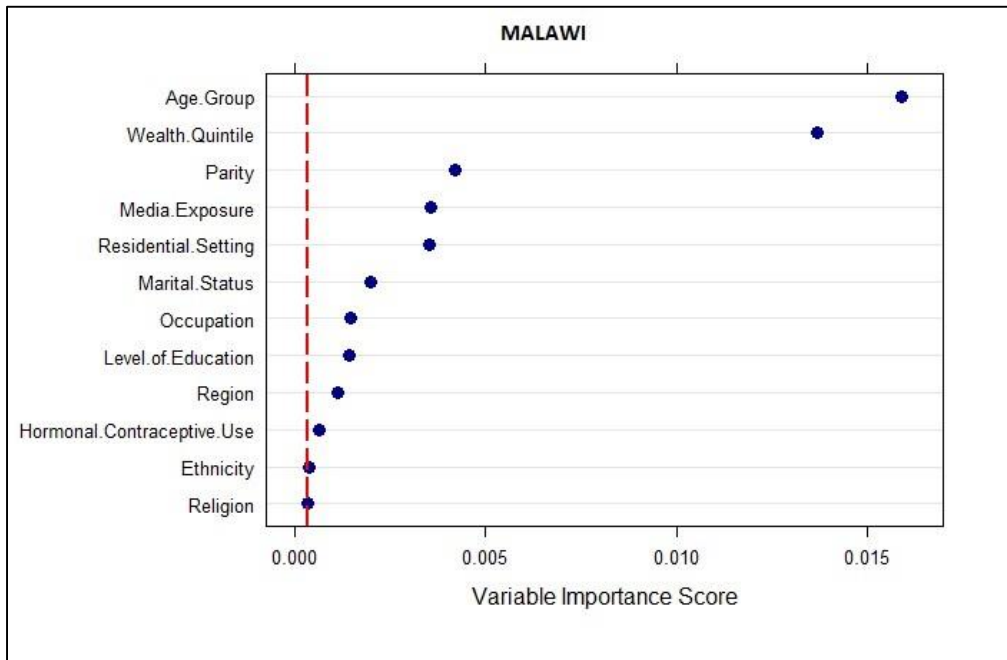

**Figure S22:** Predictors for nutritional status in Malawi (OOB error = 23.4%).

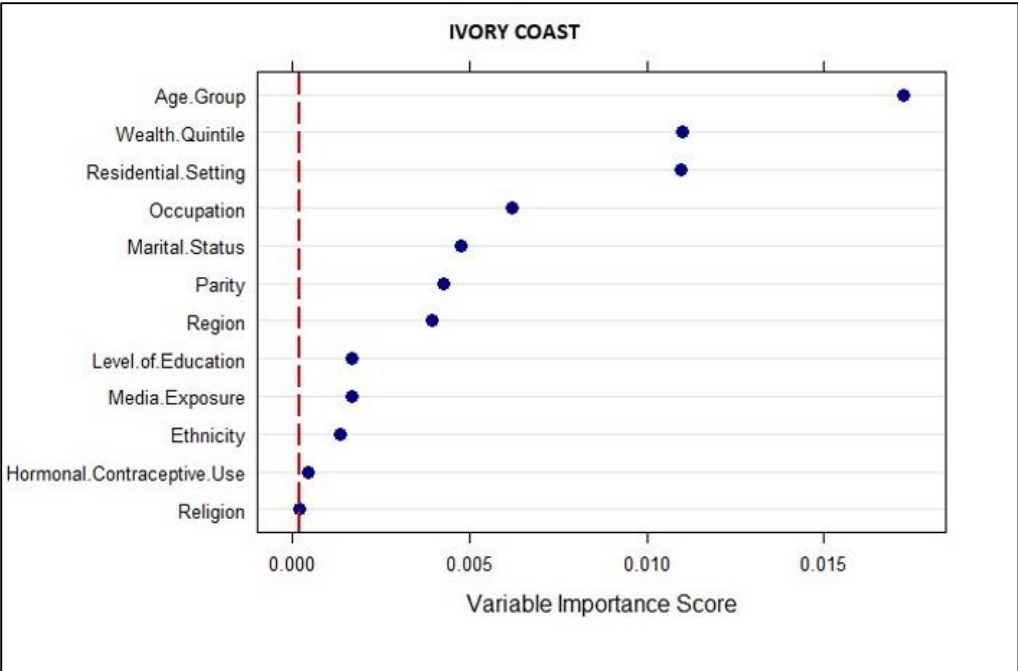

**Figure S23:** Predictors for nutritional status in Ivory Coast (OOB error = 24.5%).

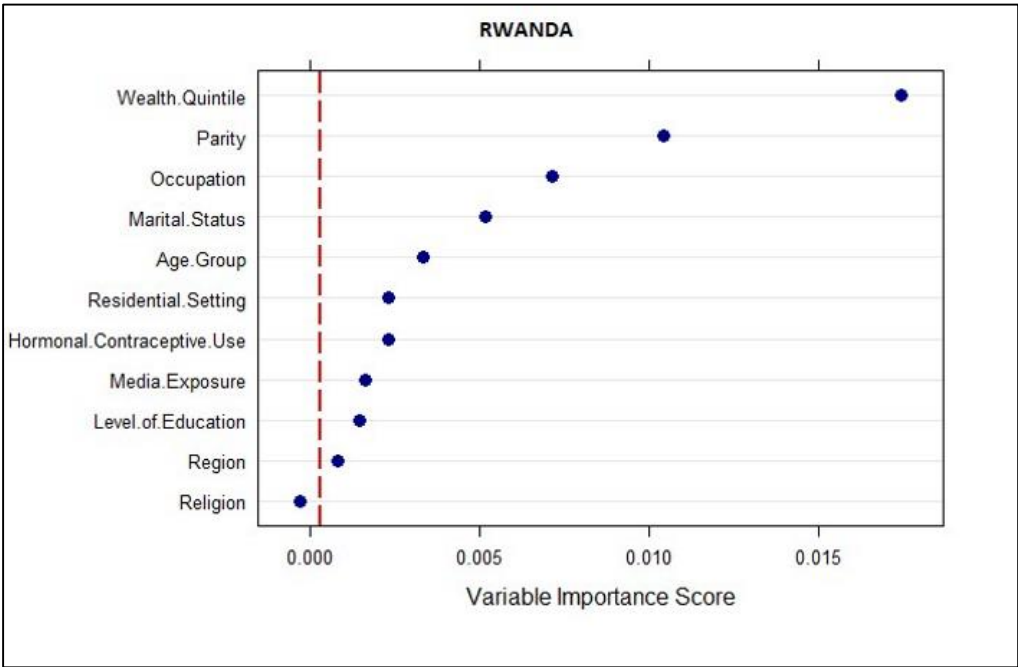

**Figure S24:** Predictors for nutritional status in Rwanda (OOB error = 24.2%).

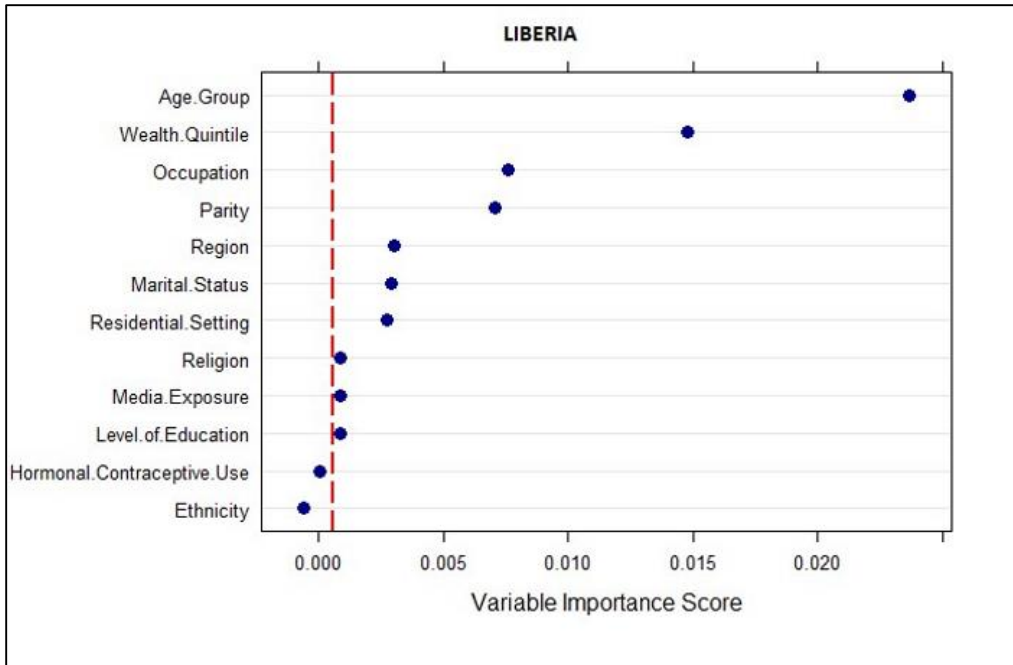

**Figure S25:** Predictors for nutritional status in Liberia (OOB error = 25.5%).

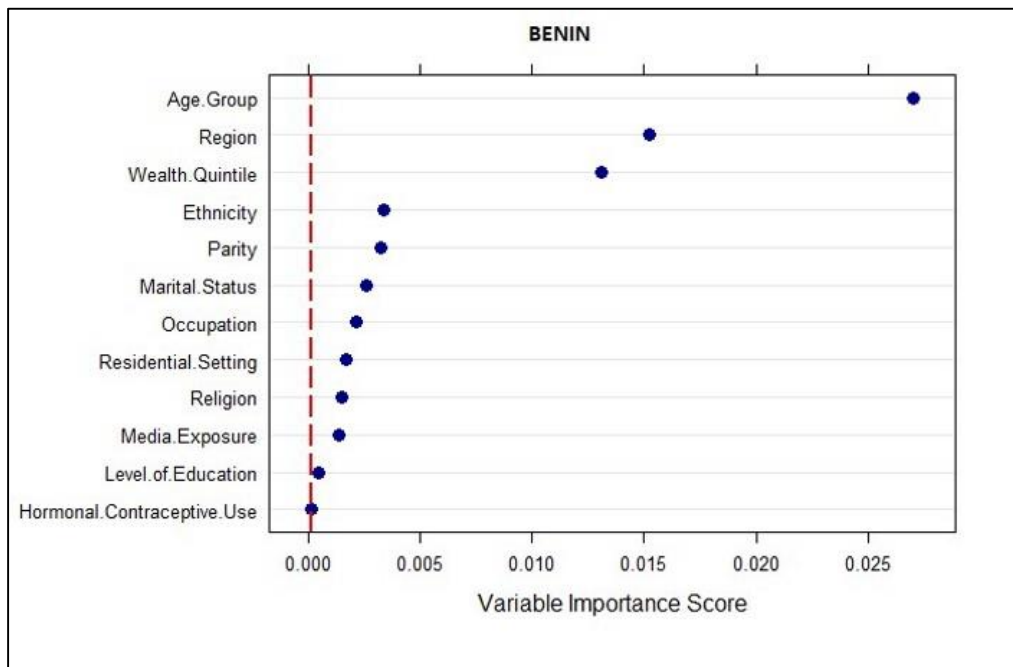

**Figure S26:** Predictors for nutritional status in Benin (OOB error = 24.5%).

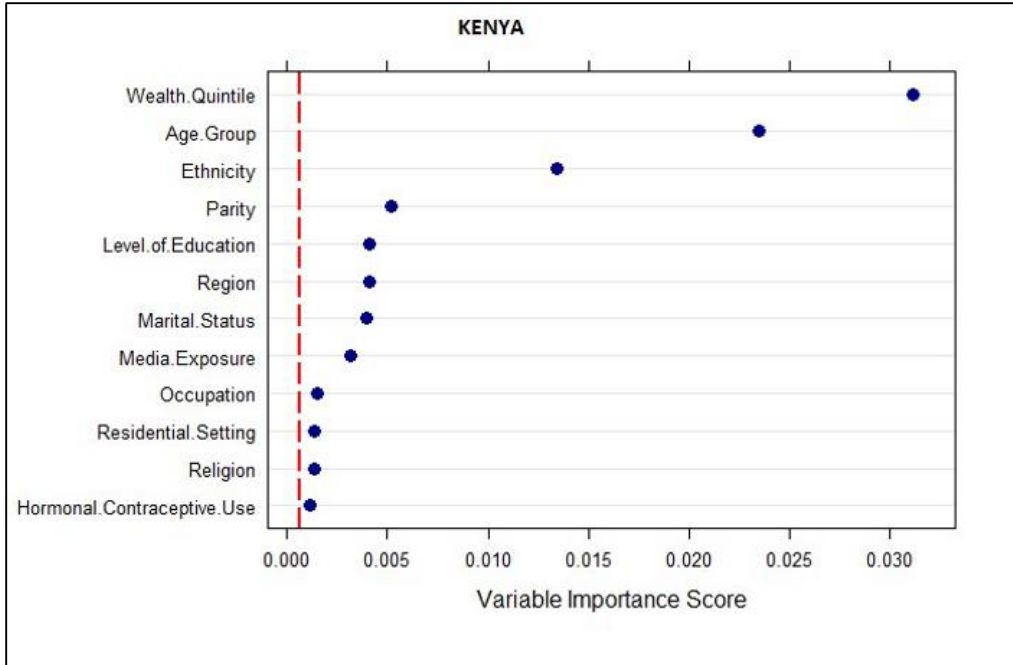

**Figure S27:** Predictors for nutritional status in Kenya (OOB error = 28.8%).

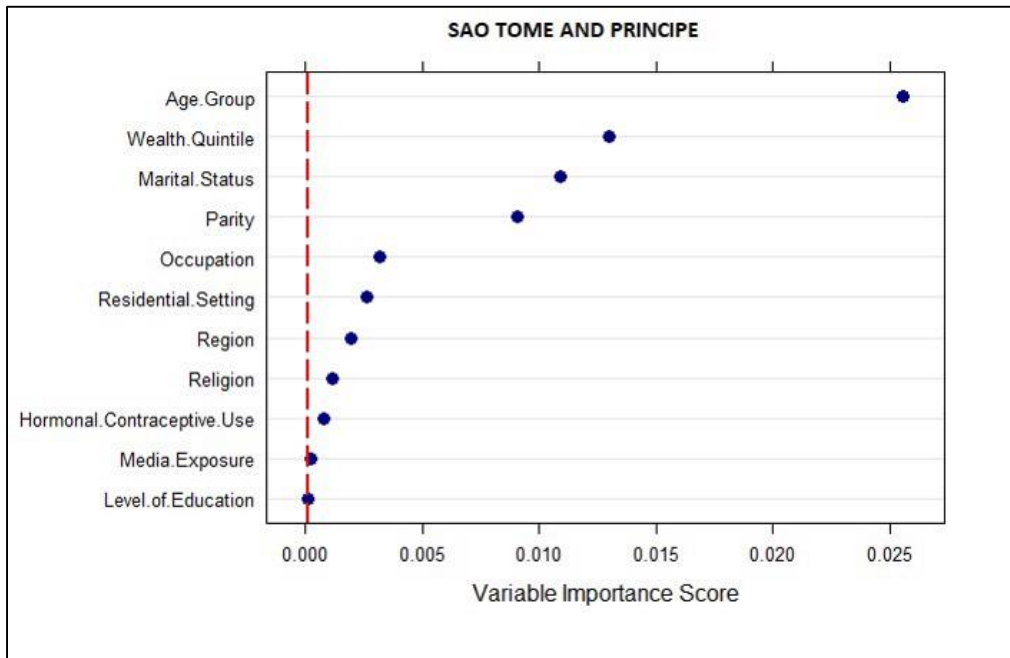

**Figure S28:** Predictors for nutritional status in Sao Tome and Principe (OOB error = 28.5%).

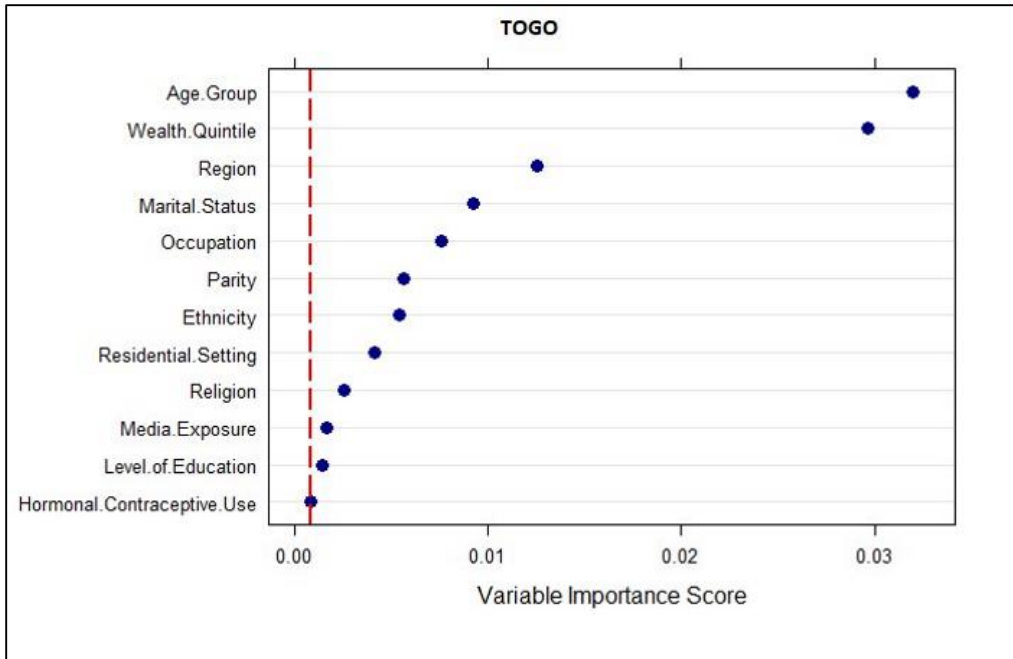

**Figure S29:** Predictors for nutritional status in Togo (OOB error = 24.7%).

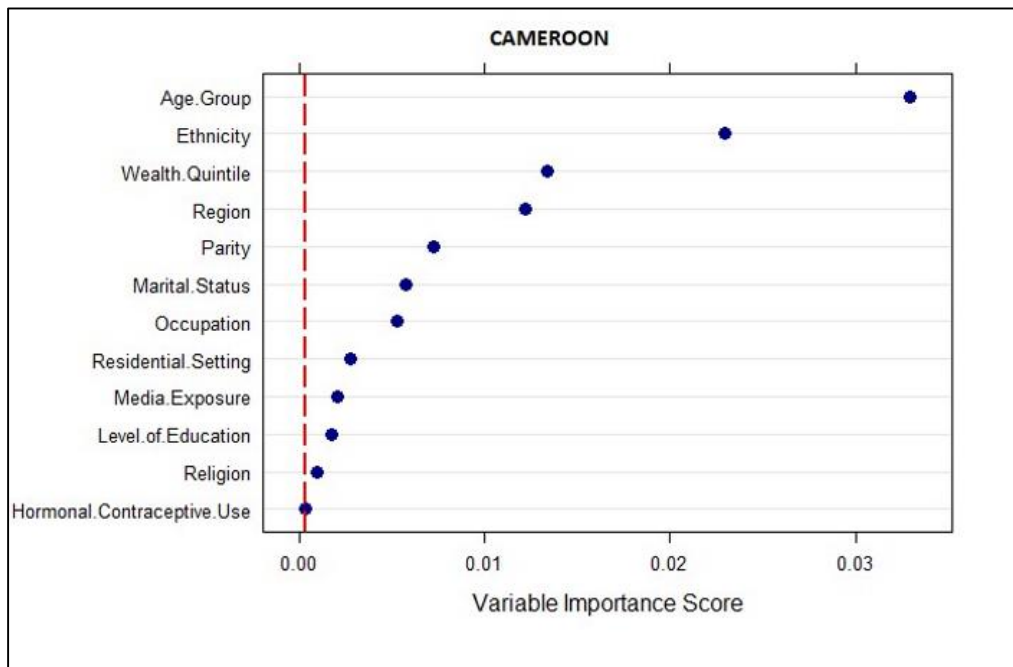

**Figure S30:** Predictors for nutritional status in Cameroon (OOB error = 24.9%).

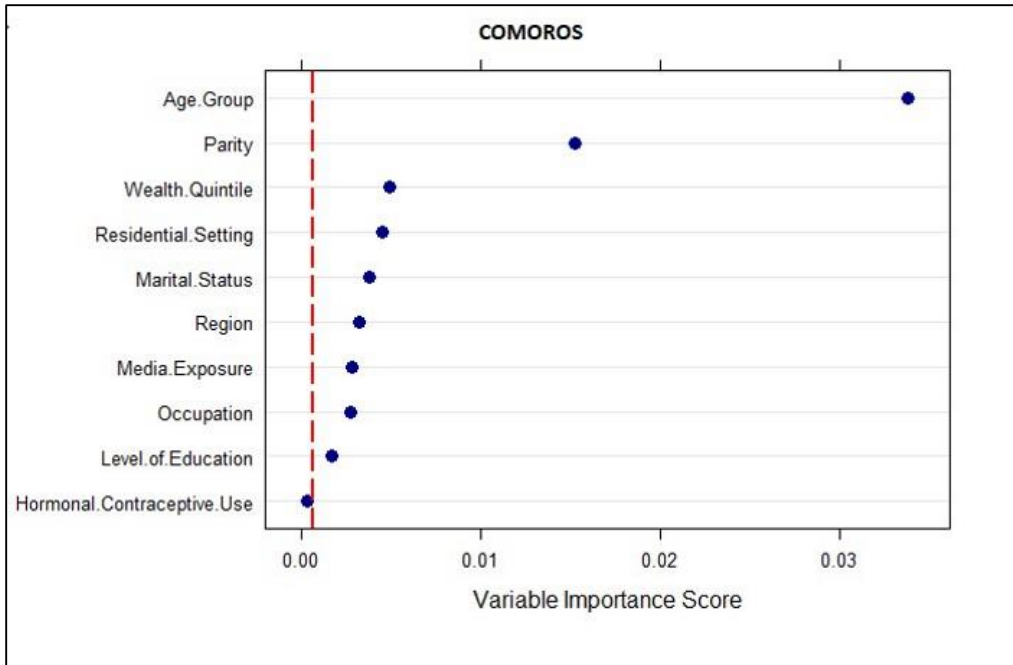

**Figure S31:** Predictors for nutritional status in Comoros (OOB error = 28.9%).

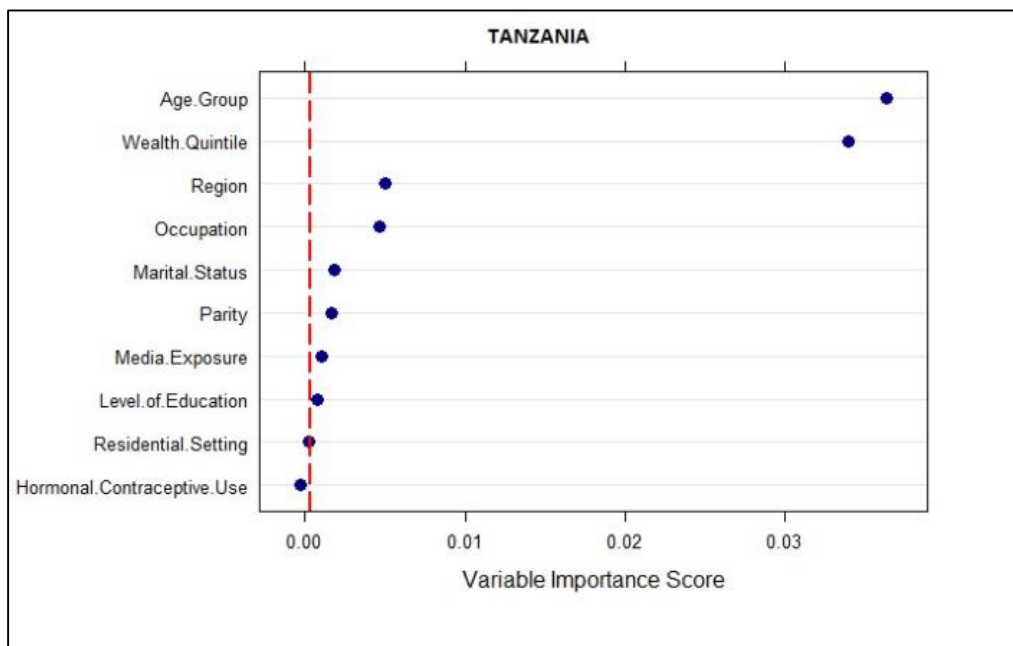

**Figure S32:** Predictors for nutritional status in Tanzania (OOB error = 26.6%).

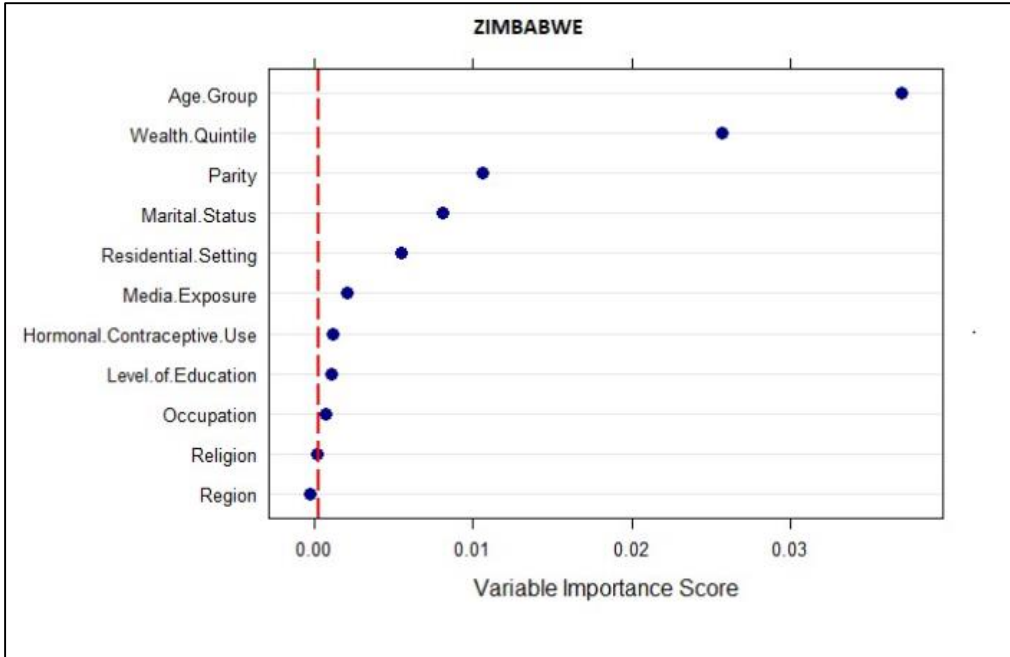

**Figure S33:** Predictors for nutritional status in Zimbabwe (OOB error = 28.1%).

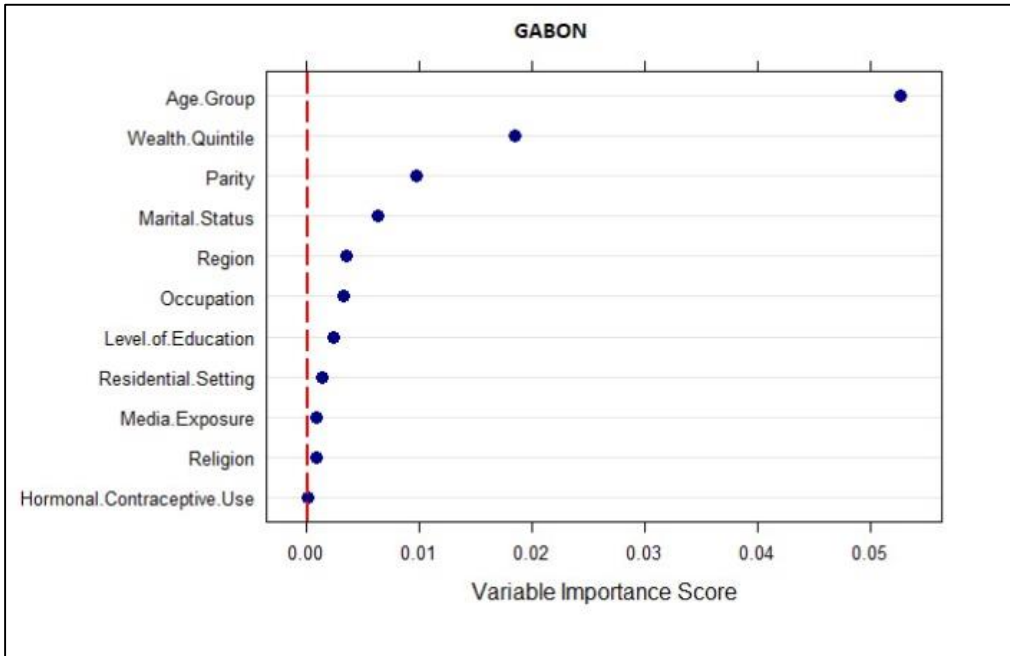

**Figure S34:** Predictors for nutritional status in Gabon (OOB error = 27.8%).

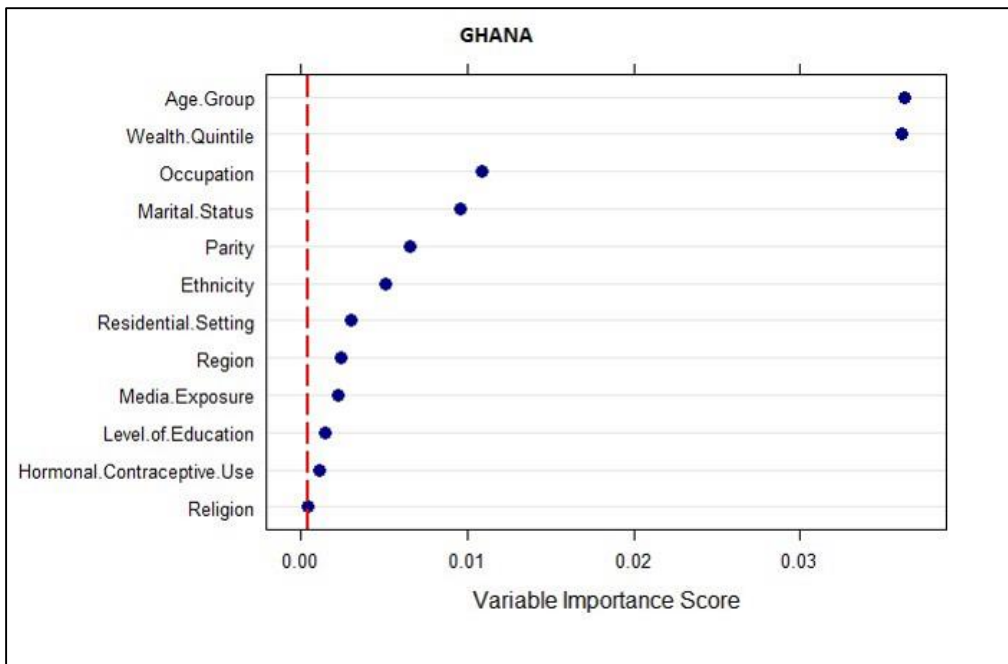

**Figure S35:** Predictors for nutritional status in Ghana (OOB error = 24.4%).

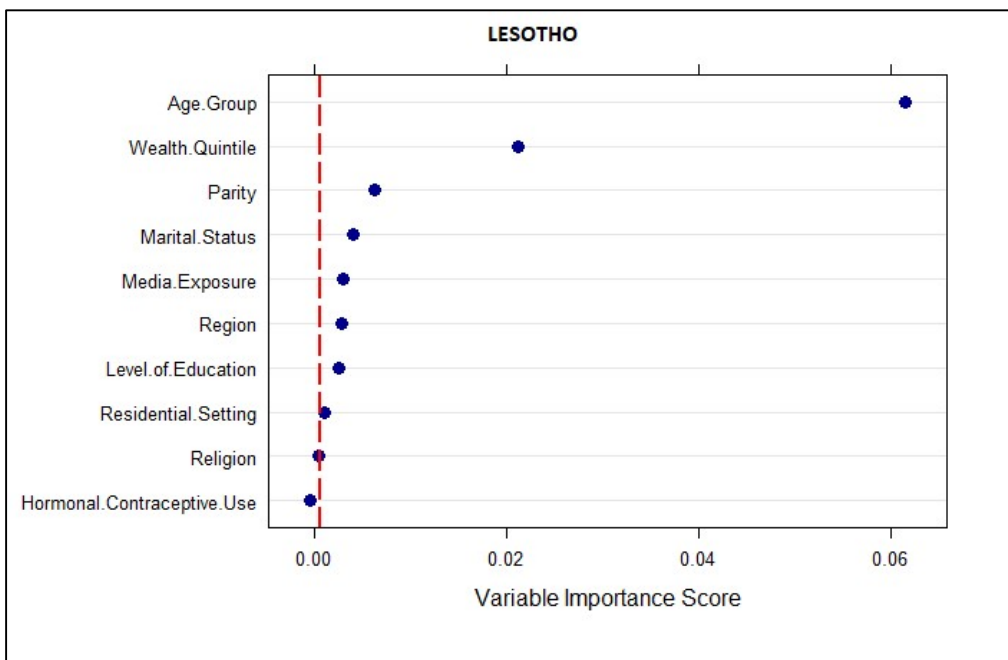

**Figure S36:** Predictors for nutritional status in Lesotho (OOB error = 27.0%).



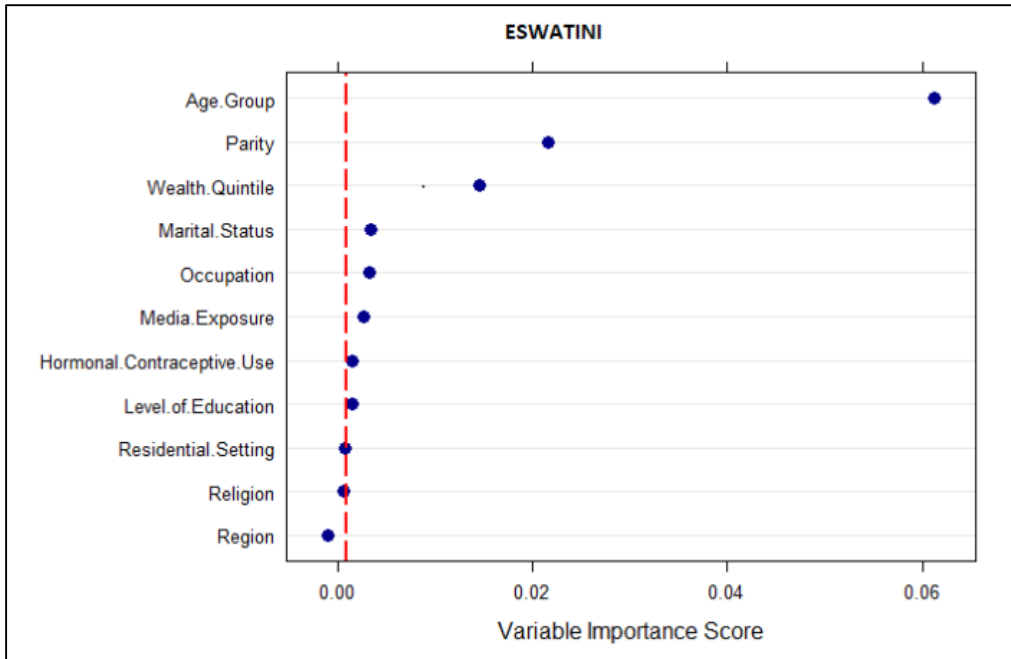

**Figure S37:** Predictors for nutritional status in Eswatini (OOB error = 27.3%).

#### Appendix 4: Logistic regression results for individual-level analysis (Table S35-S68).

1. Multivariable multinomial regression models were implemented to calculate the adjusted and unadjusted associations for each country.
2. Normal weight (BMI 18.5 – 24.9 kg/m<sup>2</sup>) was used as the reference category for the outcome.
3. Beneath each plot, F-value (P-value) has been presented as the goodness of fit statistic.

**Table S35:** Unadjusted and adjusted relative risk ratio, of underweight and overweight/obesity among women of child-bearing age in Madagascar.

| VARIABLES                  | UNDERWEIGHT             |                       | OVERWEIGHT/OBESITY      |                       |
|----------------------------|-------------------------|-----------------------|-------------------------|-----------------------|
|                            | Unadjusted RRR (95% CI) | Adjusted RRR (95% CI) | Unadjusted RRR (95% CI) | Adjusted RRR (95% CI) |
| <b>Age</b>                 |                         |                       |                         |                       |
| 15-19 (Reference)          | 1.00                    | 1.00                  | 1.00                    | 1.00                  |
| 20-24                      | 0.80 (0.66, 0.98)       | 0.84 (0.66, 1.06)     | 3.93 (2.01, 7.67)       | 2.78 (1.31, 5.89)     |
| 25-29                      | 0.95 (0.75, 1.19)       | 0.96 (0.71, 1.28)     | 6.21 (3.26, 11.8)       | 3.74 (1.67, 8.41)     |
| 30-34                      | 0.96 (0.76, 1.22)       | 1.00 (0.74, 1.34)     | 10.1 (5.29, 19.2)       | 5.76 (2.60, 12.8)     |
| 35-39                      | 1.11 (0.88, 1.40)       | 1.16 (0.85, 1.59)     | 13.1 (7.05, 24.5)       | 7.32 (3.27, 16.4)     |
| 40-44                      | 1.04 (0.83, 1.30)       | 1.04 (0.77, 1.41)     | 11.0 (5.72, 21.1)       | 6.29 (2.76, 14.3)     |
| 45-49                      | 1.24 (0.97, 1.58)       | 1.24 (0.89, 1.73)     | 10.3 (5.27, 20.1)       | 6.29 (2.64, 15.0)     |
| <b>Religion</b>            |                         |                       |                         |                       |
| Catholics (Reference)      | 1.00                    | 1.00                  | 1.00                    | 1.00                  |
| Other Christians           | 0.89 (0.75, 1.06)       | 0.93 (0.77, 1.12)     | 1.00 (0.77, 1.29)       | 1.01 (0.77, 1.31)     |
| Islam                      | 1.24 (0.66, 2.33)       | 1.24 (0.67, 2.27)     | 1.93 (0.66, 5.59)       | 1.08 (0.46, 2.52)     |
| Traditionalist             | 1.06 (0.64, 1.75)       | 1.04 (0.65, 1.69)     | 0.75 (0.30, 1.87)       | 2.04 (0.65, 6.43)     |
| Others                     | 0.87 (0.66, 1.13)       | 0.96 (0.73, 1.26)     | 1.41 (0.91, 2.17)       | 1.19 (0.78, 1.83)     |
| No Religion                | 1.15 (0.96, 1.39)       | 1.02 (0.81, 1.27)     | 0.49 (0.33, 0.72)       | 1.26 (0.77, 2.06)     |
| <b>Parity</b>              |                         |                       |                         |                       |
| 0 (Reference)              | 1.00                    | 1.00                  | 1.00                    | 1.00                  |
| 1                          | 0.94 (0.76, 1.18)       | 1.03 (0.77, 1.36)     | 2.32 (1.49, 3.63)       | 1.23 (0.71, 2.16)     |
| 2                          | 0.95 (0.77, 1.18)       | 1.06 (0.80, 1.40)     | 4.01 (2.43, 6.62)       | 1.68 (0.90, 3.15)     |
| 3                          | 1.04 (0.80, 1.34)       | 1.12 (0.81, 1.55)     | 4.04 (2.59, 6.30)       | 1.40 (0.74, 2.63)     |
| 4                          | 1.19 (0.94, 1.50)       | 1.23 (0.88, 1.73)     | 3.13 (1.86, 5.26)       | 1.22 (0.59, 2.52)     |
| 5                          | 1.02 (0.78, 1.35)       | 0.99 (0.68, 1.43)     | 3.19 (1.89, 5.36)       | 1.42 (0.67, 3.01)     |
| 6+                         | 1.34 (1.09, 1.65)       | 1.14 (0.83, 1.57)     | 2.83 (1.85, 4.33)       | 1.45 (0.73, 2.88)     |
| <b>Marital Status</b>      |                         |                       |                         |                       |
| Single (Reference)         | 1.00                    | 1.00                  | 1.00                    | 1.00                  |
| Married                    | 0.96 (0.81, 1.14)       | 0.86 (0.66, 1.12)     | 5.34 (3.42, 8.36)       | 1.65 (0.92, 2.96)     |
| Formerly Married           | 1.13 (0.89, 1.43)       | 0.92 (0.67, 1.26)     | 4.84 (2.84, 8.27)       | 1.57 (0.83, 2.96)     |
| <b>Residential Setting</b> |                         |                       |                         |                       |
| Rural (Reference)          | 1.00                    | 1.00                  | 1.00                    | 1.00                  |
| Urban                      | 0.80 (0.66, 0.95)       | 1.11 (0.85, 1.45)     | 2.73 (2.10, 3.55)       | 0.84 (0.61, 1.17)     |

| VARIABLES                         | UNDERWEIGHT                |                          | OVERWEIGHT/OBESITY         |                          |
|-----------------------------------|----------------------------|--------------------------|----------------------------|--------------------------|
|                                   | Unadjusted<br>RRR (95% CI) | Adjusted<br>RRR (95% CI) | Unadjusted<br>RRR (95% CI) | Adjusted<br>RRR (95% CI) |
| <b>Region</b>                     |                            |                          |                            |                          |
| Analamanga (Reference)            | 1.00                       | 1.00                     | 1.00                       | 1.00                     |
| Vakinankarata                     | 1.29 (0.88, 1.88)          | 1.01 (0.65, 1.56)        | 0.45 (0.22, 0.94)          | 1.26 (0.67, 2.35)        |
| Itasy                             | 1.53 (1.03, 2.27)          | 1.25 (0.79, 2.00)        | 0.40 (0.20, 0.80)          | 1.21 (0.61, 2.38)        |
| Bongolava                         | 0.18 (0.09, 0.36)          | 0.14 (0.07, 0.30)        | 0.58 (0.29, 1.18)          | 1.85 (0.79, 4.34)        |
| Haute Matsiatra                   | 2.35 (1.56, 3.53)          | 1.89 (1.19, 2.98)        | 1.01 (0.57, 1.81)          | 2.51 (1.45, 4.36)        |
| Anamoronn Mania                   | 2.63 (1.76, 3.95)          | 2.10 (1.32, 3.36)        | 0.64 (0.27, 1.53)          | 1.56 (0.78, 3.14)        |
| Vatovavy Fitovinany               | 2.11 (1.37, 3.24)          | 1.39 (0.85, 2.30)        | 0.59 (0.32, 1.10)          | 2.53 (1.33, 4.78)        |
| Ihorombe                          | 1.23 (0.80, 1.89)          | 0.82 (0.50, 1.34)        | 0.53 (0.25, 1.11)          | 1.99 (0.90, 4.38)        |
| Atsimo Atsinanana                 | 2.10 (1.29, 3.43)          | 1.34 (0.78, 2.28)        | 0.25 (0.08, 0.79)          | 1.59 (0.54, 4.64)        |
| Atsinanana                        | 1.63 (1.15, 2.32)          | 1.27 (0.86, 1.86)        | 0.78 (0.42, 1.47)          | 1.38 (0.74, 2.58)        |
| Ananlanjirofo                     | 2.14 (1.37, 3.36)          | 1.53 (0.93, 2.50)        | 0.41 (0.16, 1.06)          | 1.44 (0.56, 3.67)        |
| Alaotra Mangoro                   | 1.08 (0.72, 1.63)          | 0.91 (0.57, 1.43)        | 0.63 (0.32, 1.22)          | 1.11 (0.58, 2.12)        |
| Boeny                             | 1.71 (1.11, 2.66)          | 1.33 (0.81, 2.19)        | 2.27 (1.32, 3.91)          | 4.22 (2.52, 7.05)        |
| Sofia                             | 1.01 (0.62, 1.65)          | 0.67 (0.39, 1.15)        | 0.26 (0.10, 0.69)          | 0.88 (0.33, 2.39)        |
| Betsiboka                         | 0.91 (0.60, 1.38)          | 0.65 (0.39, 1.06)        | 0.21 (0.08, 0.57)          | 0.61 (0.30, 1.26)        |
| Melaky                            | 0.85 (0.54, 1.33)          | 0.53 (0.31, 0.91)        | 0.33 (0.14, 0.80)          | 1.48 (0.64, 3.40)        |
| Atsimo Andrefana                  | 1.44 (0.86, 2.39)          | 0.99 (0.57, 1.73)        | 1.11 (0.62, 1.98)          | 3.32 (1.74, 6.30)        |
| Androy                            | 1.53 (1.07, 2.20)          | 0.91 (0.58, 1.43)        | 0.41 (0.19, 0.88)          | 2.56 (1.09, 5.99)        |
| Anosy                             | 1.13 (0.68, 1.86)          | 0.74 (0.43, 1.29)        | 0.40 (0.15, 1.07)          | 1.65 (0.70, 3.93)        |
| Menabe                            | 1.15 (0.68, 1.94)          | 0.78 (0.46, 1.35)        | 1.32 (0.80, 2.17)          | 4.90 (2.69, 8.92)        |
| Diana                             | 1.37 (0.87, 2.17)          | 1.06 (0.65, 1.74)        | 0.98 (0.53, 1.81)          | 2.15 (1.08, 4.27)        |
| Sava                              | 1.03 (0.64, 1.65)          | 0.81 (0.48, 1.38)        | 0.59 (0.27, 1.29)          | 1.88 (0.79, 4.47)        |
| <b>Level of Education</b>         |                            |                          |                            |                          |
| No Education (Reference)          | 1.00                       | 1.00                     | 1.00                       | 1.00                     |
| Primary                           | 0.79 (0.66, 0.93)          | 0.88 (0.72, 1.07)        | 1.40 (0.93, 2.10)          | 1.02 (0.62, 1.68)        |
| Secondary                         | 0.67 (0.56, 0.80)          | 0.85 (0.66, 1.09)        | 3.17 (2.11, 4.76)          | 1.02 (0.59, 1.75)        |
| Higher                            | 0.39 (0.21, 0.72)          | 0.59 (0.30, 1.15)        | 4.69 (2.35, 9.36)          | 0.85 (0.35, 2.04)        |
| <b>Wealth Quintile</b>            |                            |                          |                            |                          |
| Poorest (Reference)               | 1.00                       | 1.00                     | 1.00                       | 1.00                     |
| Poorer                            | 1.03 (0.83, 1.27)          | 0.97 (0.78, 1.21)        | 1.23 (0.65, 2.32)          | 1.44 (0.72, 2.88)        |
| Middle                            | 0.77 (0.61, 0.97)          | 0.76 (0.58, 0.98)        | 1.40 (0.73, 2.68)          | 1.65 (0.81, 3.36)        |
| Richer                            | 0.66 (0.51, 0.85)          | 0.67 (0.49, 0.91)        | 2.73 (1.58, 4.74)          | 3.20 (1.61, 6.37)        |
| Richest                           | 0.57 (0.45, 0.72)          | 0.55 (0.38, 0.80)        | 7.87 (4.78, 12.9)          | 7.11 (3.47, 14.6)        |
| <b>Occupation</b>                 |                            |                          |                            |                          |
| Not Working (Reference)           | 1.00                       | 1.00                     | 1.00                       | 1.00                     |
| Nonmanual                         | 0.71 (0.55, 0.91)          | 0.74 (0.56, 0.98)        | 4.18 (2.86, 6.11)          | 1.70 (1.13, 2.55)        |
| Manual                            | 0.85 (0.64, 1.13)          | 0.83 (0.61, 1.13)        | 1.84 (1.22, 2.79)          | 1.06 (0.66, 1.68)        |
| Agricultural                      | 1.11 (0.94, 1.32)          | 0.87 (0.66, 1.13)        | 0.73 (0.51, 1.02)          | 0.90 (0.56, 1.44)        |
| Others                            | 0.62 (0.08, 4.85)          | 0.65 (0.07, 5.69)        | 0.52 (0.07, 4.20)          | 0.27 (0.03, 2.20)        |
| <b>Media Exposure</b>             |                            |                          |                            |                          |
| Not Exposed (Reference)           | 1.00                       | 1.00                     | 1.00                       | 1.00                     |
| Exposed to one media source       | 0.85 (0.73, 1.00)          | 1.06 (0.89, 1.27)        | 1.69 (1.18, 2.43)          | 1.27 (0.81, 1.98)        |
| Exposed to two media sources      | 0.68 (0.56, 0.83)          | 1.06 (0.81, 1.38)        | 3.87 (2.69, 5.56)          | 1.73 (1.07, 2.79)        |
| Exposed to three media sources    | 0.63 (0.50, 0.80)          | 1.10 (0.78, 1.55)        | 6.08 (4.20, 8.81)          | 2.24 (1.30, 3.87)        |
| <b>Hormonal Contraceptive Use</b> |                            |                          |                            |                          |
| No (Reference)                    | 1.00                       | 1.00                     | 1.00                       | 1.00                     |
| Yes                               | 0.87 (0.74, 1.04)          | 0.92 (0.76, 1.11)        | 1.41 (1.08, 1.83)          | 1.12 (0.86, 1.47)        |

Overall Model Fit:  $F(112, 440) = 6.49, P=0.0000$ .

**Table S36:** Unadjusted and adjusted relative risk ratio, of underweight and overweight/obesity among women of child-bearing age in Ethiopia.

| VARIABLES                    | UNDERWEIGHT             |                       | OVERWEIGHT/OBESITY      |                       |
|------------------------------|-------------------------|-----------------------|-------------------------|-----------------------|
|                              | Unadjusted RRR (95% CI) | Adjusted RRR (95% CI) | Unadjusted RRR (95% CI) | Adjusted RRR (95% CI) |
| <b>Age</b>                   |                         |                       |                         |                       |
| 15-19 (Reference)            | 1.00                    | 1.00                  | 1.00                    | 1.00                  |
| 20-24                        | 0.66 (0.55, 0.79)       | 0.68 (0.55, 0.84)     | 1.37 (0.90, 2.09)       | 1.19 (0.76, 1.88)     |
| 25-29                        | 0.55 (0.45, 0.66)       | 0.56 (0.43, 0.73)     | 2.15 (1.58, 2.94)       | 1.99 (1.30, 3.05)     |
| 30-34                        | 0.64 (0.53, 0.79)       | 0.62 (0.45, 0.85)     | 3.26 (2.27, 4.67)       | 3.79 (2.31, 6.24)     |
| 35-39                        | 0.75 (0.62, 0.90)       | 0.70 (0.51, 0.97)     | 2.90 (1.95, 4.31)       | 3.66 (2.18, 6.14)     |
| 40-44                        | 0.78 (0.62, 0.97)       | 0.73 (0.51, 1.05)     | 3.35 (2.20, 5.09)       | 5.15 (2.87, 9.25)     |
| 45-49                        | 0.88 (0.68, 1.14)       | 0.81 (0.56, 1.18)     | 2.90 (1.86, 4.53)       | 4.40 (2.43, 7.96)     |
| <b>Ethnicity</b>             |                         |                       |                         |                       |
| Oromo (Reference)            | 1.00                    | 1.00                  | 1.00                    | 1.00                  |
| Affar                        | 2.12 (1.56, 2.89)       | 1.05 (0.58, 1.90)     | 0.65 (0.36, 1.20)       | 0.90 (0.42, 1.90)     |
| Amhara                       | 0.81 (0.69, 0.95)       | 0.89 (0.64, 1.24)     | 1.00 (0.74, 1.35)       | 1.07 (0.82, 1.38)     |
| Guragie                      | 1.12 (0.72, 1.75)       | 1.73 (1.01, 2.98)     | 2.33 (1.37, 3.98)       | 0.97 (0.63, 1.50)     |
| Hadiye                       | 0.81 (0.54, 1.23)       | 1.23 (0.65, 2.30)     | 0.67 (0.35, 1.28)       | 0.90 (0.45, 1.80)     |
| Sidama                       | 0.73 (0.47, 1.13)       | 1.17 (0.65, 2.10)     | 0.38 (0.21, 0.72)       | 0.80 (0.35, 1.86)     |
| Somali                       | 1.62 (1.32, 2.00)       | 1.36 (0.57, 3.25)     | 2.64 (1.78, 3.90)       | 2.39 (1.30, 4.38)     |
| Tigray                       | 1.55 (1.28, 1.88)       | 1.77 (1.05, 2.98)     | 1.21 (0.82, 1.80)       | 1.13 (0.79, 1.61)     |
| Welaita                      | 0.44 (0.37, 0.53)       | 0.70 (0.47, 1.05)     | 0.64 (0.22, 1.86)       | 0.68 (0.31, 1.50)     |
| Others                       | 0.42 (0.33, 0.54)       | 0.61 (0.41, 0.90)     | 0.79 (0.55, 1.14)       | 1.10 (0.70, 1.73)     |
| <b>Religion</b>              |                         |                       |                         |                       |
| Other Christians (Reference) | 1.00                    | 1.00                  | 1.00                    | 1.00                  |
| Catholics                    | 0.53 (0.25, 1.11)       | 0.60 (0.30, 1.22)     | 0.85 (0.26, 2.73)       | 0.84 (0.14, 5.10)     |
| Islam                        | 1.34 (1.17, 1.55)       | 1.06 (0.91, 1.25)     | 0.88 (0.65, 1.19)       | 1.08 (0.80, 1.48)     |
| Others                       | 1.09 (0.48, 2.45)       | 1.15 (0.67, 1.97)     | 0.70 (0.30, 1.64)       | 1.34 (0.46, 3.94)     |
| <b>Parity</b>                |                         |                       |                         |                       |
| 0 (Reference)                | 1.00                    | 1.00                  | 1.00                    | 1.00                  |
| 1                            | 0.86 (0.70, 1.06)       | 1.26 (0.94, 1.67)     | 1.45 (1.06, 2.00)       | 0.88 (0.54, 1.43)     |
| 2                            | 0.75 (0.58, 0.96)       | 1.21 (0.85, 1.72)     | 1.81 (1.28, 2.55)       | 0.93 (0.55, 1.56)     |
| 3                            | 0.91 (0.74, 1.11)       | 1.53 (1.09, 2.14)     | 2.15 (1.57, 2.96)       | 1.39 (0.84, 2.32)     |
| 4                            | 0.72 (0.56, 0.91)       | 1.18 (0.82, 1.71)     | 1.18 (0.82, 1.70)       | 0.73 (0.42, 1.26)     |
| 5                            | 0.99 (0.80, 1.23)       | 1.54 (1.05, 2.24)     | 0.87 (0.55, 1.38)       | 0.68 (0.35, 1.31)     |
| 6+                           | 0.96 (0.81, 1.13)       | 1.33 (0.93, 1.90)     | 0.91 (0.68, 1.24)       | 0.67 (0.38, 1.17)     |
| <b>Marital Status</b>        |                         |                       |                         |                       |
| Single (Reference)           | 1.00                    | 1.00                  | 1.00                    | 1.00                  |
| Married                      | 0.82 (0.72, 0.92)       | 0.77 (0.58, 1.01)     | 1.37 (1.10, 1.71)       | 1.68 (1.09, 2.59)     |
| Formerly Married             | 0.91 (0.74, 1.12)       | 0.84 (0.61, 1.14)     | 2.14 (1.60, 2.86)       | 1.71 (1.06, 2.74)     |
| <b>Residential Setting</b>   |                         |                       |                         |                       |
| Rural (Reference)            | 1.00                    | 1.00                  | 1.00                    | 1.00                  |
| Urban                        | 0.67 (0.57, 0.80)       | 0.68 (0.50, 0.93)     | 6.89 (5.15, 9.23)       | 1.78 (1.23, 2.58)     |

| VARIABLES                         | UNDERWEIGHT                |                          | OVERWEIGHT/OBESITY         |                          |
|-----------------------------------|----------------------------|--------------------------|----------------------------|--------------------------|
|                                   | Unadjusted<br>RRR (95% CI) | Adjusted<br>RRR (95% CI) | Unadjusted<br>RRR (95% CI) | Adjusted<br>RRR (95% CI) |
| <b>Region</b>                     |                            |                          |                            |                          |
| Addis Ababa (Reference)           | 1.00                       | 1.00                     | 1.00                       | 1.00                     |
| Tigray                            | 2.44 (1.91, 3.11)          | 1.13 (0.69, 1.85)        | 0.18 (0.13, 0.26)          | 0.52 (0.30, 0.90)        |
| Afar                              | 3.23 (2.54, 4.12)          | 2.13 (1.34, 3.39)        | 0.32 (0.22, 0.46)          | 1.08 (0.62, 1.91)        |
| Amhara                            | 1.33 (1.07, 1.65)          | 1.20 (0.84, 1.71)        | 0.09 (0.07, 0.12)          | 0.35 (0.22, 0.53)        |
| Oromia                            | 1.55 (1.26, 1.90)          | 1.12 (0.78, 1.61)        | 0.21 (0.14, 0.32)          | 0.80 (0.53, 1.23)        |
| Somali                            | 2.47 (1.92, 3.18)          | 1.14 (0.45, 2.84)        | 0.54 (0.41, 0.72)          | 1.64 (0.89, 3.02)        |
| Benishangul                       | 1.21 (0.95, 1.54)          | 1.22 (0.86, 1.74)        | 0.19 (0.14, 0.25)          | 0.95 (0.60, 1.50)        |
| Snnpr                             | 0.81 (0.64, 1.03)          | 0.70 (0.48, 1.01)        | 0.14 (0.10, 0.19)          | 0.71 (0.41, 1.22)        |
| Gambela                           | 2.25 (1.66, 3.06)          | 2.61 (1.73, 3.94)        | 0.27 (0.20, 0.38)          | 0.60 (0.39, 0.92)        |
| Harari                            | 1.54 (1.17, 2.04)          | 1.28 (0.90, 1.84)        | 0.67 (0.53, 0.84)          | 1.04 (0.77, 1.42)        |
| Dire Dawa                         | 1.69 (1.33, 2.14)          | 1.42 (1.02, 1.97)        | 0.74 (0.60, 0.91)          | 1.04 (0.78, 1.38)        |
| <b>Level of Education</b>         |                            |                          |                            |                          |
| No Education (Reference)          | 1.00                       | 1.00                     | 1.00                       | 1.00                     |
| Primary                           | 1.06 (0.93, 1.20)          | 1.05 (0.90, 1.24)        | 1.64 (1.35, 2.00)          | 1.49 (1.11, 1.99)        |
| Secondary                         | 0.73 (0.58, 0.91)          | 0.80 (0.61, 1.04)        | 2.92 (2.23, 3.84)          | 1.57 (1.04, 2.39)        |
| Higher                            | 1.03 (0.79, 1.35)          | 1.65 (1.19, 2.30)        | 5.88 (3.88, 8.92)          | 1.75 (1.00, 3.04)        |
| <b>Wealth Quintile</b>            |                            |                          |                            |                          |
| Poorest (Reference)               | 1.00                       | 1.00                     | 1.00                       | 1.00                     |
| Poorer                            | 0.77 (0.63, 0.95)          | 0.85 (0.68, 1.07)        | 1.01 (0.64, 1.61)          | 1.43 (0.87, 2.34)        |
| Middle                            | 0.84 (0.68, 1.04)          | 0.96 (0.76, 1.21)        | 0.93 (0.58, 1.49)          | 1.27 (0.75, 2.16)        |
| Richer                            | 0.79 (0.64, 0.96)          | 0.92 (0.73, 1.16)        | 1.60 (1.05, 2.43)          | 2.12 (1.35, 3.32)        |
| Richest                           | 0.61 (0.49, 0.75)          | 0.82 (0.58, 1.17)        | 8.24 (5.66, 12.00)         | 4.36 (2.73, 6.97)        |
| <b>Occupation</b>                 |                            |                          |                            |                          |
| Not Working (Reference)           | 1.00                       | 1.00                     | 1.00                       | 1.00                     |
| Nonmanual                         | 0.68 (0.58, 0.80)          | 0.79 (0.66, 0.94)        | 2.77 (2.15, 3.55)          | 1.23 (0.96, 1.59)        |
| Manual                            | 0.70 (0.53, 0.91)          | 0.75 (0.56, 0.98)        | 1.35 (0.90, 2.01)          | 0.77 (0.52, 1.14)        |
| Agricultural                      | 0.84 (0.73, 0.97)          | 0.77 (0.66, 0.91)        | 0.42 (0.28, 0.61)          | 0.64 (0.42, 0.98)        |
| Others                            | 1.10 (0.77, 1.57)          | 1.11 (0.76, 1.62)        | 1.02 (0.61, 1.72)          | 0.61 (0.33, 1.13)        |
| <b>Media Exposure</b>             |                            |                          |                            |                          |
| Not Exposed (Reference)           | 1.00                       | 1.00                     | 1.00                       | 1.00                     |
| Exposed to one media source       | 0.97 (0.83, 1.14)          | 1.04 (0.87, 1.24)        | 1.88 (1.41, 2.49)          | 0.96 (0.66, 1.40)        |
| Exposed to two media sources      | 0.87 (0.73, 1.04)          | 0.99 (0.80, 1.22)        | 4.02 (2.97, 5.44)          | 1.34 (0.94, 1.91)        |
| Exposed to three media sources    | 0.79 (0.63, 1.00)          | 0.92 (0.68, 1.25)        | 6.21 (4.64, 8.31)          | 1.48 (0.91, 2.39)        |
| <b>Hormonal Contraceptive Use</b> |                            |                          |                            |                          |
| No (Reference)                    | 1.00                       | 1.00                     | 1.00                       | 1.00                     |
| Yes                               | 0.73 (0.63, 0.85)          | 0.89 (0.75, 1.05)        | 0.98 (0.81, 1.20)          | 0.90 (0.70, 1.17)        |

Overall Model Fit:  $F(104, 514) = 16.72, P=0.0000$ .

**Table S37:** Unadjusted and adjusted relative risk ratio, of underweight and overweight/obesity among women of child-bearing age in Burundi.

| VARIABLES                  | UNDERWEIGHT                |                          | OVERWEIGHT/OBESITY         |                          |
|----------------------------|----------------------------|--------------------------|----------------------------|--------------------------|
|                            | Unadjusted<br>RRR (95% CI) | Adjusted<br>RRR (95% CI) | Unadjusted<br>RRR (95% CI) | Adjusted<br>RRR (95% CI) |
| <b>Age</b>                 |                            |                          |                            |                          |
| 15-19 (Reference)          | 1.00                       | 1.00                     | 1.00                       | 1.00                     |
| 20-24                      | 0.36 (0.26, 0.48)          | 0.48 (0.34, 0.68)        | 1.03 (0.68, 1.57)          | 1.02 (0.60, 1.76)        |
| 25-29                      | 0.47 (0.34, 0.64)          | 0.69 (0.44, 1.08)        | 1.26 (0.82, 1.94)          | 1.14 (0.61, 2.13)        |
| 30-34                      | 0.52 (0.37, 0.72)          | 0.77 (0.46, 1.27)        | 1.42 (0.92, 2.19)          | 1.22 (0.60, 2.48)        |
| 35-39                      | 0.82 (0.58, 1.17)          | 1.31 (0.73, 2.36)        | 1.46 (0.91, 2.34)          | 1.64 (0.80, 3.39)        |
| 40-44                      | 0.88 (0.63, 1.24)          | 1.42 (0.81, 2.48)        | 1.48 (0.92, 2.37)          | 1.98 (0.88, 4.44)        |
| 45-49                      | 1.17 (0.84, 1.63)          | 1.87 (1.03, 3.40)        | 1.55 (0.99, 2.45)          | 2.21 (0.96, 5.06)        |
| <b>Religion</b>            |                            |                          |                            |                          |
| Catholics (Reference)      | 1.00                       | 1.00                     | 1.00                       | 1.00                     |
| Other Christians           | 0.75 (0.60, 0.94)          | 0.84 (0.67, 1.06)        | 1.47 (1.14, 1.89)          | 1.30 (1.00, 1.69)        |
| Islam                      | 0.65 (0.32, 1.32)          | 0.86 (0.40, 1.86)        | 4.44 (2.59, 7.62)          | 1.84 (1.07, 3.15)        |
| Others                     | 1.14 (0.67, 1.94)          | 1.20 (0.69, 2.06)        | 1.10 (0.44, 2.73)          | 1.42 (0.51, 3.99)        |
| <b>Parity</b>              |                            |                          |                            |                          |
| 0 (Reference)              | 1.00                       | 1.00                     | 1.00                       | 1.00                     |
| 1                          | 0.68 (0.49, 0.95)          | 2.12 (1.32, 3.40)        | 0.94 (0.60, 1.48)          | 0.73 (0.32, 1.67)        |
| 2                          | 0.53 (0.36, 0.78)          | 1.75 (0.95, 3.23)        | 1.00 (0.64, 1.54)          | 0.72 (0.30, 1.73)        |
| 3                          | 0.69 (0.46, 1.02)          | 2.21 (1.18, 4.12)        | 1.28 (0.85, 1.94)          | 0.95 (0.39, 2.31)        |
| 4                          | 0.86 (0.56, 1.33)          | 2.17 (1.10, 4.29)        | 1.34 (0.85, 2.12)          | 0.89 (0.37, 2.14)        |
| 5                          | 0.97 (0.65, 1.46)          | 2.12 (1.04, 4.32)        | 1.47 (0.94, 2.31)          | 0.97 (0.39, 2.41)        |
| 6+                         | 0.96 (0.74, 1.25)          | 1.64 (0.84, 3.20)        | 1.14 (0.78, 1.66)          | 0.74 (0.28, 1.93)        |
| <b>Marital Status</b>      |                            |                          |                            |                          |
| Single (Reference)         | 1.00                       | 1.00                     | 1.00                       | 1.00                     |
| Married                    | 0.62 (0.50, 0.77)          | 0.36 (0.22, 0.59)        | 1.24 (0.95, 1.62)          | 1.55 (0.72, 3.34)        |
| Formerly Married           | 1.16 (0.85, 1.56)          | 0.51 (0.30, 0.87)        | 0.93 (0.60, 1.46)          | 1.03 (0.44, 2.39)        |
| <b>Residential Setting</b> |                            |                          |                            |                          |
| Rural (Reference)          | 1.00                       | 1.00                     | 1.00                       | 1.00                     |
| Urban                      | 0.72 (0.52, 0.99)          | 0.87 (0.43, 1.77)        | 6.62 (5.04, 8.70)          | 2.20 (1.36, 3.56)        |
| <b>Region</b>              |                            |                          |                            |                          |
| Bujumbura (Reference)      | 1.00                       | 1.00                     | 1.00                       | 1.00                     |
| North                      | 1.46 (0.98, 2.17)          | 1.11 (0.51, 2.41)        | 0.12 (0.09, 0.18)          | 0.69 (0.42, 1.15)        |
| Centre East                | 1.51 (1.01, 2.26)          | 1.10 (0.51, 2.38)        | 0.13 (0.09, 0.20)          | 0.78 (0.45, 1.36)        |
| West                       | 1.32 (0.87, 2.00)          | 1.12 (0.50, 2.49)        | 0.16 (0.11, 0.25)          | 0.95 (0.54, 1.69)        |
| South                      | 1.24 (0.85, 1.83)          | 1.08 (0.51, 2.29)        | 0.18 (0.13, 0.25)          | 0.94 (0.56, 1.58)        |
| <b>Level of Education</b>  |                            |                          |                            |                          |
| No Education (Reference)   | 1.00                       | 1.00                     | 1.00                       | 1.00                     |
| Primary                    | 1.04 (0.83, 1.30)          | 0.95 (0.76, 1.20)        | 1.33 (0.99, 1.77)          | 1.09 (0.76, 1.55)        |
| Secondary                  | 0.81 (0.59, 1.10)          | 0.62 (0.40, 0.95)        | 3.13 (2.22, 4.43)          | 1.19 (0.71, 1.99)        |
| Higher                     | 0.62 (0.18, 2.07)          | 0.64 (0.18, 2.31)        | 9.18 (5.40, 15.6)          | 1.17 (0.59, 2.33)        |
| <b>Wealth Quintile</b>     |                            |                          |                            |                          |
| Poorest (Reference)        | 1.00                       | 1.00                     | 1.00                       | 1.00                     |
| Poorer                     | 0.61 (0.46, 0.81)          | 0.58 (0.42, 0.78)        | 0.77 (0.41, 1.43)          | 0.69 (0.36, 1.30)        |
| Middle                     | 0.70 (0.51, 0.98)          | 0.67 (0.47, 0.95)        | 1.68 (0.95, 2.99)          | 1.39 (0.77, 2.52)        |
| Richer                     | 0.66 (0.49, 0.89)          | 0.62 (0.45, 0.86)        | 1.48 (0.84, 2.61)          | 1.17 (0.63, 2.18)        |
| Richest                    | 0.54 (0.40, 0.74)          | 0.57 (0.38, 0.84)        | 5.79 (3.64, 9.20)          | 1.80 (0.99, 3.27)        |
| <b>Occupation</b>          |                            |                          |                            |                          |
| Not Working (Reference)    | 1.00                       | 1.00                     | 1.00                       | 1.00                     |
| Nonmanual                  | 0.31 (0.18, 0.52)          | 0.38 (0.22, 0.68)        | 3.79 (2.61, 5.51)          | 1.61 (1.06, 2.43)        |
| Agricultural               | 0.55 (0.44, 0.70)          | 0.53 (0.41, 0.69)        | 0.50 (0.36, 0.68)          | 0.69 (0.42, 1.14)        |
| Others                     | 0.36 (0.10, 1.27)          | 0.30 (0.08, 1.08)        | 1.29 (0.54, 3.05)          | 0.77 (0.31, 1.94)        |

| VARIABLES                         | UNDERWEIGHT                |                          | OVERWEIGHT/OBESITY         |                          |
|-----------------------------------|----------------------------|--------------------------|----------------------------|--------------------------|
|                                   | Unadjusted<br>RRR (95% CI) | Adjusted<br>RRR (95% CI) | Unadjusted<br>RRR (95% CI) | Adjusted<br>RRR (95% CI) |
| <b>Media Exposure</b>             |                            |                          |                            |                          |
| Not Exposed (Reference)           | 1.00                       | 1.00                     | 1.00                       | 1.00                     |
| Exposed to one media source       | 0.99 (0.76, 1.28)          | 1.14 (0.86, 1.51)        | 1.35 (0.85, 2.12)          | 1.15 (0.70, 1.91)        |
| Exposed to two media sources      | 1.03 (0.76, 1.40)          | 1.14 (0.81, 1.59)        | 2.83 (1.73, 4.63)          | 1.58 (0.88, 2.82)        |
| Exposed to three media sources    | 1.13 (0.73, 1.75)          | 1.88 (1.11, 3.18)        | 6.68 (3.95, 11.3)          | 1.54 (0.79, 2.99)        |
| <b>Hormonal Contraceptive Use</b> |                            |                          |                            |                          |
| No (Reference)                    | 1.00                       | 1.00                     | 1.00                       | 1.00                     |
| Yes                               | 0.60 (0.41, 0.88)          | 0.90 (0.59, 1.38)        | 1.91 (1.37, 2.65)          | 1.65 (1.11, 2.46)        |

Overall Model Fit:  $F(72, 272) = 6.88, P=0.0000$ .

**Table S38:** Unadjusted and adjusted relative risk ratio, of underweight and overweight/obesity among women of child-bearing age in Burkina Faso.

| VARIABLES                  | UNDERWEIGHT                |                          | OVERWEIGHT/OBESITY         |                          |
|----------------------------|----------------------------|--------------------------|----------------------------|--------------------------|
|                            | Unadjusted<br>RRR (95% CI) | Adjusted<br>RRR (95% CI) | Unadjusted<br>RRR (95% CI) | Adjusted<br>RRR (95% CI) |
| <b>Age</b>                 |                            |                          |                            |                          |
| 15-19 (Reference)          | 1.00                       | 1.00                     | 1.00                       | 1.00                     |
| 20-24                      | 0.48 (0.38, 0.60)          | 0.75 (0.56, 1.02)        | 1.43 (0.95, 2.14)          | 1.14 (0.73, 1.78)        |
| 25-29                      | 0.46 (0.35, 0.59)          | 0.78 (0.51, 1.19)        | 2.21 (1.51, 3.23)          | 2.04 (1.27, 3.28)        |
| 30-34                      | 0.59 (0.47, 0.76)          | 1.07 (0.71, 1.62)        | 3.00 (2.09, 4.32)          | 3.67 (2.27, 5.94)        |
| 35-39                      | 0.65 (0.51, 0.82)          | 1.19 (0.78, 1.81)        | 2.95 (2.06, 4.21)          | 4.49 (2.66, 7.56)        |
| 40-44                      | 0.79 (0.62, 1.00)          | 1.51 (0.98, 2.32)        | 5.43 (3.80, 7.77)          | 11.1 (6.56, 18.8)        |
| 45-49                      | 0.74 (0.57, 0.96)          | 1.38 (0.87, 2.18)        | 4.37 (3.01, 6.33)          | 10.5 (6.07, 18.1)        |
| <b>Ethnicity</b>           |                            |                          |                            |                          |
| Mossi (Reference)          | 1.00                       | 1.00                     | 1.00                       | 1.00                     |
| Bobo                       | 0.72 (0.49, 1.08)          | 0.89 (0.54, 1.48)        | 1.31 (0.80, 2.16)          | 1.33 (0.78, 2.27)        |
| Fulfuldé / Peul            | 3.01 (2.31, 3.91)          | 2.81 (2.10, 3.76)        | 0.71 (0.45, 1.10)          | 0.95 (0.57, 1.59)        |
| Gourmantché                | 2.03 (1.47, 2.80)          | 0.95 (0.61, 1.49)        | 0.40 (0.23, 0.70)          | 0.87 (0.46, 1.65)        |
| Gourouns                   | 0.96 (0.59, 1.56)          | 0.98 (0.58, 1.66)        | 0.99 (0.63, 1.56)          | 0.97 (0.58, 1.62)        |
| Lobi                       | 1.01 (0.68, 1.50)          | 0.67 (0.31, 1.42)        | 0.62 (0.36, 1.07)          | 0.86 (0.40, 1.85)        |
| Sénoufo                    | 0.73 (0.44, 1.22)          | 1.19 (0.66, 2.15)        | 1.08 (0.75, 1.57)          | 1.04 (0.63, 1.71)        |
| Dagara                     | 0.67 (0.46, 0.97)          | 0.52 (0.31, 0.88)        | 0.91 (0.47, 1.75)          | 0.85 (0.37, 1.97)        |
| Bissa                      | 0.73 (0.51, 1.04)          | 0.69 (0.40, 1.18)        | 0.88 (0.52, 1.50)          | 1.16 (0.68, 1.98)        |
| Others                     | 0.89 (0.59, 1.36)          | 1.06 (0.70, 1.59)        | 1.73 (1.26, 2.38)          | 1.50 (1.06, 2.14)        |
| <b>Religion</b>            |                            |                          |                            |                          |
| Catholics (Reference)      | 1.00                       | 1.00                     | 1.00                       | 1.00                     |
| Other Christians           | 1.17 (0.83, 1.65)          | 0.96 (0.69, 1.33)        | 0.78 (0.53, 1.15)          | 0.80 (0.53, 1.20)        |
| Islam                      | 1.18 (0.98, 1.43)          | 1.02 (0.83, 1.25)        | 0.97 (0.77, 1.23)          | 1.41 (1.06, 1.87)        |
| Traditionalists            | 1.34 (0.97, 1.86)          | 1.09 (0.78, 1.52)        | 0.26 (0.15, 0.43)          | 0.60 (0.32, 1.12)        |
| No Religion                | 0.87 (0.41, 1.85)          | 0.62 (0.29, 1.32)        | 0.39 (0.09, 1.75)          | 0.92 (0.25, 3.44)        |
| <b>Parity</b>              |                            |                          |                            |                          |
| 0 (Reference)              | 1.00                       | 1.00                     | 1.00                       | 1.00                     |
| 1                          | 0.50 (0.38, 0.66)          | 0.76 (0.51, 1.13)        | 1.59 (1.15, 2.21)          | 1.10 (0.71, 1.71)        |
| 2                          | 0.50 (0.38, 0.67)          | 0.75 (0.48, 1.18)        | 1.57 (1.14, 2.16)          | 0.86 (0.53, 1.37)        |
| 3                          | 0.45 (0.34, 0.59)          | 0.64 (0.40, 1.02)        | 2.02 (1.51, 2.69)          | 0.93 (0.58, 1.50)        |
| 4                          | 0.79 (0.61, 1.02)          | 1.00 (0.62, 1.63)        | 2.01 (1.44, 2.80)          | 0.88 (0.53, 1.45)        |
| 5                          | 0.67 (0.50, 0.89)          | 0.74 (0.44, 1.23)        | 1.95 (1.37, 2.77)          | 0.82 (0.47, 1.43)        |
| 6+                         | 0.78 (0.64, 0.95)          | 0.66 (0.41, 1.07)        | 1.46 (1.11, 1.92)          | 0.53 (0.30, 0.93)        |
| <b>Marital Status</b>      |                            |                          |                            |                          |
| Single (Reference)         | 1.00                       | 1.00                     | 1.00                       | 1.00                     |
| Married                    | 0.62 (0.52, 0.73)          | 0.50 (0.34, 0.75)        | 1.90 (1.44, 2.50)          | 1.81 (1.10, 2.98)        |
| Formerly Married           | 0.53 (0.34, 0.83)          | 0.50 (0.29, 0.88)        | 2.77 (1.74, 4.41)          | 1.27 (0.61, 2.63)        |
| <b>Residential Setting</b> |                            |                          |                            |                          |
| Rural (Reference)          | 1.00                       | 1.00                     | 1.00                       | 1.00                     |
| Urban                      | 0.47 (0.37, 0.58)          | 0.62 (0.46, 0.84)        | 4.65 (3.84, 5.64)          | 1.51 (1.12, 2.05)        |



| VARIABLES                         | UNDERWEIGHT                |                          | OVERWEIGHT/OBESITY         |                          |
|-----------------------------------|----------------------------|--------------------------|----------------------------|--------------------------|
|                                   | Unadjusted<br>RRR (95% CI) | Adjusted<br>RRR (95% CI) | Unadjusted<br>RRR (95% CI) | Adjusted<br>RRR (95% CI) |
| <b>Region</b>                     |                            |                          |                            |                          |
| Centre (Reference)                | 1.00                       | 1.00                     | 1.00                       | 1.00                     |
| Boucle de Mouhoun                 | 1.49 (0.99, 2.23)          | 0.86 (0.55, 1.35)        | 0.29 (0.20, 0.42)          | 0.64 (0.39, 1.04)        |
| Cascades                          | 0.96 (0.58, 1.61)          | 0.61 (0.33, 1.15)        | 0.41 (0.29, 0.57)          | 0.76 (0.46, 1.24)        |
| Centre-Est                        | 1.93 (1.22, 3.03)          | 1.36 (0.79, 2.33)        | 0.21 (0.15, 0.30)          | 0.46 (0.30, 0.71)        |
| Centre-Nord                       | 1.60 (1.02, 2.49)          | 1.03 (0.64, 1.65)        | 0.15 (0.08, 0.28)          | 0.45 (0.23, 0.87)        |
| Centre-Ouest                      | 2.10 (1.41, 3.13)          | 1.38 (0.89, 2.14)        | 0.25 (0.15, 0.41)          | 0.73 (0.44, 1.21)        |
| Centre-Sud                        | 2.25 (1.43, 3.54)          | 1.53 (0.95, 2.45)        | 0.14 (0.08, 0.26)          | 0.40 (0.21, 0.75)        |
| Est                               | 4.19 (2.85, 6.16)          | 2.61 (1.64, 4.15)        | 0.19 (0.12, 0.31)          | 0.88 (0.52, 1.50)        |
| Hauts Basins                      | 1.44 (0.93, 2.22)          | 1.06 (0.65, 1.71)        | 0.60 (0.45, 0.79)          | 0.85 (0.63, 1.16)        |
| Nord                              | 2.30 (1.51, 3.50)          | 1.44 (0.94, 2.22)        | 0.16 (0.10, 0.25)          | 0.41 (0.26, 0.64)        |
| Plateau Central                   | 1.31 (0.83, 2.08)          | 0.86 (0.54, 1.39)        | 0.18 (0.12, 0.27)          | 0.54 (0.33, 0.88)        |
| Sahel                             | 2.83 (1.77, 4.54)          | 0.93 (0.56, 1.55)        | 0.28 (0.19, 0.43)          | 0.83 (0.49, 1.40)        |
| Sud-Ouest                         | 1.74 (1.20, 2.54)          | 1.70 (0.90, 3.22)        | 0.22 (0.16, 0.32)          | 1.01 (0.55, 1.88)        |
| <b>Level of Education</b>         |                            |                          |                            |                          |
| No Education (Reference)          | 1.00                       | 1.00                     | 1.00                       | 1.00                     |
| Primary                           | 0.70 (0.55, 0.89)          | 0.87 (0.67, 1.13)        | 2.04 (1.65, 2.54)          | 1.34 (1.02, 1.75)        |
| Secondary                         | 0.70 (0.54, 0.92)          | 0.78 (0.55, 1.11)        | 3.04 (2.44, 3.79)          | 1.74 (1.25, 2.42)        |
| Higher                            | 0.77 (0.40, 1.51)          | 1.63 (0.71, 3.75)        | 3.62 (1.98, 6.62)          | 0.89 (0.44, 1.81)        |
| <b>Wealth Quintile</b>            |                            |                          |                            |                          |
| Poorest (Reference)               | 1.00                       | 1.00                     | 1.00                       | 1.00                     |
| Poorer                            | 0.82 (0.66, 1.01)          | 0.88 (0.71, 1.08)        | 1.36 (0.88, 2.10)          | 1.45 (0.94, 2.26)        |
| Middle                            | 0.67 (0.53, 0.85)          | 0.78 (0.61, 1.00)        | 1.50 (0.97, 2.31)          | 1.59 (1.00, 2.52)        |
| Richer                            | 0.52 (0.41, 0.65)          | 0.70 (0.54, 0.92)        | 2.35 (1.50, 3.69)          | 1.91 (1.17, 3.12)        |
| Richest                           | 0.34 (0.26, 0.45)          | 0.47 (0.32, 0.67)        | 8.25 (5.60, 12.2)          | 3.58 (2.09, 6.13)        |
| <b>Occupation</b>                 |                            |                          |                            |                          |
| Not Working (Reference)           | 1.00                       | 1.00                     | 1.00                       | 1.00                     |
| Nonmanual                         | 0.68 (0.53, 0.85)          | 0.74 (0.58, 0.96)        | 1.56 (1.23, 1.98)          | 1.04 (0.82, 1.32)        |
| Manual                            | 0.51 (0.34, 0.76)          | 0.57 (0.37, 0.87)        | 0.78 (0.50, 1.21)          | 0.80 (0.54, 1.19)        |
| Agricultural                      | 0.86 (0.69, 1.06)          | 0.75 (0.59, 0.95)        | 0.31 (0.24, 0.41)          | 0.61 (0.44, 0.84)        |
| Others                            | 0.76 (0.42, 1.36)          | 0.69 (0.34, 1.39)        | 0.59 (0.31, 1.10)          | 0.60 (0.34, 1.07)        |
| <b>Media Exposure</b>             |                            |                          |                            |                          |
| Not Exposed (Reference)           | 1.00                       | 1.00                     | 1.00                       | 1.00                     |
| Exposed to one media source       | 0.81 (0.69, 0.96)          | 0.94 (0.79, 1.12)        | 1.19 (0.92, 1.53)          | 0.97 (0.74, 1.27)        |
| Exposed to two media sources      | 0.68 (0.54, 0.85)          | 1.26 (0.97, 1.65)        | 3.17 (2.44, 4.12)          | 1.11 (0.82, 1.50)        |
| Exposed to three media sources    | 0.54 (0.37, 0.77)          | 1.27 (0.77, 2.10)        | 4.83 (3.56, 6.55)          | 1.11 (0.73, 1.70)        |
| <b>Hormonal Contraceptive Use</b> |                            |                          |                            |                          |
| No (Reference)                    | 1.00                       | 1.00                     | 1.00                       | 1.00                     |
| Yes                               | 0.59 (0.45, 0.76)          | 0.87 (0.67, 1.15)        | 2.33 (1.93, 2.81)          | 1.54 (1.20, 1.97)        |

Overall Model Fit:  $F(110, 438) = 10.81, P=0.0000$ .

**Table S39:** Unadjusted and adjusted relative risk ratio, of underweight and overweight/obesity among women of child-bearing age in Chad.

| VARIABLES                                          | UNDERWEIGHT             |                       | OVERWEIGHT/OBESITY      |                       |
|----------------------------------------------------|-------------------------|-----------------------|-------------------------|-----------------------|
|                                                    | Unadjusted RRR (95% CI) | Adjusted RRR (95% CI) | Unadjusted RRR (95% CI) | Adjusted RRR (95% CI) |
| <b>Age</b>                                         |                         |                       |                         |                       |
| 15-19 (Reference)                                  | 1.00                    | 1.00                  | 1.00                    | 1.00                  |
| 20-24                                              | 0.71 (0.57, 0.88)       | 0.80 (0.62, 1.03)     | 1.40 (0.98, 1.99)       | 1.51 (0.90, 2.54)     |
| 25-29                                              | 0.71 (0.58, 0.85)       | 0.87 (0.64, 1.18)     | 2.27 (1.65, 3.12)       | 3.30 (1.84, 5.92)     |
| 30-34                                              | 0.59 (0.47, 0.73)       | 0.83 (0.59, 1.15)     | 3.13 (2.27, 4.31)       | 5.31 (2.85, 9.90)     |
| 35-39                                              | 0.66 (0.52, 0.84)       | 0.93 (0.63, 1.36)     | 4.33 (3.08, 6.08)       | 7.62 (3.86, 15.0)     |
| 40-44                                              | 0.72 (0.57, 0.92)       | 1.05 (0.73, 1.51)     | 4.88 (3.49, 6.82)       | 9.01 (4.35, 18.6)     |
| 45-49                                              | 0.68 (0.53, 0.88)       | 0.97 (0.64, 1.47)     | 4.33 (3.03, 6.17)       | 8.40 (4.26, 16.6)     |
| <b>Ethnicity</b>                                   |                         |                       |                         |                       |
| Sara (Ngambaye/Sara Madjin-Gaye/Mbaye) (Reference) | 1.00                    | 1.00                  | 1.00                    | 1.00                  |
| Gorane                                             | 5.93 (4.03, 8.72)       | 2.35 (1.18, 4.68)     | 1.76 (0.88, 3.51)       | 1.56 (0.60, 4.11)     |
| Arab                                               | 4.02 (2.77, 5.84)       | 2.44 (1.29, 4.61)     | 1.82 (0.90, 3.69)       | 1.32 (0.53, 3.30)     |
| Baguirmi/Barma                                     | 1.61 (0.79, 3.25)       | 0.91 (0.40, 2.10)     | 4.72 (2.24, 9.93)       | 3.55 (1.39, 9.09)     |
| Kanembou/Bornou/Boudouma                           | 4.43 (3.05, 6.44)       | 1.81 (0.92, 3.56)     | 1.30 (0.62, 2.73)       | 1.70 (0.65, 4.45)     |
| Boulala/Médégo/Kouka                               | 4.19 (2.77, 6.33)       | 2.17 (1.06, 4.41)     | 1.58 (0.74, 3.36)       | 1.10 (0.42, 2.89)     |
| Ouadaï/Maba/Massalit/Mimi                          | 2.65 (1.77, 3.99)       | 1.75 (0.86, 3.55)     | 1.21 (0.59, 2.46)       | 1.09 (0.44, 2.73)     |
| Zaghawa/Bideyat/Kobé                               | 5.64 (3.49, 9.10)       | 4.07 (1.91, 8.67)     | 2.80 (1.04, 7.53)       | 1.81 (0.57, 5.70)     |
| Dadajo/Kibet/Mouro                                 | 2.19 (1.35, 3.54)       | 1.21 (0.58, 2.52)     | 1.00 (0.36, 2.76)       | 1.00 (0.33, 3.06)     |
| Bidio/Migami/Kenga/Dangléat                        | 2.23 (1.26, 3.93)       | 1.38 (0.65, 2.94)     | 1.08 (0.43, 2.69)       | 1.08 (0.28, 4.15)     |
| Moundang                                           | 0.78 (0.40, 1.50)       | 1.25 (0.53, 2.98)     | 1.94 (0.95, 3.96)       | 1.43 (0.54, 3.78)     |
| Massa/Mousseye/Mousgoume                           | 0.75 (0.40, 1.40)       | 0.62 (0.31, 1.26)     | 0.59 (0.25, 1.40)       | 0.61 (0.26, 1.41)     |
| Toupouri/Kéra                                      | 0.79 (0.54, 1.14)       | 1.03 (0.57, 1.86)     | 2.43 (1.31, 4.52)       | 1.90 (0.88, 4.10)     |
| Peul/Foulbé/Bodoré                                 | 6.09 (3.54, 10.5)       | 3.84 (1.89, 7.80)     | 2.16 (0.90, 5.19)       | 1.41 (0.48, 4.16)     |
| Tama/Assongori/Mararit                             | 2.16 (1.25, 3.74)       | 1.64 (0.68, 3.94)     | 1.26 (0.59, 2.69)       | 1.49 (0.52, 4.24)     |
| Gabri/Kabalaye/Nangtchére/Sou mraye                | 0.86 (0.45, 1.63)       | 1.32 (0.57, 3.06)     | 2.70 (1.23, 5.93)       | 2.17 (0.80, 5.89)     |
| Marba/Lélé/Mesmé                                   | 0.72 (0.42, 1.23)       | 1.12 (0.53, 2.33)     | 0.81 (0.35, 1.87)       | 0.68 (0.28, 1.66)     |
| Karo/Zimé/Pévé                                     | 0.49 (0.17, 1.44)       | 0.85 (0.24, 3.03)     | 1.79 (0.87, 3.66)       | 1.78 (0.67, 4.72)     |
| Others                                             | 1.79 (1.09, 2.92)       | 1.39 (0.72, 2.69)     | 3.11 (1.55, 6.26)       | 2.37 (1.04, 5.38)     |
| <b>Religion</b>                                    |                         |                       |                         |                       |
| Catholics (Reference)                              | 1.00                    | 1.00                  | 1.00                    | 1.00                  |
| Other Christians                                   | 1.04 (0.75, 1.44)       | 0.88 (0.62, 1.24)     | 1.21 (0.99, 1.49)       | 1.27 (1.02, 1.58)     |
| Islam                                              | 4.77 (3.85, 5.91)       | 2.02 (1.23, 3.31)     | 0.92 (0.72, 1.18)       | 1.80 (1.12, 2.90)     |
| Traditionalists                                    | 1.88 (0.46, 7.64)       | 1.23 (0.26, 5.82)     | 0.30 (0.04, 2.18)       | 0.70 (0.09, 5.26)     |
| No Religion                                        | 0.85 (0.54, 1.33)       | 0.78 (0.48, 1.27)     | 0.37 (0.20, 0.69)       | 0.69 (0.34, 1.41)     |
| <b>Parity</b>                                      |                         |                       |                         |                       |
| 0 (Reference)                                      | 1.00                    | 1.00                  | 1.00                    | 1.00                  |
| 1                                                  | 0.79 (0.60, 1.04)       | 1.26 (0.87, 1.83)     | 0.91 (0.58, 1.45)       | 0.82 (0.35, 1.91)     |
| 2                                                  | 0.70 (0.55, 0.90)       | 1.06 (0.72, 1.56)     | 1.59 (1.11, 2.29)       | 1.07 (0.51, 2.24)     |
| 3                                                  | 0.74 (0.57, 0.96)       | 1.09 (0.74, 1.62)     | 1.41 (0.94, 2.12)       | 0.74 (0.35, 1.56)     |
| 4                                                  | 0.78 (0.61, 0.99)       | 1.10 (0.72, 1.69)     | 1.84 (1.23, 2.75)       | 0.94 (0.43, 2.04)     |
| 5                                                  | 0.69 (0.54, 0.87)       | 0.85 (0.57, 1.27)     | 1.58 (1.08, 2.30)       | 0.72 (0.35, 1.47)     |
| 6+                                                 | 0.63 (0.53, 0.74)       | 0.81 (0.56, 1.17)     | 2.13 (1.62, 2.80)       | 0.76 (0.39, 1.49)     |
| <b>Marital Status</b>                              |                         |                       |                         |                       |
| Single (Reference)                                 | 1.00                    | 1.00                  | 1.00                    | 1.00                  |
| Married                                            | 0.72 (0.61, 0.85)       | 0.72 (0.51, 1.01)     | 1.58 (1.20, 2.09)       | 0.92 (0.38, 2.22)     |
| Formerly Married                                   | 0.67 (0.51, 0.87)       | 0.74 (0.49, 1.13)     | 2.90 (2.04, 4.11)       | 1.09 (0.42, 2.81)     |

| VARIABLES                         | UNDERWEIGHT                |                          | OVERWEIGHT/OBESITY         |                          |
|-----------------------------------|----------------------------|--------------------------|----------------------------|--------------------------|
|                                   | Unadjusted<br>RRR (95% CI) | Adjusted<br>RRR (95% CI) | Unadjusted<br>RRR (95% CI) | Adjusted<br>RRR (95% CI) |
| <b>Residential Setting</b>        |                            |                          |                            |                          |
| Rural (Reference)                 | 1.00                       | 1.00                     | 1.00                       | 1.00                     |
| Urban                             | 0.95 (0.79, 1.14)          | 1.20 (0.84, 1.73)        | 3.71 (3.10, 4.43)          | 1.81 (1.33, 2.44)        |
| <b>Region</b>                     |                            |                          |                            |                          |
| N'Djaména (Reference)             | 1.00                       | 1.00                     | 1.00                       | 1.00                     |
| Batha                             | 2.31 (1.66, 3.22)          | 1.24 (0.80, 1.93)        | 0.30 (0.17, 0.52)          | 0.64 (0.33, 1.25)        |
| Borkou, Tibesti                   | 1.76 (1.19, 2.62)          | 0.82 (0.53, 1.29)        | 0.82 (0.59, 1.14)          | 1.17 (0.69, 1.96)        |
| Chari Baguirmi                    | 1.77 (1.22, 2.57)          | 1.12 (0.76, 1.63)        | 0.26 (0.18, 0.39)          | 0.53 (0.32, 0.88)        |
| Guéra                             | 1.25 (0.82, 1.89)          | 0.90 (0.59, 1.40)        | 0.21 (0.10, 0.45)          | 0.44 (0.19, 1.01)        |
| Hadjer-Lamis                      | 1.55 (1.08, 2.22)          | 0.77 (0.52, 1.14)        | 0.21 (0.12, 0.38)          | 0.46 (0.26, 0.82)        |
| Kanem                             | 3.38 (2.50, 4.57)          | 1.65 (1.06, 2.56)        | 0.14 (0.08, 0.24)          | 0.25 (0.12, 0.52)        |
| Lac                               | 2.70 (2.09, 3.50)          | 1.54 (1.00, 2.37)        | 0.09 (0.05, 0.16)          | 0.19 (0.09, 0.40)        |
| Logone Occidental                 | 0.45 (0.27, 0.77)          | 0.93 (0.55, 1.58)        | 0.57 (0.42, 0.79)          | 0.95 (0.64, 1.40)        |
| Logone Oriental                   | 0.56 (0.39, 0.82)          | 1.16 (0.75, 1.78)        | 0.33 (0.25, 0.45)          | 0.69 (0.46, 1.02)        |
| Mandoul                           | 0.46 (0.34, 0.62)          | 1.00 (0.66, 1.52)        | 0.28 (0.19, 0.41)          | 0.58 (0.37, 0.92)        |
| Mayo Kebbi Est                    | 0.52 (0.34, 0.80)          | 1.33 (0.77, 2.27)        | 0.15 (0.09, 0.26)          | 0.70 (0.39, 1.28)        |
| Mayo Kebbi Ouest                  | 0.38 (0.24, 0.61)          | 0.65 (0.33, 1.27)        | 0.31 (0.23, 0.44)          | 0.82 (0.47, 1.41)        |
| Moyen Chari                       | 0.40 (0.26, 0.63)          | 0.65 (0.40, 1.06)        | 0.46 (0.30, 0.72)          | 0.75 (0.48, 1.18)        |
| Ouaddaï                           | 1.33 (0.91, 1.94)          | 0.79 (0.50, 1.25)        | 0.20 (0.12, 0.33)          | 0.48 (0.25, 0.91)        |
| Salamat                           | 1.52 (1.02, 2.27)          | 0.89 (0.56, 1.41)        | 0.16 (0.09, 0.29)          | 0.31 (0.17, 0.58)        |
| Tandjilé                          | 0.35 (0.23, 0.53)          | 0.74 (0.40, 1.40)        | 0.28 (0.18, 0.42)          | 0.78 (0.44, 1.38)        |
| Wadi Fira                         | 1.31 (0.95, 1.81)          | 0.60 (0.37, 0.98)        | 0.19 (0.13, 0.29)          | 0.50 (0.26, 0.95)        |
| Barh El Gazal                     | 3.28 (2.19, 4.90)          | 1.56 (0.96, 2.53)        | 0.28 (0.15, 0.52)          | 0.47 (0.23, 0.95)        |
| Ennedi Est, Ennedi Ouest          | 2.18 (1.21, 3.91)          | 0.81 (0.40, 1.64)        | 0.50 (0.27, 0.92)          | 0.93 (0.44, 1.97)        |
| Sila                              | 1.87 (1.24, 2.82)          | 1.19 (0.74, 1.92)        | 0.14 (0.07, 0.28)          | 0.36 (0.18, 0.73)        |
| <b>Level of Education</b>         |                            |                          |                            |                          |
| No Education (Reference)          | 1.00                       | 1.00                     | 1.00                       | 1.00                     |
| Primary                           | 0.44 (0.36, 0.52)          | 0.98 (0.80, 1.20)        | 1.43 (1.14, 1.79)          | 1.37 (1.01, 1.85)        |
| Secondary                         | 0.55 (0.44, 0.68)          | 1.22 (0.90, 1.66)        | 1.69 (1.34, 2.14)          | 1.48 (1.02, 2.14)        |
| Higher                            | 0.26 (0.08, 0.86)          | 0.67 (0.18, 2.53)        | 6.15 (3.63, 10.4)          | 1.79 (0.96, 3.31)        |
| <b>Wealth Quintile</b>            |                            |                          |                            |                          |
| Poorest (Reference)               | 1.00                       | 1.00                     | 1.00                       | 1.00                     |
| Poorer                            | 1.09 (0.88, 1.35)          | 0.98 (0.79, 1.22)        | 1.19 (0.89, 1.59)          | 1.41 (1.02, 1.94)        |
| Middle                            | 1.41 (1.15, 1.73)          | 1.07 (0.87, 1.31)        | 1.02 (0.71, 1.46)          | 1.15 (0.79, 1.68)        |
| Richer                            | 1.61 (1.29, 2.01)          | 1.05 (0.79, 1.38)        | 1.22 (0.87, 1.70)          | 1.37 (0.94, 1.97)        |
| Richest                           | 1.12 (0.91, 1.37)          | 0.72 (0.52, 0.99)        | 4.02 (3.06, 5.26)          | 1.73 (1.20, 2.49)        |
| <b>Occupation</b>                 |                            |                          |                            |                          |
| Not Working (Reference)           | 1.00                       | 1.00                     | 1.00                       | 1.00                     |
| Nonmanual                         | 0.35 (0.29, 0.42)          | 0.73 (0.61, 0.88)        | 1.67 (1.35, 2.06)          | 1.25 (0.99, 1.59)        |
| Manual                            | 0.88 (0.61, 1.27)          | 0.72 (0.50, 1.03)        | 0.57 (0.23, 1.43)          | 0.45 (0.15, 1.36)        |
| Agricultural                      | 0.71 (0.58, 0.86)          | 1.05 (0.85, 1.30)        | 0.78 (0.54, 1.11)          | 1.00 (0.68, 1.47)        |
| Others                            | 0.41 (0.17, 0.99)          | 0.47 (0.24, 0.95)        | 0.21 (0.05, 0.91)          | 0.32 (0.07, 1.49)        |
| <b>Media Exposure</b>             |                            |                          |                            |                          |
| Not Exposed (Reference)           | 1.00                       | 1.00                     | 1.00                       | 1.00                     |
| Exposed to one media source       | 0.72 (0.59, 0.88)          | 0.97 (0.77, 1.22)        | 1.97 (1.50, 2.59)          | 1.17 (0.85, 1.61)        |
| Exposed to two media sources      | 0.66 (0.51, 0.85)          | 0.83 (0.60, 1.13)        | 2.44 (1.86, 3.21)          | 1.02 (0.71, 1.46)        |
| Exposed to three media sources    | 0.72 (0.51, 1.03)          | 0.90 (0.56, 1.46)        | 3.80 (2.85, 5.06)          | 1.25 (0.79, 1.99)        |
| <b>Hormonal Contraceptive Use</b> |                            |                          |                            |                          |
| No (Reference)                    | 1.00                       | 1.00                     | 1.00                       | 1.00                     |
| Yes                               | 0.23 (0.12, 0.46)          | 0.48 (0.23, 1.01)        | 1.93 (1.37, 2.74)          | 0.91 (0.62, 1.33)        |

Overall Model Fit:  $F(144, 430) = 14.19, P=0.0000$ .

**Table S40:** Unadjusted and adjusted relative risk ratio, of underweight and overweight/obesity among women of child-bearing age in Democratic Republic of Congo.

| VARIABLES                                 | UNDERWEIGHT                |                          | OVERWEIGHT/OBESITY         |                          |
|-------------------------------------------|----------------------------|--------------------------|----------------------------|--------------------------|
|                                           | Unadjusted<br>RRR (95% CI) | Adjusted<br>RRR (95% CI) | Unadjusted<br>RRR (95% CI) | Adjusted<br>RRR (95% CI) |
| <b>Age</b>                                |                            |                          |                            |                          |
| 15-19 (Reference)                         | 1.00                       | 1.00                     | 1.00                       | 1.00                     |
| 20-24                                     | 0.73 (0.56, 0.94)          | 0.90 (0.62, 1.30)        | 1.40 (1.01, 1.92)          | 1.25 (0.80, 1.93)        |
| 25-29                                     | 0.58 (0.44, 0.76)          | 0.64 (0.40, 1.00)        | 2.05 (1.51, 2.79)          | 2.01 (1.28, 3.15)        |
| 30-34                                     | 0.58 (0.42, 0.80)          | 0.66 (0.38, 1.15)        | 2.76 (2.07, 3.68)          | 2.76 (1.75, 4.34)        |
| 35-39                                     | 0.67 (0.50, 0.92)          | 0.88 (0.54, 1.45)        | 3.50 (2.59, 4.73)          | 3.53 (2.09, 5.96)        |
| 40-44                                     | 0.66 (0.46, 0.95)          | 0.85 (0.48, 1.48)        | 3.29 (2.35, 4.61)          | 3.51 (2.02, 6.09)        |
| 45-49                                     | 0.42 (0.29, 0.60)          | 0.48 (0.27, 0.84)        | 3.31 (2.40, 4.55)          | 4.56 (2.76, 7.52)        |
| <b>Ethnicity</b>                          |                            |                          |                            |                          |
| Kasai, Katanga, Tanganyika<br>(Reference) | 1.00                       | 1.00                     | 1.00                       | 1.00                     |
| Bakongo Nord & Sud                        | 1.18 (0.75, 1.84)          | 1.13 (0.68, 1.86)        | 1.90 (1.31, 2.76)          | 1.19 (0.68, 2.08)        |
| Bas Kasai et Kwilu-Kwango                 | 1.64 (1.33, 2.02)          | 1.42 (1.01, 2.01)        | 0.76 (0.50, 1.14)          | 0.98 (0.56, 1.73)        |
| Cuvette central                           | 1.21 (0.92, 1.59)          | 0.90 (0.59, 1.37)        | 0.75 (0.42, 1.34)          | 1.06 (0.58, 1.92)        |
| Ubangi et Itimbiri                        | 0.49 (0.36, 0.67)          | 0.34 (0.18, 0.61)        | 0.98 (0.64, 1.50)          | 1.25 (0.68, 2.29)        |
| Uele Lac Albert                           | 0.52 (0.36, 0.75)          | 0.41 (0.16, 1.06)        | 1.68 (1.15, 2.44)          | 1.33 (0.70, 2.53)        |
| Basele-K, Man. et Kivu                    | 0.45 (0.33, 0.62)          | 0.34 (0.08, 1.40)        | 2.26 (1.53, 3.35)          | 2.23 (1.14, 4.35)        |
| Others                                    | 1.59 (0.71, 3.58)          | 1.43 (0.74, 2.75)        | 2.49 (0.97, 6.41)          | 1.97 (0.70, 5.53)        |
| <b>Religion</b>                           |                            |                          |                            |                          |
| Catholics (Reference)                     | 1.00                       | 1.00                     | 1.00                       | 1.00                     |
| Other Christians                          | 1.01 (0.81, 1.26)          | 0.97 (0.78, 1.21)        | 1.18 (0.97, 1.44)          | 1.18 (0.97, 1.43)        |
| Islam                                     | 0.64 (0.32, 1.27)          | 0.92 (0.45, 1.91)        | 1.83 (1.03, 3.24)          | 1.64 (0.84, 3.20)        |
| Traditionalists                           | 3.68 (1.43, 9.46)          | 2.22 (0.84, 5.84)        | 2.06 (0.48, 8.86)          | 2.74 (0.88, 8.50)        |
| Others                                    | 0.97 (0.50, 1.91)          | 0.85 (0.39, 1.84)        | 0.80 (0.47, 1.57)          | 1.13 (0.56, 2.31)        |
| <b>Parity</b>                             |                            |                          |                            |                          |
| 0 (Reference)                             | 1.00                       | 1.00                     | 1.00                       | 1.00                     |
| 1                                         | 0.85 (0.63, 1.16)          | 1.02 (0.68, 1.53)        | 0.92 (0.67, 1.28)          | 0.67 (0.42, 1.07)        |
| 2                                         | 0.58 (0.42, 0.78)          | 0.75 (0.47, 1.19)        | 1.30 (0.97, 1.75)          | 0.78 (0.47, 1.29)        |
| 3                                         | 0.77 (0.56, 1.05)          | 1.07 (0.65, 1.77)        | 1.60 (1.19, 2.14)          | 0.86 (0.51, 1.46)        |
| 4                                         | 0.95 (0.69, 1.31)          | 1.33 (0.75, 2.37)        | 1.34 (0.95, 1.90)          | 0.69 (0.41, 1.15)        |
| 5                                         | 0.76 (0.55, 1.07)          | 0.99 (0.58, 1.68)        | 1.52 (1.16, 2.01)          | 0.80 (0.49, 1.33)        |
| 6+                                        | 0.56 (0.43, 0.73)          | 0.73 (0.44, 1.19)        | 1.75 (1.39, 2.20)          | 0.78 (0.49, 1.25)        |
| <b>Marital Status</b>                     |                            |                          |                            |                          |
| Single (Reference)                        | 1.00                       | 1.00                     | 1.00                       | 1.00                     |
| Married                                   | 0.67 (0.55, 0.82)          | 0.70 (0.49, 1.02)        | 1.66 (1.35, 2.03)          | 2.20 (1.46, 3.32)        |
| Formerly Married                          | 0.75 (0.58, 0.96)          | 0.87 (0.59, 1.30)        | 1.72 (1.31, 2.26)          | 1.63 (1.03, 2.59)        |
| <b>Residential Setting</b>                |                            |                          |                            |                          |
| Rural (Reference)                         | 1.00                       | 1.00                     | 1.00                       | 1.00                     |
| Urban                                     | 0.59 (0.49, 0.71)          | 0.77 (0.56, 1.06)        | 3.03 (2.21, 4.16)          | 1.03 (0.69, 1.54)        |

| VARIABLES                         | UNDERWEIGHT                |                          | OVERWEIGHT/OBESITY         |                          |
|-----------------------------------|----------------------------|--------------------------|----------------------------|--------------------------|
|                                   | Unadjusted<br>RRR (95% CI) | Adjusted<br>RRR (95% CI) | Unadjusted<br>RRR (95% CI) | Adjusted<br>RRR (95% CI) |
| <b>Region</b>                     |                            |                          |                            |                          |
| Kinshasa (Reference)              | 1.00                       | 1.00                     | 1.00                       | 1.00                     |
| Bandundu                          | 3.08 (2.25, 4.21)          | 1.29 (0.81, 2.08)        | 0.11 (0.07, 0.18)          | 0.49 (0.28, 0.84)        |
| Bas-Congo                         | 3.05 (1.66, 5.59)          | 1.55 (0.84, 2.89)        | 0.27 (0.15, 0.48)          | 0.53 (0.32, 0.89)        |
| Equateur                          | 1.40 (0.98, 1.99)          | 1.53 (0.83, 2.81)        | 0.22 (0.14, 0.32)          | 0.78 (0.48, 1.28)        |
| Kasai-Occidental                  | 1.62 (1.16, 2.27)          | 0.86 (0.53, 1.41)        | 0.18 (0.10, 0.33)          | 0.59 (0.31, 1.14)        |
| Kasai-Oriental                    | 1.97 (1.42, 2.72)          | 1.16 (0.73, 1.84)        | 0.25 (0.17, 0.38)          | 0.68 (0.38, 1.21)        |
| Katanga                           | 2.00 (1.42, 2.83)          | 1.12 (0.69, 1.81)        | 0.41 (0.26, 0.65)          | 1.06 (0.59, 1.88)        |
| Maniema                           | 1.04 (0.64, 1.72)          | 1.67 (0.40, 7.07)        | 0.41 (0.30, 0.55)          | 0.73 (0.35, 1.50)        |
| Nord-Kivu                         | 0.71 (0.47, 1.07)          | 1.05 (0.27, 4.06)        | 0.77 (0.54, 1.09)          | 1.29 (0.68, 2.45)        |
| Oriental                          | 0.92 (0.60, 1.41)          | 1.15 (0.41, 3.21)        | 0.57 (0.42, 0.78)          | 1.74 (1.00, 3.03)        |
| Sud-Kivu                          | 0.91 (0.46, 1.78)          | 1.45 (0.35, 6.05)        | 0.76 (0.39, 1.49)          | 1.32 (0.61, 2.83)        |
| <b>Level of Education</b>         |                            |                          |                            |                          |
| No Education (Reference)          | 1.00                       | 1.00                     | 1.00                       | 1.00                     |
| Primary                           | 1.36 (1.10, 1.67)          | 1.15 (0.93, 1.43)        | 1.13 (0.81, 1.58)          | 1.18 (0.85, 1.64)        |
| Secondary                         | 1.09 (0.84, 1.42)          | 0.86 (0.62, 1.19)        | 1.63 (1.23, 2.16)          | 1.19 (0.85, 1.68)        |
| Higher                            | 0.67 (0.40, 1.12)          | 0.89 (0.48, 1.66)        | 3.50 (2.48, 4.93)          | 1.41 (0.82, 2.43)        |
| <b>Wealth Quintile</b>            |                            |                          |                            |                          |
| Poorest (Reference)               | 1.00                       | 1.00                     | 1.00                       | 1.00                     |
| Poorer                            | 1.13 (0.89, 1.45)          | 1.11 (0.87, 1.42)        | 1.02 (0.67, 1.54)          | 0.98 (0.62, 1.54)        |
| Middle                            | 0.87 (0.66, 1.15)          | 0.89 (0.66, 1.19)        | 1.42 (0.98, 2.04)          | 1.18 (0.78, 1.77)        |
| Richer                            | 0.77 (0.54, 1.10)          | 0.88 (0.64, 1.21)        | 2.85 (1.70, 4.78)          | 2.06 (1.33, 3.19)        |
| Richest                           | 0.51 (0.39, 0.66)          | 0.61 (0.40, 0.92)        | 5.97 (4.40, 8.08)          | 4.34 (2.78, 6.77)        |
| <b>Occupation</b>                 |                            |                          |                            |                          |
| Not Working (Reference)           | 1.00                       | 1.00                     | 1.00                       | 1.00                     |
| Nonmanual                         | 0.50 (0.38, 0.64)          | 0.64 (0.49, 0.85)        | 1.60 (1.35, 1.91)          | 1.04 (0.85, 1.26)        |
| Manual                            | 0.14 (0.03, 0.69)          | 0.25 (0.05, 1.36)        | 1.08 (0.42, 2.77)          | 0.66 (0.25, 1.79)        |
| Agricultural                      | 0.95 (0.79, 1.14)          | 0.93 (0.74, 1.18)        | 0.49 (0.38, 0.64)          | 0.56 (0.42, 0.74)        |
| <b>Media Exposure</b>             |                            |                          |                            |                          |
| Not Exposed (Reference)           | 1.00                       | 1.00                     | 1.00                       | 1.00                     |
| Exposed to one media source       | 0.81 (0.63, 1.03)          | 1.00 (0.74, 1.35)        | 1.71 (1.33, 2.20)          | 0.99 (0.78, 1.25)        |
| Exposed to two media sources      | 0.68 (0.50, 0.91)          | 0.92 (0.64, 1.31)        | 2.65 (2.15, 3.27)          | 1.15 (0.85, 1.55)        |
| Exposed to three media sources    | 0.67 (0.42, 1.06)          | 1.06 (0.62, 1.80)        | 3.43 (2.54, 4.63)          | 1.28 (0.92, 1.77)        |
| <b>Hormonal Contraceptive Use</b> |                            |                          |                            |                          |
| No (Reference)                    | 1.00                       | 1.00                     | 1.00                       | 1.00                     |
| Yes                               | 0.28 (0.11, 0.72)          | 0.45 (0.17, 1.22)        | 2.49 (1.68, 3.70)          | 1.33 (0.86, 2.04)        |

Overall Model Fit:  $F(100, 371) = 12.92, P=0.0000$ .

**Table S41:** Unadjusted and adjusted relative risk ratio, of underweight and overweight/obesity among women of child-bearing age in Niger.

| VARIABLES                  | UNDERWEIGHT                |                          | OVERWEIGHT/OBESITY         |                          |
|----------------------------|----------------------------|--------------------------|----------------------------|--------------------------|
|                            | Unadjusted<br>RRR (95% CI) | Adjusted<br>RRR (95% CI) | Unadjusted<br>RRR (95% CI) | Adjusted<br>RRR (95% CI) |
| <b>Age</b>                 |                            |                          |                            |                          |
| 15-19 (Reference)          | 1.00                       | 1.00                     | 1.00                       | 1.00                     |
| 20-24                      | 0.43 (0.32, 0.57)          | 0.67 (0.46, 0.98)        | 1.78 (1.16, 2.72)          | 1.50 (0.89, 2.53)        |
| 25-29                      | 0.34 (0.25, 0.46)          | 0.54 (0.33, 0.89)        | 3.27 (2.20, 4.86)          | 3.67 (2.11, 6.36)        |
| 30-34                      | 0.36 (0.24, 0.52)          | 0.52 (0.31, 0.87)        | 4.96 (3.31, 7.42)          | 6.72 (3.73, 12.1)        |
| 35-39                      | 0.30 (0.21, 0.44)          | 0.42 (0.23, 0.78)        | 4.72 (3.20, 6.97)          | 6.45 (3.67, 11.3)        |
| 40-44                      | 0.44 (0.30, 0.65)          | 0.59 (0.33, 1.05)        | 5.19 (3.39, 7.96)          | 7.68 (4.17, 14.1)        |
| 45-49                      | 0.54 (0.32, 0.89)          | 0.72 (0.36, 1.47)        | 4.91 (3.14, 7.70)          | 7.68 (4.21, 14.0)        |
| <b>Parity</b>              |                            |                          |                            |                          |
| 0 (Reference)              | 1.00                       | 1.00                     | 1.00                       | 1.00                     |
| 1                          | 0.42 (0.28, 0.62)          | 0.61 (0.37, 0.99)        | 1.72 (1.11, 2.65)          | 1.02 (0.56, 1.85)        |
| 2                          | 0.29 (0.19, 0.45)          | 0.54 (0.31, 0.93)        | 2.11 (1.43, 3.14)          | 0.87 (0.46, 1.64)        |
| 3                          | 0.37 (0.25, 0.56)          | 0.67 (0.37, 1.23)        | 1.87 (1.27, 2.76)          | 0.71 (0.40, 1.29)        |
| 4                          | 0.36 (0.24, 0.53)          | 0.71 (0.39, 1.31)        | 2.20 (1.46, 3.30)          | 0.66 (0.35, 1.24)        |
| 5                          | 0.30 (0.19, 0.47)          | 0.64 (0.34, 1.22)        | 1.91 (1.28, 2.84)          | 0.50 (0.27, 0.93)        |
| 6+                         | 0.41 (0.31, 0.55)          | 0.82 (0.45, 1.50)        | 2.09 (1.49, 2.93)          | 0.51 (0.28, 0.92)        |
| <b>Marital Status</b>      |                            |                          |                            |                          |
| Single (Reference)         | 1.00                       | 1.00                     | 1.00                       | 1.00                     |
| Married                    | 0.35 (0.27, 0.46)          | 0.57 (0.37, 0.88)        | 2.60 (1.72, 3.92)          | 3.93 (2.21, 6.99)        |
| Formerly Married           | 0.39 (0.22, 0.69)          | 0.62 (0.31, 1.21)        | 3.15 (1.82, 5.44)          | 2.69 (1.30, 5.57)        |
| <b>Residential Setting</b> |                            |                          |                            |                          |
| Rural (Reference)          | 1.00                       | 1.00                     | 1.00                       | 1.00                     |
| Urban                      | 0.90 (0.70, 1.15)          | 1.04 (0.68, 1.59)        | 3.99 (3.24, 4.93)          | 1.57 (1.06, 2.33)        |
| <b>Region</b>              |                            |                          |                            |                          |
| Niamey (Reference)         | 1.00                       | 1.00                     | 1.00                       | 1.00                     |
| Agadez                     | 1.16 (0.72, 1.87)          | 1.09 (0.65, 1.84)        | 0.53 (0.37, 0.75)          | 0.86 (0.55, 1.34)        |
| Diffa                      | 0.63 (0.35, 1.14)          | 0.73 (0.38, 1.41)        | 0.14 (0.09, 0.22)          | 0.29 (0.15, 0.56)        |
| Dosso                      | 0.97 (0.61, 1.55)          | 0.97 (0.55, 1.70)        | 0.38 (0.27, 0.52)          | 1.18 (0.78, 1.78)        |
| Maradi                     | 1.17 (0.75, 1.85)          | 1.24 (0.72, 2.16)        | 0.13 (0.09, 0.19)          | 0.36 (0.23, 0.56)        |
| Tahoua                     | 0.95 (0.58, 1.53)          | 0.87 (0.50, 1.52)        | 0.30 (0.22, 0.43)          | 0.97 (0.63, 1.47)        |
| Tillaberi                  | 0.99 (0.60, 1.64)          | 0.99 (0.55, 1.77)        | 0.35 (0.26, 0.48)          | 1.04 (0.69, 1.58)        |
| Zinder                     | 1.55 (0.99, 2.43)          | 1.69 (0.99, 2.87)        | 0.10 (0.07, 0.16)          | 0.26 (0.16, 0.43)        |
| <b>Level of Education</b>  |                            |                          |                            |                          |
| No Education (Reference)   | 1.00                       | 1.00                     | 1.00                       | 1.00                     |
| Primary                    | 0.99 (0.71, 1.37)          | 0.84 (0.58, 1.23)        | 1.68 (1.31, 2.15)          | 1.22 (0.92, 1.62)        |
| Secondary                  | 1.53 (1.13, 2.08)          | 0.92 (0.58, 1.44)        | 1.89 (1.40, 2.55)          | 1.38 (0.90, 2.11)        |
| Higher                     | 0.30 (0.07, 1.36)          | 0.33 (0.06, 1.78)        | 4.63 (2.08, 10.3)          | 0.89 (0.34, 2.36)        |
| <b>Wealth Quintile</b>     |                            |                          |                            |                          |
| Poorest (Reference)        | 1.00                       | 1.00                     | 1.00                       | 1.00                     |
| Poorer                     | 0.90 (0.65, 1.25)          | 0.94 (0.67, 1.33)        | 1.09 (0.72, 1.65)          | 1.04 (0.69, 1.57)        |
| Middle                     | 0.86 (0.63, 1.18)          | 0.88 (0.63, 1.22)        | 1.00 (0.65, 1.56)          | 0.95 (0.61, 1.49)        |
| Richer                     | 0.67 (0.47, 0.96)          | 0.69 (0.47, 1.01)        | 1.54 (1.02, 2.31)          | 1.46 (0.97, 2.20)        |
| Richest                    | 0.66 (0.48, 0.91)          | 0.50 (0.31, 0.80)        | 4.68 (3.23, 6.80)          | 3.31 (2.07, 5.30)        |
| <b>Occupation</b>          |                            |                          |                            |                          |
| Not Working (Reference)    | 1.00                       | 1.00                     | 1.00                       | 1.00                     |
| Nonmanual                  | 0.83 (0.62, 1.12)          | 0.93 (0.68, 1.27)        | 1.69 (1.35, 2.10)          | 1.23 (0.95, 1.60)        |
| Manual                     | 0.60 (0.31, 1.16)          | 0.63 (0.31, 1.29)        | 2.32 (1.52, 3.55)          | 1.50 (0.88, 2.53)        |
| Agricultural               | 1.04 (0.51, 2.14)          | 1.10 (0.53, 2.29)        | 1.40 (0.75, 2.61)          | 1.45 (0.74, 2.84)        |

| VARIABLES                          | UNDERWEIGHT                |                          | OVERWEIGHT/OBESITY         |                          |
|------------------------------------|----------------------------|--------------------------|----------------------------|--------------------------|
|                                    | Unadjusted<br>RRR (95% CI) | Adjusted<br>RRR (95% CI) | Unadjusted<br>RRR (95% CI) | Adjusted<br>RRR (95% CI) |
| <b>Media Exposure</b>              |                            |                          |                            |                          |
| Not Exposed (Reference)            | 1.00                       | 1.00                     | 1.00                       | 1.00                     |
| Exposed to one media source        | 0.85 (0.66, 1.09)          | 0.91 (0.69, 1.19)        | 1.07 (0.83, 1.38)          | 0.85 (0.65, 1.11)        |
| Exposed to two media sources       | 0.90 (0.68, 1.19)          | 0.97 (0.70, 1.33)        | 2.50 (1.90, 3.29)          | 1.08 (0.78, 1.51)        |
| Exposed to three media sources     | 1.26 (0.81, 1.97)          | 1.20 (0.66, 2.19)        | 3.31 (2.21, 4.95)          | 1.02 (0.59, 1.77)        |
| <b>Hormonal Contraceptives use</b> |                            |                          |                            |                          |
| No (Reference)                     | 1.00                       | 1.00                     | 1.00                       | 1.00                     |
| Yes                                | 0.44 (0.26, 0.74)          | 0.70 (0.42, 1.17)        | 2.69 (2.04, 3.54)          | 1.44 (1.07, 1.95)        |

Overall Model Fit:  $F(72, 385) = 10.21, P=0.0000$ .

**Table S42:** Unadjusted and adjusted relative risk ratio, of underweight and overweight/obesity among women of child-bearing age in Mali.

| VARIABLES                  | UNDERWEIGHT                |                          | OVERWEIGHT/OBESITY         |                          |
|----------------------------|----------------------------|--------------------------|----------------------------|--------------------------|
|                            | Unadjusted<br>RRR (95% CI) | Adjusted<br>RRR (95% CI) | Unadjusted<br>RRR (95% CI) | Adjusted<br>RRR (95% CI) |
| <b>Age</b>                 |                            |                          |                            |                          |
| 15-19 (Reference)          | 1.00                       | 1.00                     | 1.00                       | 1.00                     |
| 20-24                      | 0.60 (0.44, 0.83)          | 0.77 (0.52, 1.13)        | 1.40 (0.94, 2.07)          | 1.65 (1.08, 2.50)        |
| 25-29                      | 0.59 (0.44, 0.79)          | 0.80 (0.52, 1.24)        | 2.90 (2.07, 4.06)          | 4.30 (2.76, 6.71)        |
| 30-34                      | 0.41 (0.28, 0.61)          | 0.51 (0.30, 0.89)        | 3.38 (2.31, 4.94)          | 4.90 (2.98, 8.07)        |
| 35-39                      | 0.42 (0.28, 0.63)          | 0.54 (0.30, 0.95)        | 5.21 (3.53, 7.71)          | 7.84 (4.69, 13.1)        |
| 40-44                      | 0.68 (0.46, 1.00)          | 0.89 (0.51, 1.56)        | 4.96 (3.50, 7.04)          | 7.61 (4.58, 12.6)        |
| 45-49                      | 0.55 (0.34, 0.89)          | 0.70 (0.38, 1.32)        | 4.52 (3.12, 6.55)          | 7.84 (4.72, 13.0)        |
| <b>Ethnicity</b>           |                            |                          |                            |                          |
| Bambara (Reference)        | 1.00                       | 1.00                     | 1.00                       | 1.00                     |
| Malinke                    | 0.85 (0.56, 1.30)          | 0.96 (0.60, 1.52)        | 1.01 (0.71, 1.42)          | 0.73 (0.51, 1.05)        |
| Peulh                      | 1.37 (0.99, 1.89)          | 1.31 (0.93, 1.84)        | 1.10 (0.81, 1.50)          | 0.99 (0.72, 1.37)        |
| Sarakole/Soninke/Marka     | 1.19 (0.83, 1.72)          | 1.34 (0.87, 2.06)        | 1.25 (0.91, 1.72)          | 1.03 (0.71, 1.49)        |
| Dogon                      | 0.82 (0.54, 1.24)          | 0.53 (0.34, 0.83)        | 0.87 (0.60, 1.26)          | 1.03 (0.63, 1.68)        |
| Sénoufo/Minianka           | 0.86 (0.55, 1.34)          | 0.82 (0.52, 1.29)        | 0.81 (0.53, 1.23)          | 0.84 (0.54, 1.29)        |
| Others                     | 0.71 (0.50, 1.02)          | 0.71 (0.47, 1.06)        | 1.31 (0.98, 1.76)          | 1.15 (0.83, 1.59)        |
| <b>Religion</b>            |                            |                          |                            |                          |
| Islam (Reference)          | 1.00                       | 1.00                     | 1.00                       | 1.00                     |
| Catholics                  | 0.50 (0.20, 1.23)          | 0.61 (0.23, 1.59)        | 0.85 (0.44, 1.67)          | 0.85 (0.43, 1.66)        |
| Other Christians           | 0.47 (0.18, 1.21)          | 0.57 (0.22, 1.50)        | 0.52 (0.29, 0.92)          | 0.70 (0.40, 1.24)        |
| Traditionalists            | 0.22 (0.05, 1.04)          | 0.25 (0.05, 1.22)        | 0.29 (0.08, 1.02)          | 0.55 (0.17, 1.82)        |
| No Religion                | 1.33 (0.72, 2.43)          | 1.40 (0.74, 2.68)        | 0.46 (0.20, 1.02)          | 0.89 (0.37, 2.09)        |
| <b>Parity</b>              |                            |                          |                            |                          |
| 0 (Reference)              | 1.00                       | 1.00                     | 1.00                       | 1.00                     |
| 1                          | 0.88 (0.64, 1.22)          | 1.08 (0.72, 1.60)        | 1.10 (0.77, 1.56)          | 0.82 (0.52, 1.30)        |
| 2                          | 0.40 (0.28, 0.57)          | 0.52 (0.32, 0.84)        | 1.55 (1.12, 2.15)          | 0.82 (0.53, 1.28)        |
| 3                          | 0.37 (0.24, 0.58)          | 0.46 (0.25, 0.82)        | 1.52 (1.06, 2.19)          | 0.66 (0.41, 1.07)        |
| 4                          | 0.64 (0.44, 0.93)          | 0.82 (0.47, 1.43)        | 1.93 (1.40, 2.65)          | 0.80 (0.49, 1.29)        |
| 5                          | 0.63 (0.43, 0.92)          | 0.88 (0.51, 1.50)        | 1.70 (1.20, 2.40)          | 0.66 (0.40, 1.10)        |
| 6+                         | 0.54 (0.41, 0.73)          | 0.75 (0.45, 1.26)        | 2.27 (1.67, 3.08)          | 0.86 (0.54, 1.37)        |
| <b>Marital Status</b>      |                            |                          |                            |                          |
| Single (Reference)         | 1.00                       | 1.00                     | 1.00                       | 1.00                     |
| Married                    | 0.56 (0.45, 0.70)          | 0.75 (0.51, 1.10)        | 2.01 (1.45, 2.78)          | 1.42 (0.85, 2.38)        |
| Formerly Married           | 0.66 (0.34, 1.29)          | 0.88 (0.41, 1.87)        | 2.67 (1.50, 4.78)          | 1.20 (0.59, 2.45)        |
| <b>Residential Setting</b> |                            |                          |                            |                          |
| Rural (Reference)          | 1.00                       | 1.00                     | 1.00                       | 1.00                     |
| Urban                      | 0.99 (0.79, 1.25)          | 0.98 (0.63, 1.52)        | 3.25 (2.67, 3.96)          | 1.55 (1.08, 2.23)        |
| <b>Region</b>              |                            |                          |                            |                          |
| Bamako (Reference)         | 1.00                       | 1.00                     | 1.00                       | 1.00                     |
| Kayes                      | 0.89 (0.59, 1.35)          | 0.74 (0.39, 1.40)        | 0.36 (0.26, 0.49)          | 0.87 (0.60, 1.27)        |
| Sikasso                    | 0.92 (0.66, 1.29)          | 0.91 (0.58, 1.43)        | 0.30 (0.21, 0.42)          | 0.71 (0.48, 1.04)        |
| Koulikoro                  | 1.08 (0.79, 1.49)          | 1.20 (0.79, 1.83)        | 0.33 (0.25, 0.44)          | 0.74 (0.52, 1.06)        |
| Segou                      | 0.84 (0.56, 1.24)          | 0.94 (0.60, 1.50)        | 0.33 (0.24, 0.46)          | 0.89 (0.62, 1.27)        |
| Mopti                      | 1.25 (0.89, 1.75)          | 1.64 (1.01, 2.66)        | 0.36 (0.26, 0.49)          | 1.06 (0.63, 1.77)        |
| <b>Level of Education</b>  |                            |                          |                            |                          |
| No Education (Reference)   | 1.00                       | 1.00                     | 1.00                       | 1.00                     |
| Primary                    | 0.89 (0.61, 1.31)          | 0.75 (0.52, 1.10)        | 1.93 (1.52, 2.46)          | 1.62 (1.23, 2.15)        |
| Secondary                  | 0.98 (0.74, 1.30)          | 0.57 (0.38, 0.84)        | 1.45 (1.14, 1.84)          | 1.37 (0.95, 1.99)        |
| Higher                     | 1.39 (0.62, 3.11)          | 0.83 (0.28, 2.45)        | 1.34 (0.72, 2.48)          | 0.73 (0.38, 1.38)        |



| VARIABLES                         | UNDERWEIGHT                |                          | OVERWEIGHT/OBESITY         |                          |
|-----------------------------------|----------------------------|--------------------------|----------------------------|--------------------------|
|                                   | Unadjusted<br>RRR (95% CI) | Adjusted<br>RRR (95% CI) | Unadjusted<br>RRR (95% CI) | Adjusted<br>RRR (95% CI) |
| <b>Wealth Quintile</b>            |                            |                          |                            |                          |
| Poorest (Reference)               | 1.00                       | 1.00                     | 1.00                       | 1.00                     |
| Poorer                            | 0.97 (0.71, 1.34)          | 1.00 (0.72, 1.40)        | 0.91 (0.65, 1.28)          | 0.89 (0.63, 1.27)        |
| Middle                            | 1.05 (0.76, 1.46)          | 1.06 (0.76, 1.48)        | 0.93 (0.65, 1.33)          | 0.92 (0.62, 1.35)        |
| Richer                            | 1.02 (0.72, 1.44)          | 1.15 (0.76, 1.73)        | 1.72 (1.23, 2.40)          | 1.57 (1.06, 2.31)        |
| Richest                           | 0.96 (0.71, 1.29)          | 0.99 (0.58, 1.69)        | 3.84 (2.86, 5.16)          | 2.96 (1.85, 4.76)        |
| <b>Occupation</b>                 |                            |                          |                            |                          |
| Not Working (Reference)           | 1.00                       | 1.00                     | 1.00                       | 1.00                     |
| Nonmanual                         | 0.53 (0.38, 0.74)          | 0.57 (0.41, 0.80)        | 1.90 (1.48, 2.43)          | 1.17 (0.90, 1.50)        |
| Agricultural                      | 0.82 (0.60, 1.11)          | 0.87 (0.63, 1.20)        | 0.69 (0.49, 0.96)          | 0.89 (0.61, 1.31)        |
| Don't Know                        | 0.83 (0.59, 1.17)          | 0.89 (0.63, 1.26)        | 1.49 (1.17, 1.90)          | 1.20 (0.93, 1.56)        |
| <b>Media Exposure</b>             |                            |                          |                            |                          |
| Not Exposed (Reference)           | 1.00                       | 1.00                     | 1.00                       | 1.00                     |
| Exposed to one media source       | 0.96 (0.73, 1.27)          | 0.97 (0.74, 1.27)        | 1.14 (0.89, 1.47)          | 1.02 (0.78, 1.33)        |
| Exposed to two media sources      | 0.87 (0.66, 1.15)          | 0.88 (0.65, 1.18)        | 1.84 (1.44, 2.37)          | 1.05 (0.79, 1.39)        |
| Exposed to three media sources    | 1.04 (0.70, 1.56)          | 1.09 (0.60, 1.99)        | 2.30 (1.69, 3.13)          | 0.91 (0.61, 1.37)        |
| <b>Hormonal Contraceptive Use</b> |                            |                          |                            |                          |
| No (Reference)                    | 1.00                       | 1.00                     | 1.00                       | 1.00                     |
| Yes                               | 0.85 (0.60, 1.19)          | 1.12 (0.79, 1.59)        | 1.67 (1.30, 2.13)          | 0.99 (0.76, 1.28)        |

Overall Model Fit:  $F(88, 311) = 6.29, P=0.0000$ .

**Table S43:** Unadjusted and adjusted relative risk ratio, of underweight and overweight/obesity among women of child-bearing age in Gambia.

| VARIABLES                    | UNDERWEIGHT                |                          | OVERWEIGHT/OBESITY         |                          |
|------------------------------|----------------------------|--------------------------|----------------------------|--------------------------|
|                              | Unadjusted<br>RRR (95% CI) | Adjusted<br>RRR (95% CI) | Unadjusted<br>RRR (95% CI) | Adjusted<br>RRR (95% CI) |
| <b>Age</b>                   |                            |                          |                            |                          |
| 15-19 (Reference)            | 1.00                       | 1.00                     | 1.00                       | 1.00                     |
| 20-24                        | 0.61 (0.44, 0.85)          | 0.92 (0.66, 1.30)        | 1.44 (1.00, 2.08)          | 1.44 (0.96, 2.16)        |
| 25-29                        | 0.55 (0.37, 0.82)          | 1.09 (0.65, 1.83)        | 3.10 (2.06, 4.68)          | 3.15 (1.89, 5.27)        |
| 30-34                        | 0.45 (0.31, 0.65)          | 1.02 (0.61, 1.69)        | 2.75 (1.83, 4.14)          | 3.28 (1.89, 5.68)        |
| 35-39                        | 0.38 (0.23, 0.63)          | 0.92 (0.48, 1.79)        | 4.97 (3.30, 7.50)          | 6.57 (3.64, 11.9)        |
| 40-44                        | 0.50 (0.30, 0.84)          | 1.30 (0.64, 2.66)        | 6.13 (3.88, 9.69)          | 8.71 (4.55, 16.7)        |
| 45-49                        | 0.41 (0.24, 0.69)          | 0.99 (0.47, 2.07)        | 5.87 (3.63, 9.48)          | 8.52 (4.51, 16.1)        |
| <b>Ethnicity</b>             |                            |                          |                            |                          |
| Mandinka/Jahanka (Reference) | 1.00                       | 1.00                     | 1.00                       | 1.00                     |
| Wollof                       | 0.98 (0.63, 1.50)          | 0.95 (0.61, 1.47)        | 1.09 (0.77, 1.55)          | 1.12 (0.74, 1.70)        |
| Jola/Karoninka               | 0.61 (0.39, 0.98)          | 0.63 (0.37, 1.06)        | 1.35 (0.93, 1.97)          | 0.96 (0.62, 1.50)        |
| Fula/Tukulur/Lorobo          | 1.35 (1.00, 1.82)          | 1.34 (1.00, 1.79)        | 1.02 (0.78, 1.34)          | 1.14 (0.86, 1.52)        |
| Serere                       | 1.00 (0.49, 2.02)          | 1.15 (0.57, 2.33)        | 1.83 (1.08, 3.11)          | 1.14 (0.66, 1.99)        |
| Serahuleh                    | 0.86 (0.53, 1.38)          | 0.99 (0.58, 1.70)        | 1.12 (0.74, 1.67)          | 1.15 (0.76, 1.75)        |
| Others                       | 1.07 (0.62, 1.84)          | 1.03 (0.46, 2.30)        | 1.27 (0.76, 2.14)          | 1.10 (0.58, 2.07)        |
| Non-Gambian                  | 0.53 (0.26, 1.09)          | 0.64 (0.29, 1.40)        | 1.60 (0.97, 2.63)          | 1.43 (0.85, 2.41)        |
| <b>Religion</b>              |                            |                          |                            |                          |
| Islam (Reference)            | 1.00                       | 1.00                     | 1.00                       | 1.00                     |
| Christians                   | 0.93 (0.54, 1.61)          | 1.12 (0.49, 2.57)        | 1.14 (0.68, 1.90)          | 0.61 (0.33, 1.13)        |
| <b>Parity</b>                |                            |                          |                            |                          |
| 0 (Reference)                | 1.00                       | 1.00                     | 1.00                       | 1.00                     |
| 1                            | 0.64 (0.45, 0.93)          | 1.15 (0.73, 1.81)        | 1.41 (1.00, 1.98)          | 1.13 (0.68, 1.88)        |
| 2                            | 0.57 (0.38, 0.84)          | 1.12 (0.62, 2.03)        | 1.34 (0.93, 1.92)          | 0.90 (0.49, 1.67)        |
| 3                            | 0.57 (0.37, 0.89)          | 1.00 (0.55, 1.81)        | 2.35 (1.55, 3.55)          | 1.47 (0.79, 2.75)        |
| 4                            | 0.68 (0.44, 1.05)          | 1.15 (0.59, 2.26)        | 3.05 (2.01, 4.62)          | 1.60 (0.92, 2.76)        |
| 5                            | 0.36 (0.20, 0.64)          | 0.59 (0.29, 1.21)        | 1.88 (1.17, 3.03)          | 0.85 (0.43, 1.69)        |
| 6+                           | 0.44 (0.33, 0.60)          | 0.65 (0.35, 1.21)        | 2.46 (1.74, 3.47)          | 0.98 (0.52, 1.86)        |
| <b>Marital Status</b>        |                            |                          |                            |                          |
| Single (Reference)           | 1.00                       | 1.00                     | 1.00                       | 1.00                     |
| Married                      | 0.48 (0.39, 0.60)          | 0.45 (0.31, 0.65)        | 1.67 (1.26, 2.22)          | 0.69 (0.42, 1.12)        |
| Formerly Married             | 0.24 (0.13, 0.46)          | 0.25 (0.12, 0.49)        | 3.32 (2.33, 4.73)          | 0.95 (0.56, 1.61)        |
| <b>Residential Setting</b>   |                            |                          |                            |                          |
| Rural (Reference)            | 1.00                       | 1.00                     | 1.00                       | 1.00                     |
| Urban                        | 0.78 (0.61, 1.00)          | 1.23 (0.81, 1.88)        | 1.79 (1.46, 2.19)          | 0.76 (0.48, 1.20)        |
| <b>Region</b>                |                            |                          |                            |                          |
| Banjul (Reference)           | 1.00                       | 1.00                     | 1.00                       | 1.00                     |
| Kanifing                     | 0.80 (0.53, 1.21)          | 0.77 (0.49, 1.20)        | 0.72 (0.54, 0.96)          | 0.85 (0.62, 1.18)        |
| Brikama                      | 1.05 (0.69, 1.60)          | 0.99 (0.59, 1.64)        | 0.42 (0.31, 0.56)          | 0.56 (0.40, 0.78)        |
| Mansakonko                   | 1.50 (0.99, 2.28)          | 1.22 (0.68, 2.21)        | 0.36 (0.25, 0.53)          | 0.58 (0.34, 0.98)        |
| Kerewan                      | 1.44 (0.99, 2.08)          | 1.10 (0.64, 1.90)        | 0.30 (0.21, 0.42)          | 0.50 (0.29, 0.87)        |
| Kuntaur                      | 1.16 (0.77, 1.76)          | 0.88 (0.48, 1.61)        | 0.27 (0.18, 0.41)          | 0.44 (0.24, 0.81)        |
| Janjanbureh                  | 1.77 (1.14, 2.73)          | 1.30 (0.71, 2.39)        | 0.41 (0.30, 0.58)          | 0.71 (0.43, 1.18)        |
| Base                         | 1.03 (0.67, 1.58)          | 0.79 (0.41, 1.50)        | 0.27 (0.18, 0.40)          | 0.41 (0.23, 0.76)        |
| <b>Level of Education</b>    |                            |                          |                            |                          |
| No Education (Reference)     | 1.00                       | 1.00                     | 1.00                       | 1.00                     |
| Primary                      | 0.88 (0.63, 1.22)          | 0.70 (0.49, 1.01)        | 0.83 (0.64, 1.09)          | 1.18 (0.86, 1.62)        |
| Secondary                    | 1.32 (1.01, 1.72)          | 0.95 (0.67, 1.35)        | 0.90 (0.72, 1.14)          | 1.24 (0.85, 1.82)        |
| Higher                       | 0.51 (0.27, 0.96)          | 0.42 (0.20, 0.90)        | 1.26 (0.80, 1.99)          | 1.24 (0.69, 2.24)        |

| VARIABLES                         | UNDERWEIGHT                |                          | OVERWEIGHT/OBESITY         |                          |
|-----------------------------------|----------------------------|--------------------------|----------------------------|--------------------------|
|                                   | Unadjusted<br>RRR (95% CI) | Adjusted<br>RRR (95% CI) | Unadjusted<br>RRR (95% CI) | Adjusted<br>RRR (95% CI) |
| <b>Wealth Quintile</b>            |                            |                          |                            |                          |
| Poorest (Reference)               | 1.00                       | 1.00                     | 1.00                       | 1.00                     |
| Poorer                            | 1.22 (0.92, 1.61)          | 1.23 (0.92, 1.64)        | 1.01 (0.68, 1.49)          | 0.99 (0.66, 1.48)        |
| Middle                            | 1.14 (0.81, 1.59)          | 1.13 (0.80, 1.59)        | 1.55 (1.14, 2.12)          | 1.64 (1.15, 2.34)        |
| Richer                            | 0.80 (0.56, 1.14)          | 0.79 (0.48, 1.29)        | 2.01 (1.47, 2.74)          | 1.88 (1.25, 2.83)        |
| Richest                           | 0.70 (0.49, 1.01)          | 0.67 (0.38, 1.19)        | 2.18 (1.59, 2.97)          | 1.95 (1.20, 3.16)        |
| <b>Occupation</b>                 |                            |                          |                            |                          |
| Not Working (Reference)           | 1.00                       | 1.00                     | 1.00                       | 1.00                     |
| Nonmanual                         | 0.59 (0.43, 0.82)          | 0.86 (0.60, 1.24)        | 2.32 (1.82, 2.95)          | 1.41 (1.07, 1.87)        |
| Manual                            | 0.38 (0.13, 1.06)          | 0.53 (0.18, 1.58)        | 2.77 (1.70, 4.52)          | 1.88 (1.16, 3.04)        |
| Agricultural                      | 0.91 (0.71, 1.18)          | 1.13 (0.82, 1.57)        | 0.93 (0.74, 1.17)          | 0.88 (0.66, 1.17)        |
| <b>Media Exposure</b>             |                            |                          |                            |                          |
| Not Exposed (Reference)           | 1.00                       | 1.00                     | 1.00                       | 1.00                     |
| Exposed to one media source       | 0.81 (0.58, 1.14)          | 0.88 (0.63, 1.24)        | 1.09 (0.68, 1.73)          | 1.11 (0.69, 1.79)        |
| Exposed to two media sources      | 0.68 (0.46, 1.00)          | 0.77 (0.52, 1.12)        | 1.34 (0.84, 2.14)          | 1.12 (0.66, 1.89)        |
| Exposed to three media sources    | 0.78 (0.50, 1.22)          | 0.96 (0.56, 1.65)        | 1.54 (0.94, 2.50)          | 0.96 (0.50, 1.87)        |
| <b>Hormonal Contraceptive Use</b> |                            |                          |                            |                          |
| No (Reference)                    | 1.00                       | 1.00                     | 1.00                       | 1.00                     |
| Yes                               | 0.31 (0.15, 0.64)          | 0.48 (0.22, 1.03)        | 1.57 (1.09, 2.26)          | 1.03 (0.72, 1.48)        |

Overall Model Fit:  $F(88, 180) = 8.63, P=0.0000$ .

**Table S44:** Unadjusted and adjusted relative risk ratio, of underweight and overweight/obesity among women of child-bearing age in Uganda.

| VARIABLES                  | UNDERWEIGHT                |                          | OVERWEIGHT/OBESITY         |                          |
|----------------------------|----------------------------|--------------------------|----------------------------|--------------------------|
|                            | Unadjusted<br>RRR (95% CI) | Adjusted<br>RRR (95% CI) | Unadjusted<br>RRR (95% CI) | Adjusted<br>RRR (95% CI) |
| <b>Age</b>                 |                            |                          |                            |                          |
| 15-19 (Reference)          | 1.00                       | 1.00                     | 1.00                       | 1.00                     |
| 20-24                      | 0.77 (0.46, 1.27)          | 0.81 (0.45, 1.43)        | 1.20 (0.74, 1.95)          | 0.93 (0.53, 1.62)        |
| 25-29                      | 0.64 (0.42, 0.99)          | 0.67 (0.34, 1.30)        | 1.45 (0.95, 2.20)          | 1.27 (0.72, 2.25)        |
| 30-34                      | 0.77 (0.45, 1.30)          | 0.85 (0.38, 1.89)        | 2.39 (1.59, 3.58)          | 2.55 (1.34, 4.84)        |
| 35-39                      | 0.85 (0.49, 1.47)          | 0.83 (0.34, 2.05)        | 2.25 (1.45, 3.48)          | 3.10 (1.48, 6.52)        |
| 40-44                      | 1.22 (0.72, 2.07)          | 1.24 (0.55, 2.78)        | 2.53 (1.53, 4.19)          | 4.04 (1.89, 8.64)        |
| 45-49                      | 1.13 (0.67, 1.90)          | 0.96 (0.35, 2.63)        | 3.40 (2.11, 5.47)          | 4.99 (2.31, 10.8)        |
| <b>Ethnicity</b>           |                            |                          |                            |                          |
| Baganda (Reference)        | 1.00                       | 1.00                     | 1.00                       | 1.00                     |
| Banyankole                 | 0.64 (0.25, 1.62)          | 0.87 (0.33, 2.30)        | 0.59 (0.36, 0.97)          | 0.99 (0.52, 1.86)        |
| Basoga                     | 0.96 (0.44, 2.09)          | 0.55 (0.22, 1.35)        | 0.41 (0.24, 0.70)          | 0.55 (0.25, 1.21)        |
| Bakiga                     | 1.33 (0.63, 2.80)          | 2.06 (0.84, 5.04)        | 0.80 (0.47, 1.35)          | 1.21 (0.60, 2.41)        |
| Iteso                      | 3.63 (1.88, 7.01)          | 2.01 (0.82, 4.97)        | 0.33 (0.18, 0.62)          | 0.94 (0.39, 2.29)        |
| Others                     | 2.14 (1.27, 3.59)          | 1.45 (0.74, 2.85)        | 0.35 (0.24, 0.51)          | 0.66 (0.40, 1.09)        |
| <b>Religion</b>            |                            |                          |                            |                          |
| Catholics (Reference)      | 1.00                       | 1.00                     | 1.00                       | 1.00                     |
| Other Christians           | 0.84 (0.61, 1.15)          | 1.03 (0.72, 1.49)        | 1.31 (0.99, 1.72)          | 1.13 (0.83, 1.53)        |
| Islam                      | 0.61 (0.37, 0.99)          | 0.76 (0.45, 1.28)        | 1.67 (1.13, 2.48)          | 1.29 (0.82, 2.02)        |
| Others                     | 0.68 (0.15, 3.06)          | 0.88 (0.16, 4.89)        | 1.88 (0.54, 6.58)          | 1.30 (0.36, 4.76)        |
| <b>Parity</b>              |                            |                          |                            |                          |
| 0 (Reference)              | 1.00                       | 1.00                     | 1.00                       | 1.00                     |
| 1                          | 0.59 (0.33, 1.05)          | 0.55 (0.22, 1.34)        | 1.73 (1.12, 2.67)          | 1.07 (0.63, 1.79)        |
| 2                          | 0.87 (0.50, 1.49)          | 0.76 (0.26, 2.19)        | 1.57 (0.98, 2.51)          | 0.75 (0.39, 1.44)        |
| 3                          | 0.82 (0.44, 1.51)          | 0.70 (0.21, 2.28)        | 1.10 (0.68, 1.78)          | 0.42 (0.21, 0.86)        |
| 4                          | 0.94 (0.54, 1.63)          | 0.73 (0.23, 2.29)        | 1.91 (1.24, 2.96)          | 0.77 (0.36, 1.68)        |
| 5                          | 0.94 (0.52, 1.70)          | 0.74 (0.23, 2.38)        | 1.86 (1.13, 3.05)          | 0.54 (0.24, 1.22)        |
| 6+                         | 0.93 (0.63, 1.37)          | 0.56 (0.18, 1.71)        | 1.40 (0.99, 1.98)          | 0.39 (0.19, 0.81)        |
| <b>Marital Status</b>      |                            |                          |                            |                          |
| Single (Reference)         | 1.00                       | 1.00                     | 1.00                       | 1.00                     |
| Married                    | 0.88 (0.63, 1.22)          | 1.10 (0.42, 2.87)        | 1.58 (1.17, 2.14)          | 2.03 (1.11, 3.70)        |
| Formerly Married           | 1.21 (0.76, 1.92)          | 1.51 (0.57, 3.97)        | 1.80 (1.20, 2.69)          | 1.72 (0.85, 3.47)        |
| <b>Residential Setting</b> |                            |                          |                            |                          |
| Rural (Reference)          | 1.00                       | 1.00                     | 1.00                       | 1.00                     |
| Urban                      | 0.74 (0.52, 1.05)          | 1.10 (0.66, 1.82)        | 3.04 (2.33, 3.96)          | 1.57 (1.00, 2.46)        |
| <b>Region</b>              |                            |                          |                            |                          |
| Kampala (Reference)        | 1.00                       | 1.00                     | 1.00                       | 1.00                     |
| Central 1                  | 0.71 (0.27, 1.86)          | 0.46 (0.17, 1.26)        | 0.44 (0.25, 0.76)          | 0.86 (0.47, 1.57)        |
| Central 2                  | 0.79 (0.37, 1.69)          | 0.48 (0.21, 1.12)        | 0.36 (0.21, 0.61)          | 0.70 (0.39, 1.23)        |
| East central               | 1.15 (0.60, 2.20)          | 0.99 (0.39, 2.46)        | 0.29 (0.17, 0.48)          | 0.86 (0.40, 1.86)        |
| Eastern                    | 1.95 (1.08, 3.51)          | 0.61 (0.24, 1.52)        | 0.17 (0.10, 0.30)          | 0.65 (0.28, 1.50)        |
| North                      | 1.45 (0.78, 2.70)          | 0.45 (0.17, 1.16)        | 0.12 (0.07, 0.22)          | 0.51 (0.24, 1.05)        |
| Karamoja                   | 3.32 (1.57, 7.04)          | 0.90 (0.29, 2.82)        | 0.02 (0.01, 0.09)          | 0.10 (0.02, 0.50)        |
| West Nile                  | 1.84 (1.00, 3.40)          | 0.57 (0.23, 1.43)        | 0.07 (0.04, 0.14)          | 0.25 (0.11, 0.57)        |
| Western                    | 0.76 (0.38, 1.52)          | 0.34 (0.14, 0.84)        | 0.42 (0.26, 0.68)          | 1.30 (0.72, 2.37)        |
| South west                 | 0.41 (0.18, 0.95)          | 0.19 (0.07, 0.50)        | 0.38 (0.24, 0.60)          | 1.01 (0.49, 2.10)        |

| VARIABLES                         | UNDERWEIGHT                |                          | OVERWEIGHT/OBESITY         |                          |
|-----------------------------------|----------------------------|--------------------------|----------------------------|--------------------------|
|                                   | Unadjusted<br>RRR (95% CI) | Adjusted<br>RRR (95% CI) | Unadjusted<br>RRR (95% CI) | Adjusted<br>RRR (95% CI) |
| <b>Level of Education</b>         |                            |                          |                            |                          |
| No Education (Reference)          | 1.00                       | 1.00                     | 1.00                       | 1.00                     |
| Primary                           | 0.58 (0.37, 0.91)          | 0.64 (0.38, 1.06)        | 0.89 (0.57, 1.39)          | 0.84 (0.50, 1.43)        |
| Secondary                         | 0.28 (0.16, 0.50)          | 0.43 (0.21, 0.89)        | 1.20 (0.75, 1.92)          | 0.63 (0.33, 1.20)        |
| Higher                            | 0.41 (0.18, 0.90)          | 0.73 (0.29, 1.89)        | 3.18 (1.74, 5.84)          | 0.96 (0.47, 1.96)        |
| <b>Wealth Quintile</b>            |                            |                          |                            |                          |
| Poorest (Reference)               | 1.00                       | 1.00                     | 1.00                       | 1.00                     |
| Poorer                            | 0.80 (0.52, 1.24)          | 1.04 (0.63, 1.72)        | 1.61 (0.78, 3.30)          | 1.21 (0.58, 2.54)        |
| Middle                            | 0.37 (0.22, 0.62)          | 0.58 (0.31, 1.09)        | 2.29 (1.23, 4.28)          | 1.39 (0.72, 2.68)        |
| Richer                            | 0.36 (0.22, 0.59)          | 0.61 (0.32, 1.16)        | 4.57 (2.52, 8.29)          | 2.66 (1.37, 5.16)        |
| Richest                           | 0.31 (0.19, 0.51)          | 0.47 (0.19, 1.16)        | 7.61 (4.28, 13.5)          | 3.12 (1.43, 6.81)        |
| <b>Occupation</b>                 |                            |                          |                            |                          |
| Not Working (Reference)           | 1.00                       | 1.00                     | 1.00                       | 1.00                     |
| Nonmanual                         | 0.87 (0.57, 1.32)          | 0.93 (0.58, 1.49)        | 2.28 (1.64, 3.17)          | 1.39 (0.94, 2.05)        |
| Agricultural                      | 0.96 (0.66, 1.39)          | 0.86 (0.57, 1.30)        | 0.93 (0.66, 1.32)          | 0.79 (0.53, 1.17)        |
| <b>Media Exposure</b>             |                            |                          |                            |                          |
| Not Exposed (Reference)           | 1.00                       | 1.00                     | 1.00                       | 1.00                     |
| Exposed to one media source       | 0.69 (0.46, 1.02)          | 0.91 (0.60, 1.39)        | 1.63 (0.99, 2.68)          | 1.27 (0.76, 2.14)        |
| Exposed to two media sources      | 0.56 (0.35, 0.90)          | 0.83 (0.48, 1.45)        | 2.28 (1.31, 3.96)          | 1.25 (0.69, 2.24)        |
| Exposed to three media sources    | 0.36 (0.20, 0.66)          | 0.65 (0.30, 1.41)        | 4.13 (2.39, 7.13)          | 1.36 (0.74, 2.52)        |
| <b>Hormonal Contraceptive Use</b> |                            |                          |                            |                          |
| No (Reference)                    | 1.00                       | 1.00                     | 1.00                       | 1.00                     |
| Yes                               | 0.44 (0.27, 0.70)          | 0.58 (0.34, 0.97)        | 1.06 (0.78, 1.45)          | 0.82 (0.56, 1.20)        |

Overall Model Fit:  $F(90, 304) = 5.07, P=0.0000$ .

**Table S45:** Unadjusted and adjusted relative risk ratio, of underweight and overweight/obesity among women of child-bearing age in Guinea.

| VARIABLES                    | UNDERWEIGHT                |                          | OVERWEIGHT/OBESITY         |                          |
|------------------------------|----------------------------|--------------------------|----------------------------|--------------------------|
|                              | Unadjusted<br>RRR (95% CI) | Adjusted<br>RRR (95% CI) | Unadjusted<br>RRR (95% CI) | Adjusted<br>RRR (95% CI) |
| <b>Age</b>                   |                            |                          |                            |                          |
| 15-19 (Reference)            | 1.00                       | 1.00                     | 1.00                       | 1.00                     |
| 20-24                        | 0.66 (0.48, 0.91)          | 0.86 (0.59, 1.25)        | 1.82 (1.33, 2.48)          | 2.01 (1.39, 2.91)        |
| 25-29                        | 0.47 (0.32, 0.69)          | 0.69 (0.44, 1.07)        | 2.56 (1.73, 3.77)          | 3.59 (2.06, 6.26)        |
| 30-34                        | 0.49 (0.33, 0.74)          | 0.82 (0.48, 1.40)        | 2.88 (1.95, 4.24)          | 4.42 (2.38, 8.20)        |
| 35-39                        | 0.52 (0.36, 0.76)          | 0.91 (0.55, 1.50)        | 3.79 (2.69, 5.35)          | 6.62 (3.73, 11.73)       |
| 40-44                        | 0.72 (0.49, 1.05)          | 1.23 (0.71, 2.13)        | 3.86 (2.66, 5.62)          | 7.74 (4.24, 14.13)       |
| 45-49                        | 0.59 (0.38, 0.90)          | 0.90 (0.50, 1.62)        | 3.98 (2.75, 5.75)          | 9.20 (4.82, 17.56)       |
| <b>Ethnicity</b>             |                            |                          |                            |                          |
| Peulh (Reference)            | 1.00                       | 1.00                     | 1.00                       | 1.00                     |
| Soussou                      | 0.54 (0.39, 0.76)          | 0.63 (0.42, 0.96)        | 2.27 (1.67, 3.10)          | 1.80 (1.32, 2.46)        |
| Malinké                      | 0.78 (0.60, 1.01)          | 0.83 (0.57, 1.22)        | 1.41 (1.11, 1.81)          | 1.54 (1.10, 2.15)        |
| Kissi                        | 0.54 (0.31, 0.94)          | 0.22 (0.08, 0.66)        | 0.87 (0.54, 1.41)          | 1.95 (0.81, 4.69)        |
| Toma                         | 0.31 (0.14, 0.68)          | 0.08 (0.02, 0.41)        | 0.88 (0.27, 2.84)          | 1.84 (0.39, 8.64)        |
| Guerzé                       | 0.31 (0.12, 0.83)          | 0.14 (0.04, 0.45)        | 1.23 (0.85, 1.79)          | 1.64 (0.74, 3.66)        |
| Autre/Manquant               | 0.66 (0.41, 1.06)          | 0.50 (0.24, 1.06)        | 1.78 (1.00, 3.19)          | 1.83 (0.99, 3.41)        |
| <b>Religion</b>              |                            |                          |                            |                          |
| Other Christians (Reference) | 1.00                       | 1.00                     | 1.00                       | 1.00                     |
| Islam                        | 1.69 (0.96, 2.96)          | 0.35 (0.14, 0.84)        | 1.42 (1.01, 2.01)          | 1.48 (0.71, 3.07)        |
| No Religion                  | 1.01 (0.39, 2.62)          | 1.63 (0.44, 6.09)        | 1.03 (0.52, 2.05)          | 1.66 (0.76, 3.66)        |
| <b>Parity</b>                |                            |                          |                            |                          |
| 0 (Reference)                | 1.00                       | 1.00                     | 1.00                       | 1.00                     |
| 1                            | 0.69 (0.48, 0.97)          | 0.80 (0.51, 1.24)        | 1.06 (0.76, 1.49)          | 0.76 (0.48, 1.21)        |
| 2                            | 0.68 (0.47, 1.00)          | 0.83 (0.51, 1.36)        | 1.39 (1.03, 1.87)          | 0.77 (0.49, 1.23)        |
| 3                            | 0.56 (0.36, 0.86)          | 0.69 (0.40, 1.19)        | 1.35 (0.96, 1.89)          | 0.56 (0.33, 0.95)        |
| 4                            | 0.62 (0.40, 0.95)          | 0.74 (0.40, 1.35)        | 1.28 (0.84, 1.96)          | 0.50 (0.27, 0.92)        |
| 5                            | 0.37 (0.21, 0.67)          | 0.40 (0.19, 0.83)        | 1.97 (1.35, 2.86)          | 0.79 (0.43, 1.45)        |
| 6+                           | 0.62 (0.46, 0.83)          | 0.56 (0.34, 0.95)        | 1.06 (0.76, 1.49)          | 0.52 (0.30, 0.93)        |
| <b>Marital Status</b>        |                            |                          |                            |                          |
| Single (Reference)           | 1.00                       | 1.00                     | 1.00                       | 1.00                     |
| Married                      | 0.65 (0.51, 0.83)          | 0.76 (0.53, 1.09)        | 1.56 (1.15, 2.12)          | 1.82 (1.12, 2.96)        |
| Formerly Married             | 0.61 (0.30, 1.22)          | 0.76 (0.36, 1.60)        | 1.45 (0.82, 2.55)          | 1.02 (0.50, 2.09)        |
| <b>Residential Setting</b>   |                            |                          |                            |                          |
| Rural (Reference)            | 1.00                       | 1.00                     | 1.00                       | 1.00                     |
| Urban                        | 0.91 (0.69, 1.19)          | 1.11 (0.68, 1.80)        | 3.39 (2.70, 4.25)          | 1.29 (0.92, 1.81)        |
| <b>Region</b>                |                            |                          |                            |                          |
| Conakry (Reference)          | 1.00                       | 1.00                     | 1.00                       | 1.00                     |
| Boké                         | 0.97 (0.63, 1.48)          | 0.98 (0.56, 1.70)        | 0.51 (0.36, 0.73)          | 0.83 (0.56, 1.24)        |
| Faranah                      | 0.95 (0.59, 1.52)          | 0.90 (0.43, 1.86)        | 0.25 (0.16, 0.37)          | 0.60 (0.36, 0.99)        |
| Kankan                       | 1.12 (0.71, 1.77)          | 1.07 (0.52, 2.22)        | 0.31 (0.20, 0.49)          | 0.75 (0.45, 1.25)        |
| Kindia                       | 0.74 (0.46, 1.19)          | 0.90 (0.51, 1.60)        | 0.35 (0.23, 0.52)          | 0.49 (0.30, 0.79)        |
| Labé                         | 1.23 (0.83, 1.83)          | 1.00 (0.55, 1.82)        | 0.20 (0.13, 0.30)          | 0.61 (0.35, 1.05)        |
| Mamou                        | 1.63 (1.06, 2.51)          | 1.44 (0.79, 2.62)        | 0.25 (0.17, 0.37)          | 0.61 (0.36, 1.02)        |
| N'Zérékoré                   | 0.59 (0.36, 0.98)          | 0.67 (0.30, 1.49)        | 0.32 (0.23, 0.44)          | 0.74 (0.48, 1.15)        |
| <b>Level of Education</b>    |                            |                          |                            |                          |
| No Education (Reference)     | 1.00                       | 1.00                     | 1.00                       | 1.00                     |
| Primary                      | 1.10 (0.81, 1.49)          | 1.02 (0.74, 1.42)        | 1.20 (0.93, 1.55)          | 1.07 (0.81, 1.42)        |
| Secondary                    | 1.12 (0.79, 1.60)          | 0.94 (0.63, 1.41)        | 1.84 (1.37, 2.48)          | 1.44 (1.03, 2.01)        |
| Higher                       | 0.71 (0.34, 1.48)          | 0.63 (0.24, 1.66)        | 1.66 (0.98, 2.84)          | 0.69 (0.34, 1.37)        |

| VARIABLES                         | UNDERWEIGHT                |                          | OVERWEIGHT/OBESITY         |                          |
|-----------------------------------|----------------------------|--------------------------|----------------------------|--------------------------|
|                                   | Unadjusted<br>RRR (95% CI) | Adjusted<br>RRR (95% CI) | Unadjusted<br>RRR (95% CI) | Adjusted<br>RRR (95% CI) |
| <b>Wealth Quintile</b>            |                            |                          |                            |                          |
| Poorest (Reference)               | 1.00                       | 1.00                     | 1.00                       | 1.00                     |
| Poorer                            | 0.77 (0.58, 1.03)          | 1.04 (0.79, 1.37)        | 1.35 (0.80, 2.27)          | 1.18 (0.71, 1.97)        |
| Middle                            | 0.61 (0.44, 0.85)          | 0.73 (0.52, 1.01)        | 2.87 (1.81, 4.56)          | 2.35 (1.50, 3.69)        |
| Richer                            | 0.56 (0.41, 0.76)          | 0.62 (0.42, 0.92)        | 4.30 (2.70, 6.84)          | 2.58 (1.53, 4.35)        |
| Richest                           | 0.75 (0.53, 1.05)          | 0.88 (0.47, 1.65)        | 7.34 (4.62, 11.7)          | 2.65 (1.47, 4.77)        |
| <b>Occupation</b>                 |                            |                          |                            |                          |
| Not Working (Reference)           | 1.00                       | 1.00                     | 1.00                       | 1.00                     |
| Nonmanual                         | 0.52 (0.37, 0.74)          | 0.77 (0.54, 1.11)        | 1.94 (1.51, 2.49)          | 0.98 (0.72, 1.34)        |
| Manual                            | 0.66 (0.42, 1.05)          | 0.71 (0.44, 1.15)        | 0.74 (0.44, 1.24)          | 0.63 (0.37, 1.08)        |
| Agricultural                      | 0.86 (0.65, 1.12)          | 1.10 (0.80, 1.51)        | 0.49 (0.36, 0.65)          | 0.61 (0.43, 0.86)        |
| <b>Media Exposure</b>             |                            |                          |                            |                          |
| Not Exposed (Reference)           | 1.00                       | 1.00                     | 1.00                       | 1.00                     |
| Exposed to one media source       | 0.95 (0.73, 1.23)          | 0.88 (0.67, 1.15)        | 1.43 (1.06, 1.93)          | 1.25 (0.92, 1.70)        |
| Exposed to two media sources      | 0.77 (0.57, 1.02)          | 0.74 (0.53, 1.03)        | 3.39 (2.63, 4.39)          | 1.72 (1.21, 2.44)        |
| Exposed to three media sources    | 1.01 (0.62, 1.66)          | 0.83 (0.44, 1.57)        | 3.55 (2.18, 5.80)          | 1.57 (0.78, 3.16)        |
| <b>Hormonal Contraceptive Use</b> |                            |                          |                            |                          |
| No (Reference)                    | 1.00                       | 1.00                     | 1.00                       | 1.00                     |
| Yes                               | 0.28 (0.11, 0.71)          | 0.35 (0.14, 0.91)        | 1.81 (1.13, 2.89)          | 1.22 (0.73, 2.03)        |

Overall Model Fit:  $F(88, 198) = 7.39, P=0.0000$ .

**Table S46:** Unadjusted and adjusted relative risk ratio, of underweight and overweight/obesity among women of child-bearing age in Senegal.

| VARIABLES                  | UNDERWEIGHT             |                       | OVERWEIGHT/OBESITY      |                       |
|----------------------------|-------------------------|-----------------------|-------------------------|-----------------------|
|                            | Unadjusted RRR (95% CI) | Adjusted RRR (95% CI) | Unadjusted RRR (95% CI) | Adjusted RRR (95% CI) |
| <b>Age</b>                 |                         |                       |                         |                       |
| 15-19 (Reference)          | 1.00                    | 1.00                  | 1.00                    | 1.00                  |
| 20-24                      | 0.83 (0.64, 1.07)       | 1.05 (0.80, 1.39)     | 2.07 (1.30, 3.28)       | 1.93 (1.19, 3.12)     |
| 25-29                      | 0.58 (0.42, 0.79)       | 0.88 (0.61, 1.27)     | 2.95 (1.74, 5.01)       | 2.60 (1.42, 4.76)     |
| 30-34                      | 0.50 (0.36, 0.68)       | 0.84 (0.56, 1.24)     | 4.19 (2.87, 6.13)       | 3.48 (2.14, 5.65)     |
| 35-39                      | 0.39 (0.27, 0.58)       | 0.71 (0.44, 1.14)     | 5.48 (3.66, 8.20)       | 4.97 (2.99, 8.25)     |
| 40-44                      | 0.28 (0.18, 0.43)       | 0.57 (0.34, 0.97)     | 6.65 (4.29, 10.3)       | 5.39 (3.11, 9.32)     |
| 45-49                      | 0.36 (0.23, 0.55)       | 0.70 (0.43, 1.15)     | 7.99 (4.81, 13.3)       | 6.63 (3.53, 12.4)     |
| <b>Ethnicity</b>           |                         |                       |                         |                       |
| Wolof (Reference)          | 1.00                    | 1.00                  | 1.00                    | 1.00                  |
| Poular                     | 1.01 (0.81, 1.27)       | 1.05 (0.78, 1.42)     | 0.74 (0.59, 0.93)       | 0.72 (0.54, 0.98)     |
| Serer                      | 0.76 (0.55, 1.04)       | 0.86 (0.61, 1.23)     | 0.60 (0.45, 0.80)       | 0.65 (0.46, 0.92)     |
| Mandingue                  | 0.52 (0.34, 0.79)       | 0.53 (0.32, 0.89)     | 1.18 (0.71, 1.96)       | 1.12 (0.60, 2.07)     |
| Diola                      | 0.34 (0.16, 0.73)       | 0.45 (0.16, 1.29)     | 0.74 (0.45, 1.20)       | 0.47 (0.23, 0.95)     |
| Soninke                    | 0.64 (0.35, 1.18)       | 0.63 (0.31, 1.29)     | 1.08 (0.62, 1.86)       | 1.08 (0.63, 1.84)     |
| Not a Senegalese           | 0.48 (0.17, 1.39)       | 0.52 (0.20, 1.39)     | 0.96 (0.49, 1.86)       | 0.97 (0.48, 1.97)     |
| Others                     | 0.67 (0.44, 1.03)       | 0.76 (0.48, 1.23)     | 0.96 (0.56, 1.65)       | 0.77 (0.42, 1.40)     |
| <b>Religion</b>            |                         |                       |                         |                       |
| Islam (Reference)          | 1.00                    | 1.00                  | 1.00                    | 1.00                  |
| Others                     | 0.46 (0.30, 0.70)       | 0.54 (0.35, 0.84)     | 0.79 (0.48, 1.30)       | 0.81 (0.41, 1.58)     |
| <b>Parity</b>              |                         |                       |                         |                       |
| 0 (Reference)              | 1.00                    | 1.00                  | 1.00                    | 1.00                  |
| 1                          | 0.75 (0.55, 1.03)       | 1.01 (0.70, 1.44)     | 1.86 (1.37, 2.52)       | 1.22 (0.78, 1.91)     |
| 2                          | 0.69 (0.51, 0.93)       | 0.95 (0.68, 1.33)     | 1.46 (0.99, 2.16)       | 0.85 (0.50, 1.44)     |
| 3                          | 0.62 (0.44, 0.87)       | 0.87 (0.57, 1.33)     | 2.34 (1.66, 3.30)       | 1.27 (0.73, 2.22)     |
| 4                          | 0.51 (0.36, 0.72)       | 0.72 (0.44, 1.20)     | 2.00 (1.42, 2.82)       | 0.97 (0.55, 1.71)     |
| 5                          | 0.43 (0.28, 0.67)       | 0.66 (0.38, 1.16)     | 2.54 (1.58, 4.09)       | 1.16 (0.61, 2.20)     |
| 6+                         | 0.37 (0.28, 0.49)       | 0.58 (0.38, 0.89)     | 2.68 (2.00, 3.59)       | 1.33 (0.80, 2.21)     |
| <b>Marital Status</b>      |                         |                       |                         |                       |
| Single (Reference)         | 1.00                    | 1.00                  | 1.00                    | 1.00                  |
| Married                    | 0.60 (0.50, 0.72)       | 0.67 (0.50, 0.89)     | 2.13 (1.64, 2.76)       | 1.20 (0.75, 1.92)     |
| Formerly Married           | 0.45 (0.28, 0.71)       | 0.53 (0.30, 0.93)     | 2.56 (1.72, 3.81)       | 1.01 (0.54, 1.87)     |
| <b>Residential Setting</b> |                         |                       |                         |                       |
| Rural (Reference)          | 1.00                    | 1.00                  | 1.00                    | 1.00                  |
| Urban                      | 0.80 (0.64, 1.01)       | 0.88 (0.68, 1.13)     | 2.35 (1.91, 2.89)       | 1.60 (1.22, 2.09)     |
| <b>Region</b>              |                         |                       |                         |                       |
| Dakar (Reference)          | 1.00                    | 1.00                  | 1.00                    | 1.00                  |
| Ziguinchor                 | 0.57 (0.35, 0.93)       | 0.63 (0.29, 1.33)     | 0.66 (0.43, 1.00)       | 1.63 (0.96, 2.76)     |
| Diourbel                   | 1.60 (1.01, 2.54)       | 1.22 (0.78, 1.92)     | 0.39 (0.27, 0.56)       | 0.61 (0.42, 0.89)     |
| Saint-Louis                | 1.10 (0.70, 1.71)       | 0.73 (0.46, 1.16)     | 0.57 (0.39, 0.84)       | 0.94 (0.60, 1.46)     |
| Tambacounda                | 1.40 (0.81, 2.42)       | 1.16 (0.66, 2.04)     | 0.54 (0.35, 0.83)       | 1.18 (0.68, 2.04)     |
| Kaolack                    | 0.90 (0.60, 1.34)       | 0.71 (0.46, 1.09)     | 0.37 (0.25, 0.55)       | 0.57 (0.36, 0.92)     |
| Thiès                      | 1.07 (0.66, 1.75)       | 0.80 (0.48, 1.34)     | 0.56 (0.40, 0.78)       | 0.81 (0.54, 1.21)     |
| Louga                      | 2.55 (1.67, 3.91)       | 1.89 (1.18, 3.00)     | 0.44 (0.28, 0.70)       | 0.78 (0.46, 1.31)     |
| Fatick                     | 0.74 (0.44, 1.25)       | 0.57 (0.32, 1.02)     | 0.43 (0.28, 0.67)       | 0.97 (0.60, 1.58)     |
| Kolda                      | 1.34 (0.82, 2.20)       | 1.06 (0.61, 1.84)     | 0.48 (0.31, 0.73)       | 1.13 (0.68, 1.88)     |
| Matam                      | 1.46 (0.96, 2.22)       | 1.01 (0.64, 1.61)     | 0.41 (0.28, 0.59)       | 0.77 (0.49, 1.22)     |
| Kaffrine                   | 1.19 (0.75, 1.87)       | 0.82 (0.49, 1.37)     | 0.32 (0.20, 0.50)       | 0.64 (0.37, 1.08)     |
| Kedougou                   | 0.71 (0.39, 1.30)       | 0.68 (0.34, 1.38)     | 0.21 (0.13, 0.34)       | 0.40 (0.22, 0.71)     |
| Sedhiou                    | 1.01 (0.63, 1.61)       | 1.06 (0.61, 1.86)     | 0.32 (0.21, 0.47)       | 0.62 (0.32, 1.22)     |



| VARIABLES                         | UNDERWEIGHT                |                          | OVERWEIGHT/OBESITY         |                          |
|-----------------------------------|----------------------------|--------------------------|----------------------------|--------------------------|
|                                   | Unadjusted<br>RRR (95% CI) | Adjusted<br>RRR (95% CI) | Unadjusted<br>RRR (95% CI) | Adjusted<br>RRR (95% CI) |
| <b>Level of Education</b>         |                            |                          |                            |                          |
| No Education (Reference)          | 1.00                       | 1.00                     | 1.00                       | 1.00                     |
| Primary                           | 0.93 (0.73, 1.18)          | 0.99 (0.76, 1.29)        | 1.31 (1.03, 1.66)          | 1.17 (0.84, 1.62)        |
| Secondary                         | 1.11 (0.86, 1.45)          | 1.09 (0.73, 1.65)        | 0.96 (0.72, 1.27)          | 1.27 (0.89, 1.81)        |
| Higher                            | 0.10 (0.03, 0.38)          | 0.13 (0.03, 0.53)        | 1.32 (0.65, 2.68)          | 0.87 (0.36, 2.08)        |
| <b>Wealth Quintile</b>            |                            |                          |                            |                          |
| Poorest (Reference)               | 1.00                       | 1.00                     | 1.00                       | 1.00                     |
| Poorer                            | 0.92 (0.71, 1.19)          | 0.99 (0.73, 1.34)        | 1.05 (0.79, 1.40)          | 0.98 (0.72, 1.32)        |
| Middle                            | 0.91 (0.70, 1.18)          | 0.98 (0.71, 1.35)        | 1.69 (1.26, 2.27)          | 1.22 (0.87, 1.72)        |
| Richer                            | 1.16 (0.88, 1.53)          | 1.37 (0.94, 1.99)        | 2.36 (1.79, 3.13)          | 1.38 (0.94, 2.01)        |
| Richest                           | 0.72 (0.52, 0.99)          | 0.84 (0.55, 1.28)        | 2.88 (2.05, 4.05)          | 1.67 (1.11, 2.51)        |
| <b>Occupation</b>                 |                            |                          |                            |                          |
| Not Working (Reference)           | 1.00                       | 1.00                     | 1.00                       | 1.00                     |
| Nonmanual                         | 0.65 (0.53, 0.79)          | 0.76 (0.61, 0.96)        | 2.58 (2.08, 3.20)          | 1.53 (1.17, 2.01)        |
| Manual                            | 0.48 (0.20, 1.15)          | 0.49 (0.21, 1.17)        | 1.18 (0.67, 2.10)          | 0.80 (0.42, 1.50)        |
| Agricultural                      | 0.81 (0.62, 1.04)          | 0.91 (0.69, 1.21)        | 1.08 (0.79, 1.48)          | 1.12 (0.78, 1.62)        |
| <b>Media Exposure</b>             |                            |                          |                            |                          |
| Not Exposed (Reference)           | 1.00                       | 1.00                     | 1.00                       | 1.00                     |
| Exposed to one media source       | 0.80 (0.58, 1.10)          | 0.76 (0.55, 1.04)        | 1.11 (0.79, 1.57)          | 0.95 (0.67, 1.35)        |
| Exposed to two media sources      | 0.83 (0.61, 1.13)          | 0.68 (0.49, 0.92)        | 1.88 (1.34, 2.62)          | 1.22 (0.84, 1.77)        |
| Exposed to three media sources    | 0.67 (0.45, 1.00)          | 0.51 (0.32, 0.82)        | 1.92 (1.24, 2.97)          | 1.08 (0.63, 1.86)        |
| <b>Hormonal Contraceptive Use</b> |                            |                          |                            |                          |
| No (Reference)                    | 1.00                       | 1.00                     | 1.00                       | 1.00                     |
| Yes                               | 0.49 (0.28, 0.85)          | 0.72 (0.42, 1.25)        | 1.63 (1.20, 2.20)          | 1.04 (0.70, 1.54)        |

Overall Model Fit:  $F(100, 263) = 10.15, P=0.0000$ .

**Table S47:** Unadjusted and adjusted relative risk ratio, of underweight and overweight/obesity among women of child-bearing age in Namibia.

| VARIABLES                  | UNDERWEIGHT                |                          | OVERWEIGHT/OBESITY         |                          |
|----------------------------|----------------------------|--------------------------|----------------------------|--------------------------|
|                            | Unadjusted<br>RRR (95% CI) | Adjusted<br>RRR (95% CI) | Unadjusted<br>RRR (95% CI) | Adjusted<br>RRR (95% CI) |
| <b>Age</b>                 |                            |                          |                            |                          |
| 15-19 (Reference)          | 1.00                       | 1.00                     | 1.00                       | 1.00                     |
| 20-24                      | 0.56 (0.42, 0.74)          | 0.84 (0.61, 1.15)        | 2.51 (1.66, 3.80)          | 1.53 (1.00, 2.33)        |
| 25-29                      | 0.40 (0.27, 0.59)          | 0.74 (0.46, 1.19)        | 5.06 (3.33, 7.68)          | 2.53 (1.66, 3.87)        |
| 30-34                      | 0.36 (0.23, 0.56)          | 0.67 (0.38, 1.18)        | 8.27 (5.55, 12.3)          | 4.32 (2.81, 6.63)        |
| 35-39                      | 0.57 (0.38, 0.85)          | 0.99 (0.58, 1.70)        | 8.77 (5.80, 13.2)          | 4.43 (2.74, 7.14)        |
| 40-44                      | 0.72 (0.47, 1.10)          | 1.05 (0.61, 1.81)        | 14.3 (9.14, 22.2)          | 7.65 (4.46, 13.1)        |
| 45-49                      | 0.60 (0.39, 0.94)          | 0.70 (0.39, 1.27)        | 11.1 (7.21, 17.1)          | 5.76 (3.40, 9.75)        |
| <b>Religion</b>            |                            |                          |                            |                          |
| Catholics (Reference)      | 1.00                       | 1.00                     | 1.00                       | 1.00                     |
| Other Christians           | 0.74 (0.56, 0.97)          | 0.72 (0.53, 0.98)        | 0.98 (0.79, 1.22)          | 0.83 (0.64, 1.07)        |
| Others                     | 0.60 (0.35, 1.03)          | 0.66 (0.37, 1.15)        | 1.36 (1.00, 1.84)          | 0.83 (0.58, 1.19)        |
| No Religion                | 0.46 (0.14, 1.49)          | 0.41 (0.12, 1.42)        | 1.35 (0.45, 4.03)          | 1.52 (0.54, 4.31)        |
| <b>Parity</b>              |                            |                          |                            |                          |
| 0 (Reference)              | 1.00                       | 1.00                     | 1.00                       | 1.00                     |
| 1                          | 0.57 (0.41, 0.79)          | 0.71 (0.49, 1.03)        | 3.08 (2.28, 4.16)          | 2.00 (1.42, 2.82)        |
| 2                          | 0.49 (0.35, 0.68)          | 0.58 (0.37, 0.90)        | 4.14 (3.14, 5.45)          | 1.93 (1.37, 2.73)        |
| 3                          | 0.37 (0.24, 0.58)          | 0.44 (0.26, 0.75)        | 4.47 (3.32, 6.02)          | 1.59 (1.05, 2.42)        |
| 4                          | 0.60 (0.37, 0.98)          | 0.64 (0.37, 1.10)        | 5.79 (4.13, 8.13)          | 2.17 (1.38, 3.41)        |
| 5                          | 0.72 (0.41, 1.27)          | 0.62 (0.33, 1.19)        | 6.12 (4.14, 9.04)          | 2.81 (1.64, 4.83)        |
| 6+                         | 1.08 (0.71, 1.64)          | 0.90 (0.48, 1.71)        | 3.51 (2.43, 5.08)          | 1.69 (0.97, 2.93)        |
| <b>Marital Status</b>      |                            |                          |                            |                          |
| Single (Reference)         | 1.00                       | 1.00                     | 1.00                       | 1.00                     |
| Married                    | 0.65 (0.50, 0.83)          | 0.86 (0.63, 1.18)        | 2.79 (2.34, 3.32)          | 1.52 (1.20, 1.93)        |
| Formerly Married           | 1.18 (0.75, 1.85)          | 1.46 (0.87, 2.46)        | 2.66 (1.96, 3.60)          | 1.33 (0.90, 1.96)        |
| <b>Residential Setting</b> |                            |                          |                            |                          |
| Rural (Reference)          | 1.00                       | 1.00                     | 1.00                       | 1.00                     |
| Urban                      | 0.75 (0.59, 0.97)          | 1.25 (0.91, 1.71)        | 2.23 (1.89, 2.63)          | 0.97 (0.76, 1.24)        |
| <b>Region</b>              |                            |                          |                            |                          |
| Khomas (Reference)         | 1.00                       | 1.00                     | 1.00                       | 1.00                     |
| Caprivi                    | 0.85 (0.45, 1.59)          | 0.79 (0.40, 1.58)        | 0.48 (0.32, 0.71)          | 0.69 (0.45, 1.06)        |
| Erongo                     | 0.72 (0.37, 1.41)          | 0.78 (0.39, 1.55)        | 1.08 (0.78, 1.49)          | 0.93 (0.66, 1.31)        |
| Hardap                     | 1.83 (1.01, 3.30)          | 1.74 (0.91, 3.34)        | 1.38 (0.96, 1.98)          | 1.25 (0.83, 1.90)        |
| Karas                      | 0.90 (0.49, 1.67)          | 0.87 (0.45, 1.68)        | 1.24 (0.93, 1.66)          | 1.03 (0.72, 1.47)        |
| Kavango                    | 1.29 (0.74, 2.27)          | 0.88 (0.45, 1.72)        | 0.33 (0.23, 0.46)          | 0.51 (0.35, 0.76)        |
| Kunene                     | 1.43 (0.71, 2.85)          | 1.42 (0.66, 3.06)        | 1.36 (0.93, 1.98)          | 1.72 (1.09, 2.70)        |
| Changwena                  | 1.94 (1.12, 3.36)          | 1.55 (0.83, 2.90)        | 0.29 (0.20, 0.42)          | 0.50 (0.31, 0.81)        |
| Omaheke                    | 1.37 (0.75, 2.48)          | 1.23 (0.63, 2.39)        | 0.98 (0.67, 1.44)          | 1.05 (0.64, 1.71)        |
| Omusati                    | 1.48 (0.85, 2.58)          | 1.06 (0.56, 2.01)        | 0.36 (0.25, 0.53)          | 0.58 (0.35, 0.96)        |
| Oshana                     | 1.27 (0.71, 2.27)          | 1.12 (0.60, 2.06)        | 0.63 (0.44, 0.91)          | 0.77 (0.51, 1.17)        |
| Oshikoto                   | 1.14 (0.63, 2.05)          | 0.99 (0.51, 1.89)        | 0.57 (0.42, 0.78)          | 0.84 (0.58, 1.20)        |
| Otjozondjupa               | 1.45 (0.76, 2.77)          | 1.29 (0.65, 2.57)        | 1.14 (0.83, 1.59)          | 0.96 (0.66, 1.41)        |
| <b>Level of Education</b>  |                            |                          |                            |                          |
| No Education (Reference)   | 1.00                       | 1.00                     | 1.00                       | 1.00                     |
| Primary                    | 1.52 (0.96, 2.40)          | 1.47 (0.90, 2.41)        | 0.68 (0.45, 1.05)          | 0.87 (0.54, 1.41)        |
| Secondary                  | 0.92 (0.58, 1.46)          | 1.03 (0.60, 1.74)        | 0.86 (0.58, 1.27)          | 0.93 (0.58, 1.48)        |
| Higher                     | 0.64 (0.33, 1.26)          | 0.85 (0.41, 1.79)        | 1.19 (0.75, 1.90)          | 0.96 (0.53, 1.75)        |

| VARIABLES                         | UNDERWEIGHT                |                          | OVERWEIGHT/OBESITY         |                          |
|-----------------------------------|----------------------------|--------------------------|----------------------------|--------------------------|
|                                   | Unadjusted<br>RRR (95% CI) | Adjusted<br>RRR (95% CI) | Unadjusted<br>RRR (95% CI) | Adjusted<br>RRR (95% CI) |
| <b>Wealth Quintile</b>            |                            |                          |                            |                          |
| Poorest (Reference)               | 1.00                       | 1.00                     | 1.00                       | 1.00                     |
| Poorer                            | 0.73 (0.53, 1.02)          | 0.82 (0.59, 1.16)        | 1.60 (1.12, 2.29)          | 1.33 (0.89, 1.99)        |
| Middle                            | 0.71 (0.50, 1.00)          | 0.81 (0.56, 1.19)        | 2.71 (1.94, 3.78)          | 2.08 (1.40, 3.09)        |
| Richer                            | 0.67 (0.48, 0.95)          | 0.82 (0.52, 1.31)        | 4.74 (3.46, 6.50)          | 3.58 (2.35, 5.44)        |
| Richest                           | 0.51 (0.34, 0.76)          | 0.62 (0.36, 1.07)        | 4.56 (3.30, 6.31)          | 3.52 (2.24, 5.53)        |
| <b>Occupation</b>                 |                            |                          |                            |                          |
| Not Working (Reference)           | 1.00                       | 1.00                     | 1.00                       | 1.00                     |
| Nonmanual                         | 0.55 (0.42, 0.71)          | 0.73 (0.54, 0.99)        | 2.86 (2.38, 3.42)          | 1.26 (1.01, 1.56)        |
| Manual                            | 0.51 (0.22, 1.21)          | 0.66 (0.29, 1.50)        | 2.74 (1.78, 4.21)          | 1.12 (0.68, 1.84)        |
| Agricultural                      | 0.82 (0.35, 1.91)          | 0.94 (0.40, 2.23)        | 1.70 (1.05, 2.78)          | 1.07 (0.60, 1.92)        |
| <b>Media Exposure</b>             |                            |                          |                            |                          |
| Not Exposed (Reference)           | 1.00                       | 1.00                     | 1.00                       | 1.00                     |
| Exposed to one media source       | 0.87 (0.62, 1.24)          | 0.96 (0.67, 1.37)        | 1.15 (0.78, 1.68)          | 1.20 (0.79, 1.83)        |
| Exposed to two media sources      | 0.93 (0.67, 1.29)          | 1.08 (0.74, 1.57)        | 1.72 (1.20, 2.45)          | 1.45 (0.95, 2.22)        |
| Exposed to three media sources    | 0.58 (0.40, 0.85)          | 0.75 (0.48, 1.19)        | 2.71 (1.96, 3.76)          | 1.68 (1.09, 2.59)        |
| <b>Hormonal Contraceptive Use</b> |                            |                          |                            |                          |
| No (Reference)                    | 1.00                       | 1.00                     | 1.00                       | 1.00                     |
| Yes                               | 0.54 (0.41, 0.71)          | 0.72 (0.54, 0.95)        | 1.41 (1.18, 1.68)          | 1.11 (0.89, 1.38)        |

Overall Model Fit:  $F(88, 431) = 8.68, P=0.0000$ .

**Table S48:** Unadjusted and adjusted relative risk ratio, of underweight and overweight/obesity among women of child-bearing age in Congo.

| VARIABLES                  | UNDERWEIGHT                |                          | OVERWEIGHT/OBESITY         |                          |
|----------------------------|----------------------------|--------------------------|----------------------------|--------------------------|
|                            | Unadjusted<br>RRR (95% CI) | Adjusted<br>RRR (95% CI) | Unadjusted<br>RRR (95% CI) | Adjusted<br>RRR (95% CI) |
| <b>Age</b>                 |                            |                          |                            |                          |
| 15-19 (Reference)          | 1.00                       | 1.00                     | 1.00                       | 1.00                     |
| 20-24                      | 0.56 (0.37, 0.84)          | 0.74 (0.45, 1.22)        | 2.95 (1.90, 4.57)          | 2.59 (1.55, 4.34)        |
| 25-29                      | 0.49 (0.32, 0.74)          | 0.69 (0.39, 1.21)        | 5.16 (3.31, 8.04)          | 4.59 (2.53, 8.31)        |
| 30-34                      | 0.60 (0.36, 1.00)          | 0.81 (0.44, 1.47)        | 9.56 (5.64, 16.2)          | 8.85 (4.61, 17.0)        |
| 35-39                      | 0.56 (0.37, 0.83)          | 0.73 (0.40, 1.34)        | 8.96 (5.33, 15.1)          | 9.06 (4.51, 18.2)        |
| 40-44                      | 0.85 (0.51, 1.42)          | 1.04 (0.57, 1.89)        | 9.50 (5.97, 15.1)          | 12.6 (6.29, 25.4)        |
| 45-49                      | 0.42 (0.25, 0.70)          | 0.50 (0.23, 1.12)        | 7.96 (4.89, 12.9)          | 12.9 (6.45, 25.8)        |
| <b>Ethnicity</b>           |                            |                          |                            |                          |
| Kongo (Reference)          | 1.00                       | 1.00                     | 1.00                       | 1.00                     |
| Punu                       | 1.11 (0.58, 2.14)          | 1.25 (0.60, 2.59)        | 0.88 (0.56, 1.38)          | 1.00 (0.59, 1.72)        |
| Duma                       | 0.84 (0.44, 1.60)          | 0.88 (0.49, 1.61)        | 0.40 (0.14, 1.09)          | 0.81 (0.28, 2.35)        |
| Mbéré/Mbéli/Kélé           | 0.47 (0.20, 1.12)          | 0.56 (0.24, 1.32)        | 1.10 (0.55, 2.20)          | 1.30 (0.53, 3.19)        |
| Téké                       | 0.99 (0.70, 1.40)          | 1.16 (0.78, 1.73)        | 1.07 (0.76, 1.51)          | 1.32 (0.85, 2.06)        |
| Mbochi                     | 1.22 (0.76, 1.96)          | 1.46 (0.80, 2.67)        | 0.90 (0.66, 1.22)          | 0.93 (0.65, 1.33)        |
| Sangha                     | 0.85 (0.43, 1.71)          | 1.96 (0.67, 5.76)        | 1.19 (0.73, 1.95)          | 2.17 (1.13, 4.17)        |
| Oubanguiens                | 0.45 (0.18, 1.15)          | 1.19 (0.38, 3.79)        | 0.84 (0.56, 1.26)          | 1.90 (1.03, 3.48)        |
| Pygmée                     | 1.54 (0.78, 3.04)          | 3.05 (1.39, 6.68)        | 0.15 (0.05, 0.46)          | 1.08 (0.32, 3.64)        |
| Etranger                   | 0.48 (0.23, 0.99)          | 0.65 (0.30, 1.38)        | 1.14 (0.81, 1.60)          | 1.45 (0.87, 2.45)        |
| Others                     | 1.22 (0.27, 5.42)          | 1.62 (0.28, 9.24)        | 1.49 (0.56, 3.97)          | 2.15 (0.91, 5.11)        |
| <b>Religion</b>            |                            |                          |                            |                          |
| Catholics (Reference)      | 1.00                       | 1.00                     | 1.00                       | 1.00                     |
| Other Christians           | 0.84 (0.63, 1.12)          | 0.84 (0.65, 1.10)        | 0.90 (0.73, 1.12)          | 0.97 (0.76, 1.23)        |
| Islam                      | 0.44 (0.09, 2.23)          | 1.01 (0.16, 6.33)        | 1.52 (0.76, 3.03)          | 1.37 (0.60, 3.11)        |
| Traditionalist             | 1.39 (0.88, 2.19)          | 1.30 (0.84, 2.01)        | 0.49 (0.29, 0.82)          | 0.64 (0.35, 1.18)        |
| Others                     | 0.30 (0.08, 1.07)          | 0.29 (0.07, 1.21)        | 0.64 (0.16, 2.52)          | 0.83 (0.24, 2.90)        |
| No Religion                | 0.85 (0.50, 1.45)          | 0.68 (0.39, 1.18)        | 0.43 (0.20, 0.90)          | 0.69 (0.35, 1.36)        |
| <b>Parity</b>              |                            |                          |                            |                          |
| 0 (Reference)              | 1.00                       | 1.00                     | 1.00                       | 1.00                     |
| 1                          | 0.85 (0.58, 1.25)          | 1.13 (0.77, 1.65)        | 2.45 (1.62, 3.69)          | 1.58 (0.89, 2.80)        |
| 2                          | 0.61 (0.41, 0.90)          | 0.86 (0.53, 1.37)        | 2.81 (1.87, 4.23)          | 1.35 (0.74, 2.47)        |
| 3                          | 0.46 (0.30, 0.71)          | 0.69 (0.39, 1.21)        | 3.24 (2.11, 4.97)          | 1.30 (0.72, 2.34)        |
| 4                          | 0.91 (0.57, 1.43)          | 1.32 (0.73, 2.40)        | 4.55 (2.97, 6.96)          | 1.69 (0.83, 3.41)        |
| 5                          | 0.70 (0.40, 1.23)          | 1.10 (0.55, 2.23)        | 3.57 (2.20, 5.80)          | 1.27 (0.60, 2.69)        |
| 6+                         | 0.70 (0.44, 1.10)          | 1.05 (0.56, 1.99)        | 2.77 (1.80, 4.26)          | 1.06 (0.53, 2.11)        |
| <b>Marital Status</b>      |                            |                          |                            |                          |
| Single (Reference)         | 1.00                       | 1.00                     | 1.00                       | 1.00                     |
| Married                    | 0.58 (0.44, 0.76)          | 0.74 (0.49, 1.10)        | 2.84 (2.10, 3.84)          | 0.99 (0.63, 1.54)        |
| Formerly Married           | 0.85 (0.56, 1.30)          | 0.99 (0.61, 1.60)        | 2.53 (1.84, 3.47)          | 0.85 (0.53, 1.37)        |
| <b>Residential Setting</b> |                            |                          |                            |                          |
| Rural (Reference)          | 1.00                       | 1.00                     | 1.00                       | 1.00                     |
| Urban                      | 1.13 (0.87, 1.47)          | 1.56 (0.90, 2.70)        | 2.81 (2.28, 3.45)          | 1.14 (0.65, 2.00)        |

| VARIABLES                          | UNDERWEIGHT                |                          | OVERWEIGHT/OBESITY         |                          |
|------------------------------------|----------------------------|--------------------------|----------------------------|--------------------------|
|                                    | Unadjusted<br>RRR (95% CI) | Adjusted<br>RRR (95% CI) | Unadjusted<br>RRR (95% CI) | Adjusted<br>RRR (95% CI) |
| <b>Region</b>                      |                            |                          |                            |                          |
| Brazzaville (Reference)            | 1.00                       | 1.00                     | 1.00                       | 1.00                     |
| Kouilou                            | 0.87 (0.59, 1.27)          | 1.03 (0.55, 1.90)        | 0.37 (0.26, 0.53)          | 1.06 (0.54, 2.06)        |
| Niari                              | 0.97 (0.63, 1.47)          | 1.01 (0.58, 1.74)        | 0.51 (0.33, 0.79)          | 0.84 (0.49, 1.45)        |
| Lekoumou                           | 0.78 (0.50, 1.23)          | 0.89 (0.43, 1.85)        | 0.24 (0.15, 0.37)          | 0.52 (0.24, 1.12)        |
| Bouenza                            | 1.20 (0.79, 1.82)          | 1.43 (0.84, 2.41)        | 0.40 (0.26, 0.63)          | 0.87 (0.49, 1.56)        |
| Pool                               | 0.85 (0.55, 1.33)          | 1.02 (0.53, 1.98)        | 0.28 (0.19, 0.41)          | 0.65 (0.32, 1.32)        |
| Plateaux                           | 1.70 (1.13, 2.56)          | 1.81 (0.87, 3.78)        | 0.28 (0.17, 0.46)          | 0.66 (0.30, 1.45)        |
| Cuvette                            | 0.79 (0.47, 1.34)          | 0.89 (0.37, 2.15)        | 0.53 (0.36, 0.79)          | 0.83 (0.41, 1.68)        |
| Cuvette - Ouest                    | 0.99 (0.53, 1.86)          | 1.46 (0.60, 3.56)        | 0.25 (0.14, 0.43)          | 0.38 (0.16, 0.92)        |
| Sangha                             | 0.49 (0.27, 0.89)          | 0.34 (0.13, 0.88)        | 0.71 (0.49, 1.02)          | 0.87 (0.46, 1.66)        |
| Likouala                           | 0.49 (0.29, 0.82)          | 0.51 (0.19, 1.33)        | 0.43 (0.30, 0.61)          | 0.75 (0.36, 1.57)        |
| Pointe-noire                       | 0.98 (0.57, 1.68)          | 0.98 (0.59, 1.63)        | 1.09 (0.80, 1.47)          | 1.22 (0.85, 1.74)        |
| <b>Level of Education</b>          |                            |                          |                            |                          |
| No Education (Reference)           | 1.00                       | 1.00                     | 1.00                       | 1.00                     |
| Primary                            | 1.17 (0.81, 1.71)          | 1.05 (0.69, 1.60)        | 1.19 (0.72, 1.97)          | 1.48 (0.83, 2.66)        |
| Secondary                          | 1.22 (0.82, 1.83)          | 1.05 (0.65, 1.69)        | 1.96 (1.22, 3.16)          | 1.60 (0.88, 2.90)        |
| Higher                             | 0.34 (0.11, 1.05)          | 0.39 (0.10, 1.46)        | 2.52 (1.36, 4.65)          | 1.27 (0.60, 2.69)        |
| <b>Wealth Quintile</b>             |                            |                          |                            |                          |
| Poorest (Reference)                | 1.00                       | 1.00                     | 1.00                       | 1.00                     |
| Poorer                             | 1.18 (0.86, 1.62)          | 0.96 (0.66, 1.38)        | 1.81 (1.28, 2.58)          | 1.21 (0.88, 1.66)        |
| Middle                             | 1.46 (0.93, 2.28)          | 1.01 (0.56, 1.81)        | 2.52 (1.84, 3.45)          | 1.30 (0.81, 2.08)        |
| Richer                             | 0.81 (0.52, 1.26)          | 0.58 (0.29, 1.19)        | 3.74 (2.75, 5.07)          | 2.08 (1.23, 3.51)        |
| Richest                            | 0.69 (0.47, 1.02)          | 0.44 (0.22, 0.86)        | 5.27 (4.06, 6.85)          | 2.77 (1.68, 4.59)        |
| <b>Occupation</b>                  |                            |                          |                            |                          |
| Not Working (Reference)            | 1.00                       | 1.00                     | 1.00                       | 1.00                     |
| Nonmanual                          | 0.73 (0.50, 1.06)          | 0.83 (0.59, 1.16)        | 2.13 (1.62, 2.79)          | 1.15 (0.83, 1.61)        |
| Manual                             | 0.71 (0.37, 1.38)          | 0.88 (0.46, 1.69)        | 1.29 (0.75, 2.22)          | 0.81 (0.45, 1.47)        |
| Agricultural                       | 0.77 (0.58, 1.01)          | 0.84 (0.54, 1.30)        | 0.53 (0.40, 0.71)          | 0.55 (0.35, 0.85)        |
| Others                             | 0.44 (0.14, 1.39)          | 0.87 (0.28, 2.72)        | 0.58 (0.14, 2.44)          | 0.29 (0.07, 1.14)        |
| <b>Media Exposure</b>              |                            |                          |                            |                          |
| Not Exposed (Reference)            | 1.00                       | 1.00                     | 1.00                       | 1.00                     |
| Exposed to one media source        | 0.83 (0.63, 1.11)          | 0.92 (0.69, 1.23)        | 1.50 (1.10, 2.03)          | 0.88 (0.62, 1.25)        |
| Exposed to two media sources       | 0.80 (0.56, 1.15)          | 0.90 (0.60, 1.34)        | 1.84 (1.36, 2.47)          | 0.85 (0.58, 1.24)        |
| Exposed to three media sources     | 0.90 (0.63, 1.27)          | 1.20 (0.78, 1.87)        | 2.83 (2.03, 3.96)          | 1.05 (0.69, 1.60)        |
| <b>Hormonal Contraceptives use</b> |                            |                          |                            |                          |
| No (Reference)                     | 1.00                       | 1.00                     | 1.00                       | 1.00                     |
| Yes                                | 1.01 (0.39, 2.65)          | 1.13 (0.42, 3.05)        | 1.86 (1.25, 2.77)          | 1.14 (0.72, 1.79)        |

Overall Model Fit:  $F(112, 248) = 6.76, P=0.0000$

**Table S49:** Unadjusted and adjusted relative risk ratio, of underweight and overweight/obesity among women of child-bearing age in Nigeria.

| VARIABLES                    | UNDERWEIGHT                |                          | OVERWEIGHT/OBESITY         |                          |
|------------------------------|----------------------------|--------------------------|----------------------------|--------------------------|
|                              | Unadjusted<br>RRR (95% CI) | Adjusted<br>RRR (95% CI) | Unadjusted<br>RRR (95% CI) | Adjusted<br>RRR (95% CI) |
| <b>Age</b>                   |                            |                          |                            |                          |
| 15-19 (Reference)            | 1.00                       | 1.00                     | 1.00                       | 1.00                     |
| 20-24                        | 0.53 (0.47, 0.59)          | 0.72 (0.64, 0.82)        | 2.15 (1.85, 2.51)          | 1.73 (1.47, 2.04)        |
| 25-29                        | 0.43 (0.38, 0.49)          | 0.66 (0.56, 0.78)        | 4.21 (3.63, 4.89)          | 2.97 (2.48, 3.55)        |
| 30-34                        | 0.36 (0.30, 0.42)          | 0.57 (0.46, 0.70)        | 6.01 (5.20, 6.94)          | 4.13 (3.42, 5.00)        |
| 35-39                        | 0.35 (0.30, 0.42)          | 0.57 (0.44, 0.72)        | 8.88 (7.65, 10.3)          | 6.58 (5.39, 8.04)        |
| 40-44                        | 0.34 (0.28, 0.41)          | 0.53 (0.41, 0.68)        | 8.72 (7.53, 10.1)          | 7.05 (5.74, 8.66)        |
| 45-49                        | 0.40 (0.34, 0.49)          | 0.58 (0.44, 0.76)        | 9.02 (7.70, 10.6)          | 8.26 (6.70, 10.2)        |
| <b>Ethnicity</b>             |                            |                          |                            |                          |
| Hausa (Reference)            | 1.00                       | 1.00                     | 1.00                       | 1.00                     |
| Ekoi                         | 0.19 (0.02, 1.70)          | 0.25 (0.02, 2.63)        | 2.03 (0.62, 6.61)          | 1.25 (0.40, 3.94)        |
| Fulani                       | 1.36 (1.12, 1.65)          | 1.33 (1.08, 1.64)        | 0.71 (0.53, 0.93)          | 0.78 (0.55, 1.11)        |
| Ibibio                       | 0.56 (0.42, 0.74)          | 0.84 (0.53, 1.31)        | 2.89 (2.31, 3.61)          | 1.65 (1.13, 2.40)        |
| Igala                        | 0.57 (0.29, 1.14)          | 0.69 (0.36, 1.34)        | 1.66 (1.27, 2.16)          | 1.20 (0.83, 1.73)        |
| Igbo                         | 0.47 (0.39, 0.56)          | 0.88 (0.59, 1.31)        | 2.45 (2.08, 2.88)          | 1.45 (1.06, 1.98)        |
| Ijaw/Izon                    | 0.56 (0.39, 0.81)          | 1.18 (0.64, 2.17)        | 2.53 (1.99, 3.20)          | 1.56 (1.11, 2.20)        |
| Kanuri/Berberi               | 0.86 (0.57, 1.30)          | 0.84 (0.54, 1.30)        | 0.90 (0.61, 1.32)          | 0.68 (0.46, 1.00)        |
| Tiv                          | 0.45 (0.29, 0.69)          | 0.88 (0.51, 1.51)        | 1.22 (0.93, 1.61)          | 1.47 (0.93, 2.33)        |
| Yoruba                       | 0.73 (0.63, 0.84)          | 0.99 (0.70, 1.40)        | 2.69 (2.34, 3.10)          | 1.11 (0.84, 1.47)        |
| Others                       | 0.55 (0.47, 0.63)          | 0.79 (0.63, 1.00)        | 1.71 (1.49, 1.97)          | 1.15 (0.92, 1.44)        |
| <b>Religion</b>              |                            |                          |                            |                          |
| Other Christians (Reference) | 1.00                       | 1.00                     | 1.00                       | 1.00                     |
| Catholics                    | 0.97 (0.78, 1.20)          | 1.11 (0.88, 1.40)        | 0.89 (0.80, 0.99)          | 0.99 (0.87, 1.12)        |
| Islam                        | 1.91 (1.71, 2.12)          | 1.33 (1.12, 1.59)        | 0.54 (0.49, 0.60)          | 1.07 (0.94, 1.23)        |
| Traditionalists              | 1.12 (0.74, 1.68)          | 1.01 (0.61, 1.67)        | 0.39 (0.24, 0.61)          | 0.74 (0.48, 1.14)        |
| <b>Parity</b>                |                            |                          |                            |                          |
| 0 (Reference)                | 1.00                       | 1.00                     | 1.00                       | 1.00                     |
| 1                            | 0.58 (0.50, 0.68)          | 0.76 (0.62, 0.93)        | 1.63 (1.42, 1.87)          | 0.93 (0.77, 1.14)        |
| 2                            | 0.55 (0.47, 0.65)          | 0.84 (0.68, 1.05)        | 2.02 (1.76, 2.33)          | 0.87 (0.70, 1.09)        |
| 3                            | 0.54 (0.45, 0.64)          | 0.87 (0.69, 1.10)        | 2.67 (2.33, 3.05)          | 0.99 (0.80, 1.23)        |
| 4                            | 0.54 (0.45, 0.65)          | 0.92 (0.73, 1.17)        | 3.05 (2.69, 3.45)          | 0.98 (0.79, 1.20)        |
| 5                            | 0.48 (0.39, 0.60)          | 0.81 (0.62, 1.05)        | 2.97 (2.57, 3.43)          | 0.99 (0.79, 1.24)        |
| 6+                           | 0.50 (0.44, 0.57)          | 0.78 (0.62, 0.98)        | 2.48 (2.21, 2.78)          | 0.91 (0.74, 1.11)        |

| VARIABLES                  | UNDERWEIGHT                |                          | OVERWEIGHT/OBESITY         |                          |
|----------------------------|----------------------------|--------------------------|----------------------------|--------------------------|
|                            | Unadjusted<br>RRR (95% CI) | Adjusted<br>RRR (95% CI) | Unadjusted<br>RRR (95% CI) | Adjusted<br>RRR (95% CI) |
| <b>Marital Status</b>      |                            |                          |                            |                          |
| Single (Reference)         | 1.00                       | 1.00                     | 1.00                       | 1.00                     |
| Married                    | 0.58 (0.52, 0.65)          | 0.54 (0.44, 0.65)        | 2.51 (2.25, 2.80)          | 1.74 (1.45, 2.09)        |
| Formerly Married           | 0.61 (0.49, 0.74)          | 0.75 (0.59, 0.96)        | 4.09 (3.53, 4.73)          | 2.02 (1.62, 2.53)        |
| <b>Residential Setting</b> |                            |                          |                            |                          |
| Rural (Reference)          | 1.00                       | 1.00                     | 1.00                       | 1.00                     |
| Urban                      | 0.90 (0.81, 1.01)          | 1.11 (0.97, 1.28)        | 2.15 (1.96, 2.36)          | 1.15 (1.02, 1.29)        |

| VARIABLES         | UNDERWEIGHT                |                          | OVERWEIGHT/OBESITY         |                          |
|-------------------|----------------------------|--------------------------|----------------------------|--------------------------|
|                   | Unadjusted<br>RRR (95% CI) | Adjusted<br>RRR (95% CI) | Unadjusted<br>RRR (95% CI) | Adjusted<br>RRR (95% CI) |
| <b>Region</b>     |                            |                          |                            |                          |
| Lagos (Reference) | 1.00                       | 1.00                     | 1.00                       | 1.00                     |
| Sokoto            | 1.82 (1.22, 2.71)          | 1.04 (0.63, 1.72)        | 0.21 (0.16, 0.27)          | 0.82 (0.56,              |
| Zamfara           | 1.38 (0.96, 1.99)          | 0.88 (0.54, 1.43)        | 0.18 (0.13, 0.24)          | 1.18)                    |
| Katsina           | 1.28 (0.87, 1.87)          | 0.84 (0.52, 1.37)        | 0.14 (0.10, 0.20)          | 0.73 (0.49,              |
| Jigawa            | 1.98 (1.36, 2.90)          | 1.21 (0.73, 2.00)        | 0.22 (0.14, 0.37)          | 1.09)                    |
| Yobe              | 1.10 (0.65, 1.86)          | 0.51 (0.26, 0.98)        | 0.34 (0.25, 0.48)          | 0.51 (0.35, 0.75)        |
| Borno             | 1.39 (0.92, 2.12)          | 0.78 (0.48, 1.27)        | 0.27 (0.19, 0.37)          | 0.97 (0.52,              |
| Adamawa           | 1.49 (0.94, 2.36)          | 1.14 (0.72, 1.80)        | 0.40 (0.28, 0.56)          | 1.81)                    |
| Gombe             | 2.44 (1.61, 3.70)          | 1.68 (1.03, 2.74)        | 0.29 (0.21, 0.38)          | 1.90 (1.24, 2.91)        |
| Bauchi            | 2.37 (1.64, 3.42)          | 1.39 (0.88, 2.18)        | 0.24 (0.17, 0.33)          | 1.02 (0.73,              |
| Kano              | 1.90 (1.35, 2.67)          | 1.08 (0.69, 1.69)        | 0.29 (0.22, 0.38)          | 1.43)                    |
| Kaduna            | 0.94 (0.61, 1.47)          | 0.80 (0.48, 1.34)        | 0.37 (0.28, 0.50)          | 1.18 (0.83,              |
| Kebbi             | 0.99 (0.66, 1.50)          | 0.59 (0.36, 0.96)        | 0.27 (0.19, 0.40)          | 1.69)                    |
| Niger             | 0.54 (0.26, 1.10)          | 0.38 (0.21, 0.70)        | 0.37 (0.28, 0.49)          | 0.92 (0.68,              |
| Fct-abuja         | 0.61 (0.36, 1.06)          | 0.58 (0.34, 0.98)        | 0.92 (0.68, 1.25)          | 1.23)                    |
| Nasarawa          | 0.42 (0.16, 1.06)          | 0.33 (0.13, 0.82)        | 0.35 (0.28, 0.45)          | 0.97 (0.69,              |
| Plateau           | 0.44 (0.27, 0.71)          | 0.39 (0.23, 0.67)        | 0.44 (0.33, 0.58)          | 1.37)                    |
| Taraba            | 0.89 (0.51, 1.53)          | 0.58 (0.33, 1.03)        | 0.40 (0.31, 0.52)          | 0.82 (0.58,              |
| Benue             | 0.71 (0.47, 1.07)          | 0.61 (0.37, 1.01)        | 0.28 (0.20, 0.39)          | 1.14)                    |
| Kogi              | 0.93 (0.58, 1.50)          | 0.82 (0.54, 1.24)        | 0.48 (0.38, 0.60)          | 0.73 (0.53,              |
| Kwara             | 1.17 (0.79, 1.74)          | 0.80 (0.53, 1.21)        | 0.59 (0.47, 0.74)          | 1.02)                    |
| Oyo               | 1.49 (0.95, 2.34)          | 1.23 (0.83, 1.81)        | 0.53 (0.42, 0.66)          | 1.10 (0.67,              |
| Osun              | 0.93 (0.63, 1.38)          | 0.77 (0.52, 1.13)        | 0.49 (0.39, 0.63)          | 1.81)                    |
| Ekiti             | 0.72 (0.46, 1.11)          | 0.62 (0.40, 0.96)        | 0.53 (0.40, 0.71)          | 1.02 (0.71,              |
| Ondo              | 0.88 (0.56, 1.38)          | 0.74 (0.47, 1.15)        | 0.56 (0.44, 0.71)          | 1.47)                    |
| Edo               | 0.87 (0.54, 1.41)          | 0.79 (0.48, 1.32)        | 0.62 (0.50, 0.76)          | 1.38 (1.04, 1.84)        |
| Anambra           | 0.33 (0.17, 0.66)          | 0.29 (0.14, 0.60)        | 0.65 (0.47, 0.92)          | 0.97 (0.74,              |
| Enugu             | 0.57 (0.35, 0.94)          | 0.43 (0.22, 0.82)        | 0.61 (0.46, 0.79)          | 1.29)                    |
| Ebonyi            | 1.16 (0.82, 1.65)          | 0.89 (0.54, 1.45)        | 0.26 (0.18, 0.40)          | 1.12 (0.85,              |
| Cross River       | 0.89 (0.57, 1.41)          | 0.97 (0.58, 1.61)        | 0.50 (0.38, 0.65)          | 1.47)                    |
| Akwa Ibom         | 0.86 (0.57, 1.30)          | 0.84 (0.50, 1.40)        | 0.58 (0.44, 0.77)          | 1.43 (1.02, 2.02)        |
| Abia              | 0.71 (0.46, 1.10)          | 0.72 (0.41, 1.27)        | 0.53 (0.38, 0.73)          | 0.88 (0.53,              |
| Imo               | 0.63 (0.40, 1.00)          | 0.57 (0.31, 1.03)        | 0.70 (0.50, 0.99)          | 1.47)                    |
| Rivers            | 0.71 (0.42, 1.19)          | 0.70 (0.40, 1.23)        | 0.80 (0.61, 1.07)          | 0.95 (0.71,              |
| Bayelsa           | 0.61 (0.40, 0.93)          | 0.42 (0.21, 0.81)        | 0.55 (0.45, 0.68)          | 1.26)                    |
| Delta             | 0.72 (0.49, 1.06)          | 0.59 (0.39, 0.90)        | 0.46 (0.36, 0.58)          | 0.90 (0.70,              |
| Ogun              | 1.35 (0.89, 2.04)          | 1.41 (0.93, 2.13)        | 0.71 (0.54, 0.94)          | 1.14)                    |
|                   |                            |                          |                            | 0.70 (0.54, 0.93)        |
|                   |                            |                          |                            | 0.63 (0.49, 0.80)        |
|                   |                            |                          |                            | 0.72 (0.51,              |
|                   |                            |                          |                            | 1.01)                    |
|                   |                            |                          |                            | 0.88 (0.69,              |
|                   |                            |                          |                            | 1.12)                    |
|                   |                            |                          |                            | 1.09 (0.81,              |
|                   |                            |                          |                            | 1.46)                    |
|                   |                            |                          |                            | 0.78 (0.49,              |
|                   |                            |                          |                            | 1.24)                    |
|                   |                            |                          |                            | 1.11 (0.80,              |
|                   |                            |                          |                            | 1.53)                    |
|                   |                            |                          |                            | 0.51 (0.34, 0.78)        |
|                   |                            |                          |                            | 0.97 (0.69,              |
|                   |                            |                          |                            | 1.37)                    |
|                   |                            |                          |                            | 0.96 (0.66,              |
|                   |                            |                          |                            | 1.40)                    |
|                   |                            |                          |                            | 0.64 (0.44, 0.92)        |
|                   |                            |                          |                            | 0.93 (0.61,              |
|                   |                            |                          |                            | 1.41)                    |
|                   |                            |                          |                            | 1.24 (0.91,              |
|                   |                            |                          |                            | 1.68)                    |



| VARIABLES                         | UNDERWEIGHT                |                          | OVERWEIGHT/OBESITY         |                                        |
|-----------------------------------|----------------------------|--------------------------|----------------------------|----------------------------------------|
|                                   | Unadjusted<br>RRR (95% CI) | Adjusted<br>RRR (95% CI) | Unadjusted<br>RRR (95% CI) | Adjusted<br>RRR (95% CI)               |
| <b>Level of Education</b>         |                            |                          |                            |                                        |
| No Education                      | 1.00                       | 1.00                     | 1.00                       | 1.00                                   |
| Primary                           | 0.82 (0.72, 0.93)          | 1.09 (0.94, 1.28)        | 2.13 (1.89, 2.40)          | 1.29 (1.14, 1.46)                      |
| Secondary                         | 0.81 (0.72, 0.91)          | 0.80 (0.67, 0.96)        | 1.78 (1.59, 1.99)          | 1.39 (1.22, 1.58)                      |
| Higher                            | 0.39 (0.31, 0.50)          | 0.61 (0.46, 0.82)        | 4.07 (3.55, 4.65)          | 1.68 (1.43, 1.97)                      |
| <b>Wealth Quintile</b>            |                            |                          |                            |                                        |
| Poorest (Reference)               | 1.00                       | 1.00                     | 1.00                       | 1.00                                   |
| Poorer                            | 0.80 (0.69, 0.92)          | 0.91 (0.78, 1.06)        | 1.43 (1.20, 1.70)          | 1.45 (1.22, 1.72)                      |
| Middle                            | 0.72 (0.61, 0.84)          | 0.96 (0.80, 1.14)        | 2.22 (1.87, 2.63)          | 1.97 (1.65, 2.36)                      |
| Richer                            | 0.67 (0.58, 0.78)          | 0.90 (0.74, 1.10)        | 3.49 (2.95, 4.14)          | 2.70 (2.23, 3.28)                      |
| Richest                           | 0.49 (0.41, 0.59)          | 0.69 (0.54, 0.87)        | 5.58 (4.70, 6.62)          | 3.74 (3.04, 4.61)                      |
| <b>Occupation</b>                 |                            |                          |                            |                                        |
| Not Working (Reference)           | 1.00                       | 1.00                     | 1.00                       | 1.00                                   |
| Nonmanual                         | 0.52 (0.46, 0.57)          | 0.76 (0.68, 0.85)        | 2.91 (2.65, 3.19)          | 1.27 (1.14, 1.41)                      |
| Manual                            | 0.83 (0.70, 0.97)          | 0.94 (0.80, 1.11)        | 1.74 (1.52, 1.98)          | 1.08 (0.94, 1.24)                      |
| Agricultural                      | 0.43 (0.36, 0.51)          | 0.85 (0.69, 1.04)        | 1.42 (1.22, 1.65)          | 1.24                                   |
| Others                            | 1.69 (0.82, 3.50)          | 1.49 (0.78, 2.83)        | 1.16 (0.38, 3.61)          | 0.75 (0.63, 0.89)<br>1.11 (0.45, 2.75) |
| <b>Media Exposure</b>             |                            |                          |                            |                                        |
| Not Exposed (Reference)           | 1.00                       | 1.00                     | 1.00                       | 1.00                                   |
| Exposed to one media source       | 0.83 (0.74, 0.94)          | 0.87 (0.76, 0.99)        | 1.40 (1.25, 1.58)          | 1.19 (1.05, 1.34)                      |
| Exposed to two media sources      | 0.61 (0.53, 0.69)          | 0.67 (0.57, 0.79)        | 2.25 (2.01, 2.51)          | 1.15 (1.02, 1.30)                      |
| Exposed to three media sources    | 0.60 (0.51, 0.70)          | 0.65 (0.53, 0.79)        | 2.96 (2.61, 3.35)          | 1.34 (1.17, 1.54)                      |
| <b>Hormonal Contraceptive Use</b> |                            |                          |                            |                                        |
| No (Reference)                    | 1.00                       | 1.00                     | 1.00                       | 1.00                                   |
| Yes                               | 0.26 (0.19, 0.36)          | 0.53 (0.38, 0.74)        | 2.06 (1.81, 2.34)          | 1.06 (0.93, 1.22)                      |

Overall Model Fit:  $F(158, 666) = 26.99, P=0.0000$ .

**Table S50:** Unadjusted and adjusted relative risk ratio, of underweight and overweight/obesity among women of child-bearing age in Zambia.

| VARIABLES | UNDERWEIGHT                |                          | OVERWEIGHT/OBESITY         |                          |
|-----------|----------------------------|--------------------------|----------------------------|--------------------------|
|           | Unadjusted<br>RRR (95% CI) | Adjusted<br>RRR (95% CI) | Unadjusted<br>RRR (95% CI) | Adjusted<br>RRR (95% CI) |

|                            | UNDERWEIGHT       |                   | OVERWEIGHT/OBESITY |                   |
|----------------------------|-------------------|-------------------|--------------------|-------------------|
| <b>Age</b>                 |                   |                   |                    |                   |
| 15-19 (Reference)          | 1.00              | 1.00              | 1.00               | 1.00              |
| 20-24                      | 0.58 (0.47, 0.72) | 0.76 (0.60, 0.97) | 1.97 (1.57, 2.48)  | 1.51 (1.17, 1.94) |
| 25-29                      | 0.51 (0.41, 0.63) | 0.74 (0.55, 1.00) | 3.00 (2.44, 3.68)  | 1.93 (1.48, 2.51) |
| 30-34                      | 0.53 (0.42, 0.67) | 0.82 (0.58, 1.15) | 4.04 (3.34, 4.90)  | 2.55 (1.90, 3.41) |
| 35-39                      | 0.72 (0.58, 0.89) | 1.11 (0.80, 1.54) | 4.53 (3.66, 5.61)  | 2.88 (2.08, 3.99) |
| 40-44                      | 0.69 (0.53, 0.90) | 1.07 (0.72, 1.59) | 5.50 (4.48, 6.75)  | 4.06 (2.97, 5.55) |
| 45-49                      | 0.83 (0.63, 1.09) | 1.26 (0.84, 1.89) | 6.19 (4.90, 7.82)  | 4.82 (3.42, 6.79) |
| <b>Ethnicity</b>           |                   |                   |                    |                   |
| Bemba (Reference)          | 1.00              | 1.00              |                    | 1.00              |
| Tonga                      | 0.70 (0.55, 0.90) | 0.62 (0.42, 0.91) | 0.96 (0.78, 1.17)  | 1.01 (0.79, 1.28) |
| Chewa                      | 0.76 (0.56, 1.03) | 0.89 (0.59, 1.36) | 1.21 (0.97, 1.51)  | 1.30 (0.97, 1.74) |
| Lozi                       | 1.28 (0.95, 1.73) | 0.84 (0.60, 1.19) | 0.92 (0.73, 1.17)  | 1.14 (0.85, 1.52) |
| Nsenga                     | 0.69 (0.47, 1.01) | 0.79 (0.51, 1.21) | 1.29 (1.03, 1.62)  | 1.21 (0.89, 1.66) |
| Tumbuka                    | 0.69 (0.47, 1.02) | 0.78 (0.51, 1.18) | 1.16 (0.86, 1.55)  | 1.18 (0.86, 1.62) |
| Ngoni                      | 0.73 (0.49, 1.10) | 0.92 (0.58, 1.46) | 1.59 (1.23, 2.07)  | 1.27 (0.94, 1.71) |
| Lala                       | 0.74 (0.49, 1.13) | 0.63 (0.39, 1.02) | 0.89 (0.64, 1.25)  | 1.08 (0.77, 1.52) |
| Kaonde                     | 0.61 (0.37, 0.99) | 0.67 (0.39, 1.15) | 1.15 (0.80, 1.64)  | 1.22 (0.84, 1.77) |
| Namwanga                   | 1.08 (0.76, 1.54) | 1.03 (0.72, 1.48) | 0.99 (0.71, 1.38)  | 0.89 (0.60, 1.33) |
| Mambwe                     | 0.77 (0.50, 1.17) | 0.79 (0.51, 1.21) | 0.97 (0.71, 1.32)  | 0.90 (0.66, 1.22) |
| Lunda(North-Western)       | 1.06 (0.75, 1.48) | 1.29 (0.80, 2.06) | 0.98 (0.66, 1.46)  | 1.47 (0.90, 2.41) |
| Luvale                     | 0.91 (0.58, 1.42) | 0.79 (0.49, 1.29) | 1.00 (0.66, 1.52)  | 1.28 (0.82, 1.99) |
| Others                     | 1.02 (0.85, 1.24) | 0.85 (0.70, 1.05) | 1.05 (0.88, 1.25)  | 1.18 (0.99, 1.42) |
| <b>Religion</b>            |                   |                   |                    |                   |
| Catholics (Reference)      | 1.00              | 1.00              | 1.00               | 1.00              |
| Other Christians           | 1.00 (0.84, 1.20) | 1.02 (0.84, 1.23) | 1.01 (0.87, 1.17)  | 0.97 (0.82, 1.15) |
| Islam                      | 1.62 (0.76, 3.48) | 1.81 (0.84, 3.89) | 3.26 (1.70, 6.24)  | 1.46 (0.80, 2.65) |
| Others                     | 0.91 (0.43, 1.94) | 0.76 (0.34, 1.71) | 0.63 (0.32, 1.23)  | 0.74 (0.37, 1.47) |
| <b>Parity</b>              |                   |                   |                    |                   |
| 0 (Reference)              | 1.00              | 1.00              | 1.00               | 1.00              |
| 1                          | 0.64 (0.51, 0.79) | 0.89 (0.70, 1.14) | 1.46 (1.19, 1.80)  | 1.02 (0.79, 1.32) |
| 2                          | 0.61 (0.48, 0.76) | 1.03 (0.75, 1.42) | 2.22 (1.85, 2.66)  | 1.19 (0.90, 1.57) |
| 3                          | 0.56 (0.44, 0.71) | 0.93 (0.65, 1.32) | 2.78 (2.33, 3.33)  | 1.41 (1.03, 1.93) |
| 4                          | 0.76 (0.59, 0.98) | 1.17 (0.79, 1.73) | 2.69 (2.16, 3.34)  | 1.41 (1.03, 1.92) |
| 5                          | 0.50 (0.37, 0.67) | 0.70 (0.46, 1.07) | 2.65 (2.13, 3.28)  | 1.46 (1.03, 2.07) |
| 6+                         | 0.72 (0.60, 0.85) | 0.83 (0.57, 1.21) | 2.54 (2.14, 3.00)  | 1.50 (1.08, 2.08) |
| <b>Marital Status</b>      |                   |                   |                    |                   |
| Single (Reference)         | 1.00              | 1.00              | 1.00               | 1.00              |
| Married                    | 0.62 (0.54, 0.71) | 0.61 (0.47, 0.80) | 2.37 (2.04, 2.77)  | 1.36 (1.04, 1.77) |
| Formerly Married           | 0.64 (0.52, 0.80) | 0.57 (0.41, 0.81) | 2.32 (1.93, 2.78)  | 1.19 (0.90, 1.59) |
| <b>Residential Setting</b> |                   |                   |                    |                   |
| Rural (Reference)          | 1.00              | 1.00              | 1.00               | 1.00              |
| Urban                      | 0.87 (0.75, 1.01) | 1.22 (0.99, 1.49) | 2.69 (2.39, 3.03)  | 1.12 (0.96, 1.30) |
| <b>Region</b>              |                   |                   |                    |                   |
| Lusaka (Reference)         | 1.00              | 1.00              | 1.00               | 1.00              |
| Central                    | 1.00 (0.75, 1.33) | 0.88 (0.63, 1.21) | 0.43 (0.35, 0.52)  | 0.75 (0.61, 0.92) |
| Copperbelt                 | 1.03 (0.78, 1.38) | 0.92 (0.68, 1.25) | 0.81 (0.68, 0.96)  | 0.88 (0.73, 1.07) |
| Eastern                    | 0.73 (0.55, 0.97) | 0.51 (0.36, 0.74) | 0.44 (0.37, 0.53)  | 0.90 (0.71, 1.14) |
| Luapula                    | 0.98 (0.74, 1.29) | 0.63 (0.45, 0.87) | 0.27 (0.21, 0.35)  | 0.62 (0.47, 0.83) |
| Muchinga                   | 1.33 (0.98, 1.79) | 0.84 (0.61, 1.17) | 0.29 (0.24, 0.37)  | 0.69 (0.53, 0.89) |
| Northern                   | 1.25 (0.95, 1.65) | 0.75 (0.54, 1.03) | 0.27 (0.21, 0.35)  | 0.67 (0.51, 0.89) |
| North Western              | 0.85 (0.61, 1.17) | 0.55 (0.36, 0.84) | 0.32 (0.25, 0.42)  | 0.59 (0.41, 0.84) |
| Southern                   | 0.94 (0.70, 1.25) | 1.01 (0.68, 1.50) | 0.52 (0.41, 0.64)  | 0.91 (0.72, 1.15) |
| Western                    | 1.98 (1.47, 2.66) | 1.31 (0.91, 1.89) | 0.24 (0.18, 0.31)  | 0.51 (0.37, 0.69) |

|                                   | UNDERWEIGHT       |                   | OVERWEIGHT/OBESITY |                   |
|-----------------------------------|-------------------|-------------------|--------------------|-------------------|
| <b>Level of Education</b>         |                   |                   |                    |                   |
| No Education (Reference)          | 1.00              | 1.00              | 1.00               | 1.00              |
| Primary                           | 0.99 (0.78, 1.24) | 0.94 (0.75, 1.18) | 1.06 (0.86, 1.31)  | 1.00 (0.80, 1.26) |
| Secondary                         | 0.76 (0.59, 0.97) | 0.66 (0.50, 0.86) | 1.38 (1.12, 1.70)  | 1.23 (0.95, 1.58) |
| Higher                            | 0.64 (0.41, 0.99) | 0.76 (0.47, 1.24) | 3.66 (2.74, 4.88)  | 1.67 (1.19, 2.36) |
| <b>Wealth Quintile</b>            |                   |                   |                    |                   |
| Poorest (Reference)               | 1.00              | 1.00              | 1.00               | 1.00              |
| Poorer                            | 0.82 (0.68, 0.99) | 0.83 (0.69, 1.01) | 1.43 (1.17, 1.74)  | 1.34 (1.09, 1.65) |
| Middle                            | 0.65 (0.53, 0.79) | 0.62 (0.49, 0.79) | 2.15 (1.76, 2.62)  | 1.84 (1.48, 2.28) |
| Richer                            | 0.56 (0.45, 0.70) | 0.44 (0.33, 0.59) | 4.16 (3.45, 5.03)  | 3.23 (2.49, 4.20) |
| Richest                           | 0.67 (0.53, 0.84) | 0.47 (0.33, 0.67) | 5.84 (4.83, 7.05)  | 4.53 (3.42, 6.00) |
| <b>Occupation</b>                 |                   |                   |                    |                   |
| Not Working (Reference)           | 1.00              | 1.00              | 1.00               | 1.00              |
| Nonmanual                         | 0.66 (0.55, 0.80) | 0.79 (0.64, 0.96) | 2.16 (1.91, 2.44)  | 1.15 (0.99, 1.32) |
| Manual                            | 0.74 (0.36, 1.50) | 0.86 (0.42, 1.78) | 3.01 (1.95, 4.65)  | 1.47 (0.90, 2.41) |
| Agricultural                      | 1.00 (0.87, 1.15) | 0.98 (0.84, 1.15) | 0.65 (0.57, 0.75)  | 0.86 (0.74, 1.00) |
| Others                            | 0.59 (0.28, 1.26) | 0.63 (0.29, 1.35) | 3.17 (2.17, 4.64)  | 1.88 (1.26, 2.80) |
| <b>Media Exposure</b>             |                   |                   |                    |                   |
| Not Exposed (Reference)           | 1.00              | 1.00              | 1.00               | 1.00              |
| Exposed to one media source       | 1.00 (0.84, 1.18) | 1.10 (0.92, 1.32) | 1.30 (1.12, 1.52)  | 0.99 (0.84, 1.16) |
| Exposed to two media sources      | 0.97 (0.80, 1.16) | 1.23 (1.00, 1.53) | 2.08 (1.77, 2.45)  | 1.03 (0.86, 1.24) |
| Exposed to three media sources    | 0.71 (0.57, 0.89) | 0.94 (0.71, 1.25) | 2.77 (2.37, 3.23)  | 1.01 (0.83, 1.24) |
| <b>Hormonal Contraceptive Use</b> |                   |                   |                    |                   |
| No (Reference)                    | 1.00              | 1.00              | 1.00               | 1.00              |
| Yes                               | 0.61 (0.51, 0.72) | 0.80 (0.66, 0.97) | 1.54 (1.39, 1.70)  | 1.27 (1.12, 1.44) |

Overall Model Fit:  $F(110, 592) = 16.04, P=0.0000$ .

**Table S51:** Unadjusted and adjusted relative risk ratio, of underweight and overweight/obesity among women of child-bearing age in Sierra Leone.

| VARIABLES         | UNDERWEIGHT             |                       | OVERWEIGHT/OBESITY      |                       |
|-------------------|-------------------------|-----------------------|-------------------------|-----------------------|
|                   | Unadjusted RRR (95% CI) | Adjusted RRR (95% CI) | Unadjusted RRR (95% CI) | Adjusted RRR (95% CI) |
| <b>Age</b>        |                         |                       |                         |                       |
| 15-19 (Reference) | 1.00                    | 1.00                  | 1.00                    | 1.00                  |
| 20-24             | 0.51 (0.36, 0.72)       | 0.67 (0.46, 0.98)     | 1.74 (1.28, 2.38)       | 1.73 (1.17, 2.54)     |
| 25-29             | 0.37 (0.27, 0.52)       | 0.48 (0.30, 0.77)     | 2.42 (1.77, 3.30)       | 2.59 (1.71, 3.91)     |
| 30-34             | 0.58 (0.40, 0.83)       | 0.73 (0.43, 1.23)     | 3.41 (2.45, 4.74)       | 3.77 (2.40, 5.92)     |
| 35-39             | 0.55 (0.40, 0.76)       | 0.67 (0.40, 1.12)     | 3.60 (2.72, 4.76)       | 4.03 (2.66, 6.10)     |
| 40-44             | 0.63 (0.41, 0.98)       | 0.74 (0.39, 1.40)     | 4.92 (3.52, 6.89)       | 5.25 (3.28, 8.39)     |
| 45-49             | 0.40 (0.26, 0.61)       | 0.46 (0.25, 0.85)     | 4.62 (3.39, 6.30)       | 5.32 (3.30, 8.56)     |

|                              | UNDERWEIGHT       |                   | OVERWEIGHT/OBESITY |                   |
|------------------------------|-------------------|-------------------|--------------------|-------------------|
| <b>Ethnicity</b>             |                   |                   |                    |                   |
| Temne (Reference)            | 1.00              | 1.00              | 1.00               | 1.00              |
| Creole                       | 1.27 (0.41, 3.91) | 1.27 (0.38, 4.28) | 3.11 (1.57, 6.16)  | 1.95 (1.05, 3.64) |
| Fullah                       | 1.29 (0.82, 2.04) | 1.47 (0.87, 2.47) | 2.25 (1.43, 3.53)  | 1.38 (0.85, 2.23) |
| Kono                         | 1.22 (0.82, 1.82) | 1.04 (0.61, 1.77) | 0.88 (0.60, 1.30)  | 0.89 (0.53, 1.51) |
| Limba                        | 0.76 (0.47, 1.24) | 0.69 (0.41, 1.16) | 1.11 (0.77, 1.61)  | 1.04 (0.66, 1.62) |
| Loko                         | 0.83 (0.33, 2.11) | 0.78 (0.30, 2.03) | 1.70 (0.78, 3.69)  | 1.42 (0.80, 2.50) |
| Mandigo                      | 0.91 (0.46, 1.79) | 0.94 (0.46, 1.93) | 1.47 (0.90, 2.38)  | 0.92 (0.56, 1.52) |
| Mende                        | 0.98 (0.74, 1.29) | 0.97 (0.64, 1.49) | 1.26 (1.01, 1.58)  | 1.11 (0.84, 1.47) |
| Sherbro                      | 0.70 (0.33, 1.49) | 0.68 (0.32, 1.44) | 1.40 (0.89, 2.21)  | 1.19 (0.74, 1.92) |
| Koranko                      | 0.93 (0.50, 1.74) | 0.85 (0.44, 1.66) | 0.61 (0.35, 1.07)  | 1.01 (0.62, 1.67) |
| Others                       | 1.50 (0.97, 2.33) | 1.46 (0.89, 2.37) | 0.97 (0.64, 1.47)  | 1.04 (0.69, 1.57) |
| <b>Religion</b>              |                   |                   |                    |                   |
| Other Christians (Reference) | 1.00              | 1.00              | 1.00               | 1.00              |
| Islam                        | 0.95 (0.76, 1.18) | 0.89 (0.71, 1.12) | 0.77 (0.63, 0.94)  | 0.95 (0.77, 1.19) |
| Other                        | 0.46 (0.10, 2.27) | 0.35 (0.07, 1.76) | 0.36 (0.10, 1.28)  | 0.65 (0.18, 2.39) |
| <b>Parity</b>                |                   |                   |                    |                   |
| 0 (Reference)                | 1.00              | 1.00              | 1.00               | 1.00              |
| 1                            | 0.43 (0.30, 0.61) | 0.62 (0.42, 0.92) | 1.52 (1.17, 1.97)  | 1.09 (0.76, 1.55) |
| 2                            | 0.51 (0.36, 0.72) | 0.90 (0.56, 1.44) | 1.87 (1.39, 2.51)  | 1.05 (0.71, 1.54) |
| 3                            | 0.52 (0.36, 0.75) | 0.94 (0.56, 1.57) | 2.10 (1.62, 2.71)  | 1.18 (0.80, 1.74) |
| 4                            | 0.57 (0.39, 0.82) | 1.03 (0.62, 1.70) | 2.38 (1.82, 3.10)  | 1.19 (0.81, 1.75) |
| 5                            | 0.53 (0.34, 0.82) | 0.91 (0.52, 1.57) | 2.44 (1.80, 3.30)  | 1.17 (0.80, 1.73) |
| 6+                           | 0.61 (0.45, 0.82) | 1.00 (0.58, 1.72) | 2.35 (1.84, 3.01)  | 1.17 (0.78, 1.76) |
| <b>Marital Status</b>        |                   |                   |                    |                   |
| Single (Reference)           | 1.00              | 1.00              | 1.00               | 1.00              |
| Married                      | 0.60 (0.47, 0.76) | 0.82 (0.53, 1.26) | 1.79 (1.46, 2.19)  | 1.46 (1.11, 1.92) |
| Formerly Married             | 0.62 (0.40, 0.97) | 0.94 (0.54, 1.62) | 3.19 (2.42, 4.19)  | 1.97 (1.36, 2.86) |
| <b>Residential Setting</b>   |                   |                   |                    |                   |
| Rural (Reference)            | 1.00              | 1.00              | 1.00               | 1.00              |
| Urban                        | 0.85 (0.64, 1.12) | 0.96 (0.62, 1.48) | 2.33 (1.91, 2.83)  | 1.30 (0.97, 1.76) |
| <b>Region</b>                |                   |                   |                    |                   |
| Western (Reference)          | 1.00              | 1.00              | 1.00               | 1.00              |
| Eastern                      | 1.32 (0.81, 2.15) | 1.10 (0.67, 1.81) | 0.64 (0.47, 0.87)  | 1.27 (0.89, 1.83) |
| Northern                     | 1.29 (0.84, 1.96) | 1.14 (0.70, 1.85) | 0.44 (0.33, 0.58)  | 1.06 (0.75, 1.49) |
| Southern                     | 1.24 (0.80, 1.92) | 1.05 (0.63, 1.77) | 0.66 (0.50, 0.88)  | 1.46 (1.04, 2.06) |
| <b>Level of Education</b>    |                   |                   |                    |                   |
| No Education (Reference)     | 1.00              | 1.00              | 1.00               | 1.00              |
| Primary                      | 1.27 (0.98, 1.65) | 1.02 (0.75, 1.40) | 0.91 (0.71, 1.15)  | 1.05 (0.78, 1.39) |
| Secondary                    | 1.28 (0.99, 1.65) | 0.91 (0.62, 1.32) | 1.07 (0.85, 1.34)  | 1.11 (0.84, 1.47) |
| Higher                       | 0.73 (0.38, 1.42) | 1.09 (0.42, 2.80) | 1.59 (1.05, 2.40)  | 0.57 (0.32, 1.03) |
| <b>Wealth Quintile</b>       |                   |                   |                    |                   |
| Poorest (Reference)          | 1.00              | 1.00              | 1.00               | 1.00              |
| Poorer                       | 0.99 (0.71, 1.37) | 0.97 (0.70, 1.34) | 1.37 (1.00, 1.87)  | 1.42 (1.03, 1.95) |
| Middle                       | 0.89 (0.65, 1.24) | 0.88 (0.64, 1.23) | 1.52 (1.11, 2.07)  | 1.54 (1.10, 2.16) |
| Richer                       | 0.94 (0.67, 1.32) | 0.94 (0.65, 1.36) | 2.29 (1.73, 3.03)  | 1.99 (1.43, 2.77) |
| Richest                      | 0.75 (0.51, 1.11) | 0.71 (0.39, 1.29) | 3.66 (2.78, 4.83)  | 2.89 (1.89, 4.40) |
| <b>Occupation</b>            |                   |                   |                    |                   |
| Not Working (Reference)      | 1.00              | 1.00              | 1.00               | 1.00              |
| Nonmanual                    | 0.25 (0.12, 0.52) | 0.34 (0.15, 0.76) | 1.81 (1.30, 2.52)  | 0.92 (0.64, 1.31) |
| Manual                       | 0.44 (0.31, 0.60) | 0.54 (0.38, 0.76) | 1.33 (1.08, 1.63)  | 0.84 (0.67, 1.05) |
| Agricultural                 | 0.72 (0.56, 0.93) | 0.80 (0.60, 1.07) | 0.61 (0.48, 0.77)  | 0.57 (0.44, 0.74) |

|                                   | UNDERWEIGHT       |                   | OVERWEIGHT/OBESITY |                   |
|-----------------------------------|-------------------|-------------------|--------------------|-------------------|
| <b>Media Exposure</b>             |                   |                   |                    |                   |
| Not Exposed (Reference)           | 1.00              | 1.00              | 1.00               | 1.00              |
| Exposed to one media source       | 1.14 (0.92, 1.43) | 1.14 (0.90, 1.44) | 1.32 (1.06, 1.64)  | 1.17 (0.94, 1.46) |
| Exposed to two media sources      | 1.00 (0.72, 1.39) | 1.03 (0.72, 1.48) | 2.06 (1.61, 2.64)  | 1.39 (1.04, 1.86) |
| Exposed to three media sources    | 1.04 (0.68, 1.58) | 1.07 (0.69, 1.64) | 2.60 (1.97, 3.45)  | 1.94 (1.39, 2.71) |
| <b>Hormonal Contraceptive Use</b> |                   |                   |                    |                   |
| No (Reference)                    | 1.00              | 1.00              | 1.00               | 1.00              |
| Yes                               | 0.82 (0.64, 1.06) | 0.87 (0.66, 1.14) | 1.14 (0.93, 1.40)  | 0.96 (0.76, 1.21) |

Overall Model Fit:  $F(88, 320) = 7.57, P=0.0000$ .

**Table S52:** Unadjusted and adjusted relative risk ratio, of underweight and overweight/obesity among women of child-bearing age in Mozambique.

| VARIABLES                  | UNDERWEIGHT                |                          | OVERWEIGHT/OBESITY         |                          |
|----------------------------|----------------------------|--------------------------|----------------------------|--------------------------|
|                            | Unadjusted<br>RRR (95% CI) | Adjusted<br>RRR (95% CI) | Unadjusted<br>RRR (95% CI) | Adjusted<br>RRR (95% CI) |
| <b>Age</b>                 |                            |                          |                            |                          |
| 15-19 (Reference)          | 1.00                       | 1.00                     | 1.00                       | 1.00                     |
| 20-24                      | 0.43 (0.34, 0.54)          | 0.63 (0.46, 0.86)        | 1.52 (1.20, 1.93)          | 1.46 (1.10, 1.94)        |
| 25-29                      | 0.47 (0.34, 0.64)          | 0.71 (0.47, 1.06)        | 2.67 (2.15, 3.31)          | 2.67 (2.00, 3.58)        |
| 30-34                      | 0.43 (0.32, 0.58)          | 0.65 (0.43, 0.99)        | 3.34 (2.66, 4.20)          | 3.87 (2.80, 5.33)        |
| 35-39                      | 0.48 (0.34, 0.66)          | 0.69 (0.43, 1.11)        | 3.49 (2.84, 4.29)          | 4.71 (3.46, 6.41)        |
| 40-44                      | 0.63 (0.45, 0.88)          | 0.90 (0.60, 1.36)        | 4.23 (3.30, 5.42)          | 6.53 (4.52, 9.43)        |
| 45-49                      | 0.84 (0.61, 1.17)          | 1.20 (0.77, 1.87)        | 4.78 (3.82, 6.00)          | 8.84 (6.10, 12.8)        |
| <b>Ethnicity</b>           |                            |                          |                            |                          |
| Xichangana (Reference)     | 1.00                       | 1.00                     | 1.00                       | 1.00                     |
| Emakhuwa                   | 1.21 (0.88, 1.68)          | 1.08 (0.63, 1.85)        | 0.31 (0.23, 0.40)          | 0.67 (0.45, 0.99)        |
| Português                  | 1.63 (1.18, 2.25)          | 1.34 (0.90, 2.00)        | 0.92 (0.75, 1.14)          | 0.88 (0.72, 1.08)        |
| Cisena                     | 1.99 (1.45, 2.72)          | 1.14 (0.70, 1.86)        | 0.13 (0.09, 0.19)          | 0.43 (0.29, 0.63)        |
| Elomwe                     | 2.81 (1.91, 4.11)          | 1.17 (0.68, 2.01)        | 0.11 (0.07, 0.18)          | 0.54 (0.29, 1.03)        |
| Echuwabo                   | 1.58 (0.95, 2.64)          | 0.79 (0.44, 1.43)        | 0.25 (0.16, 0.40)          | 0.77 (0.46, 1.29)        |
| Cinyanja                   | 1.39 (0.96, 2.03)          | 0.88 (0.52, 1.50)        | 0.21 (0.15, 0.30)          | 0.65 (0.41, 1.02)        |
| Cindau                     | 1.40 (0.99, 1.98)          | 0.93 (0.54, 1.58)        | 0.34 (0.26, 0.45)          | 0.88 (0.59, 1.31)        |
| Xitswa                     | 0.86 (0.54, 1.34)          | 1.01 (0.54, 1.89)        | 0.72 (0.54, 0.96)          | 0.84 (0.60, 1.17)        |
| Cinyungwe                  | 2.02 (1.33, 3.08)          | 1.35 (0.72, 2.53)        | 0.26 (0.15, 0.42)          | 0.50 (0.30, 0.85)        |
| Ciyao                      | 1.66 (0.93, 2.95)          | 1.10 (0.48, 2.55)        | 0.22 (0.14, 0.35)          | 0.59 (0.30, 1.14)        |
| Others                     | 1.36 (1.00, 1.84)          | 1.14 (0.75, 1.72)        | 0.63 (0.52, 0.76)          | 0.93 (0.76, 1.15)        |
| <b>Religion</b>            |                            |                          |                            |                          |
| Catholics (Reference)      | 1.00                       | 1.00                     | 1.00                       | 1.00                     |
| Other Christians           | 0.92 (0.73, 1.16)          | 1.00 (0.76, 1.31)        | 1.16 (0.98, 1.38)          | 0.95 (0.80, 1.13)        |
| Islam                      | 0.88 (0.65, 1.18)          | 1.00 (0.70, 1.43)        | 0.67 (0.54, 0.83)          | 0.77 (0.59, 1.01)        |
| Others                     | 1.17 (0.64, 2.14)          | 1.33 (0.69, 2.56)        | 1.43 (1.04, 1.95)          | 0.83 (0.60, 1.14)        |
| No Religion                | 1.04 (0.78, 1.40)          | 1.02 (0.74, 1.41)        | 0.73 (0.56, 0.96)          | 0.93 (0.70, 1.24)        |
| <b>Parity</b>              |                            |                          |                            |                          |
| 0 (Reference)              | 1.00                       | 1.00                     | 1.00                       | 1.00                     |
| 1                          | 0.51 (0.39, 0.68)          | 0.81 (0.59, 1.13)        | 1.11 (0.89, 1.39)          | 0.75 (0.57, 0.99)        |
| 2                          | 0.49 (0.37, 0.65)          | 0.86 (0.58, 1.28)        | 1.64 (1.35, 1.99)          | 0.94 (0.71, 1.23)        |
| 3                          | 0.47 (0.34, 0.65)          | 0.80 (0.52, 1.23)        | 2.10 (1.70, 2.60)          | 1.03 (0.76, 1.40)        |
| 4                          | 0.48 (0.35, 0.66)          | 0.79 (0.53, 1.18)        | 1.81 (1.47, 2.23)          | 0.88 (0.64, 1.21)        |
| 5                          | 0.59 (0.41, 0.84)          | 0.85 (0.53, 1.37)        | 1.91 (1.53, 2.37)          | 0.87 (0.63, 1.19)        |
| 6+                         | 0.59 (0.45, 0.78)          | 0.71 (0.48, 1.06)        | 1.46 (1.22, 1.75)          | 0.76 (0.57, 1.02)        |
| <b>Marital Status</b>      |                            |                          |                            |                          |
| Single (Reference)         | 1.00                       | 1.00                     | 1.00                       | 1.00                     |
| Married                    | 0.51 (0.42, 0.62)          | 0.57 (0.44, 0.75)        | 1.44 (1.24, 1.68)          | 1.33 (1.05, 1.67)        |
| Formerly Married           | 0.50 (0.38, 0.65)          | 0.55 (0.40, 0.76)        | 1.51 (1.24, 1.83)          | 0.97 (0.72, 1.31)        |
| <b>Residential Setting</b> |                            |                          |                            |                          |
| Rural (Reference)          | 1.00                       | 1.00                     | 1.00                       | 1.00                     |
| Urban                      | 0.77 (0.63, 0.93)          | 0.99 (0.77, 1.28)        | 3.02 (2.56, 3.56)          | 0.99 (0.79, 1.24)        |

|                                   | UNDERWEIGHT       |                   | OVERWEIGHT/OBESITY |                   |
|-----------------------------------|-------------------|-------------------|--------------------|-------------------|
| <b>Region</b>                     |                   |                   |                    |                   |
| Maputo Provincia (Reference)      | 1.00              | 1.00              | 1.00               | 1.00              |
| Niassa                            | 1.39 (0.90, 2.14) | 1.49 (0.79, 2.80) | 0.26 (0.19, 0.37)  | 1.21 (0.73, 1.99) |
| Cabo Delgado                      | 1.32 (0.87, 2.00) | 1.03 (0.56, 1.91) | 0.26 (0.19, 0.35)  | 1.17 (0.76, 1.79) |
| Nampula                           | 0.83 (0.51, 1.34) | 0.67 (0.35, 1.29) | 0.30 (0.20, 0.44)  | 1.25 (0.78, 2.00) |
| Zambezia                          | 1.99 (1.39, 2.86) | 1.63 (0.95, 2.79) | 0.12 (0.08, 0.18)  | 0.51 (0.31, 0.83) |
| Tete                              | 1.35 (0.91, 1.99) | 1.32 (0.74, 2.38) | 0.21 (0.16, 0.28)  | 0.80 (0.53, 1.21) |
| Manica                            | 1.27 (0.84, 1.90) | 1.29 (0.78, 2.15) | 0.31 (0.24, 0.41)  | 0.73 (0.54, 1.01) |
| Sofala                            | 1.43 (1.00, 2.04) | 1.14 (0.68, 1.89) | 0.22 (0.15, 0.33)  | 0.65 (0.42, 1.01) |
| Inhambane                         | 0.71 (0.46, 1.09) | 0.61 (0.34, 1.10) | 0.61 (0.47, 0.80)  | 1.24 (0.92, 1.68) |
| Gaza                              | 0.83 (0.55, 1.26) | 0.90 (0.57, 1.40) | 0.52 (0.40, 0.68)  | 0.83 (0.64, 1.08) |
| Maputo Cidade                     | 1.06 (0.74, 1.53) | 1.00 (0.67, 1.49) | 1.15 (0.94, 1.42)  | 0.96 (0.80, 1.16) |
| <b>Level of Education</b>         |                   |                   |                    |                   |
| No Education (Reference)          | 1.00              | 1.00              | 1.00               | 1.00              |
| Primary                           | 1.05 (0.85, 1.28) | 0.97 (0.79, 1.18) | 1.63 (1.40, 1.91)  | 1.25 (1.03, 1.50) |
| Secondary                         | 0.79 (0.62, 1.00) | 0.67 (0.49, 0.93) | 2.79 (2.32, 3.35)  | 1.38 (1.08, 1.76) |
| Higher                            | 1.14 (0.62, 2.12) | 1.05 (0.55, 2.03) | 8.23 (5.82, 11.6)  | 1.91 (1.17, 3.10) |
| <b>Wealth Quintile</b>            |                   |                   |                    |                   |
| Poorest (Reference)               | 1.00              | 1.00              | 1.00               | 1.00              |
| Poorer                            | 0.91 (0.72, 1.15) | 0.94 (0.74, 1.20) | 1.17 (0.77, 1.77)  | 0.99 (0.65, 1.52) |
| Middle                            | 0.59 (0.45, 0.77) | 0.66 (0.51, 0.86) | 2.02 (1.42, 2.86)  | 1.56 (1.07, 2.26) |
| Richer                            | 0.53 (0.39, 0.71) | 0.71 (0.52, 0.96) | 3.49 (2.46, 4.95)  | 2.27 (1.56, 3.30) |
| Richest                           | 0.60 (0.46, 0.77) | 0.76 (0.51, 1.14) | 9.76 (6.89, 13.8)  | 5.17 (3.41, 7.85) |
| <b>Occupation</b>                 |                   |                   |                    |                   |
| Not Working (Reference)           | 1.00              | 1.00              | 1.00               | 1.00              |
| Nonmanual                         | 0.65 (0.50, 0.84) | 0.92 (0.69, 1.22) | 2.73 (2.35, 3.17)  | 1.07 (0.91, 1.26) |
| Manual                            | 0.54 (0.21, 1.41) | 0.78 (0.30, 1.97) | 2.63 (1.73, 4.02)  | 1.14 (0.73, 1.80) |
| Agricultural                      | 1.16 (0.97, 1.38) | 1.36 (1.13, 1.65) | 0.69 (0.58, 0.84)  | 0.83 (0.68, 1.02) |
| <b>Media Exposure</b>             |                   |                   |                    |                   |
| Not Exposed (Reference)           | 1.00              | 1.00              | 1.00               | 1.00              |
| Exposed to one media source       | 0.79 (0.64, 0.97) | 0.75 (0.59, 0.94) | 1.12 (0.94, 1.32)  | 1.05 (0.87, 1.27) |
| Exposed to two media sources      | 0.66 (0.51, 0.87) | 0.76 (0.55, 1.06) | 2.43 (2.02, 2.92)  | 1.18 (0.94, 1.49) |
| Exposed to three media sources    | 0.75 (0.56, 1.01) | 0.85 (0.56, 1.29) | 3.69 (3.00, 4.53)  | 1.25 (0.97, 1.62) |
| <b>Hormonal Contraceptive Use</b> |                   |                   |                    |                   |
| No (Reference)                    | 1.00              | 1.00              | 1.00               | 1.00              |
| Yes                               | 0.54 (0.38, 0.77) | 0.86 (0.60, 1.24) | 2.41 (2.09, 2.77)  | 1.35 (1.16, 1.58) |

Overall Model Fit:  $F(108, 482) = 13.93, P=0.0000$ .

**Table S53:** Unadjusted and adjusted relative risk ratio, of underweight and overweight/obesity among women of child-bearing age in Malawi.

| VARIABLES                  | UNDERWEIGHT                |                          | OVERWEIGHT/OBESITY         |                          |
|----------------------------|----------------------------|--------------------------|----------------------------|--------------------------|
|                            | Unadjusted<br>RRR (95% CI) | Adjusted<br>RRR (95% CI) | Unadjusted<br>RRR (95% CI) | Adjusted<br>RRR (95% CI) |
| <b>Age</b>                 |                            |                          |                            |                          |
| 15-19 (Reference)          | 1.00                       | 1.00                     | 1.00                       | 1.00                     |
| 20-24                      | 0.39 (0.27, 0.56)          | 0.76 (0.49, 1.18)        | 2.03 (1.45, 2.84)          | 2.18 (1.43, 3.33)        |
| 25-29                      | 0.45 (0.30, 0.67)          | 1.02 (0.58, 1.81)        | 3.61 (2.63, 4.96)          | 4.41 (2.69, 7.25)        |
| 30-34                      | 0.61 (0.41, 0.92)          | 1.40 (0.78, 2.53)        | 5.27 (4.01, 6.95)          | 7.58 (4.73, 12.1)        |
| 35-39                      | 0.49 (0.33, 0.74)          | 1.22 (0.66, 2.23)        | 5.66 (4.06, 7.89)          | 8.98 (5.38, 15.0)        |
| 40-44                      | 0.60 (0.39, 0.93)          | 1.34 (0.72, 2.49)        | 4.63 (3.28, 6.55)          | 7.47 (4.45, 12.5)        |
| 45-49                      | 0.55 (0.33, 0.91)          | 1.20 (0.59, 2.44)        | 5.37 (3.84, 7.49)          | 8.81 (5.14, 15.1)        |
| <b>Ethnicity</b>           |                            |                          |                            |                          |
| Chewa (Reference)          | 1.00                       | 1.00                     | 1.00                       | 1.00                     |
| Tombuka                    | 0.88 (0.55, 1.42)          | 0.88 (0.44, 1.79)        | 1.43 (1.07, 1.90)          | 1.01 (0.64, 1.61)        |
| Lomwe                      | 1.37 (1.02, 1.85)          | 1.30 (0.84, 2.00)        | 1.12 (0.90, 1.40)          | 0.95 (0.72, 1.25)        |
| Tonga                      | 1.30 (0.69, 2.46)          | 1.31 (0.58, 2.97)        | 1.42 (0.88, 2.29)          | 0.94 (0.50, 1.75)        |
| Yao                        | 1.08 (0.73, 1.58)          | 0.66 (0.40, 1.09)        | 1.17 (0.89, 1.54)          | 1.05 (0.72, 1.54)        |
| Sena                       | 0.80 (0.45, 1.42)          | 0.77 (0.40, 1.48)        | 0.98 (0.65, 1.48)          | 0.75 (0.48, 1.16)        |
| Nkhonde                    | 1.01 (0.45, 2.28)          | 0.96 (0.38, 2.47)        | 1.93 (0.97, 3.83)          | 1.15 (0.55, 2.38)        |
| Ngoni                      | 1.28 (0.87, 1.90)          | 1.34 (0.89, 2.02)        | 1.73 (1.37, 2.19)          | 1.45 (1.13, 1.86)        |
| Mang'anja                  | 1.30 (0.69, 2.46)          | 1.27 (0.62, 2.61)        | 1.39 (0.78, 2.48)          | 0.88 (0.50, 1.53)        |
| Nyanja                     | 0.64 (0.22, 1.90)          | 0.62 (0.21, 1.84)        | 1.42 (0.80, 2.55)          | 1.07 (0.54, 2.12)        |
| Others                     | 0.25 (0.10, 0.65)          | 0.29 (0.10, 0.84)        | 1.91 (1.23, 2.98)          | 1.36 (0.80, 2.30)        |
| <b>Religion</b>            |                            |                          |                            |                          |
| Catholics (Reference)      | 1.00                       | 1.00                     | 1.00                       | 1.00                     |
| Other Christians           | 0.86 (0.67, 1.11)          | 0.94 (0.72, 1.21)        | 1.04 (0.87, 1.25)          | 1.03 (0.85, 1.25)        |
| Islam                      | 1.11 (0.75, 1.64)          | 1.63 (1.01, 2.62)        | 0.87 (0.62, 1.21)          | 0.95 (0.63, 1.45)        |
| Others                     | 0.89 (0.10, 8.37)          | 0.99 (0.09, 11.1)        | 0.87 (0.15, 4.96)          | 0.84 (0.18, 3.82)        |
| No Religion                | 1.84 (0.57, 6.00)          | 2.08 (0.63, 6.95)        | 1.36 (0.39, 4.68)          | 1.57 (0.45, 5.50)        |
| <b>Parity</b>              |                            |                          |                            |                          |
| 0 (Reference)              | 1.00                       | 1.00                     | 1.00                       | 1.00                     |
| 1                          | 0.45 (0.31, 0.66)          | 0.91 (0.57, 1.44)        | 1.32 (1.00, 1.72)          | 0.61 (0.39, 0.94)        |
| 2                          | 0.36 (0.24, 0.55)          | 0.76 (0.43, 1.36)        | 1.91 (1.44, 2.54)          | 0.58 (0.35, 0.96)        |
| 3                          | 0.54 (0.35, 0.83)          | 0.97 (0.51, 1.84)        | 2.23 (1.68, 2.97)          | 0.50 (0.29, 0.83)        |
| 4                          | 0.63 (0.40, 0.99)          | 0.96 (0.49, 1.88)        | 2.36 (1.78, 3.12)          | 0.47 (0.28, 0.80)        |
| 5                          | 0.45 (0.29, 0.70)          | 0.63 (0.31, 1.27)        | 1.84 (1.35, 2.50)          | 0.37 (0.21, 0.65)        |
| 6+                         | 0.49 (0.34, 0.71)          | 0.64 (0.33, 1.22)        | 2.44 (1.89, 3.14)          | 0.50 (0.29, 0.86)        |
| <b>Marital Status</b>      |                            |                          |                            |                          |
| Single (Reference)         | 1.00                       | 1.00                     | 1.00                       | 1.00                     |
| Married                    | 0.43 (0.33, 0.56)          | 0.50 (0.32, 0.80)        | 2.13 (1.71, 2.67)          | 1.31 (0.83, 2.07)        |
| Formerly Married           | 0.56 (0.39, 0.82)          | 0.53 (0.32, 0.88)        | 2.05 (1.55, 2.72)          | 1.35 (0.84, 2.16)        |
| <b>Residential Setting</b> |                            |                          |                            |                          |
| Rural (Reference)          | 1.00                       | 1.00                     | 1.00                       | 1.00                     |
| Urban                      | 1.11 (0.78, 1.59)          | 1.25 (0.81, 1.93)        | 2.78 (2.35, 3.29)          | 1.41 (1.13, 1.76)        |
| <b>Region</b>              |                            |                          |                            |                          |
| Central (Reference)        | 1.00                       | 1.00                     | 1.00                       | 1.00                     |
| Northern                   | 0.89 (0.62, 1.29)          | 1.09 (0.58, 2.05)        | 1.23 (0.99, 1.52)          | 1.11 (0.73, 1.68)        |
| Southern                   | 1.21 (0.95, 1.55)          | 1.08 (0.74, 1.58)        | 1.00 (0.85, 1.18)          | 1.02 (0.82, 1.26)        |
| <b>Level of Education</b>  |                            |                          |                            |                          |
| No Education (Reference)   | 1.00                       | 1.00                     | 1.00                       | 1.00                     |
| Primary                    | 1.04 (0.75, 1.45)          | 0.95 (0.67, 1.36)        | 0.70 (0.56, 0.86)          | 0.77 (0.60, 0.99)        |
| Secondary                  | 0.95 (0.64, 1.42)          | 0.75 (0.45, 1.24)        | 1.21 (0.95, 1.53)          | 0.86 (0.63, 1.17)        |
| Higher                     | 0.29 (0.05, 1.60)          | 0.24 (0.04, 1.43)        | 2.21 (1.42, 3.45)          | 0.76 (0.42, 1.37)        |



|                                    | UNDERWEIGHT       |                   | OVERWEIGHT/OBESITY |                   |
|------------------------------------|-------------------|-------------------|--------------------|-------------------|
| <b>Wealth Quintile</b>             |                   |                   |                    |                   |
| Poorest (Reference)                | 1.00              | 1.00              | 1.00               | 1.00              |
| Poorer                             | 0.79 (0.56, 1.12) | 0.77 (0.54, 1.11) | 1.05 (0.75, 1.46)  | 1.07 (0.77, 1.50) |
| Middle                             | 0.87 (0.63, 1.20) | 0.83 (0.59, 1.17) | 1.57 (1.13, 2.18)  | 1.51 (1.08, 2.11) |
| Richer                             | 0.96 (0.68, 1.35) | 0.92 (0.63, 1.34) | 2.23 (1.62, 3.07)  | 1.96 (1.42, 2.71) |
| Richest                            | 0.94 (0.66, 1.35) | 0.94 (0.60, 1.47) | 4.20 (3.11, 5.67)  | 2.95 (2.08, 4.19) |
| <b>Occupation</b>                  |                   |                   |                    |                   |
| Not Working (Reference)            | 1.00              | 1.00              | 1.00               | 1.00              |
| Nonmanual                          | 0.57 (0.37, 0.89) | 0.85 (0.52, 1.39) | 2.28 (1.79, 2.90)  | 1.08 (0.83, 1.42) |
| Manual                             | 0.87 (0.60, 1.24) | 1.16 (0.80, 1.69) | 1.53 (1.23, 1.91)  | 1.15 (0.90, 1.48) |
| Agricultural                       | 0.78 (0.60, 1.01) | 1.04 (0.77, 1.39) | 0.73 (0.61, 0.89)  | 0.71 (0.58, 0.88) |
| <b>Media Exposure</b>              |                   |                   |                    |                   |
| Not Exposed (Reference)            | 1.00              | 1.00              | 1.00               | 1.00              |
| Exposed to one media source        | 0.72 (0.54, 0.97) | 0.76 (0.56, 1.04) | 1.32 (1.11, 1.57)  | 1.04 (0.87, 1.26) |
| Exposed to two media sources       | 0.75 (0.53, 1.07) | 0.74 (0.51, 1.09) | 1.96 (1.58, 2.42)  | 1.17 (0.91, 1.49) |
| Exposed to three media sources     | 0.66 (0.41, 1.06) | 0.64 (0.37, 1.09) | 2.41 (1.90, 3.07)  | 1.05 (0.77, 1.43) |
| <b>Hormonal Contraceptives use</b> |                   |                   |                    |                   |
| No (Reference)                     | 1.00              | 1.00              | 1.00               | 1.00              |
| Yes                                | 0.49 (0.38, 0.64) | 0.67 (0.50, 0.90) | 1.23 (1.06, 1.44)  | 1.32 (1.10, 1.60) |

Overall Model Fit:  $F(90, 705) = 9.22, P=0.0000$ .

**Table S54:** Unadjusted and adjusted relative risk ratio, of underweight and overweight/obesity among women of child-bearing age in Ivory Coast.

| VARIABLES                   | UNDERWEIGHT                |                          | OVERWEIGHT/OBESITY         |                          |
|-----------------------------|----------------------------|--------------------------|----------------------------|--------------------------|
|                             | Unadjusted<br>RRR (95% CI) | Adjusted<br>RRR (95% CI) | Unadjusted<br>RRR (95% CI) | Adjusted<br>RRR (95% CI) |
| <b>Age</b>                  |                            |                          |                            |                          |
| 15-19 (Reference)           | 1.00                       | 1.00                     | 1.00                       | 1.00                     |
| 20-24                       | 0.38 (0.25, 0.57)          | 0.65 (0.40, 1.05)        | 1.88 (1.31, 2.71)          | 1.84 (1.28, 2.64)        |
| 25-29                       | 0.34 (0.23, 0.52)          | 0.88 (0.49, 1.59)        | 2.74 (1.88, 3.99)          | 2.80 (1.83, 4.31)        |
| 30-34                       | 0.37 (0.21, 0.66)          | 1.20 (0.58, 2.48)        | 4.98 (3.38, 7.35)          | 5.24 (3.15, 8.71)        |
| 35-39                       | 0.38 (0.23, 0.65)          | 1.47 (0.74, 2.94)        | 4.44 (3.05, 6.46)          | 5.14 (3.10, 8.53)        |
| 40-44                       | 0.41 (0.24, 0.70)          | 1.68 (0.78, 3.65)        | 5.11 (3.58, 7.28)          | 6.78 (4.08, 11.3)        |
| 45-49                       | 0.37 (0.21, 0.65)          | 1.53 (0.71, 3.28)        | 5.13 (3.62, 7.26)          | 6.42 (3.83, 10.8)        |
| <b>Ethnicity</b>            |                            |                          |                            |                          |
| Akan (Reference)            | 1.00                       | 1.00                     | 1.00                       | 1.00                     |
| Krou                        | 0.95 (0.58, 1.55)          | 0.90 (0.48, 1.67)        | 0.91 (0.65, 1.28)          | 0.80 (0.55, 1.17)        |
| Mandé du nord               | 1.13 (0.70, 1.81)          | 1.29 (0.68, 2.46)        | 1.58 (1.15, 2.15)          | 0.92 (0.57, 1.49)        |
| Mandé du sud                | 0.77 (0.44, 1.35)          | 0.74 (0.38, 1.45)        | 0.80 (0.54, 1.20)          | 0.84 (0.50, 1.41)        |
| Voltaïque/Gur               | 1.23 (0.79, 1.94)          | 1.25 (0.77, 2.03)        | 0.78 (0.54, 1.12)          | 0.77 (0.48, 1.26)        |
| Autres nationalités         | 1.14 (0.75, 1.72)          | 1.30 (0.80, 2.10)        | 1.04 (0.77, 1.39)          | 0.84 (0.57, 1.24)        |
| <b>Religion</b>             |                            |                          |                            |                          |
| Catholics (Reference)       | 1.00                       | 1.00                     | 1.00                       | 1.00                     |
| Other Christians            | 1.07 (0.67, 1.71)          | 1.21 (0.76, 1.94)        | 0.98 (0.73, 1.30)          | 1.01 (0.74, 1.36)        |
| Islam                       | 1.14 (0.74, 1.77)          | 1.23 (0.78, 1.94)        | 1.26 (0.97, 1.63)          | 1.33 (0.92, 1.93)        |
| Traditionalist              | 1.04 (0.43, 2.52)          | 1.37 (0.50, 3.76)        | 0.77 (0.42, 1.39)          | 1.39 (0.69, 2.79)        |
| Others                      | 0.80 (0.18, 3.46)          | 1.05 (0.21, 5.21)        | 0.94 (0.38, 2.34)          | 1.28 (0.54, 3.02)        |
| No Religion                 | 0.81 (0.45, 1.47)          | 1.01 (0.54, 1.88)        | 0.53 (0.37, 0.75)          | 0.93 (0.63, 1.36)        |
| <b>Parity</b>               |                            |                          |                            |                          |
| 0 (Reference)               | 1.00                       | 1.00                     | 1.00                       | 1.00                     |
| 1                           | 0.61 (0.39, 0.95)          | 0.87 (0.53, 1.43)        | 1.33 (0.95, 1.85)          | 0.94 (0.60, 1.47)        |
| 2                           | 0.36 (0.23, 0.57)          | 0.62 (0.35, 1.11)        | 1.36 (0.93, 1.98)          | 0.82 (0.50, 1.34)        |
| 3                           | 0.34 (0.17, 0.68)          | 0.57 (0.27, 1.23)        | 1.96 (1.42, 2.69)          | 1.05 (0.64, 1.73)        |
| 4                           | 0.56 (0.32, 0.99)          | 0.86 (0.41, 1.82)        | 3.13 (2.10, 4.66)          | 1.91 (1.03, 3.56)        |
| 5                           | 0.26 (0.14, 0.47)          | 0.39 (0.18, 0.85)        | 1.52 (1.04, 2.24)          | 0.69 (0.38, 1.24)        |
| 6+                          | 0.30 (0.19, 0.48)          | 0.38 (0.19, 0.77)        | 1.91 (1.45, 2.51)          | 1.02 (0.59, 1.76)        |
| <b>Marital Status</b>       |                            |                          |                            |                          |
| Single (Reference)          | 1.00                       | 1.00                     | 1.00                       | 1.00                     |
| Married                     | 0.36 (0.27, 0.47)          | 0.46 (0.29, 0.73)        | 1.76 (1.44, 2.15)          | 1.11 (0.77, 1.61)        |
| Formerly Married            | 0.47 (0.25, 0.88)          | 0.57 (0.26, 1.25)        | 2.66 (1.85, 3.83)          | 1.29 (0.82, 2.03)        |
| <b>Residential Setting</b>  |                            |                          |                            |                          |
| Rural (Reference)           | 1.00                       | 1.00                     | 1.00                       | 1.00                     |
| Urban                       | 1.31 (0.98, 1.76)          | 1.59 (0.82, 3.09)        | 2.73 (2.23, 3.35)          | 1.67 (1.15, 2.43)        |
| <b>Region</b>               |                            |                          |                            |                          |
| Ville d'Abidjan (Reference) | 1.00                       | 1.00                     | 1.00                       | 1.00                     |
| Centre                      | 0.77 (0.48, 1.23)          | 0.82 (0.47, 1.45)        | 0.40 (0.25, 0.63)          | 0.73 (0.45, 1.17)        |
| Centre-Est                  | 1.20 (0.68, 2.12)          | 1.29 (0.69, 2.42)        | 0.46 (0.30, 0.70)          | 0.84 (0.52, 1.34)        |
| Centre-Nord                 | 0.69 (0.38, 1.25)          | 0.65 (0.36, 1.17)        | 0.46 (0.31, 0.66)          | 0.68 (0.46, 0.99)        |
| Centre-Ouest                | 0.84 (0.46, 1.54)          | 1.02 (0.53, 1.95)        | 0.53 (0.38, 0.75)          | 1.07 (0.72, 1.58)        |
| Nord                        | 1.05 (0.60, 1.82)          | 1.42 (0.77, 2.60)        | 0.26 (0.17, 0.40)          | 0.50 (0.31, 0.81)        |
| Nord-est                    | 1.24 (0.79, 1.93)          | 1.08 (0.61, 1.92)        | 0.21 (0.14, 0.34)          | 0.49 (0.28, 0.85)        |
| Nord-Ouest                  | 1.03 (0.65, 1.63)          | 1.33 (0.73, 2.42)        | 0.36 (0.24, 0.54)          | 0.71 (0.42, 1.22)        |
| Ouest                       | 0.77 (0.42, 1.41)          | 1.00 (0.48, 2.08)        | 0.40 (0.27, 0.58)          | 0.88 (0.56, 1.37)        |
| Sud sans Abidjan            | 0.75 (0.41, 1.38)          | 0.76 (0.38, 1.49)        | 0.54 (0.37, 0.79)          | 0.94 (0.61, 1.46)        |
| Sud-ouest                   | 0.58 (0.30, 1.13)          | 0.63 (0.33, 1.21)        | 0.31 (0.20, 0.50)          | 0.76 (0.47, 1.24)        |

|                                   | UNDERWEIGHT       |                   | OVERWEIGHT/OBESITY |                   |
|-----------------------------------|-------------------|-------------------|--------------------|-------------------|
| <b>Level of Education</b>         |                   |                   |                    |                   |
| No Education (Reference)          | 1.00              | 1.00              | 1.00               | 1.00              |
| Primary                           | 1.53 (1.05, 2.23) | 1.51 (1.02, 2.24) | 1.32 (1.08, 1.61)  | 1.33 (1.04, 1.71) |
| Secondary                         | 1.80 (1.25, 2.59) | 1.35 (0.79, 2.31) | 1.20 (0.93, 1.55)  | 1.10 (0.76, 1.60) |
| Higher                            | 0.05 (0.01, 0.40) | 0.04 (0.01, 0.38) | 2.02 (1.02, 4.00)  | 1.24 (0.60, 2.56) |
| <b>Wealth Quintile</b>            |                   |                   |                    |                   |
| Poorest (Reference)               | 1.00              | 1.00              | 1.00               | 1.00              |
| Poorer                            | 1.00 (0.65, 1.56) | 0.88 (0.56, 1.39) | 1.55 (1.06, 2.27)  | 1.33 (0.86, 2.05) |
| Middle                            | 0.92 (0.58, 1.45) | 0.54 (0.30, 0.96) | 1.95 (1.33, 2.87)  | 1.44 (0.91, 2.29) |
| Richer                            | 0.87 (0.56, 1.37) | 0.41 (0.21, 0.83) | 3.41 (2.42, 4.79)  | 1.71 (1.08, 2.71) |
| Richest                           | 1.23 (0.82, 1.85) | 0.51 (0.25, 1.05) | 4.07 (2.89, 5.74)  | 2.16 (1.28, 3.63) |
| <b>Occupation</b>                 |                   |                   |                    |                   |
| Not Working (Reference)           | 1.00              | 1.00              | 1.00               | 1.00              |
| Nonmanual                         | 0.49 (0.33, 0.72) | 0.56 (0.39, 0.82) | 2.10 (1.67, 2.64)  | 1.31 (1.01, 1.70) |
| Manual                            | 1.02 (0.55, 1.88) | 1.02 (0.53, 1.97) | 1.29 (0.84, 2.00)  | 1.21 (0.74, 1.97) |
| Agricultural                      | 0.58 (0.41, 0.84) | 0.82 (0.52, 1.28) | 0.64 (0.47, 0.86)  | 0.74 (0.51, 1.07) |
| <b>Media Exposure</b>             |                   |                   |                    |                   |
| Not Exposed (Reference)           | 1.00              | 1.00              | 1.00               | 1.00              |
| Exposed to one media source       | 1.11 (0.74, 1.66) | 0.98 (0.63, 1.54) | 1.68 (1.29, 2.18)  | 1.10 (0.81, 1.49) |
| Exposed to two media sources      | 1.08 (0.74, 1.58) | 0.82 (0.52, 1.29) | 2.21 (1.73, 2.83)  | 1.23 (0.91, 1.66) |
| Exposed to three media sources    | 1.01 (0.60, 1.69) | 0.69 (0.34, 1.39) | 2.53 (1.80, 3.54)  | 1.27 (0.79, 2.03) |
| <b>Hormonal Contraceptive Use</b> |                   |                   |                    |                   |
| No (Reference)                    | 1.00              | 1.00              | 1.00               | 1.00              |
| Yes                               | 0.61 (0.33, 1.14) | 0.83 (0.43, 1.59) | 1.84 (1.41, 2.41)  | 1.38 (0.99, 1.90) |

Overall Model Fit:  $F(98, 233) = 6.43, P=0.0000$ .

**Table S55:** Unadjusted and adjusted relative risk ratio, of underweight and overweight/obesity among women of child-bearing age in Rwanda.

| VARIABLES                  | UNDERWEIGHT             |                       | OVERWEIGHT/OBESITY      |                       |
|----------------------------|-------------------------|-----------------------|-------------------------|-----------------------|
|                            | Unadjusted RRR (95% CI) | Adjusted RRR (95% CI) | Unadjusted RRR (95% CI) | Adjusted RRR (95% CI) |
| <b>Age</b>                 |                         |                       |                         |                       |
| 15-19 (Reference)          | 1.00                    | 1.00                  | 1.00                    | 1.00                  |
| 20-24                      | 0.30 (0.21, 0.43)       | 0.35 (0.24, 0.52)     | 1.47 (1.18, 1.83)       | 1.32(1.01, 1.73)      |
| 25-29                      | 0.45 (0.31, 0.65)       | 0.60 (0.37, 0.99)     | 1.66 (1.30, 2.10)       | 1.23 (0.91, 1.66)     |
| 30-34                      | 0.54 (0.37, 0.80)       | 0.77 (0.43, 1.38)     | 1.92 (1.53, 2.40)       | 1.28 (0.92, 1.79)     |
| 35-39                      | 0.61 (0.42, 0.91)       | 0.92 (0.50, 1.71)     | 2.29 (1.80, 2.91)       | 1.37 (0.94, 2.00)     |
| 40-44                      | 0.55 (0.36, 0.83)       | 0.79 (0.42, 1.51)     | 1.95 (1.51, 2.51)       | 1.29 (0.86, 1.95)     |
| 45-49                      | 1.02 (0.71, 1.46)       | 1.42 (0.76, 2.66)     | 1.67 (1.26, 2.21)       | 1.25 (0.81, 1.93)     |
| <b>Religion</b>            |                         |                       |                         |                       |
| Catholics (Reference)      | 1.00                    | 1.00                  | 1.00                    | 1.00                  |
| Other Christians           | 0.83 (0.66, 1.04)       | 0.88 (0.69, 1.12)     | 1.22 (1.06, 1.40)       | 1.18 (1.02, 1.35)     |
| Islam                      | 0.65 (0.29, 1.45)       | 0.58 (0.24, 1.42)     | 1.94 (1.21, 3.12)       | 1.07 (0.68, 1.67)     |
| No Religion                | 1.62 (0.34, 7.63)       | 1.78 (0.38, 8.36)     | 2.05 (0.73, 5.81)       | 2.41 (0.82, 7.07)     |
| <b>Parity</b>              |                         |                       |                         |                       |
| 0 (Reference)              | 1.00                    | 1.00                  | 1.00                    | 1.00                  |
| 1                          | 0.53 (0.36, 0.77)       | 0.84 (0.48, 1.48)     | 1.22 (0.99, 1.52)       | 0.87 (0.64, 1.19)     |
| 2                          | 0.64 (0.45, 0.92)       | 0.91 (0.46, 1.82)     | 1.57 (1.26, 1.97)       | 1.11 (0.77, 1.60)     |
| 3                          | 0.51 (0.33, 0.79)       | 0.60 (0.28, 1.27)     | 1.62 (1.29, 2.03)       | 1.21 (0.80, 1.81)     |
| 4                          | 0.87 (0.59, 1.29)       | 0.91 (0.42, 1.97)     | 1.73 (1.38, 2.16)       | 1.39 (0.93, 2.08)     |
| 5                          | 1.07 (0.70, 1.63)       | 1.02 (0.47, 2.21)     | 1.94 (1.48, 2.55)       | 1.59 (1.01, 2.49)     |
| 6+                         | 0.69 (0.47, 1.00)       | 0.60 (0.27, 1.37)     | 1.60 (1.29, 1.99)       | 1.47 (0.93, 2.31)     |
| <b>Marital Status</b>      |                         |                       |                         |                       |
| Single (Reference)         | 1.00                    | 1.00                  | 1.00                    | 1.00                  |
| Married                    | 0.63 (0.50, 0.80)       | 0.97 (0.56, 1.69)     | 1.76 (1.52, 2.05)       | 1.58 (1.19, 2.11)     |
| Formerly Married           | 1.14 (0.82, 1.58)       | 1.10 (0.62, 1.98)     | 1.32 (1.05, 1.65)       | 1.46 (1.02, 2.08)     |
| <b>Residential Setting</b> |                         |                       |                         |                       |
| Rural (Reference)          | 1.00                    | 1.00                  | 1.00                    | 1.00                  |
| Urban                      | 1.05 (0.81, 1.35)       | 1.24 (0.88, 1.74)     | 2.86 (2.43, 3.37)       | 1.45 (1.14, 1.85)     |
| <b>Region</b>              |                         |                       |                         |                       |
| Kigali City (Reference)    | 1.00                    | 1.00                  | 1.00                    | 1.00                  |
| South                      | 1.39 (0.99, 1.94)       | 1.31 (0.87, 1.97)     | 0.38 (0.31, 0.47)       | 1.02 (0.77, 1.37)     |
| West                       | 0.73 (0.49, 1.09)       | 0.65 (0.41, 1.03)     | 0.46 (0.37, 0.59)       | 1.23 (0.90, 1.70)     |
| North                      | 0.70 (0.45, 1.08)       | 0.64 (0.39, 1.06)     | 0.49 (0.38, 0.62)       | 1.34 (0.98, 1.83)     |
| East                       | 1.15 (0.80, 1.65)       | 1.24 (0.82, 1.88)     | 0.48 (0.39, 0.60)       | 1.26 (0.93, 1.70)     |
| <b>Level of Education</b>  |                         |                       |                         |                       |
| No Education (Reference)   | 1.00                    | 1.00                  | 1.00                    | 1.00                  |
| Primary                    | 0.86 (0.62, 1.20)       | 0.95 (0.67, 1.34)     | 1.27 (1.02, 1.58)       | 1.23 (0.98, 1.56)     |
| Secondary                  | 0.84 (0.58, 1.23)       | 0.83 (0.52, 1.34)     | 1.67 (1.30, 2.13)       | 1.33 (1.00, 1.77)     |
| Higher                     | 1.94 (1.02, 3.68)       | 2.58 (1.19, 5.57)     | 4.39 (2.87, 6.74)       | 1.77 (1.12, 2.80)     |
| <b>Wealth Quintile</b>     |                         |                       |                         |                       |
| Poorest (Reference)        | 1.00                    | 1.00                  | 1.00                    | 1.00                  |
| Poorer                     | 0.68 (0.49, 0.94)       | 0.68 (0.49, 0.94)     | 1.42 (1.09, 1.85)       | 1.33 (1.00, 1.76)     |
| Middle                     | 0.67 (0.48, 0.93)       | 0.69 (0.50, 0.95)     | 1.55 (1.21, 1.99)       | 1.42 (1.09, 1.85)     |
| Richer                     | 0.50 (0.35, 0.73)       | 0.45 (0.31, 0.67)     | 2.32 (1.78, 3.01)       | 2.03 (1.51, 2.72)     |
| Richest                    | 0.65 (0.48, 0.88)       | 0.43 (0.28, 0.64)     | 4.54 (3.56, 5.79)       | 2.72 (1.93, 3.85)     |
| <b>Occupation</b>          |                         |                       |                         |                       |
| Not Working (Reference)    | 1.00                    | 1.00                  | 1.00                    | 1.00                  |
| Nonmanual                  | 0.47 (0.32, 0.69)       | 0.55 (0.36, 0.83)     | 2.07 (1.67, 2.55)       | 1.26 (0.98, 1.61)     |
| Manual                     | 0.71 (0.39, 1.29)       | 0.79 (0.44, 1.43)     | 1.27 (0.87, 1.85)       | 0.97 (0.67, 1.39)     |
| Agricultural               | 0.54 (0.41, 0.70)       | 0.51 (0.37, 0.71)     | 0.68 (0.56, 0.81)       | 0.67 (0.52, 0.87)     |

|                                   | UNDERWEIGHT       |                   | OVERWEIGHT/OBESITY |                   |
|-----------------------------------|-------------------|-------------------|--------------------|-------------------|
| <b>Media Exposure</b>             |                   |                   |                    |                   |
| Not Exposed (Reference)           | 1.00              | 1.00              | 1.00               | 1.00              |
| Exposed to one media source       | 0.70 (0.52, 0.95) | 0.78 (0.56, 1.07) | 1.70 (1.32, 2.18)  | 1.41 (1.08, 1.84) |
| Exposed to two media sources      | 0.62 (0.45, 0.85) | 0.66 (0.46, 0.95) | 2.35 (1.83, 3.00)  | 1.53 (1.15, 2.03) |
| Exposed to three media sources    | 0.86 (0.61, 1.21) | 0.88 (0.58, 1.32) | 2.71 (2.10, 3.50)  | 1.51 (1.12, 2.04) |
| <b>Hormonal Contraceptive Use</b> |                   |                   |                    |                   |
| No (Reference)                    | 1.00              | 1.00              | 1.00               | 1.00              |
| Yes                               | 0.48 (0.35, 0.65) | 0.63 (0.45, 0.88) | 1.55 (1.34, 1.80)  | 1.33 (1.11, 1.61) |

Overall Model Fit:  $F(72, 361) = 8.40, P=0.0000$ .

**Table S56:** Unadjusted and adjusted relative risk ratio, of underweight and overweight/obesity among women of child-bearing age in Liberia.

| VARIABLES                    | UNDERWEIGHT                |                          | OVERWEIGHT/OBESITY         |                          |
|------------------------------|----------------------------|--------------------------|----------------------------|--------------------------|
|                              | Unadjusted<br>RRR (95% CI) | Adjusted<br>RRR (95% CI) | Unadjusted<br>RRR (95% CI) | Adjusted<br>RRR (95% CI) |
| <b>Age</b>                   |                            |                          |                            |                          |
| 15-19 (Reference)            | 1.00                       | 1.00                     | 1.00                       | 1.00                     |
| 20-24                        | 0.36 (0.22, 0.58)          | 0.56 (0.32, 1.00)        | 2.18 (1.17, 4.05)          | 1.40 (0.67, 2.89)        |
| 25-29                        | 0.29 (0.16, 0.53)          | 0.47 (0.22, 1.01)        | 4.18 (2.31, 7.55)          | 2.25 (1.08, 4.69)        |
| 30-34                        | 0.45 (0.27, 0.78)          | 0.66 (0.34, 1.28)        | 6.13 (3.47, 10.8)          | 3.00 (1.36, 6.61)        |
| 35-39                        | 0.32 (0.16, 0.65)          | 0.54 (0.18, 1.59)        | 8.60 (4.97, 14.9)          | 4.11 (1.86, 9.08)        |
| 40-44                        | 0.69 (0.37, 1.29)          | 1.22 (0.45, 3.33)        | 10.4 (5.94, 18.2)          | 5.61 (2.47, 12.7)        |
| 45-49                        | 0.86 (0.45, 1.63)          | 1.53 (0.54, 4.35)        | 10.8 (6.05, 19.3)          | 6.38 (2.92, 13.9)        |
| <b>Ethnicity</b>             |                            |                          |                            |                          |
| Kpelle (Reference)           | 1.00                       | 1.00                     | 1.00                       | 1.00                     |
| Bassa                        | 1.29 (0.81, 2.06)          | 2.10 (1.09, 4.02)        | 0.78 (0.57, 1.05)          | 0.59 (0.38, 0.93)        |
| Gio                          | 1.52 (0.73, 3.13)          | 2.77 (0.50, 15.5)        | 0.65 (0.34, 1.24)          | 0.72 (0.35, 1.45)        |
| Gola                         | 0.77 (0.39, 1.52)          | 1.24 (0.59, 2.59)        | 1.23 (0.83, 1.84)          | 0.84 (0.47, 1.51)        |
| Grebo                        | 0.85 (0.47, 1.54)          | 1.86 (0.61, 5.64)        | 1.27 (0.78, 2.07)          | 1.01 (0.44, 2.32)        |
| Kissi                        | 0.77 (0.37, 1.63)          | 1.01 (0.44, 2.30)        | 1.47 (0.75, 2.88)          | 1.28 (0.63, 2.64)        |
| Krahn                        | 0.49 (0.25, 0.94)          | 0.76 (0.33, 1.72)        | 1.28 (0.79, 2.06)          | 1.13 (0.47, 2.75)        |
| Kru                          | 0.85 (0.38, 1.90)          | 2.03 (0.64, 6.38)        | 1.89 (1.21, 2.97)          | 1.15 (0.52, 2.52)        |
| Lorma                        | 0.99 (0.40, 2.44)          | 1.53 (0.59, 3.94)        | 1.22 (0.69, 2.15)          | 1.07 (0.51, 2.25)        |
| Mano                         | 0.26 (0.11, 0.60)          | 0.48 (0.12, 2.01)        | 0.81 (0.57, 1.17)          | 0.90 (0.46, 1.75)        |
| Vai                          | 1.03 (0.33, 3.17)          | 2.01 (0.57, 7.14)        | 1.91 (1.13, 3.24)          | 1.41 (0.70, 2.83)        |
| Others                       | 1.30 (0.71, 2.38)          | 2.08 (1.08, 4.01)        | 1.02 (0.70, 1.49)          | 0.82 (0.50, 1.36)        |
| <b>Religion</b>              |                            |                          |                            |                          |
| Other Christians (Reference) | 1.00                       | 1.00                     | 1.00                       | 1.00                     |
| Islam                        | 0.80 (0.39, 1.64)          | 0.67 (0.30, 1.50)        | 1.23 (0.93, 1.64)          | 1.07 (0.70, 1.65)        |
| No Religion                  | 0.76 (0.29, 1.98)          | 0.69 (0.30, 1.57)        | 0.53 (0.28, 0.98)          | 0.94 (0.41, 2.13)        |
| <b>Parity</b>                |                            |                          |                            |                          |
| 0 (Reference)                | 1.00                       | 1.00                     | 1.00                       | 1.00                     |
| 1                            | 0.33 (0.20, 0.54)          | 0.52 (0.31, 0.87)        | 2.21 (1.45, 3.36)          | 1.62 (0.94, 2.80)        |
| 2                            | 0.40 (0.25, 0.64)          | 0.67 (0.40, 1.14)        | 3.81 (2.38, 6.11)          | 2.07 (1.08, 3.98)        |
| 3                            | 0.40 (0.19, 0.86)          | 0.64 (0.28, 1.49)        | 3.78 (2.32, 6.14)          | 1.92 (0.97, 3.79)        |
| 4                            | 0.54 (0.28, 1.03)          | 0.76 (0.34, 1.66)        | 4.89 (2.93, 8.18)          | 2.29 (1.08, 4.86)        |
| 5                            | 0.67 (0.37, 1.22)          | 0.76 (0.33, 1.75)        | 8.63 (5.69, 13.1)          | 3.31 (1.64, 6.67)        |
| 6+                           | 0.48 (0.30, 0.74)          | 0.39 (0.17, 0.92)        | 5.92 (3.77, 9.28)          | 2.20 (1.05, 4.60)        |
| <b>Marital Status</b>        |                            |                          |                            |                          |
| Single (Reference)           | 1.00                       | 1.00                     | 1.00                       | 1.00                     |
| Married                      | 0.66 (0.46, 0.96)          | 0.90 (0.55, 1.50)        | 3.93 (2.98, 5.17)          | 1.66 (1.10, 2.51)        |
| Formerly Married             | 0.38 (0.22, 0.66)          | 0.45 (0.24, 0.86)        | 4.14 (2.77, 6.19)          | 1.57 (0.96, 2.55)        |
| <b>Residential Setting</b>   |                            |                          |                            |                          |
| Rural (Reference)            | 1.00                       | 1.00                     | 1.00                       | 1.00                     |
| Urban                        | 0.93 (0.67, 1.29)          | 1.21 (0.81, 1.81)        | 1.50 (1.20, 1.88)          | 1.15 (0.84, 1.56)        |

|                                   | UNDERWEIGHT       |                   | OVERWEIGHT/OBESITY |                   |
|-----------------------------------|-------------------|-------------------|--------------------|-------------------|
| <b>Region</b>                     |                   |                   |                    |                   |
| Montserrado (Reference)           | 1.00              | 1.00              | 1.00               | 1.00              |
| Bomi                              | 1.05 (0.52, 2.10) | 1.12 (0.47, 2.68) | 0.98 (0.67, 1.44)  | 1.67 (0.99, 2.83) |
| Bong                              | 1.31 (0.80, 2.15) | 1.47 (0.72, 3.00) | 0.47 (0.29, 0.73)  | 0.77 (0.41, 1.45) |
| Gbarpolu                          | 1.60 (0.91, 2.79) | 1.23 (0.59, 2.58) | 0.79 (0.48, 1.32)  | 1.38 (0.77, 2.46) |
| Grand Basa                        | 1.21 (0.66, 2.24) | 0.76 (0.34, 1.68) | 0.56 (0.41, 0.77)  | 1.13 (0.72, 1.78) |
| Grand Cape Mount                  | 0.48 (0.20, 1.17) | 0.35 (0.11, 1.19) | 0.96 (0.62, 1.46)  | 1.18 (0.65, 2.14) |
| Grand Gedeh                       | 0.70 (0.36, 1.37) | 0.95 (0.44, 2.06) | 0.62 (0.42, 0.93)  | 0.76 (0.31, 1.85) |
| Grand Kru                         | 0.43 (0.15, 1.25) | 0.21 (0.05, 0.88) | 0.71 (0.44, 1.14)  | 1.21 (0.50, 2.94) |
| Lofa                              | 0.99 (0.53, 1.83) | 0.88 (0.39, 2.02) | 0.35 (0.24, 0.51)  | 0.57 (0.32, 1.04) |
| Margibi                           | 1.31 (0.74, 2.32) | 1.14 (0.54, 2.41) | 0.72 (0.52, 0.98)  | 1.00 (0.66, 1.49) |
| Maryland                          | 0.70 (0.35, 1.38) | 0.40 (0.13, 1.21) | 0.66 (0.39, 1.11)  | 0.88 (0.35, 2.25) |
| Nimba                             | 0.87 (0.48, 1.59) | 0.70 (0.15, 3.21) | 0.44 (0.28, 0.69)  | 0.71 (0.28, 1.81) |
| River Cess                        | 0.93 (0.53, 1.64) | 0.41 (0.17, 0.98) | 0.41 (0.28, 0.61)  | 1.04 (0.56, 1.93) |
| River Gee                         | 0.83 (0.43, 1.61) | 0.60 (0.21, 1.73) | 0.63 (0.33, 1.22)  | 0.92 (0.35, 2.41) |
| Sinoe                             | 0.93 (0.45, 1.92) | 0.56 (0.20, 1.59) | 0.84 (0.53, 1.33)  | 1.06 (0.50, 2.25) |
| <b>Level of Education</b>         |                   |                   |                    |                   |
| No Education (Reference)          | 1.00              | 1.00              | 1.00               | 1.00              |
| Primary                           | 1.39 (0.95, 2.04) | 0.99 (0.64, 1.52) | 0.61 (0.49, 0.77)  | 1.04 (0.76, 1.44) |
| Secondary                         | 0.70 (0.40, 1.22) | 0.47 (0.23, 0.96) | 0.86 (0.66, 1.12)  | 1.13 (0.77, 1.67) |
| Higher                            | 0.37 (0.06, 2.43) | 0.28 (0.04, 2.00) | 2.15 (1.13, 4.06)  | 1.94 (0.90, 4.18) |
| <b>Wealth Quintile</b>            |                   |                   |                    |                   |
| Poorest (Reference)               | 1.00              | 1.00              | 1.00               | 1.00              |
| Poorer                            | 0.91 (0.64, 1.28) | 0.86 (0.58, 1.29) | 1.22 (0.93, 1.60)  | 1.27 (0.96, 1.70) |
| Middle                            | 0.63 (0.42, 0.93) | 0.57 (0.36, 0.90) | 1.38 (1.05, 1.82)  | 1.35 (0.98, 1.86) |
| Richer                            | 0.57 (0.33, 1.00) | 0.38 (0.21, 0.70) | 1.94 (1.35, 2.77)  | 1.94 (1.30, 2.89) |
| Richest                           | 0.92 (0.55, 1.56) | 0.54 (0.25, 1.19) | 2.51 (1.90, 3.31)  | 2.60 (1.50, 4.49) |
| <b>Occupation</b>                 |                   |                   |                    |                   |
| Not Working (Reference)           | 1.00              | 1.00              | 1.00               | 1.00              |
| Nonmanual                         | 0.67 (0.44, 1.01) | 0.95 (0.59, 1.52) | 2.24 (1.69, 2.97)  | 1.04 (0.73, 1.47) |
| Manual                            | 1.51 (0.68, 3.36) | 1.60 (0.82, 3.13) | 2.35 (1.39, 3.96)  | 1.24 (0.74, 2.08) |
| Agricultural                      | 1.04 (0.74, 1.46) | 0.97 (0.64, 1.48) | 0.88 (0.67, 1.16)  | 0.67 (0.49, 0.91) |
| Others                            | 1.47 (0.48, 4.46) | 1.00 (0.34, 3.00) | 0.77 (0.18, 3.20)  | 2.14 (0.57, 7.99) |
| <b>Media Exposure</b>             |                   |                   |                    |                   |
| Not Exposed (Reference)           | 1.00              | 1.00              | 1.00               | 1.00              |
| Exposed to one media source       | 1.31 (0.91, 1.89) | 1.50 (1.01, 2.20) | 1.45 (1.16, 1.80)  | 1.23 (0.95, 1.59) |
| Exposed to two media sources      | 1.03 (0.63, 1.68) | 1.31 (0.68, 2.52) | 1.78 (1.39, 2.27)  | 1.37 (0.99, 1.88) |
| Exposed to three media sources    | 1.15 (0.65, 2.04) | 1.67 (0.79, 3.55) | 1.66 (1.22, 2.27)  | 1.17 (0.67, 2.05) |
| <b>Hormonal Contraceptive Use</b> |                   |                   |                    |                   |
| No (Reference)                    | 1.00              | 1.00              | 1.00               | 1.00              |
| Yes                               | 0.52 (0.32, 0.84) | 0.71 (0.42, 1.20) | 1.13 (0.92, 1.39)  | 1.09 (0.84, 1.42) |

Overall Model Fit:  $F(114, 179) = 13.28, P=0.0000$ .

**Table S57:** Unadjusted and adjusted relative risk ratio, of underweight and overweight/obesity among women of child-bearing age in Benin.

| VARIABLES                  | UNDERWEIGHT                |                          | OVERWEIGHT/OBESITY         |                          |
|----------------------------|----------------------------|--------------------------|----------------------------|--------------------------|
|                            | Unadjusted<br>RRR (95% CI) | Adjusted<br>RRR (95% CI) | Unadjusted<br>RRR (95% CI) | Adjusted<br>RRR (95% CI) |
| <b>Age</b>                 |                            |                          |                            |                          |
| 15-19 (Reference)          | 1.00                       | 1.00                     | 1.00                       | 1.00                     |
| 20-24                      | 0.57 (0.46, 0.70)          | 0.68 (0.53, 0.86)        | 1.46 (1.21, 1.78)          | 1.37 (1.09, 1.73)        |
| 25-29                      | 0.32 (0.24, 0.41)          | 0.45 (0.32, 0.62)        | 2.24 (1.86, 2.70)          | 2.09 (1.62, 2.69)        |
| 30-34                      | 0.39 (0.31, 0.50)          | 0.58 (0.41, 0.82)        | 3.06 (2.55, 3.66)          | 3.03 (2.30, 3.98)        |
| 35-39                      | 0.39 (0.29, 0.51)          | 0.59 (0.39, 0.88)        | 4.27 (3.57, 5.10)          | 4.32 (3.27, 5.72)        |
| 40-44                      | 0.38 (0.28, 0.51)          | 0.56 (0.36, 0.86)        | 4.41 (3.68, 5.28)          | 4.74 (3.55, 6.33)        |
| 45-49                      | 0.41 (0.27, 0.60)          | 0.59 (0.36, 0.95)        | 4.81 (3.98, 5.81)          | 5.28 (3.93, 7.09)        |
| <b>Ethnicity</b>           |                            |                          |                            |                          |
| Fon (Reference)            | 1.00                       | 1.00                     | 1.00                       | 1.00                     |
| Adja                       | 0.92 (0.74, 1.15)          | 0.91 (0.60, 1.37)        | 0.83 (0.72, 0.96)          | 1.23 (0.97, 1.56)        |
| Bariba                     | 0.73 (0.50, 1.04)          | 1.38 (0.69, 2.73)        | 0.47 (0.39, 0.57)          | 0.72 (0.52, 1.00)        |
| Dendi                      | 0.66 (0.38, 1.14)          | 1.16 (0.59, 2.30)        | 0.72 (0.57, 0.91)          | 0.92 (0.67, 1.26)        |
| Yoa                        | 0.53 (0.32, 0.87)          | 1.35 (0.69, 2.67)        | 0.41 (0.32, 0.53)          | 0.84 (0.59, 1.21)        |
| Betamaribe                 | 1.04 (0.78, 1.38)          | 1.24 (0.60, 2.58)        | 0.21 (0.16, 0.28)          | 0.76 (0.53, 1.10)        |
| Peulh                      | 0.80 (0.49, 1.32)          | 1.56 (0.78, 3.10)        | 0.42 (0.31, 0.56)          | 0.70 (0.46, 1.04)        |
| Yoruba                     | 1.11 (0.85, 1.44)          | 1.11 (0.78, 1.56)        | 0.85 (0.72, 1.00)          | 0.79 (0.65, 0.95)        |
| Other Béninois             | 1.08 (0.29, 4.01)          | 1.96 (0.51, 7.50)        | 0.76 (0.31, 1.85)          | 0.95 (0.44, 2.03)        |
| Other Nationalities        | 1.07 (0.47, 2.43)          | 1.33 (0.55, 3.19)        | 1.54 (1.10, 2.15)          | 1.27 (0.90, 1.79)        |
| <b>Religion</b>            |                            |                          |                            |                          |
| Catholics (Reference)      | 1.00                       | 1.00                     | 1.00                       | 1.00                     |
| Other Christians           | 1.08 (0.86, 1.37)          | 1.12 (0.89, 1.41)        | 0.89 (0.78, 1.00)          | 0.95 (0.83, 1.09)        |
| Islam                      | 0.78 (0.60, 1.02)          | 0.92 (0.66, 1.29)        | 0.68 (0.60, 0.78)          | 1.24 (1.03, 1.50)        |
| Traditionalists            | 1.46 (1.14, 1.85)          | 1.76 (1.37, 2.27)        | 0.51 (0.43, 0.61)          | 0.77 (0.64, 0.94)        |
| Others                     | 0.97 (0.54, 1.73)          | 0.97 (0.55, 1.71)        | 0.94 (0.69, 1.28)          | 1.13 (0.80, 1.58)        |
| No Religion                | 1.07 (0.78, 1.48)          | 1.13 (0.82, 1.57)        | 0.51 (0.40, 0.64)          | 0.78 (0.61, 1.00)        |
| <b>Parity</b>              |                            |                          |                            |                          |
| 0 (Reference)              | 1.00                       | 1.00                     | 1.00                       | 1.00                     |
| 1                          | 0.64 (0.50, 0.82)          | 1.09 (0.79, 1.50)        | 1.51 (1.28, 1.79)          | 1.14 (0.87, 1.50)        |
| 2                          | 0.53 (0.42, 0.67)          | 1.08 (0.75, 1.57)        | 1.90 (1.63, 2.23)          | 1.10 (0.84, 1.45)        |
| 3                          | 0.39 (0.30, 0.52)          | 0.86 (0.57, 1.28)        | 2.14 (1.84, 2.49)          | 1.19 (0.89, 1.58)        |
| 4                          | 0.41 (0.30, 0.54)          | 0.89 (0.57, 1.37)        | 2.52 (2.15, 2.95)          | 1.29 (0.97, 1.73)        |
| 5                          | 0.44 (0.32, 0.61)          | 0.96 (0.62, 1.49)        | 2.12 (1.78, 2.53)          | 1.10 (0.82, 1.49)        |
| 6+                         | 0.45 (0.35, 0.58)          | 0.97 (0.63, 1.51)        | 2.09 (1.79, 2.43)          | 1.09 (0.81, 1.47)        |
| <b>Marital Status</b>      |                            |                          |                            |                          |
| Single (Reference)         | 1.00                       | 1.00                     | 1.00                       | 1.00                     |
| Married                    | 0.47 (0.40, 0.55)          | 0.77 (0.56, 1.05)        | 1.97 (1.74, 2.23)          | 0.96 (0.73, 1.28)        |
| Formerly Married           | 0.37 (0.23, 0.60)          | 0.57 (0.32, 1.01)        | 2.54 (2.08, 3.12)          | 0.88 (0.63, 1.23)        |
| <b>Residential Setting</b> |                            |                          |                            |                          |
| Rural (Reference)          | 1.00                       | 1.00                     | 1.00                       | 1.00                     |
| Urban                      | 1.03 (0.86, 1.23)          | 1.08 (0.88, 1.34)        | 1.92 (1.73, 2.13)          | 1.26 (1.12, 1.43)        |



|                                   | UNDERWEIGHT       |                   | OVERWEIGHT/OBESITY |                   |
|-----------------------------------|-------------------|-------------------|--------------------|-------------------|
| <b>Region</b>                     |                   |                   |                    |                   |
| Ouémé (Reference)                 | 1.00              | 1.00              | 1.00               | 1.00              |
| Alibori                           | 0.73 (0.43, 1.24) | 0.66 (0.33, 1.32) | 0.45 (0.36, 0.56)  | 0.69 (0.49, 0.98) |
| Atacora                           | 0.99 (0.69, 1.43) | 0.71 (0.32, 1.57) | 0.20 (0.16, 0.25)  | 0.35 (0.25, 0.49) |
| Atlantique                        | 1.15 (0.82, 1.62) | 1.06 (0.75, 1.48) | 0.84 (0.69, 1.01)  | 0.89 (0.71, 1.10) |
| Borgou                            | 0.56 (0.37, 0.86) | 0.45 (0.25, 0.82) | 0.56 (0.45, 0.69)  | 0.71 (0.52, 0.97) |
| Collines                          | 0.93 (0.64, 1.35) | 0.94 (0.61, 1.45) | 0.79 (0.64, 0.96)  | 1.14 (0.90, 1.43) |
| Couffo                            | 0.72 (0.49, 1.05) | 0.65 (0.38, 1.13) | 0.33 (0.25, 0.44)  | 0.41 (0.29, 0.60) |
| Donga                             | 0.38 (0.24, 0.61) | 0.35 (0.19, 0.65) | 0.30 (0.23, 0.38)  | 0.33 (0.23, 0.47) |
| Littoral                          | 0.73 (0.48, 1.10) | 0.57 (0.37, 0.89) | 1.38 (1.14, 1.66)  | 1.01 (0.81, 1.26) |
| Mono                              | 1.21 (0.83, 1.76) | 1.08 (0.63, 1.88) | 0.96 (0.79, 1.17)  | 1.05 (0.77, 1.44) |
| Pateau                            | 1.38 (0.96, 1.98) | 1.35 (0.90, 2.05) | 0.72 (0.55, 0.95)  | 1.03 (0.76, 1.40) |
| Zou                               | 1.08 (0.80, 1.46) | 0.95 (0.69, 1.31) | 0.74 (0.61, 0.90)  | 0.92 (0.74, 1.13) |
| <b>Level of Education</b>         |                   |                   |                    |                   |
| No Education (Reference)          | 1.00              | 1.00              | 1.00               | 1.00              |
| Primary                           | 1.26 (1.01, 1.57) | 1.10 (0.86, 1.42) | 1.62 (1.45, 1.81)  | 1.26 (1.10, 1.43) |
| Secondary                         | 1.62 (1.34, 1.95) | 1.11 (0.85, 1.46) | 1.07 (0.95, 1.20)  | 1.06 (0.90, 1.25) |
| Higher                            | 0.88 (0.42, 1.85) | 0.90 (0.40, 2.03) | 1.66 (1.20, 2.28)  | 0.92 (0.64, 1.33) |
| <b>Wealth Quintile</b>            |                   |                   |                    |                   |
| Poorest (Reference)               | 1.00              | 1.00              | 1.00               | 1.00              |
| Poorer                            | 0.82 (0.64, 1.05) | 0.85 (0.66, 1.09) | 1.40 (1.18, 1.67)  | 1.36 (1.15, 1.62) |
| Middle                            | 0.72 (0.55, 0.94) | 0.70 (0.53, 0.93) | 1.86 (1.57, 2.19)  | 1.63 (1.37, 1.95) |
| Richer                            | 0.80 (0.61, 1.04) | 0.79 (0.58, 1.07) | 2.78 (2.36, 3.28)  | 2.04 (1.70, 2.45) |
| Richest                           | 0.96 (0.73, 1.27) | 1.04 (0.72, 1.49) | 3.72 (3.16, 4.37)  | 2.40 (1.94, 2.98) |
| <b>Occupation</b>                 |                   |                   |                    |                   |
| Not Working (Reference)           | 1.00              | 1.00              | 1.00               | 1.00              |
| Nonmanual                         | 0.54 (0.45, 0.65) | 0.78 (0.63, 0.97) | 2.06 (1.85, 2.28)  | 1.23 (1.09, 1.38) |
| Manual                            | 0.96 (0.73, 1.28) | 1.14 (0.84, 1.54) | 1.24 (1.01, 1.51)  | 0.90 (0.73, 1.12) |
| Agricultural                      | 0.64 (0.50, 0.81) | 0.81 (0.63, 1.05) | 0.88 (0.75, 1.03)  | 0.96 (0.81, 1.13) |
| Others                            | 0.60 (0.39, 0.92) | 0.85 (0.54, 1.35) | 2.17 (1.75, 2.69)  | 1.15 (0.92, 1.43) |
| <b>Media Exposure</b>             |                   |                   |                    |                   |
| Not Exposed (Reference)           | 1.00              | 1.00              | 1.00               | 1.00              |
| Exposed to one media source       | 0.84 (0.66, 1.07) | 0.82 (0.64, 1.07) | 1.04 (0.92, 1.18)  | 0.82 (0.72, 0.94) |
| Exposed to two media sources      | 0.87 (0.71, 1.06) | 0.80 (0.63, 1.02) | 1.66 (1.48, 1.87)  | 0.93 (0.81, 1.06) |
| Exposed to three media sources    | 1.23 (0.93, 1.64) | 0.84 (0.60, 1.19) | 1.42 (1.23, 1.65)  | 0.88 (0.72, 1.08) |
| <b>Hormonal Contraceptive Use</b> |                   |                   |                    |                   |
| No (Reference)                    | 1.00              | 1.00              | 1.00               | 1.00              |
| Yes                               | 0.58 (0.37, 0.92) | 0.80 (0.50, 1.29) | 1.65 (1.36, 2.00)  | 1.19 (0.95, 1.48) |

Overall Model Fit:  $F(110, 506) = 13.85, P=0.0000$ .

**Table S58:** Unadjusted and adjusted relative risk ratio, of underweight and overweight/obesity among women of child-bearing age in Kenya.

| VARIABLES                  | UNDERWEIGHT             |                       | OVERWEIGHT/OBESITY      |                       |
|----------------------------|-------------------------|-----------------------|-------------------------|-----------------------|
|                            | Unadjusted RRR (95% CI) | Adjusted RRR (95% CI) | Unadjusted RRR (95% CI) | Adjusted RRR (95% CI) |
| <b>Age</b>                 |                         |                       |                         |                       |
| 15-19 (Reference)          | 1.00                    | 1.00                  | 1.00                    | 1.00                  |
| 20-24                      | 0.59 (0.47, 0.75)       | 0.83 (0.63, 1.09)     | 1.82 (1.43, 2.32)       | 1.08 (0.80, 1.46)     |
| 25-29                      | 0.58 (0.46, 0.73)       | 0.93 (0.66, 1.32)     | 3.51 (2.78, 4.42)       | 1.73 (1.25, 2.39)     |
| 30-34                      | 0.42 (0.32, 0.55)       | 0.67 (0.45, 1.00)     | 5.21 (4.11, 6.60)       | 2.63 (1.82, 3.79)     |
| 35-39                      | 0.55 (0.42, 0.71)       | 0.79 (0.53, 1.18)     | 4.83 (3.85, 6.06)       | 2.85 (1.97, 4.14)     |
| 40-44                      | 0.50 (0.37, 0.68)       | 0.70 (0.44, 1.10)     | 5.93 (4.70, 7.48)       | 3.82 (2.66, 5.49)     |
| 45-49                      | 0.63 (0.46, 0.86)       | 0.84 (0.52, 1.34)     | 6.18 (4.80, 7.94)       | 4.35 (2.97, 6.37)     |
| <b>Ethnicity</b>           |                         |                       |                         |                       |
| Kikuyu (Reference)         | 1.00                    | 1.00                  | 1.00                    | 1.00                  |
| Embu                       | 0.93 (0.39, 2.21)       | 1.06 (0.44, 2.57)     | 0.46 (0.28, 0.75)       | 0.50 (0.29, 0.86)     |
| Kalenjin                   | 1.45 (1.07, 1.96)       | 1.10 (0.71, 1.70)     | 0.26 (0.22, 0.31)       | 0.42 (0.33, 0.54)     |
| Kamba                      | 1.28 (0.91, 1.81)       | 1.24 (0.70, 2.20)     | 0.54 (0.44, 0.67)       | 0.68 (0.48, 0.96)     |
| Kisii                      | 0.55 (0.32, 0.95)       | 0.54 (0.26, 1.12)     | 0.49 (0.40, 0.60)       | 0.75 (0.54, 1.04)     |
| Luhya                      | 0.85 (0.61, 1.18)       | 0.63 (0.36, 1.12)     | 0.44 (0.35, 0.55)       | 0.77 (0.58, 1.02)     |
| Luo                        | 0.84 (0.60, 1.16)       | 0.79 (0.45, 1.37)     | 0.35 (0.29, 0.43)       | 0.58 (0.42, 0.80)     |
| Maasai                     | 4.04 (2.80, 5.83)       | 2.34 (1.40, 3.91)     | 0.37 (0.25, 0.56)       | 0.76 (0.47, 1.22)     |
| Meru                       | 1.22 (0.80, 1.86)       | 1.23 (0.64, 2.35)     | 0.40 (0.31, 0.53)       | 0.47 (0.31, 0.71)     |
| Mijikenda/Swahili          | 1.48 (1.03, 2.12)       | 0.51 (0.28, 0.91)     | 0.33 (0.25, 0.42)       | 0.56 (0.38, 0.84)     |
| Somali                     | 4.80 (3.39, 6.78)       | 1.22 (0.45, 3.31)     | 0.42 (0.30, 0.60)       | 1.27 (0.58, 2.79)     |
| Taita/Taveta               | 0.76 (0.32, 1.79)       | 0.55 (0.20, 1.46)     | 1.06 (0.73, 1.54)       | 0.90 (0.56, 1.45)     |
| Turkana                    | 7.05 (4.85, 10.2)       | 2.95 (1.75, 4.99)     | 0.09 (0.05, 0.20)       | 0.22 (0.10, 0.48)     |
| Samburu                    | 6.66 (4.19, 10.6)       | 3.18 (1.86, 5.43)     | 0.06 (0.02, 0.13)       | 0.10 (0.04, 0.26)     |
| Other                      | 1.94 (1.32, 2.84)       | 0.85 (0.48, 1.51)     | 0.39 (0.29, 0.53)       | 0.72 (0.47, 1.09)     |
| <b>Religion</b>            |                         |                       |                         |                       |
| Catholics (Reference)      | 1.00                    | 1.00                  | 1.00                    | 1.00                  |
| Other Christians           | 0.81 (0.66, 0.98)       | 0.89 (0.72, 1.09)     | 0.93 (0.80, 1.08)       | 0.94 (0.82, 1.09)     |
| Islam                      | 2.35 (1.81, 3.03)       | 1.70 (1.11, 2.59)     | 0.90 (0.72, 1.13)       | 1.19 (0.84, 1.67)     |
| Others                     | 1.38 (0.42, 4.54)       | 1.41 (0.51, 3.94)     | 1.06 (0.54, 2.10)       | 0.65 (0.36, 1.18)     |
| No Religion                | 1.46 (0.94, 2.27)       | 1.19 (0.75, 1.89)     | 0.36 (0.23, 0.55)       | 0.62 (0.38, 1.02)     |
| <b>Parity</b>              |                         |                       |                         |                       |
| 0 (Reference)              | 1.00                    | 1.00                  | 1.00                    | 1.00                  |
| 1                          | 0.59 (0.45, 0.77)       | 0.93 (0.67, 1.28)     | 2.22 (1.83, 2.68)       | 1.23 (0.93, 1.63)     |
| 2                          | 0.54 (0.42, 0.71)       | 0.90 (0.63, 1.28)     | 3.48 (2.92, 4.16)       | 1.57 (1.16, 2.13)     |
| 3                          | 0.65 (0.50, 0.86)       | 0.98 (0.66, 1.45)     | 3.64 (2.97, 4.45)       | 1.54 (1.11, 2.14)     |
| 4                          | 0.66 (0.50, 0.87)       | 0.85 (0.57, 1.28)     | 3.15 (2.57, 3.86)       | 1.40 (0.98, 1.98)     |
| 5                          | 0.67 (0.50, 0.91)       | 0.99 (0.63, 1.56)     | 3.01 (2.42, 3.74)       | 1.38 (0.95, 2.00)     |
| 6+                         | 0.74 (0.59, 0.93)       | 0.81 (0.53, 1.25)     | 1.99 (1.66, 2.38)       | 1.09 (0.76, 1.57)     |
| <b>Marital Status</b>      |                         |                       |                         |                       |
| Single (Reference)         | 1.00                    | 1.00                  | 1.00                    | 1.00                  |
| Married                    | 0.65 (0.56, 0.76)       | 0.74 (0.57, 0.96)     | 2.74 (2.39, 3.14)       | 1.42 (1.13, 1.79)     |
| Formerly Married           | 0.66 (0.51, 0.86)       | 0.78 (0.55, 1.12)     | 2.59 (2.14, 3.15)       | 1.16 (0.88, 1.54)     |
| <b>Residential Setting</b> |                         |                       |                         |                       |
| Rural (Reference)          | 1.00                    | 1.00                  | 1.00                    | 1.00                  |
| Urban                      | 0.60 (0.50, 0.72)       | 1.03 (0.84, 1.27)     | 2.06 (1.82, 2.34)       | 1.13 (0.98, 1.31)     |

|                                   | UNDERWEIGHT       |                   | OVERWEIGHT/OBESITY |                   |
|-----------------------------------|-------------------|-------------------|--------------------|-------------------|
| <b>Region</b>                     |                   |                   |                    |                   |
| Nairobi (Reference)               | 1.00              | 1.00              | 1.00               | 1.00              |
| Coast                             | 3.53 (1.97, 6.31) | 2.08 (1.10, 3.95) | 0.61 (0.45, 0.82)  | 1.27 (0.86, 1.88) |
| North Eastern                     | 10.1 (5.56, 18.4) | 1.24 (0.44, 3.53) | 0.39 (0.25, 0.59)  | 0.69 (0.33, 1.45) |
| Eastern                           | 2.98 (1.67, 5.30) | 1.40 (0.75, 2.62) | 0.54 (0.40, 0.71)  | 1.17 (0.79, 1.74) |
| Central                           | 2.43 (1.33, 4.44) | 1.95 (0.96, 3.96) | 1.08 (0.82, 1.42)  | 1.10 (0.80, 1.52) |
| Rift Valley                       | 3.58 (2.04, 6.29) | 1.59 (0.85, 2.95) | 0.50 (0.39, 0.66)  | 1.15 (0.85, 1.55) |
| Western                           | 2.31 (1.27, 4.20) | 1.94 (0.96, 3.92) | 0.39 (0.26, 0.57)  | 0.85 (0.55, 1.32) |
| Nyanza                            | 1.67 (0.93, 3.01) | 1.37 (0.71, 2.65) | 0.42 (0.32, 0.56)  | 0.93 (0.65, 1.33) |
| <b>Level of Education</b>         |                   |                   |                    |                   |
| No Education (Reference)          | 1.00              | 1.00              | 1.00               | 1.00              |
| Primary                           | 0.34 (0.28, 0.42) | 0.82 (0.63, 1.07) | 1.60 (1.24, 2.05)  | 1.18 (0.85, 1.63) |
| Secondary                         | 0.25 (0.20, 0.31) | 0.64 (0.46, 0.89) | 1.93 (1.50, 2.49)  | 1.29 (0.91, 1.81) |
| Higher                            | 0.24 (0.16, 0.36) | 0.86 (0.54, 1.38) | 2.96 (2.20, 3.99)  | 1.27 (0.86, 1.87) |
| <b>Wealth Quintile</b>            |                   |                   |                    |                   |
| Poorest (Reference)               | 1.00              | 1.00              | 1.00               | 1.00              |
| Poorer                            | 0.52 (0.43, 0.63) | 0.86 (0.69, 1.08) | 1.70 (1.39, 2.07)  | 1.50 (1.21, 1.87) |
| Middle                            | 0.37 (0.30, 0.46) | 0.63 (0.50, 0.80) | 2.29 (1.89, 2.78)  | 1.83 (1.47, 2.28) |
| Richer                            | 0.30 (0.23, 0.39) | 0.58 (0.43, 0.78) | 4.12 (3.39, 5.00)  | 2.82 (2.24, 3.56) |
| Richest                           | 0.28 (0.21, 0.37) | 0.55 (0.39, 0.77) | 5.92 (4.88, 7.19)  | 3.75 (2.88, 4.89) |
| <b>Occupation</b>                 |                   |                   |                    |                   |
| Not Working (Reference)           | 1.00              | 1.00              | 1.00               | 1.00              |
| Nonmanual                         | 0.41 (0.33, 0.50) | 0.67 (0.53, 0.84) | 2.62 (2.27, 3.01)  | 1.25 (1.04, 1.50) |
| Manual                            | 0.38 (0.27, 0.52) | 0.54 (0.39, 0.75) | 1.71 (1.37, 2.14)  | 1.05 (0.81, 1.37) |
| Agricultural                      | 0.55 (0.45, 0.66) | 0.78 (0.63, 0.98) | 1.63 (1.40, 1.89)  | 1.00 (0.82, 1.22) |
| <b>Media Exposure</b>             |                   |                   |                    |                   |
| Not Exposed (Reference)           | 1.00              | 1.00              | 1.00               | 1.00              |
| Exposed to one media source       | 0.47 (0.39, 0.57) | 0.73 (0.59, 0.90) | 1.70 (1.40, 2.06)  | 1.26 (1.02, 1.55) |
| Exposed to two media sources      | 0.34 (0.28, 0.42) | 0.61 (0.48, 0.78) | 2.31 (1.91, 2.79)  | 1.21 (0.97, 1.50) |
| Exposed to three media sources    | 0.32 (0.25, 0.41) | 0.58 (0.42, 0.80) | 3.12 (2.53, 3.84)  | 1.56 (1.22, 1.99) |
| <b>Hormonal Contraceptive Use</b> |                   |                   |                    |                   |
| No (Reference)                    | 1.00              | 1.00              | 1.00               | 1.00              |
| Yes                               | 0.44 (0.36, 0.54) | 0.70 (0.56, 0.87) | 1.55 (1.39, 1.73)  | 1.14 (1.00, 1.31) |

Overall Model Fit:  $F(108, 1393) = 16.96, P=0.0000$ .

**Table S59:** Unadjusted and adjusted relative risk ratio, of underweight and overweight/obesity among women of child-bearing age in Sao Tome and Principe.

| VARIABLES                      | UNDERWEIGHT                |                          | OVERWEIGHT/OBESITY         |                          |
|--------------------------------|----------------------------|--------------------------|----------------------------|--------------------------|
|                                | Unadjusted<br>RRR (95% CI) | Adjusted<br>RRR (95% CI) | Unadjusted<br>RRR (95% CI) | Adjusted<br>RRR (95% CI) |
| <b>Age</b>                     |                            |                          |                            |                          |
| 15-19 (Reference)              | 1.00                       | 1.00                     | 1.00                       | 1.00                     |
| 20-24                          | 0.99 (0.63, 1.55)          | 1.36 (0.73, 2.55)        | 1.98 (1.30, 3.04)          | 1.35 (0.78, 2.33)        |
| 25-29                          | 0.42 (0.19, 0.92)          | 0.52 (0.15, 1.78)        | 3.03 (1.88, 4.89)          | 1.64 (0.92, 2.94)        |
| 30-34                          | 0.36 (0.17, 0.76)          | 0.45 (0.12, 1.69)        | 4.31 (2.69, 6.90)          | 2.14 (1.12, 4.11)        |
| 35-39                          | 0.53 (0.22, 1.29)          | 0.63 (0.15, 2.65)        | 6.37 (3.96, 10.24)         | 3.17 (1.62, 6.20)        |
| 40-44                          | 0.27 (0.11, 0.65)          | 0.32 (0.08, 1.24)        | 5.29 (3.15, 8.89)          | 2.65 (1.27, 5.52)        |
| 45-49                          | 0.63 (0.24, 1.70)          | 0.60 (0.23, 1.59)        | 7.17 (4.79, 10.75)         | 3.70 (1.86, 7.34)        |
| <b>Religion</b>                |                            |                          |                            |                          |
| Catholics (Reference)          | 1.00                       | 1.00                     | 1.00                       | 1.00                     |
| Other Christians               | 0.43 (0.20, 0.95)          | 0.35 (0.15, 0.80)        | 0.86 (0.62, 1.20)          | 1.12 (0.76, 1.64)        |
| Others                         | 0.17 (0.03, 0.88)          | 0.14 (0.02, 0.77)        | 1.08 (0.62, 1.88)          | 1.19 (0.68, 2.09)        |
| None                           | 0.69 (0.37, 1.29)          | 0.57 (0.30, 1.08)        | 0.61 (0.37, 0.99)          | 0.76 (0.45, 1.29)        |
| <b>Parity</b>                  |                            |                          |                            |                          |
| 0 (Reference)                  | 1.00                       | 1.00                     | 1.00                       | 1.00                     |
| 1                              | 0.58 (0.30, 1.14)          | 0.92 (0.40, 2.09)        | 2.73 (1.59, 4.71)          | 0.84 (0.36, 1.96)        |
| 2                              | 0.42 (0.21, 0.81)          | 0.79 (0.23, 2.73)        | 2.43 (1.52, 3.90)          | 0.55 (0.21, 1.42)        |
| 3                              | 0.42 (0.20, 0.90)          | 1.15 (0.32, 4.12)        | 3.36 (2.09, 5.41)          | 0.66 (0.26, 1.64)        |
| 4                              | 0.47(0.19, 1.17)           | 1.30 (0.27, 6.29)        | 4.74 (2.92, 7.68)          | 0.86 (0.32, 2.33)        |
| 5                              | 0.36(0.14, 0.91)           | 1.11 (0.27, 4.53)        | 5.33 (3.34, 8.50)          | 0.83 (0.31, 2.24)        |
| 6+                             | 0.31 (0.12, 0.75)          | 0.91 (0.24, 3.50)        | 4.16 (2.64, 6.54)          | 0.63 (0.23, 1.72)        |
| <b>Marital Status</b>          |                            |                          |                            |                          |
| Single (Reference)             | 1.00                       | 1.00                     | 1.00                       | 1.00                     |
| Married                        | 0.40 (0.25, 0.62)          | 0.59 (0.24, 1.48)        | 4.46 (3.13, 6.36)          | 3.57 (1.78, 7.18)        |
| Formerly Married               | 0.55 (0.29, 1.04)          | 0.71 (0.25, 2.04)        | 3.04 (1.98, 4.66)          | 2.26 (1.21, 4.21)        |
| <b>Residential Setting</b>     |                            |                          |                            |                          |
| Rural (Reference)              | 1.00                       | 1.00                     | 1.00                       | 1.00                     |
| Urban                          | 1.77 (1.02, 3.06)          | 1.33 (0.82, 2.14)        | 1.36 (1.09, 1.70)          | 1.36 (1.03, 1.79)        |
| <b>Region</b>                  |                            |                          |                            |                          |
| Região Centro (Reference)      | 1.00                       | 1.00                     | 1.00                       | 1.00                     |
| Região Sul                     | 0.73 (0.42, 1.26)          | 0.89 (0.51, 1.57)        | 0.89 (0.68, 1.16)          | 1.22 (0.84, 1.76)        |
| Região Norte                   | 0.54 (0.27, 1.09)          | 0.65 (0.33, 1.28)        | 0.79 (0.60, 1.03)          | 1.04 (0.75, 1.45)        |
| Região do Príncipe             | 0.93 (0.43, 2.02)          | 1.22 (0.51, 2.89)        | 1.01 (0.77, 1.33)          | 1.33 (0.88, 2.01)        |
| <b>Level of Education</b>      |                            |                          |                            |                          |
| No Education (Reference)       | 1.00                       | 1.00                     | 1.00                       | 1.00                     |
| Primary                        | 1.21 (0.51, 2.87)          | 1.01 (0.38, 2.67)        | 1.32 (0.80, 2.17)          | 1.38 (0.89, 2.13)        |
| Secondary                      | 1.42 (0.55, 3.68)          | 0.49 (0.16, 1.58)        | 0.93 (0.57, 1.51)          | 1.15 (0.70, 1.90)        |
| <b>Wealth Quintile</b>         |                            |                          |                            |                          |
| Poorest (Reference)            | 1.00                       | 1.00                     | 1.00                       | 1.00                     |
| Poorer                         | 0.72 (0.33, 1.57)          | 0.66 (0.29, 1.50)        | 1.07 (0.71, 1.59)          | 1.03 (0.69, 1.55)        |
| Middle                         | 0.79 (0.43, 1.46)          | 0.66 (0.33, 1.32)        | 1.21 (0.79, 1.85)          | 1.19 (0.76, 1.87)        |
| Richer                         | 0.54 (0.28, 1.03)          | 0.42 (0.20, 0.89)        | 1.77 (1.20, 2.61)          | 1.89 (1.25, 2.84)        |
| Richest                        | 1.65 (0.89, 3.06)          | 1.21 (0.56, 2.62)        | 1.81 (1.28, 2.56)          | 2.03 (1.39, 2.98)        |
| <b>Occupation</b>              |                            |                          |                            |                          |
| Not Working (Reference)        | 1.00                       | 1.00                     | 1.00                       | 1.00                     |
| Nonmanual                      | 0.96 (0.70, 1.31)          | 1.22 (0.80, 1.84)        | 2.26 (1.80, 2.83)          | 1.46 (1.13, 1.89)        |
| Manual                         | 0.54 (0.21, 1.40)          | 0.71 (0.25, 1.99)        | 2.06 (1.29, 3.28)          | 1.20 (0.73, 2.00)        |
| <b>Media Exposure</b>          |                            |                          |                            |                          |
| Not Exposed (Reference)        | 1.00                       | 1.00                     | 1.00                       | 1.00                     |
| Exposed to one media source    | 0.39 (0.09, 1.71)          | 0.38 (0.08, 1.89)        | 1.31 (0.60, 2.87)          | 1.51 (0.67, 3.44)        |
| Exposed to two media sources   | 0.97 (0.28, 3.33)          | 0.92 (0.25, 3.52)        | 1.33 (0.74, 2.39)          | 1.40 (0.75, 2.63)        |
| Exposed to three media sources | 1.34 (0.40, 4.55)          | 1.10 (0.28, 4.31)        | 1.32 (0.77, 2.28)          | 1.36 (0.73, 2.54)        |

|                                   | UNDERWEIGHT       |                   | OVERWEIGHT/OBESITY |                   |
|-----------------------------------|-------------------|-------------------|--------------------|-------------------|
| <b>Hormonal Contraceptive Use</b> |                   |                   |                    |                   |
| No (Reference)                    | 1.00              | 1.00              | 1.00               | 1.00              |
| Yes                               | 0.42 (0.21, 0.86) | 0.63 (0.31, 1.28) | 1.10 (0.82, 1.48)  | 0.87 (0.64, 1.18) |

Overall Model Fit: F (66, 21) = 8.15, P=0.0000.

**Table S60:** Unadjusted and adjusted relative risk ratio, of underweight and overweight/obesity among women of child-bearing age in Togo.

| VARIABLES | UNDERWEIGHT                |                          | OVERWEIGHT/OBESITY         |                          |
|-----------|----------------------------|--------------------------|----------------------------|--------------------------|
|           | Unadjusted<br>RRR (95% CI) | Adjusted<br>RRR (95% CI) | Unadjusted<br>RRR (95% CI) | Adjusted<br>RRR (95% CI) |

|                                          | UNDERWEIGHT       |                   | OVERWEIGHT/OBESITY |                   |
|------------------------------------------|-------------------|-------------------|--------------------|-------------------|
| <b>Age</b>                               |                   |                   |                    |                   |
| 15-19 (Reference)                        | 1.00              | 1.00              | 1.00               | 1.00              |
| 20-24                                    | 0.58 (0.40, 0.85) | 0.94 (0.60, 1.48) | 1.83 (1.33, 2.51)  | 1.29 (0.93, 1.81) |
| 25-29                                    | 0.55 (0.35, 0.86) | 1.13 (0.59, 2.16) | 3.35 (2.48, 4.52)  | 2.17 (1.46, 3.24) |
| 30-34                                    | 0.62 (0.39, 0.97) | 1.41 (0.67, 2.97) | 4.96 (3.63, 6.78)  | 3.56 (2.32, 5.47) |
| 35-39                                    | 0.76 (0.47, 1.22) | 1.94 (0.91, 4.12) | 6.31 (4.70, 8.46)  | 5.20 (3.38, 8.00) |
| 40-44                                    | 0.77 (0.49, 1.23) | 1.98 (0.85, 4.62) | 7.36 (5.34, 10.2)  | 6.71 (4.30, 10.5) |
| 45-49                                    | 0.82 (0.50, 1.34) | 2.12 (0.93, 4.82) | 6.35 (4.55, 8.84)  | 6.87 (4.25, 11.1) |
| <b>Ethnicity</b>                         |                   |                   |                    |                   |
| Adja-Ewé/Mina (Reference)                | 1.00              | 1.00              | 1.00               | 1.00              |
| Kabye/Tem                                | 0.68 (0.49, 0.95) | 0.55 (0.34, 0.90) | 0.70 (0.56, 0.86)  | 0.93 (0.71, 1.22) |
| Akposso/Akebou                           | 0.36 (0.12, 1.05) | 0.39 (0.12, 1.27) | 0.89 (0.60, 1.33)  | 1.34 (0.89, 2.01) |
| Ana-Ife                                  | 0.82 (0.23, 2.87) | 0.92 (0.25, 3.38) | 0.77 (0.52, 1.15)  | 1.21 (0.77, 1.92) |
| Para-Gourma/Akan                         | 1.35 (1.01, 1.79) | 0.67 (0.39, 1.17) | 0.33 (0.25, 0.45)  | 0.70 (0.44, 1.11) |
| Other Togolese                           | 1.31 (0.61, 2.83) | 1.04 (0.34, 3.16) | 0.31 (0.15, 0.65)  | 0.40 (0.16, 0.95) |
| Stranger                                 | 0.95 (0.50, 1.80) | 1.21 (0.59, 2.48) | 1.98 (1.45, 2.72)  | 1.66 (1.17, 2.36) |
| <b>Religion</b>                          |                   |                   |                    |                   |
| Other Christians (Reference)             | 1.00              | 1.00              | 1.00               | 1.00              |
| Islam                                    | 0.92 (0.64, 1.31) | 0.89 (0.57, 1.41) | 1.12 (0.91, 1.38)  | 1.61 (1.22, 2.12) |
| Traditionalists                          | 1.66 (1.23, 2.23) | 1.32 (0.91, 1.91) | 0.35 (0.27, 0.47)  | 0.68 (0.48, 0.96) |
| No Religion                              | 1.05 (0.69, 1.60) | 0.87 (0.56, 1.35) | 0.61 (0.45, 0.81)  | 0.99 (0.70, 1.39) |
| <b>Parity</b>                            |                   |                   |                    |                   |
| 0 (Reference)                            | 1.00              | 1.00              | 1.00               | 1.00              |
| 1                                        | 0.61 (0.40, 0.95) | 0.88 (0.49, 1.57) | 1.66 (1.28, 2.17)  | 0.75 (0.51, 1.10) |
| 2                                        | 0.56 (0.35, 0.92) | 0.82 (0.41, 1.63) | 2.85 (2.15, 3.77)  | 0.86 (0.57, 1.30) |
| 3                                        | 0.66 (0.40, 1.07) | 0.82 (0.39, 1.71) | 3.00 (2.31, 3.90)  | 0.86 (0.55, 1.37) |
| 4                                        | 0.67 (0.38, 1.16) | 0.78 (0.35, 1.76) | 2.91 (2.21, 3.85)  | 0.77 (0.47, 1.26) |
| 5                                        | 0.92 (0.54, 1.59) | 0.87 (0.38, 2.02) | 2.57 (1.86, 3.57)  | 0.92 (0.55, 1.53) |
| 6+                                       | 0.80 (0.56, 1.15) | 0.58 (0.26, 1.33) | 1.84 (1.42, 2.38)  | 0.77 (0.48, 1.24) |
| <b>Marital Status</b>                    |                   |                   |                    |                   |
| Single (Reference)                       | 1.00              | 1.00              | 1.00               | 1.00              |
| Married                                  | 0.73 (0.56, 0.95) | 0.73 (0.41, 1.30) | 2.87 (2.35, 3.49)  | 2.03 (1.35, 3.06) |
| Formerly Married                         | 0.45 (0.24, 0.86) | 0.40 (0.16, 0.99) | 3.76 (2.71, 5.20)  | 2.01 (1.22, 3.32) |
| <b>Residential Setting</b>               |                   |                   |                    |                   |
| Rural (Reference)                        | 1.00              | 1.00              | 1.00               | 1.00              |
| Urban                                    | 0.71 (0.52, 0.97) | 1.73 (0.87, 3.42) | 2.80 (2.37, 3.31)  | 0.94 (0.64, 1.39) |
| <b>Region</b>                            |                   |                   |                    |                   |
| Grande Agglomération de Lomé (Reference) | 1.00              | 1.00              | 1.00               | 1.00              |
| Maritime (Sans Agglomération de Lomé)    | 1.82 (1.16, 2.86) | 1.47 (0.71, 3.05) | 0.56 (0.43, 0.74)  | 0.99 (0.70, 1.39) |
| Plateaux                                 | 0.87 (0.53, 1.44) | 0.82 (0.40, 1.68) | 0.42 (0.33, 0.52)  | 0.72 (0.52, 1.01) |
| Centrale                                 | 0.97 (0.58, 1.60) | 1.31 (0.61, 2.84) | 0.45 (0.36, 0.57)  | 0.70 (0.49, 0.98) |
| Kara                                     | 1.65 (1.04, 2.63) | 1.82 (0.88, 3.78) | 0.28 (0.21, 0.37)  | 0.59 (0.40, 0.87) |
| Savanes                                  | 2.23 (1.46, 3.39) | 2.15 (1.00, 4.66) | 0.14 (0.09, 0.20)  | 0.46 (0.25, 0.81) |
| <b>Level of Education</b>                |                   |                   |                    |                   |
| No Education (Reference)                 | 1.00              | 1.00              | 1.00               | 1.00              |
| Primary                                  | 0.92 (0.67, 1.25) | 1.27 (0.89, 1.83) | 1.59 (1.31, 1.93)  | 1.38 (1.11, 1.71) |
| Secondary                                | 0.97 (0.70, 1.34) | 1.28 (0.82, 2.01) | 1.28 (1.03, 1.60)  | 1.46 (1.06, 2.01) |
| Higher                                   | 0.75 (0.33, 1.70) | 1.18 (0.45, 3.13) | 1.83 (1.20, 2.78)  | 1.70 (0.99, 2.93) |

|                                   | UNDERWEIGHT       |                   | OVERWEIGHT/OBESITY |                   |
|-----------------------------------|-------------------|-------------------|--------------------|-------------------|
| <b>Wealth Quintile</b>            |                   |                   |                    |                   |
| Poorest (Reference)               | 1.00              | 1.00              | 1.00               | 1.00              |
| Poorer                            | 0.69 (0.49, 0.97) | 0.81 (0.56, 1.17) | 1.80 (1.26, 2.57)  | 1.16 (0.80, 1.69) |
| Middle                            | 0.69 (0.50, 0.97) | 0.70 (0.46, 1.06) | 2.59 (1.91, 3.52)  | 1.41 (0.98, 2.04) |
| Richer                            | 0.45 (0.28, 0.72) | 0.32 (0.14, 0.70) | 4.50 (3.34, 6.07)  | 2.11 (1.29, 3.46) |
| Richest                           | 0.53 (0.36, 0.79) | 0.35 (0.15, 0.84) | 6.75 (5.09, 8.94)  | 3.12 (1.82, 5.35) |
| <b>Occupation</b>                 |                   |                   |                    |                   |
| Not Working (Reference)           | 1.00              | 1.00              | 1.00               | 1.00              |
| Nonmanual                         | 0.52 (0.37, 0.74) | 0.57 (0.39, 0.84) | 3.54 (2.84, 4.41)  | 1.59 (1.24, 2.03) |
| Manual                            | 0.82 (0.53, 1.28) | 0.98 (0.60, 1.60) | 1.93 (1.47, 2.54)  | 1.16 (0.84, 1.59) |
| Agricultural                      | 0.93 (0.67, 1.29) | 0.81 (0.53, 1.26) | 0.88 (0.65, 1.18)  | 0.94 (0.67, 1.31) |
| <b>Media Exposure</b>             |                   |                   |                    |                   |
| Not Exposed (Reference)           | 1.00              | 1.00              | 1.00               | 1.00              |
| Exposed to one media source       | 0.79 (0.59, 1.05) | 0.89 (0.65, 1.22) | 1.36 (1.10, 1.68)  | 1.13 (0.91, 1.41) |
| Exposed to two media sources      | 0.65 (0.47, 0.89) | 0.90 (0.62, 1.32) | 2.53 (2.04, 3.13)  | 1.36 (1.04, 1.77) |
| Exposed to three media sources    | 0.68 (0.41, 1.11) | 0.89 (0.48, 1.65) | 2.50 (1.87, 3.33)  | 1.39 (0.95, 2.04) |
| <b>Hormonal Contraceptive Use</b> |                   |                   |                    |                   |
| No (Reference)                    | 1.00              | 1.00              | 1.00               | 1.00              |
| Yes                               | 0.37 (0.21, 0.66) | 0.44 (0.24, 0.80) | 1.08 (0.87, 1.34)  | 0.98 (0.76, 1.28) |

Overall Model Fit:  $F(86, 234) = 9.74, P=0.0000$ .

**Table S61:** Unadjusted and adjusted relative risk ratio, of underweight and overweight/obesity among women of child-bearing age in Cameroon.

| VARIABLES                            | UNDERWEIGHT             |                       | OVERWEIGHT/OBESITY      |                       |
|--------------------------------------|-------------------------|-----------------------|-------------------------|-----------------------|
|                                      | Unadjusted RRR (95% CI) | Adjusted RRR (95% CI) | Unadjusted RRR (95% CI) | Adjusted RRR (95% CI) |
| <b>Age</b>                           |                         |                       |                         |                       |
| 15-19 (Reference)                    | 1.00                    | 1.00                  | 1.00                    | 1.00                  |
| 20-24                                | 0.85 (0.64, 1.12)       | 0.81 (0.56, 1.16)     | 1.65 (1.35, 2.02)       | 1.34 (1.03, 1.72)     |
| 25-29                                | 0.91 (0.63, 1.32)       | 0.84 (0.52, 1.37)     | 2.43 (2.01, 2.95)       | 1.96 (1.49, 2.59)     |
| 30-34                                | 0.60 (0.38, 0.93)       | 0.63 (0.37, 1.08)     | 3.53 (2.82, 4.43)       | 2.92 (2.13, 4.02)     |
| 35-39                                | 1.23 (0.85, 1.78)       | 1.19 (0.70, 2.00)     | 5.01 (4.01, 6.26)       | 4.52 (3.19, 6.40)     |
| 40-44                                | 0.98 (0.64, 1.51)       | 1.05 (0.58, 1.90)     | 5.20 (4.13, 6.55)       | 5.57 (3.89, 7.98)     |
| 45-49                                | 0.91 (0.58, 1.43)       | 1.01 (0.55, 1.86)     | 4.52 (3.57, 5.73)       | 4.92 (3.35, 7.24)     |
| <b>Ethnicity</b>                     |                         |                       |                         |                       |
| Bamilike/Bamoun (Reference)          | 1.00                    | 1.00                  | 1.00                    | 1.00                  |
| Arabes-<br>Choa/Peulh/Haoussa/Kanuri | 16.1 (9.41, 27.4)       | 6.48 (2.65, 15.9)     | 0.23 (0.16, 0.31)       | 0.31 (0.19, 0.50)     |
| Biu-Mandara                          | 5.49 (3.19, 9.44)       | 2.42 (0.97, 6.03)     | 0.15 (0.10, 0.21)       | 0.44 (0.28, 0.70)     |
| Adamaoua-Oubangui                    | 5.65 (3.23, 9.88)       | 2.62 (1.10, 6.24)     | 0.21 (0.15, 0.30)       | 0.40 (0.27, 0.59)     |
| Bantoïde Sud-Ouest                   | 3.65 (1.20, 11.1)       | 3.16 (0.85, 11.8)     | 0.61 (0.33, 1.14)       | 0.51 (0.29, 0.89)     |
| Grassfields                          | 1.26 (0.65, 2.43)       | 1.10 (0.43, 2.81)     | 0.62 (0.51, 0.77)       | 0.70 (0.49, 0.98)     |
| Côtier/Ngoe/Oroko                    | 2.62 (1.18, 5.79)       | 2.89 (1.26, 6.60)     | 0.55 (0.41, 0.73)       | 0.45 (0.31, 0.64)     |
| Beti/Bassa/Mbam                      | 2.96 (1.69, 5.17)       | 3.52 (1.92, 6.47)     | 0.50 (0.41, 0.60)       | 0.42 (0.33, 0.54)     |
| Kako/Meka/Pygmé                      | 4.24 (2.18, 8.27)       | 2.46 (0.98, 6.19)     | 0.31 (0.23, 0.43)       | 0.26 (0.15, 0.45)     |
| Stranger/Others                      | 8.50 (3.90, 18.6)       | 5.09 (1.89, 13.7)     | 0.58 (0.37, 0.90)       | 0.68 (0.44, 1.05)     |
| <b>Religion</b>                      |                         |                       |                         |                       |
| Catholics (Reference)                | 1.00                    | 1.00                  | 1.00                    | 1.00                  |
| Other Christians                     | 1.28 (0.97, 1.69)       | 1.24 (0.93, 1.66)     | 1.01 (0.88, 1.16)       | 1.01 (0.87, 1.18)     |
| Islam                                | 3.64 (2.55, 5.19)       | 1.31 (0.82, 2.09)     | 0.66 (0.54, 0.81)       | 1.10 (0.83, 1.47)     |
| Traditionalists                      | 1.95 (1.12, 3.40)       | 1.04 (0.52, 2.06)     | 0.27 (0.14, 0.52)       | 0.54 (0.30, 0.98)     |
| Others                               | 1.53 (0.53, 4.45)       | 1.56 (0.51, 4.76)     | 0.88 (0.50, 1.56)       | 0.68 (0.36, 1.30)     |
| No Religion                          | 1.66 (0.72, 3.84)       | 1.30 (0.56, 3.03)     | 0.81 (0.54, 1.21)       | 0.94 (0.61, 1.45)     |
| <b>Parity</b>                        |                         |                       |                         |                       |
| 0 (Reference)                        | 1.00                    | 1.00                  | 1.00                    | 1.00                  |
| 1                                    | 1.02 (0.70, 1.48)       | 1.24 (0.82, 1.87)     | 1.78 (1.46, 2.16)       | 1.30 (1.00, 1.69)     |
| 2                                    | 1.38 (0.86, 2.21)       | 1.70 (1.03, 2.81)     | 2.21 (1.78, 2.74)       | 1.44 (1.06, 1.96)     |
| 3                                    | 1.20 (0.82, 1.74)       | 1.49 (0.89, 2.50)     | 2.04 (1.63, 2.55)       | 1.24 (0.91, 1.71)     |
| 4                                    | 1.07 (0.66, 1.75)       | 1.37 (0.77, 2.44)     | 2.87 (2.27, 3.63)       | 1.45 (1.02, 2.05)     |
| 5                                    | 1.27 (0.80, 2.02)       | 1.52 (0.83, 2.78)     | 2.90 (2.22, 3.78)       | 1.57 (1.04, 2.35)     |
| 6+                                   | 1.42 (1.02, 1.98)       | 1.18 (0.70, 2.00)     | 2.24 (1.87, 2.68)       | 1.44 (1.02, 2.04)     |
| <b>Marital Status</b>                |                         |                       |                         |                       |
| Single (Reference)                   | 1.00                    | 1.00                  | 1.00                    | 1.00                  |
| Married                              | 1.31 (1.00, 1.72)       | 0.63 (0.42, 0.96)     | 2.04 (1.77, 2.35)       | 1.37 (1.08, 1.75)     |
| Formerly Married                     | 0.62 (0.38, 1.01)       | 0.33 (0.18, 0.60)     | 2.16 (1.72, 2.71)       | 1.01 (0.73, 1.40)     |
| <b>Residential Setting</b>           |                         |                       |                         |                       |
| Rural (Reference)                    | 1.00                    | 1.00                  | 1.00                    | 1.00                  |
| Urban                                | 0.66 (0.50, 0.85)       | 1.28 (0.88, 1.88)     | 2.32 (2.01, 2.67)       | 0.89 (0.70, 1.12)     |



|                                   | UNDERWEIGHT       |                   | OVERWEIGHT/OBESITY |                   |
|-----------------------------------|-------------------|-------------------|--------------------|-------------------|
| <b>Region</b>                     |                   |                   |                    |                   |
| Yaoundé (Reference)               | 1.00              | 1.00              | 1.00               | 1.00              |
| Adamaoua                          | 4.69 (2.47, 8.91) | 2.37 (0.88, 6.40) | 0.40 (0.29, 0.55)  | 0.75 (0.49, 1.13) |
| Centre (sans Yaoundé)             | 0.86 (0.44, 1.72) | 0.77 (0.38, 1.58) | 0.45 (0.33, 0.62)  | 0.65 (0.43, 0.97) |
| Douala                            | 1.01 (0.46, 2.20) | 1.13 (0.52, 2.46) | 1.01 (0.79, 1.28)  | 0.82 (0.62, 1.07) |
| Est                               | 2.81 (1.50, 5.23) | 2.09 (0.94, 4.62) | 0.50 (0.37, 0.68)  | 1.25 (0.81, 1.94) |
| Extrême-Nord                      | 3.81 (2.09, 6.93) | 2.01 (0.76, 5.31) | 0.11 (0.07, 0.17)  | 0.31 (0.17, 0.58) |
| Littoral (sans Douala)            | 0.69 (0.26, 1.83) | 0.68 (0.25, 1.85) | 0.89 (0.65, 1.22)  | 1.04 (0.73, 1.48) |
| Nord                              | 2.88 (1.59, 5.21) | 1.58 (0.61, 4.07) | 0.29 (0.20, 0.41)  | 0.71 (0.43, 1.19) |
| Nord-Ouest                        | 0.68 (0.32, 1.44) | 1.20 (0.40, 3.65) | 0.62 (0.47, 0.81)  | 0.93 (0.60, 1.45) |
| Ouest                             | 0.53 (0.22, 1.27) | 1.06 (0.42, 2.68) | 0.93 (0.73, 1.19)  | 0.91 (0.66, 1.27) |
| Sud                               | 1.86 (0.92, 3.78) | 1.44 (0.66, 3.15) | 0.50 (0.37, 0.67)  | 0.81 (0.58, 1.12) |
| Sud-Ouest                         | 0.94 (0.43, 2.07) | 1.06 (0.43, 2.60) | 0.91 (0.68, 1.21)  | 1.20 (0.83, 1.74) |
| <b>Level of Education</b>         |                   |                   |                    |                   |
| No Education (Reference)          | 1.00              | 1.00              | 1.00               | 1.00              |
| Primary                           | 0.49 (0.38, 0.64) | 0.94 (0.67, 1.31) | 2.40 (1.89, 3.06)  | 1.07 (0.78, 1.46) |
| Secondary                         | 0.28 (0.21, 0.38) | 0.82 (0.51, 1.32) | 2.89 (2.31, 3.62)  | 1.21 (0.86, 1.70) |
| Higher                            | 0.20 (0.10, 0.40) | 0.84 (0.35, 2.02) | 4.12 (3.04, 5.58)  | 1.05 (0.67, 1.65) |
| <b>Wealth Quintile</b>            |                   |                   |                    |                   |
| Poorest (Reference)               | 1.00              | 1.00              | 1.00               | 1.00              |
| Poorer                            | 0.54 (0.39, 0.76) | 0.73 (0.49, 1.10) | 2.52 (1.83, 3.47)  | 1.44 (1.01, 2.05) |
| Middle                            | 0.40 (0.28, 0.58) | 0.50 (0.31, 0.81) | 4.64 (3.35, 6.44)  | 2.21 (1.50, 3.26) |
| Richer                            | 0.44 (0.30, 0.66) | 0.63 (0.35, 1.15) | 5.77 (4.22, 7.87)  | 2.50 (1.61, 3.90) |
| Richest                           | 0.32 (0.21, 0.48) | 0.51 (0.26, 1.00) | 8.03 (5.91, 10.9)  | 3.51 (2.24, 5.50) |
| <b>Occupation</b>                 |                   |                   |                    |                   |
| Not Working (Reference)           | 1.00              | 1.00              | 1.00               | 1.00              |
| Nonmanual                         | 0.70 (0.51, 0.96) | 0.81 (0.58, 1.12) | 2.43 (2.08, 2.85)  | 1.20 (0.99, 1.46) |
| Manual                            | 0.70 (0.42, 1.17) | 0.79 (0.52, 1.19) | 1.72 (1.40, 2.12)  | 1.18 (0.94, 1.48) |
| Agricultural                      | 0.75 (0.56, 1.00) | 0.76 (0.52, 1.10) | 0.88 (0.73, 1.06)  | 0.61 (0.48, 0.78) |
| <b>Media Exposure</b>             |                   |                   |                    |                   |
| Not Exposed (Reference)           | 1.00              | 1.00              | 1.00               | 1.00              |
| Exposed to one media source       | 0.72 (0.56, 0.94) | 1.15 (0.87, 1.52) | 2.16 (1.73, 2.69)  | 1.08 (0.84, 1.39) |
| Exposed to two media sources      | 0.49 (0.37, 0.66) | 0.96 (0.68, 1.34) | 2.64 (2.16, 3.22)  | 1.08 (0.83, 1.41) |
| Exposed to three media sources    | 0.33 (0.22, 0.50) | 0.79 (0.48, 1.31) | 3.21 (2.62, 3.94)  | 1.24 (0.93, 1.66) |
| <b>Hormonal Contraceptive Use</b> |                   |                   |                    |                   |
| No (Reference)                    | 1.00              | 1.00              | 1.00               | 1.00              |
| Yes                               | 0.65 (0.35, 1.21) | 0.91 (0.50, 1.69) | 1.33 (1.03, 1.72)  | 0.79 (0.59, 1.06) |

Overall Model Fit:  $F(108, 447) = 11.56, P=0.0000$ .

**Table S62:** Unadjusted and adjusted relative risk ratio, of underweight and overweight/obesity among women of child-bearing age in Comoros.

| VARIABLES                         | UNDERWEIGHT                |                          | OVERWEIGHT/OBESITY         |                          |
|-----------------------------------|----------------------------|--------------------------|----------------------------|--------------------------|
|                                   | Unadjusted<br>RRR (95% CI) | Adjusted<br>RRR (95% CI) | Unadjusted<br>RRR (95% CI) | Adjusted<br>RRR (95% CI) |
| <b>Age</b>                        |                            |                          |                            |                          |
| 15-19 (Reference)                 | 1.00                       | 1.00                     | 1.00                       | 1.00                     |
| 20-24                             | 0.70 (0.46, 1.06)          | 0.81 (0.54, 1.21)        | 2.10 (1.56, 2.82)          | 1.69 (1.25, 2.28)        |
| 25-29                             | 0.55 (0.35, 0.87)          | 0.78 (0.48, 1.28)        | 4.28 (3.26, 5.62)          | 2.71 (1.99, 3.69)        |
| 30-34                             | 0.39 (0.22, 0.71)          | 0.66 (0.34, 1.26)        | 5.81 (4.49, 7.53)          | 3.47 (2.39, 5.03)        |
| 35-39                             | 0.31 (0.16, 0.60)          | 0.53 (0.24, 1.17)        | 5.77 (4.43, 7.51)          | 3.14 (2.24, 4.40)        |
| 40-44                             | 0.62 (0.34, 1.16)          | 1.04 (0.50, 2.19)        | 5.81 (4.32, 7.81)          | 2.97 (2.01, 4.39)        |
| 45-49                             | 0.73 (0.35, 1.51)          | 1.22 (0.44, 3.38)        | 8.23 (5.75, 11.79)         | 4.31 (2.79, 6.66)        |
| <b>Parity</b>                     |                            |                          |                            |                          |
| 0 (Reference)                     | 1.00                       | 1.00                     | 1.00                       | 1.00                     |
| 1                                 | 0.78 (0.44, 1.38)          | 1.19 (0.60, 2.36)        | 2.65 (2.04, 3.45)          | 1.45 (1.03, 2.06)        |
| 2                                 | 0.65 (0.36, 1.16)          | 1.08 (0.51, 2.31)        | 2.63 (1.97, 3.51)          | 1.27 (0.89, 1.85)        |
| 3                                 | 0.40 (0.20, 0.82)          | 0.68 (0.32, 1.47)        | 3.64 (2.76, 4.81)          | 1.76 (1.25, 2.49)        |
| 4                                 | 0.30 (0.13, 0.69)          | 0.53 (0.20, 1.46)        | 3.86 (2.77, 5.37)          | 1.74 (1.11, 2.71)        |
| 5                                 | 0.50 (0.24, 1.05)          | 0.94 (0.36, 2.43)        | 2.99 (2.15, 4.15)          | 1.27 (0.82, 1.96)        |
| 6+                                | 0.63 (0.35, 1.11)          | 1.05 (0.48, 2.31)        | 3.73 (2.93, 4.75)          | 1.75 (1.17, 2.64)        |
| <b>Marital Status</b>             |                            |                          |                            |                          |
| Single (Reference)                | 1.00                       | 1.00                     | 1.00                       | 1.00                     |
| Married                           | 0.51 (0.39, 0.67)          | 0.75 (0.45, 1.25)        | 3.84 (3.11, 4.76)          | 1.42 (1.02, 1.96)        |
| Formerly Married                  | 0.93 (0.54, 1.59)          | 1.25 (0.67, 2.34)        | 2.59 (1.89, 3.55)          | 0.97 (0.66, 1.44)        |
| <b>Residential Setting</b>        |                            |                          |                            |                          |
| Rural (Reference)                 | 1.00                       | 1.00                     | 1.00                       | 1.00                     |
| Urban                             | 0.94 (0.68, 1.30)          | 0.87 (0.60, 1.27)        | 1.55 (1.27, 1.89)          | 1.28 (1.03, 1.60)        |
| <b>Region</b>                     |                            |                          |                            |                          |
| Ngazidja (Reference)              | 1.00                       | 1.00                     | 1.00                       | 1.00                     |
| Mwali                             | 1.34 (0.86, 2.07)          | 1.31 (0.72, 2.37)        | 1.33 (1.07, 1.67)          | 1.85 (1.37, 2.50)        |
| Ndzuwani                          | 1.07 (0.76, 1.51)          | 1.12 (0.71, 1.74)        | 1.03 (0.84, 1.27)          | 1.27 (0.98, 1.64)        |
| <b>Level of Education</b>         |                            |                          |                            |                          |
| No Education (Reference)          | 1.00                       | 1.00                     | 1.00                       | 1.00                     |
| Primary                           | 1.38 (0.87, 2.17)          | 1.27 (0.76, 2.11)        | 0.92 (0.71, 1.20)          | 1.15 (0.87, 1.53)        |
| Secondary                         | 1.86 (1.27, 2.72)          | 1.43 (0.90, 2.28)        | 0.59 (0.49, 0.71)          | 0.96 (0.75, 1.21)        |
| Higher                            | 1.28 (0.67, 2.44)          | 1.25 (0.61, 2.56)        | 1.05 (0.81, 1.35)          | 0.88 (0.65, 1.21)        |
| <b>Wealth Quintile</b>            |                            |                          |                            |                          |
| Poorest (Reference)               | 1.00                       | 1.00                     | 1.00                       | 1.00                     |
| Poorer                            | 1.47 (0.94, 2.28)          | 1.38 (0.87, 2.19)        | 1.34 (0.99, 1.81)          | 1.60 (1.19, 2.16)        |
| Middle                            | 1.11 (0.68, 1.80)          | 1.08 (0.61, 1.91)        | 1.67 (1.24, 2.26)          | 2.00 (1.43, 2.79)        |
| Richer                            | 0.89 (0.55, 1.42)          | 0.83 (0.47, 1.46)        | 1.65 (1.23, 2.20)          | 1.95 (1.40, 2.71)        |
| Richest                           | 1.23 (0.74, 2.04)          | 1.08 (0.57, 2.07)        | 2.18 (1.63, 2.91)          | 2.63 (1.87, 3.70)        |
| <b>Occupation</b>                 |                            |                          |                            |                          |
| Not Working (Reference)           | 1.00                       | 1.00                     | 1.00                       | 1.00                     |
| Nonmanual                         | 0.72 (0.48, 1.06)          | 0.82 (0.52, 1.29)        | 2.17 (1.77, 2.67)          | 1.32 (1.07, 1.64)        |
| Manual                            | 0.76 (0.47, 1.23)          | 0.85 (0.53, 1.37)        | 0.99 (0.72, 1.36)          | 0.86 (0.61, 1.22)        |
| Agricultural                      | 0.68 (0.41, 1.14)          | 0.92 (0.50, 1.68)        | 1.63 (1.20, 2.23)          | 1.15 (0.79, 1.68)        |
| <b>Media Exposure</b>             |                            |                          |                            |                          |
| Not Exposed (Reference)           | 1.00                       | 1.00                     | 1.00                       | 1.00                     |
| Exposed to one media source       | 1.23 (0.79, 1.92)          | 1.09 (0.69, 1.72)        | 1.18 (0.91, 1.54)          | 1.15 (0.87, 1.51)        |
| Exposed to two media sources      | 1.08 (0.75, 1.56)          | 0.97 (0.67, 1.41)        | 1.29 (1.01, 1.66)          | 1.28 (0.96, 1.72)        |
| Exposed to three media sources    | 1.55 (1.00, 2.41)          | 1.24 (0.77, 2.00)        | 1.19 (0.92, 1.53)          | 1.61 (1.13, 2.28)        |
| <b>Hormonal Contraceptive Use</b> |                            |                          |                            |                          |
| No (Reference)                    | 1.00                       | 1.00                     | 1.00                       | 1.00                     |
| Yes                               | 0.47 (0.22, 0.98)          | 0.68 (0.32, 1.47)        | 2.04 (1.56, 2.65)          | 1.15 (0.87, 1.52)        |

Overall Model Fit:  $F(62, 185) = 12.61, P=0.0000$ .



**Table S63:** Unadjusted and adjusted relative risk ratio, of underweight and overweight/obesity among women of child-bearing age in Tanzania.

| VARIABLES                  | UNDERWEIGHT             |                       | OVERWEIGHT/OBESITY      |                       |
|----------------------------|-------------------------|-----------------------|-------------------------|-----------------------|
|                            | Unadjusted RRR (95% CI) | Adjusted RRR (95% CI) | Unadjusted RRR (95% CI) | Adjusted RRR (95% CI) |
| <b>Age</b>                 |                         |                       |                         |                       |
| 15-19 (Reference)          | 1.00                    | 1.00                  | 1.00                    | 1.00                  |
| 20-24                      | 0.44 (0.35, 0.56)       | 0.67 (0.52, 0.87)     | 1.85 (1.47, 2.34)       | 1.70 (1.27, 2.27)     |
| 25-29                      | 0.35 (0.27, 0.46)       | 0.65 (0.46, 0.92)     | 3.22 (2.53, 4.11)       | 3.12 (2.24, 4.36)     |
| 30-34                      | 0.48 (0.37, 0.64)       | 1.00 (0.69, 1.47)     | 4.52 (3.61, 5.67)       | 4.94 (3.58, 6.81)     |
| 35-39                      | 0.49 (0.37, 0.65)       | 1.08 (0.73, 1.59)     | 4.75 (3.81, 5.93)       | 5.86 (4.19, 8.21)     |
| 40-44                      | 0.59 (0.45, 0.77)       | 1.29 (0.87, 1.91)     | 5.63 (4.53, 6.99)       | 8.44 (6.05, 11.8)     |
| 45-49                      | 0.59 (0.44, 0.79)       | 1.27 (0.82, 1.97)     | 5.48 (4.46, 6.73)       | 8.99 (6.51, 12.4)     |
| <b>Parity</b>              |                         |                       |                         |                       |
| 0 (Reference)              | 1.00                    | 1.00                  | 1.00                    | 1.00                  |
| 1                          | 0.51 (0.39, 0.66)       | 0.84 (0.62, 1.16)     | 1.65 (1.37, 1.98)       | 1.07 (0.84, 1.38)     |
| 2                          | 0.39 (0.30, 0.51)       | 0.70 (0.47, 1.05)     | 2.42 (2.02, 2.89)       | 1.06 (0.80, 1.41)     |
| 3                          | 0.47 (0.35, 0.62)       | 0.79 (0.51, 1.23)     | 2.53 (2.11, 3.04)       | 0.92 (0.69, 1.24)     |
| 4                          | 0.53 (0.40, 0.72)       | 0.79 (0.53, 1.18)     | 2.29 (1.82, 2.88)       | 0.92 (0.66, 1.30)     |
| 5                          | 0.51 (0.37, 0.71)       | 0.66 (0.41, 1.05)     | 1.96 (1.54, 2.48)       | 0.80 (0.57, 1.12)     |
| 6+                         | 0.52 (0.42, 0.64)       | 0.56 (0.38, 0.85)     | 1.81 (1.49, 2.20)       | 0.78 (0.57, 1.08)     |
| <b>Marital Status</b>      |                         |                       |                         |                       |
| Single (Reference)         | 1.00                    | 1.00                  | 1.00                    | 1.00                  |
| Married                    | 0.49 (0.42, 0.57)       | 0.62 (0.48, 0.81)     | 2.01 (1.76, 2.30)       | 1.32 (1.06, 1.64)     |
| Formerly Married           | 0.52 (0.40, 0.68)       | 0.66 (0.47, 0.93)     | 2.03 (1.72, 2.40)       | 1.07 (0.84, 1.35)     |
| <b>Residential Setting</b> |                         |                       |                         |                       |
| Rural (Reference)          | 1.00                    | 1.00                  | 1.00                    | 1.00                  |
| Urban                      | 0.93 (0.78, 1.10)       | 1.07 (0.85, 1.35)     | 2.66 (2.33, 3.05)       | 1.05 (0.88, 1.25)     |

|                                | UNDERWEIGHT       |                   | OVERWEIGHT/OBESITY |                   |
|--------------------------------|-------------------|-------------------|--------------------|-------------------|
| <b>Region</b>                  |                   |                   |                    |                   |
| Dar es salaam (Reference)      | 1.00              | 1.00              | 1.00               | 1.00              |
| Dodoma                         | 1.35 (0.89, 2.06) | 1.07 (0.66, 1.72) | 0.35 (0.24, 0.51)  | 0.85 (0.58, 1.25) |
| Arusha                         | 1.52 (1.01, 2.30) | 1.28 (0.81, 2.03) | 0.56 (0.41, 0.77)  | 0.94 (0.71, 1.23) |
| Kilimanjaro                    | 0.92 (0.54, 1.59) | 0.78 (0.44, 1.39) | 0.82 (0.55, 1.23)  | 1.20 (0.82, 1.74) |
| Tanga                          | 1.01 (0.62, 1.64) | 0.82 (0.47, 1.43) | 0.67 (0.46, 0.99)  | 1.22 (0.87, 1.71) |
| Morogoro                       | 0.34 (0.20, 0.59) | 0.33 (0.19, 0.58) | 0.60 (0.42, 0.86)  | 1.17 (0.83, 1.64) |
| Pwani                          | 1.13 (0.75, 1.70) | 1.04 (0.67, 1.64) | 0.70 (0.47, 1.03)  | 1.35 (0.87, 2.10) |
| Lindi                          | 0.68 (0.40, 1.14) | 0.62 (0.34, 1.15) | 0.42 (0.31, 0.58)  | 1.06 (0.72, 1.58) |
| Mtwara                         | 0.93 (0.57, 1.52) | 0.86 (0.50, 1.47) | 0.46 (0.34, 0.62)  | 1.12 (0.82, 1.53) |
| Ruvuma                         | 0.63 (0.36, 1.12) | 0.59 (0.33, 1.08) | 0.29 (0.19, 0.47)  | 0.63 (0.42, 0.96) |
| Iringa                         | 0.79 (0.52, 1.20) | 0.68 (0.43, 1.06) | 0.43 (0.29, 0.64)  | 0.72 (0.49, 1.07) |
| Mbeya                          | 0.40 (0.22, 0.71) | 0.31 (0.17, 0.57) | 0.54 (0.36, 0.80)  | 1.19 (0.80, 1.75) |
| Singida                        | 1.63 (1.08, 2.46) | 1.42 (0.91, 2.23) | 0.35 (0.25, 0.51)  | 0.97 (0.66, 1.41) |
| Tabora                         | 1.02 (0.65, 1.60) | 0.83 (0.49, 1.41) | 0.38 (0.29, 0.52)  | 1.34 (0.97, 1.85) |
| Rukwa                          | 0.46 (0.26, 0.80) | 0.39 (0.22, 0.71) | 0.29 (0.20, 0.42)  | 0.78 (0.52, 1.16) |
| Kigoma                         | 0.96 (0.63, 1.46) | 0.81 (0.50, 1.32) | 0.25 (0.19, 0.35)  | 0.78 (0.54, 1.14) |
| Shinyanga                      | 0.77 (0.50, 1.18) | 0.64 (0.40, 1.04) | 0.35 (0.25, 0.48)  | 0.90 (0.67, 1.21) |
| Kagera                         | 1.16 (0.73, 1.86) | 1.02 (0.61, 1.71) | 0.19 (0.13, 0.28)  | 0.53 (0.35, 0.79) |
| Mwanza                         | 0.82 (0.51, 1.33) | 0.65 (0.40, 1.03) | 0.31 (0.21, 0.45)  | 0.68 (0.48, 0.98) |
| Mara                           | 0.89 (0.58, 1.36) | 0.79 (0.50, 1.26) | 0.21 (0.13, 0.32)  | 0.46 (0.31, 0.68) |
| Manyara                        | 1.53 (0.99, 2.36) | 1.14 (0.71, 1.82) | 0.30 (0.22, 0.42)  | 0.91 (0.62, 1.32) |
| Njombe                         | 0.47 (0.25, 0.86) | 0.44 (0.23, 0.85) | 0.44 (0.34, 0.58)  | 0.81 (0.59, 1.12) |
| Katavi                         | 0.70 (0.41, 1.22) | 0.61 (0.34, 1.10) | 0.28 (0.20, 0.40)  | 0.86 (0.62, 1.20) |
| Simiyu                         | 1.24 (0.81, 1.91) | 0.98 (0.60, 1.60) | 0.19 (0.13, 0.28)  | 0.67 (0.47, 0.96) |
| geita                          | 1.17 (0.75, 1.82) | 1.01 (0.61, 1.66) | 0.28 (0.19, 0.41)  | 0.85 (0.61, 1.19) |
| Kaskazini Unguja               | 1.58 (0.98, 2.52) | 1.29 (0.75, 2.22) | 0.71 (0.55, 0.92)  | 1.38 (0.94, 2.03) |
|                                | 1.51 (0.97, 2.34) | 1.37 (0.84, 2.23) | 0.81 (0.57, 1.15)  | 1.32 (0.88, 1.97) |
| Kusini Unguja                  | 1.78 (1.29, 2.48) | 1.63 (1.16, 2.29) | 0.97 (0.76, 1.24)  | 1.05 (0.78, 1.42) |
| Mjini Magharibi                | 1.34 (0.89, 2.02) | 0.96 (0.61, 1.51) | 0.46 (0.30, 0.71)  | 0.95 (0.60, 1.49) |
| Kaskazini Pemba                | 0.89 (0.57, 1.40) | 0.61 (0.37, 1.01) | 0.59 (0.40, 0.87)  | 1.36 (0.94, 1.96) |
| Kusini Pemba                   |                   |                   |                    |                   |
| <b>Level of Education</b>      |                   |                   |                    |                   |
| No Education (Reference)       | 1.00              | 1.00              | 1.00               | 1.00              |
| Primary                        | 1.02 (0.81, 1.28) | 1.05 (0.83, 1.33) | 1.44 (1.23, 1.69)  | 1.04 (0.88, 1.24) |
| Secondary                      | 1.22 (0.95, 1.57) | 0.99 (0.72, 1.36) | 1.79 (1.48, 2.15)  | 1.14 (0.91, 1.44) |
| Higher                         | 0.59 (0.17, 2.02) | 0.73 (0.20, 2.67) | 6.09 (3.96, 9.36)  | 1.55 (1.04, 2.31) |
| <b>Wealth Quintile</b>         |                   |                   |                    |                   |
| Poorest (Reference)            | 1.00              | 1.00              | 1.00               | 1.00              |
| Poorer                         | 0.98 (0.79, 1.23) | 1.06 (0.86, 1.32) | 1.38 (1.11, 1.72)  | 1.33 (1.06, 1.67) |
| Middle                         | 0.72 (0.57, 0.91) | 0.75 (0.60, 0.96) | 1.79 (1.45, 2.23)  | 1.71 (1.36, 2.14) |
| Richer                         | 0.82 (0.65, 1.04) | 0.74 (0.57, 0.96) | 3.52 (2.88, 4.32)  | 2.92 (2.32, 3.68) |
| Richest                        | 0.79 (0.63, 1.00) | 0.57 (0.41, 0.81) | 6.19 (5.07, 7.56)  | 4.57 (3.42, 6.12) |
| <b>Occupation</b>              |                   |                   |                    |                   |
| Not Working (Reference)        | 1.00              | 1.00              | 1.00               | 1.00              |
| Nonmanual                      | 0.49 (0.38, 0.63) | 0.67 (0.50, 0.89) | 2.80 (2.40, 3.27)  | 1.30 (1.08, 1.57) |
| Manual                         | 0.54 (0.42, 0.70) | 0.81 (0.61, 1.06) | 2.19 (1.86, 2.58)  | 1.09 (0.91, 1.30) |
| Agricultural                   | 0.58 (0.49, 0.68) | 0.74 (0.60, 0.92) | 0.78 (0.67, 0.92)  | 0.79 (0.66, 0.95) |
| <b>Media Exposure</b>          |                   |                   |                    |                   |
| Not Exposed (Reference)        | 1.00              | 1.00              | 1.00               | 1.00              |
| Exposed to one media source    | 0.74 (0.59, 0.93) | 0.74 (0.59, 0.93) | 1.26 (1.03, 1.54)  | 0.97 (0.79, 1.18) |
| Exposed to two media sources   | 0.79 (0.62, 1.00) | 0.74 (0.58, 0.94) | 1.94 (1.60, 2.36)  | 1.18 (0.98, 1.43) |
| Exposed to three media sources | 0.72 (0.58, 0.91) | 0.67 (0.52, 0.88) | 2.80 (2.29, 3.42)  | 1.30 (1.05, 1.62) |

|                                   | UNDERWEIGHT       |                   | OVERWEIGHT/OBESITY |                   |
|-----------------------------------|-------------------|-------------------|--------------------|-------------------|
| <b>Hormonal Contraceptive Use</b> |                   |                   |                    |                   |
| No (Reference)                    | 1.00              | 1.00              | 1.00               | 1.00              |
| Yes                               | 0.54 (0.44, 0.67) | 0.83 (0.66, 1.05) | 1.23 (1.08, 1.39)  | 1.10 (0.97, 1.26) |

Overall Model Fit:  $F(116, 434) = 16.49, P=0.0000$ .

**Table S64:** Unadjusted and adjusted relative risk ratio, of underweight and overweight/obesity among women of child-bearing age in Zimbabwe.

| VARIABLES                  | UNDERWEIGHT             |                       | OVERWEIGHT/OBESITY      |                       |
|----------------------------|-------------------------|-----------------------|-------------------------|-----------------------|
|                            | Unadjusted RRR (95% CI) | Adjusted RRR (95% CI) | Unadjusted RRR (95% CI) | Adjusted RRR (95% CI) |
| <b>Age</b>                 |                         |                       |                         |                       |
| 15-19 (Reference)          | 1.00                    | 1.00                  | 1.00                    | 1.00                  |
| 20-24                      | 0.55 (0.42, 0.72)       | 0.89 (0.65, 1.23)     | 1.94 (1.58, 2.38)       | 1.42 (1.11, 1.82)     |
| 25-29                      | 0.28 (0.19, 0.42)       | 0.64 (0.40, 1.03)     | 3.06 (2.48, 3.79)       | 2.08 (1.55, 2.80)     |
| 30-34                      | 0.48 (0.35, 0.66)       | 1.21 (0.72, 2.02)     | 5.19 (4.21, 6.40)       | 3.28 (2.44, 4.42)     |
| 35-39                      | 0.53 (0.36, 0.77)       | 1.29 (0.72, 2.31)     | 5.67 (4.52, 7.12)       | 3.60 (2.62, 4.93)     |
| 40-44                      | 0.42 (0.27, 0.65)       | 0.92 (0.49, 1.73)     | 7.09 (5.71, 8.81)       | 4.56 (3.33, 6.26)     |
| 45-49                      | 0.64 (0.40, 1.04)       | 1.31 (0.67, 2.57)     | 6.95 (5.35, 9.03)       | 4.77 (3.28, 6.93)     |
| <b>Religion</b>            |                         |                       |                         |                       |
| Catholics (Reference)      | 1.00                    | 1.00                  | 1.00                    | 1.00                  |
| Other Christians           | 1.04 (0.71, 1.51)       | 1.09 (0.74, 1.60)     | 0.83 (0.68, 1.02)       | 0.95 (0.76, 1.19)     |
| Islam                      | 0.77 (0.09, 6.49)       | 0.91 (0.14, 6.07)     | 1.01 (0.35, 2.92)       | 1.13 (0.35, 3.63)     |
| Traditionalist             | 0.55 (0.08, 3.83)       | 0.66 (0.10, 4.53)     | 1.09 (0.57, 2.08)       | 1.26 (0.63, 2.54)     |
| No Religion                | 0.89 (0.46, 1.71)       | 0.91 (0.47, 1.78)     | 0.75 (0.56, 0.99)       | 1.05 (0.77, 1.43)     |
| <b>Parity</b>              |                         |                       |                         |                       |
| 0 (Reference)              | 1.00                    | 1.00                  | 1.00                    | 1.00                  |
| 1                          | 0.65 (0.49, 0.86)       | 0.83 (0.57, 1.21)     | 1.68 (1.42, 1.98)       | 0.86 (0.65, 1.13)     |
| 2                          | 0.43 (0.31, 0.59)       | 0.58 (0.34, 0.97)     | 2.58 (2.14, 3.12)       | 0.96 (0.71, 1.32)     |
| 3                          | 0.37 (0.26, 0.52)       | 0.48 (0.27, 0.85)     | 3.18 (2.66, 3.79)       | 1.04 (0.75, 1.45)     |
| 4                          | 0.42 (0.29, 0.63)       | 0.46 (0.24, 0.89)     | 3.01 (2.44, 3.71)       | 1.00 (0.70, 1.42)     |
| 5                          | 0.43 (0.25, 0.74)       | 0.45 (0.21, 0.95)     | 3.00 (2.28, 3.93)       | 1.11 (0.74, 1.66)     |
| 6+                         | 0.61 (0.39, 0.95)       | 0.55 (0.27, 1.12)     | 3.43 (2.73, 4.32)       | 1.37 (0.93, 2.01)     |
| <b>Marital Status</b>      |                         |                       |                         |                       |
| Single (Reference)         | 1.00                    | 1.00                  | 1.00                    | 1.00                  |
| Married                    | 0.42 (0.34, 0.53)       | 0.69 (0.48, 0.99)     | 2.88 (2.48, 3.33)       | 1.80 (1.38, 2.35)     |
| Formerly Married           | 0.68 (0.52, 0.90)       | 1.10 (0.72, 1.67)     | 2.95 (2.48, 3.52)       | 1.55 (1.14, 2.12)     |
| <b>Residential Setting</b> |                         |                       |                         |                       |
| Rural (Reference)          | 1.00                    | 1.00                  | 1.00                    | 1.00                  |
| Urban                      | 0.73 (0.58, 0.93)       | 1.78 (1.04, 3.07)     | 2.16 (1.88, 2.49)       | 0.93 (0.72, 1.21)     |
| <b>Region</b>              |                         |                       |                         |                       |
| Harare (Reference)         | 1.00                    | 1.00                  | 1.00                    | 1.00                  |
| Manicaland                 | 1.07 (0.68, 1.70)       | 0.81 (0.46, 1.41)     | 0.50 (0.39, 0.65)       | 0.88 (0.67, 1.17)     |
| Mashonaland Central        | 1.15 (0.70, 1.88)       | 0.88 (0.49, 1.58)     | 0.45 (0.35, 0.58)       | 0.87 (0.65, 1.16)     |
| Mashonaland East           | 2.69 (1.68, 4.31)       | 2.22 (1.29, 3.82)     | 0.61 (0.48, 0.78)       | 0.93 (0.71, 1.22)     |
| Mashonaland West           | 1.98 (1.25, 3.12)       | 1.64 (0.94, 2.85)     | 0.54 (0.43, 0.68)       | 0.83 (0.62, 1.12)     |
| Mashonaland North          | 2.85 (1.70, 4.76)       | 1.87 (1.01, 3.45)     | 0.48 (0.35, 0.65)       | 1.05 (0.77, 1.43)     |
| Mashonaland South          | 2.99 (1.86, 4.79)       | 2.07 (1.17, 3.63)     | 0.50 (0.39, 0.65)       | 0.93 (0.68, 1.26)     |
| Midlands                   | 1.84 (1.16, 2.94)       | 1.37 (0.76, 2.46)     | 0.54 (0.40, 0.72)       | 0.93 (0.67, 1.30)     |
| Masvingo                   | 0.94 (0.55, 1.61)       | 0.66 (0.36, 1.20)     | 0.51 (0.39, 0.66)       | 0.91 (0.69, 1.20)     |
| Bulawayo                   | 1.59 (0.99, 2.57)       | 1.44 (0.87, 2.38)     | 0.95 (0.76, 1.19)       | 1.07 (0.82, 1.39)     |
| <b>Level of Education</b>  |                         |                       |                         |                       |
| No Education (Reference)   | 1.00                    | 1.00                  | 1.00                    | 1.00                  |
| Primary                    | 1.03 (0.38, 2.82)       | 0.95 (0.35, 2.57)     | 0.77 (0.48, 1.25)       | 1.01 (0.57, 1.78)     |
| Secondary                  | 1.04 (0.39, 2.79)       | 0.91 (0.34, 2.42)     | 1.07 (0.67, 1.72)       | 1.15 (0.65, 2.04)     |
| Higher                     | 0.65 (0.22, 1.97)       | 0.99 (0.32, 3.08)     | 2.48 (1.51, 4.09)       | 1.29 (0.71, 2.36)     |

|                                   | UNDERWEIGHT       |                   | OVERWEIGHT/OBESITY |                   |
|-----------------------------------|-------------------|-------------------|--------------------|-------------------|
| <b>Wealth Quintile</b>            |                   |                   |                    |                   |
| Poorest (Reference)               | 1.00              | 1.00              | 1.00               | 1.00              |
| Poorer                            | 1.07 (0.79, 1.44) | 1.04 (0.78, 1.38) | 1.39 (1.12, 1.73)  | 1.44 (1.16, 1.80) |
| Middle                            | 1.10 (0.82, 1.47) | 0.94 (0.68, 1.28) | 1.87 (1.54, 2.28)  | 1.92 (1.55, 2.39) |
| Richer                            | 0.80 (0.58, 1.11) | 0.48 (0.29, 0.78) | 2.83 (2.30, 3.48)  | 2.89 (2.21, 3.78) |
| Richest                           | 0.56 (0.40, 0.78) | 0.26 (0.14, 0.48) | 3.94 (3.26, 4.76)  | 4.16 (3.02, 5.75) |
| <b>Occupation</b>                 |                   |                   |                    |                   |
| Not Working (Reference)           | 1.00              | 1.00              | 1.00               | 1.00              |
| Nonmanual                         | 0.58 (0.46, 0.74) | 0.75 (0.57, 1.00) | 2.16 (1.92, 2.44)  | 1.17 (1.02, 1.36) |
| Manual                            | 0.58 (0.30, 1.13) | 0.79 (0.39, 1.59) | 1.85 (1.37, 2.50)  | 0.89 (0.64, 1.24) |
| Agricultural                      | 0.59 (0.38, 0.91) | 0.76 (0.48, 1.21) | 1.24 (1.01, 1.52)  | 0.91 (0.73, 1.13) |
| Others                            | 1.28 (0.56, 2.97) | 1.62 (0.70, 3.72) | 2.24 (1.32, 3.80)  | 1.07 (0.62, 1.84) |
| <b>Media Exposure</b>             |                   |                   |                    |                   |
| Not Exposed (Reference)           | 1.00              | 1.00              | 1.00               | 1.00              |
| Exposed to one media source       | 0.89 (0.69, 1.17) | 1.01 (0.77, 1.32) | 1.18 (1.01, 1.37)  | 0.97 (0.83, 1.14) |
| Exposed to two media sources      | 0.85 (0.63, 1.15) | 1.03 (0.75, 1.41) | 1.70 (1.44, 2.00)  | 1.09 (0.91, 1.30) |
| Exposed to three media sources    | 0.61 (0.45, 0.84) | 0.87 (0.60, 1.26) | 2.45 (2.08, 2.89)  | 1.29 (1.06, 1.58) |
| <b>Hormonal Contraceptive Use</b> |                   |                   |                    |                   |
| No (Reference)                    | 1.00              | 1.00              | 1.00               | 1.00              |
| Yes                               | 0.53 (0.42, 0.65) | 0.87 (0.64, 1.18) | 1.49 (1.34, 1.67)  | 1.04 (0.90, 1.19) |

Overall Model Fit:  $F(86, 296) = 6.49, P=0.0000$ .



**Table S65:** Unadjusted and adjusted relative risk ratio, of underweight and overweight/obesity among women of child-bearing age in Gabon.

| VARIABLES                   | UNDERWEIGHT                |                          | OVERWEIGHT/OBESITY         |                          |
|-----------------------------|----------------------------|--------------------------|----------------------------|--------------------------|
|                             | Unadjusted<br>RRR (95% CI) | Adjusted<br>RRR (95% CI) | Unadjusted<br>RRR (95% CI) | Adjusted<br>RRR (95% CI) |
| <b>Age</b>                  |                            |                          |                            |                          |
| 15-19 (Reference)           | 1.00                       | 1.00                     | 1.00                       | 1.00                     |
| 20-24                       | 0.61 (0.37, 0.99)          | 0.77 (0.40, 1.46)        | 1.88 (1.26, 2.80)          | 1.83 (1.16, 2.89)        |
| 25-29                       | 0.40 (0.22, 0.73)          | 0.55 (0.22, 1.40)        | 3.43 (2.29, 5.14)          | 2.93 (1.77, 4.84)        |
| 30-34                       | 0.30 (0.14, 0.64)          | 0.41 (0.13, 1.23)        | 6.49 (4.20, 10.0)          | 5.42 (3.18, 9.23)        |
| 35-39                       | 0.38 (0.16, 0.91)          | 0.58 (0.15, 2.21)        | 7.25 (4.98, 10.5)          | 6.42 (3.96, 10.4)        |
| 40-44                       | 0.20 (0.09, 0.43)          | 0.32 (0.09, 1.22)        | 7.99 (5.04, 12.7)          | 7.02 (4.12, 12.0)        |
| 45-49                       | 0.24 (0.11, 0.51)          | 0.48 (0.13, 1.69)        | 9.04 (5.81, 14.0)          | 9.10 (5.03, 16.5)        |
| <b>Ethnicity</b>            |                            |                          |                            |                          |
| Shira-Punu/Vili (Reference) | 1.00                       | 1.00                     | 1.00                       | 1.00                     |
| Fang                        | 0.48 (0.28, 0.83)          | 0.46 (0.25, 0.84)        | 1.31 (0.90, 1.91)          | 1.37 (0.87, 2.17)        |
| Kota-Kele                   | 0.57 (0.31, 1.03)          | 0.51 (0.21, 1.23)        | 0.78 (0.51, 1.19)          | 0.98 (0.58, 1.64)        |
| Mbede-Teke                  | 0.67 (0.36, 1.26)          | 0.61 (0.26, 1.47)        | 1.12 (0.73, 1.71)          | 1.04 (0.62, 1.76)        |
| Myene                       | 1.20 (0.59, 2.44)          | 0.89 (0.39, 2.05)        | 1.68 (1.04, 2.73)          | 1.80 (1.05, 3.06)        |
| Nzabi-Duma                  | 1.06 (0.67, 1.68)          | 1.02 (0.66, 1.59)        | 1.07 (0.78, 1.47)          | 1.10 (0.77, 1.57)        |
| Okande-Tsogho               | 0.64 (0.36, 1.13)          | 0.65 (0.36, 1.17)        | 0.74 (0.45, 1.20)          | 1.29 (0.70, 2.36)        |
| Pygmee                      | 0.22 (0.04, 1.33)          | 0.28 (0.04, 1.86)        | 0.08 (0.03, 0.23)          | 0.10 (0.02, 0.52)        |
| Other                       | 0.43 (0.24, 0.80)          | 0.44 (0.23, 0.83)        | 0.88 (0.60, 1.30)          | 0.93 (0.57, 1.53)        |
| <b>Religion</b>             |                            |                          |                            |                          |
| Catholics (Reference)       | 1.00                       | 1.00                     | 1.00                       | 1.00                     |
| Other Christians            | 1.72 (1.18, 2.53)          | 1.53 (0.99, 2.35)        | 1.02 (0.82, 1.27)          | 1.19 (0.91, 1.54)        |
| Others                      | 1.08 (0.36, 3.27)          | 0.83 (0.25, 2.74)        | 1.05 (0.52, 2.14)          | 1.18 (0.54, 2.60)        |
| No Religion                 | 1.45 (0.74, 2.85)          | 1.39 (0.65, 2.99)        | 0.82 (0.56, 1.19)          | 1.39 (0.82, 2.34)        |
| <b>Parity</b>               |                            |                          |                            |                          |
| 0 (Reference)               | 1.00                       | 1.00                     | 1.00                       | 1.00                     |
| 1                           | 0.47 (0.30, 0.72)          | 0.75 (0.48, 1.15)        | 1.57 (1.05, 2.35)          | 0.89 (0.55, 1.44)        |
| 2                           | 0.40 (0.19, 0.84)          | 0.83 (0.34, 2.06)        | 3.54 (2.39, 5.24)          | 1.42 (0.84, 2.43)        |
| 3                           | 0.68 (0.31, 1.47)          | 1.80 (0.73, 4.45)        | 3.00 (1.88, 4.78)          | 0.89 (0.50, 1.59)        |
| 4                           | 0.25 (0.11, 0.57)          | 0.81 (0.27, 2.43)        | 3.55 (2.40, 5.25)          | 0.98 (0.57, 1.66)        |
| 5                           | 0.55 (0.25, 1.22)          | 1.71 (0.49, 6.00)        | 4.31 (2.75, 6.77)          | 1.12 (0.62, 2.03)        |
| 6+                          | 0.21 (0.12, 0.37)          | 0.82 (0.29, 2.37)        | 4.21 (2.80, 6.33)          | 1.13 (0.66, 1.92)        |
| <b>Marital Status</b>       |                            |                          |                            |                          |
| Single (Reference)          | 1.00                       | 1.00                     | 1.00                       | 1.00                     |
| Married                     | 0.38 (0.24, 0.59)          | 0.61 (0.35, 1.05)        | 2.72 (2.15, 3.44)          | 1.29 (0.96, 1.73)        |
| Formerly Married            | 0.44 (0.24, 0.79)          | 0.89 (0.46, 1.71)        | 4.13 (2.80, 6.09)          | 1.70 (1.07, 2.72)        |
| <b>Residential Setting</b>  |                            |                          |                            |                          |
| Rural (Reference)           | 1.00                       | 1.00                     | 1.00                       | 1.00                     |
| Urban                       | 1.13 (0.84, 1.52)          | 0.70 (0.48, 1.03)        | 1.49 (1.16, 1.89)          | 1.10 (0.80, 1.51)        |
| <b>Region</b>               |                            |                          |                            |                          |
| Estuaire (Reference)        | 1.00                       | 1.00                     | 1.00                       | 1.00                     |
| Libreville-Port-Gentil      | 1.42 (0.92, 2.20)          | 1.69 (1.01, 2.82)        | 1.23 (0.86, 1.76)          | 1.04 (0.69, 1.59)        |
| Haut-Ogooué                 | 1.28 (0.80, 2.07)          | 1.51 (0.73, 3.14)        | 0.89 (0.60, 1.31)          | 1.04 (0.62, 1.75)        |
| Moyen-Ogooué                | 2.02 (1.23, 3.32)          | 2.40 (1.26, 4.55)        | 0.97 (0.66, 1.44)          | 1.08 (0.71, 1.65)        |
| Ngounié                     | 1.19 (0.75, 1.87)          | 1.27 (0.76, 2.12)        | 0.46 (0.31, 0.70)          | 0.58 (0.35, 0.95)        |
| Nyanga                      | 0.93 (0.56, 1.53)          | 0.93 (0.53, 1.64)        | 0.66 (0.43, 1.01)          | 0.86 (0.50, 1.49)        |
| Ogooué Maritime             | 1.13 (0.62, 2.06)          | 1.09 (0.55, 2.14)        | 0.98 (0.64, 1.51)          | 0.88 (0.54, 1.44)        |
| Ogooué-Ivindo               | 1.08 (0.71, 1.66)          | 1.96 (1.01, 3.82)        | 0.56 (0.38, 0.83)          | 0.92 (0.58, 1.46)        |
| Ogooué-Lolo                 | 1.09 (0.64, 1.86)          | 1.37 (0.73, 2.56)        | 0.73 (0.47, 1.13)          | 0.99 (0.60, 1.63)        |
| Woleu-N'tem                 | 0.56 (0.22, 1.44)          | 1.05 (0.39, 2.84)        | 0.88 (0.62, 1.26)          | 0.92 (0.58, 1.44)        |

|                                   | UNDERWEIGHT       |                   | OVERWEIGHT/OBESITY |                   |
|-----------------------------------|-------------------|-------------------|--------------------|-------------------|
| <b>Level of Education</b>         |                   |                   |                    |                   |
| No Education (Reference)          | 1.00              | 1.00              | 1.00               | 1.00              |
| Primary                           | 4.23 (1.01, 17.8) | 3.57 (0.77, 16.6) | 2.95 (1.46, 5.95)  | 2.89 (1.47, 5.68) |
| Secondary                         | 8.31 (2.01, 34.4) | 5.22 (1.15, 23.7) | 2.96 (1.55, 5.63)  | 3.39 (1.74, 6.63) |
| Higher                            | 4.06 (0.83, 20.0) | 3.04 (0.56, 16.5) | 3.85 (1.75, 8.47)  | 2.48 (1.10, 5.61) |
| <b>Wealth Quintile</b>            |                   |                   |                    |                   |
| Poorest (Reference)               | 1.00              | 1.00              | 1.00               | 1.00              |
| Poorer                            | 0.95 (0.61, 1.48) | 0.73 (0.45, 1.19) | 1.33 (1.01, 1.77)  | 1.35 (0.91, 1.99) |
| Middle                            | 1.26 (0.80, 2.00) | 1.00 (0.58, 1.75) | 1.85 (1.43, 2.39)  | 1.85 (1.19, 2.87) |
| Richer                            | 0.98 (0.61, 1.58) | 0.66 (0.37, 1.17) | 1.93 (1.41, 2.64)  | 1.96 (1.21, 3.17) |
| Richest                           | 1.65 (1.01, 2.69) | 1.22 (0.70, 2.12) | 2.45 (1.75, 3.41)  | 2.57 (1.59, 4.15) |
| <b>Occupation</b>                 |                   |                   |                    |                   |
| Not Working (Reference)           | 1.00              | 1.00              | 1.00               | 1.00              |
| Nonmanual                         | 0.45 (0.27, 0.75) | 0.67 (0.39, 1.17) | 2.16 (1.71, 2.73)  | 1.01 (0.78, 1.32) |
| Manual                            | 0.56 (0.16, 1.87) | 0.71 (0.20, 2.58) | 3.40 (1.97, 5.85)  | 1.82 (1.04, 3.18) |
| Agricultural                      | 0.55 (0.34, 0.88) | 1.01 (0.61, 1.69) | 1.13 (0.73, 1.74)  | 0.93 (0.58, 1.48) |
| <b>Media Exposure</b>             |                   |                   |                    |                   |
| Not Exposed (Reference)           | 1.00              | 1.00              | 1.00               | 1.00              |
| Exposed to one media source       | 1.62 (0.96, 2.73) | 1.51 (0.83, 2.73) | 1.35 (0.83, 2.21)  | 0.98 (0.55, 1.75) |
| Exposed to two media sources      | 1.33 (0.79, 2.23) | 1.24 (0.67, 2.28) | 1.58 (0.97, 2.57)  | 0.91 (0.52, 1.61) |
| Exposed to three media sources    | 1.67 (1.01, 2.77) | 1.49 (0.75, 2.95) | 1.60 (1.02, 2.51)  | 0.77 (0.42, 1.40) |
| <b>Hormonal Contraceptive Use</b> |                   |                   |                    |                   |
| No (Reference)                    | 1.00              | 1.00              | 1.00               | 1.00              |
| Yes                               | 1.28 (0.46, 3.60) | 1.77 (0.67, 4.72) | 1.85 (0.97, 3.56)  | 1.45 (0.70, 2.99) |

Overall Model Fit:  $F(98, 218) = 13.70, P=0.0000$ .

**Table S66:** Unadjusted and adjusted relative risk ratio, of underweight and overweight/obesity among women of child-bearing age in Ghana.

| VARIABLES                  | UNDERWEIGHT             |                       | OVERWEIGHT/OBESITY      |                       |
|----------------------------|-------------------------|-----------------------|-------------------------|-----------------------|
|                            | Unadjusted RRR (95% CI) | Adjusted RRR (95% CI) | Unadjusted RRR (95% CI) | Adjusted RRR (95% CI) |
| <b>Age</b>                 |                         |                       |                         |                       |
| 15-19 (Reference)          | 1.00                    | 1.00                  | 1.00                    | 1.00                  |
| 20-24                      | 0.47 (0.29, 0.76)       | 0.67 (0.41, 1.10)     | 3.63 (2.55, 5.18)       | 3.04 (2.01, 4.60)     |
| 25-29                      | 0.56 (0.34, 0.91)       | 1.03 (0.57, 1.84)     | 7.91 (5.62, 11.1)       | 5.51 (3.53, 8.61)     |
| 30-34                      | 0.58 (0.35, 0.96)       | 1.04 (0.49, 2.20)     | 11.1 (7.71, 16.1)       | 8.56 (5.19, 14.1)     |
| 35-39                      | 0.57 (0.34, 0.97)       | 1.06 (0.44, 2.52)     | 11.1 (7.76, 15.8)       | 9.00 (5.33, 15.2)     |
| 40-44                      | 0.31 (0.16, 0.64)       | 0.54 (0.19, 1.56)     | 13.6 (9.39, 19.8)       | 12.0 (7.02, 20.6)     |
| 45-49                      | 0.42 (0.24, 0.75)       | 0.65 (0.26, 1.58)     | 10.7 (7.27, 15.6)       | 10.2 (5.92, 17.4)     |
| <b>Ethnicity</b>           |                         |                       |                         |                       |
| Akan (Reference)           | 1.00                    | 1.00                  | 1.00                    | 1.00                  |
| Ga/Dangme                  | 0.91 (0.48, 1.73)       | 0.74 (0.36, 1.52)     | 1.11 (0.83, 1.50)       | 1.00 (0.65, 1.53)     |
| Ewe                        | 0.89 (0.53, 1.47)       | 0.59 (0.30, 1.18)     | 0.72 (0.53, 0.98)       | 0.79 (0.56, 1.11)     |
| Guan                       | 0.77 (0.38, 1.56)       | 0.51 (0.24, 1.09)     | 0.86 (0.58, 1.25)       | 1.00 (0.66, 1.50)     |
| Mole-Dagbani               | 1.12 (0.79, 1.58)       | 0.68 (0.34, 1.36)     | 0.36 (0.26, 0.49)       | 0.71 (0.49, 1.02)     |
| Grusi                      | 0.57 (0.30, 1.07)       | 0.39 (0.19, 0.80)     | 0.38 (0.24, 0.62)       | 0.79 (0.51, 1.22)     |
| Gurma                      | 1.11 (0.74, 1.67)       | 0.57 (0.27, 1.18)     | 0.21 (0.13, 0.33)       | 0.78 (0.45, 1.36)     |
| Mande                      | 0.35 (0.07, 1.77)       | 0.14 (0.02, 0.89)     | 0.67 (0.28, 1.60)       | 1.27 (0.42, 3.85)     |
| Others                     | 3.03 (1.34, 6.83)       | 2.08 (0.91, 4.77)     | 1.49 (0.85, 2.61)       | 1.54 (0.75, 3.16)     |
| <b>Religion</b>            |                         |                       |                         |                       |
| Catholics (Reference)      | 1.00                    | 1.00                  | 1.00                    | 1.00                  |
| Other Christians           | 1.09 (0.69, 1.74)       | 1.14 (0.68, 1.90)     | 1.31 (1.01, 1.70)       | 0.86 (0.64, 1.15)     |
| Islam                      | 1.44 (0.86, 2.39)       | 1.51 (0.85, 2.69)     | 0.97 (0.66, 1.43)       | 1.38 (0.91, 2.08)     |
| Traditionalist             | 1.76 (0.78, 3.95)       | 1.52 (0.67, 3.46)     | 0.61 (0.32, 1.16)       | 1.69 (0.88, 3.21)     |
| No Religion                | 0.33 (0.10, 1.12)       | 0.37 (0.11, 1.30)     | 0.65 (0.39, 1.07)       | 0.78 (0.42, 1.42)     |
| <b>Parity</b>              |                         |                       |                         |                       |
| 0 (Reference)              | 1.00                    | 1.00                  | 1.00                    | 1.00                  |
| 1                          | 0.42 (0.25, 0.72)       | 0.60 (0.34, 1.05)     | 2.09 (1.59, 2.74)       | 0.94 (0.65, 1.36)     |
| 2                          | 0.71 (0.40, 1.27)       | 1.03 (0.50, 2.11)     | 3.87 (2.94, 5.10)       | 1.34 (0.90, 1.99)     |
| 3                          | 0.51 (0.29, 0.90)       | 0.72 (0.36, 1.45)     | 3.65 (2.80, 4.75)       | 1.22 (0.80, 1.86)     |
| 4                          | 0.66 (0.38, 1.17)       | 0.92 (0.42, 1.98)     | 3.25 (2.37, 4.46)       | 0.98 (0.60, 1.60)     |
| 5                          | 0.29 (0.13, 0.67)       | 0.39 (0.12, 1.20)     | 2.21 (1.57, 3.11)       | 0.83 (0.51, 1.36)     |
| 6+                         | 0.59 (0.38, 0.94)       | 0.85 (0.36, 2.02)     | 2.23 (1.67, 2.96)       | 1.30 (0.78, 2.16)     |
| <b>Marital Status</b>      |                         |                       |                         |                       |
| Single (Reference)         | 1.00                    | 1.00                  | 1.00                    | 1.00                  |
| Married                    | 0.54 (0.39, 0.75)       | 0.83 (0.50, 1.37)     | 3.14 (2.58, 3.81)       | 1.48 (1.06, 2.06)     |
| Formerly Married           | 0.75 (0.42, 1.33)       | 1.26 (0.59, 2.68)     | 4.55 (3.47, 5.96)       | 1.74 (1.14, 2.66)     |
| <b>Residential Setting</b> |                         |                       |                         |                       |
| Rural (Reference)          | 1.00                    | 1.00                  | 1.00                    | 1.00                  |
| Urban                      | 0.96 (0.72, 1.28)       | 1.12 (0.76, 1.66)     | 2.30 (1.91, 2.78)       | 0.71 (0.55, 0.92)     |
| <b>Region</b>              |                         |                       |                         |                       |
| Greater Accra (Reference)  | 1.00                    | 1.00                  | 1.00                    | 1.00                  |
| Western                    | 0.83 (0.45, 1.52)       | 0.72 (0.35, 1.48)     | 0.55 (0.42, 0.72)       | 0.81 (0.59, 1.12)     |
| Central                    | 0.55 (0.27, 1.12)       | 0.47 (0.21, 1.06)     | 0.50 (0.38, 0.66)       | 0.73 (0.51, 1.03)     |
| Volta                      | 1.01 (0.50, 2.06)       | 1.18 (0.50, 2.78)     | 0.35 (0.23, 0.51)       | 0.79 (0.51, 1.23)     |
| Eastern                    | 1.04 (0.56, 1.94)       | 0.93 (0.44, 1.93)     | 0.47 (0.35, 0.62)       | 0.72 (0.49, 1.04)     |
| Ashanti                    | 1.01 (0.54, 1.86)       | 0.81 (0.38, 1.73)     | 0.59 (0.44, 0.79)       | 0.77 (0.54, 1.10)     |
| Brong Ahafo                | 0.92 (0.51, 1.67)       | 0.72 (0.33, 1.59)     | 0.39 (0.27, 0.55)       | 0.85 (0.57, 1.27)     |
| Northern                   | 1.24 (0.74, 2.07)       | 1.04 (0.47, 2.32)     | 0.11 (0.08, 0.18)       | 0.41 (0.22, 0.75)     |
| Upper East                 | 1.12 (0.66, 1.89)       | 0.94 (0.40, 2.20)     | 0.18 (0.12, 0.26)       | 0.73 (0.45, 1.19)     |
| Upper West                 | 0.82 (0.46, 1.46)       | 0.73 (0.31, 1.75)     | 0.19 (0.13, 0.27)       | 0.71 (0.41, 1.24)     |

|                                   | UNDERWEIGHT       |                   | OVERWEIGHT/OBESITY |                   |
|-----------------------------------|-------------------|-------------------|--------------------|-------------------|
| <b>Level of Education</b>         |                   |                   |                    |                   |
| No Education (Reference)          | 1.00              | 1.00              | 1.00               | 1.00              |
| Primary                           | 1.52 (1.04, 2.23) | 1.67 (1.06, 2.64) | 1.70 (1.33, 2.17)  | 1.44 (1.10, 1.88) |
| Secondary                         | 1.22 (0.90, 1.66) | 1.26 (0.81, 1.96) | 2.06 (1.67, 2.54)  | 1.45 (1.11, 1.89) |
| Higher                            | 1.36 (0.62, 3.02) | 1.93 (0.74, 5.06) | 3.91 (2.70, 5.66)  | 1.38 (0.82, 2.31) |
| <b>Wealth Quintile</b>            |                   |                   |                    |                   |
| Poorest (Reference)               | 1.00              | 1.00              | 1.00               | 1.00              |
| Poorer                            | 0.84 (0.57, 1.23) | 0.89 (0.57, 1.40) | 2.42 (1.84, 3.20)  | 1.65 (1.20, 2.26) |
| Middle                            | 0.57 (0.38, 0.85) | 0.62 (0.34, 1.15) | 4.50 (3.40, 5.95)  | 2.73 (1.90, 3.93) |
| Richer                            | 0.79 (0.51, 1.23) | 0.76 (0.38, 1.51) | 7.89 (5.88, 10.6)  | 4.41 (2.87, 6.75) |
| Richest                           | 0.74 (0.47, 1.16) | 0.55 (0.25, 1.23) | 10.7 (8.15, 14.1)  | 6.47 (4.00, 10.5) |
| <b>Occupation</b>                 |                   |                   |                    |                   |
| Not Working (Reference)           | 1.00              | 1.00              | 1.00               | 1.00              |
| Nonmanual                         | 0.51 (0.34, 0.78) | 0.62 (0.38, 1.02) | 3.70 (2.97, 4.60)  | 1.24 (0.96, 1.60) |
| Manual                            | 0.42 (0.24, 0.74) | 0.55 (0.29, 1.03) | 2.50 (1.88, 3.32)  | 1.14 (0.83, 1.57) |
| Agricultural                      | 0.74 (0.52, 1.06) | 1.07 (0.64, 1.78) | 0.79 (0.61, 1.03)  | 0.57 (0.39, 0.81) |
| <b>Media Exposure</b>             |                   |                   |                    |                   |
| Not Exposed (Reference)           | 1.00              | 1.00              | 1.00               | 1.00              |
| Exposed to one media source       | 0.86 (0.55, 1.33) | 0.89 (0.55, 1.46) | 2.49 (1.75, 3.53)  | 1.75 (1.16, 2.65) |
| Exposed to two media sources      | 0.73 (0.46, 1.16) | 0.79 (0.45, 1.40) | 4.42 (3.14, 6.22)  | 1.88 (1.24, 2.87) |
| Exposed to three media sources    | 0.84 (0.50, 1.41) | 0.78 (0.39, 1.56) | 4.89 (3.26, 7.34)  | 2.09 (1.25, 3.48) |
| <b>Hormonal Contraceptive Use</b> |                   |                   |                    |                   |
| No (Reference)                    | 1.00              | 1.00              | 1.00               | 1.00              |
| Yes                               | 0.36 (0.21, 0.61) | 0.44 (0.25, 0.76) | 0.96 (0.78, 1.19)  | 0.85 (0.65, 1.11) |

Overall Model Fit:  $F(100, 308) = 9.39, P=0.0000$ .

**Table S67:** Unadjusted and adjusted relative risk ratio, of underweight and overweight/obesity among women of child-bearing age in Lesotho.

| VARIABLES                  | UNDERWEIGHT                |                          | OVERWEIGHT/OBESITY         |                          |
|----------------------------|----------------------------|--------------------------|----------------------------|--------------------------|
|                            | Unadjusted<br>RRR (95% CI) | Adjusted<br>RRR (95% CI) | Unadjusted<br>RRR (95% CI) | Adjusted<br>RRR (95% CI) |
| <b>Age</b>                 |                            |                          |                            |                          |
| 15-19 (Reference)          | 1.00                       | 1.00                     | 1.00                       | 1.00                     |
| 20-24                      | 0.85 (0.50, 1.45)          | 1.29 (0.72, 2.28)        | 2.12 (1.54, 2.90)          | 1.61 (1.10, 2.37)        |
| 25-29                      | 0.33 (0.16, 0.69)          | 0.63 (0.28, 1.44)        | 4.28 (3.02, 6.05)          | 2.96 (1.90, 4.60)        |
| 30-34                      | 0.55 (0.26, 1.16)          | 1.33 (0.56, 3.14)        | 4.73 (3.41, 6.57)          | 3.12 (2.04, 4.77)        |
| 35-39                      | 0.18 (0.05, 0.58)          | 0.42 (0.11, 1.64)        | 6.48 (4.52, 9.28)          | 4.32 (2.61, 7.16)        |
| 40-44                      | 0.37 (0.14, 0.99)          | 0.91 (0.34, 2.43)        | 8.09 (5.91, 11.1)          | 5.93 (3.72, 9.46)        |
| 45-49                      | 0.37 (0.16, 0.89)          | 0.92 (0.27, 3.12)        | 8.75 (5.73, 13.4)          | 6.99 (3.94, 12.4)        |
| <b>Religion</b>            |                            |                          |                            |                          |
| Catholics (Reference)      | 1.00                       | 1.00                     | 1.00                       | 1.00                     |
| Other Christians           | 0.70 (0.47, 1.04)          | 0.72 (0.48, 1.10)        | 0.96 (0.79, 1.16)          | 0.91 (0.74, 1.13)        |
| Others                     | 0.28 (0.04, 2.17)          | 0.29 (0.04, 1.91)        | 0.73 (0.40, 1.35)          | 0.78 (0.36, 1.68)        |
| <b>Parity</b>              |                            |                          |                            |                          |
| 0 (Reference)              | 1.00                       | 1.00                     | 1.00                       | 1.00                     |
| 1                          | 0.61 (0.37, 1.00)          | 0.71 (0.36, 1.38)        | 2.26 (1.73, 2.95)          | 1.14 (0.79, 1.65)        |
| 2                          | 0.34 (0.16, 0.72)          | 0.43 (0.15, 1.22)        | 3.45 (2.60, 4.58)          | 1.33 (0.84, 2.09)        |
| 3                          | 0.16 (0.05, 0.54)          | 0.20 (0.05, 0.81)        | 3.55 (2.60, 4.84)          | 1.23 (0.74, 2.02)        |
| 4                          | 0.43 (0.18, 1.01)          | 0.59 (0.17, 2.11)        | 4.90 (3.26, 7.36)          | 1.47 (0.84, 2.56)        |
| 5                          | 0.22 (0.05, 0.98)          | 0.27 (0.04, 1.72)        | 4.59 (2.82, 7.46)          | 1.56 (0.84, 2.88)        |
| 6+                         | 0.34 (0.10, 1.11)          | 0.42 (0.09, 1.90)        | 3.42 (2.29, 5.09)          | 1.11 (0.60, 2.07)        |
| <b>Marital Status</b>      |                            |                          |                            |                          |
| Single (Reference)         | 1.00                       | 1.00                     | 1.00                       | 1.00                     |
| Married                    | 0.46 (0.29, 0.72)          | 0.80 (0.41, 1.55)        | 3.11 (2.51, 3.86)          | 1.50 (1.08, 2.08)        |
| Formerly Married           | 0.33 (0.15, 0.73)          | 0.64 (0.24, 1.73)        | 2.71 (2.03, 3.60)          | 1.03 (0.70, 1.51)        |
| <b>Residential Setting</b> |                            |                          |                            |                          |
| Rural (Reference)          | 1.00                       | 1.00                     | 1.00                       | 1.00                     |
| Urban                      | 1.15 (0.75, 1.78)          | 1.27 (0.70, 2.31)        | 1.42 (1.14, 1.77)          | 0.92 (0.70, 1.20)        |
| <b>Region</b>              |                            |                          |                            |                          |
| Maseru (Reference)         | 1.00                       | 1.00                     | 1.00                       | 1.00                     |
| Botha-Bothe                | 0.58 (0.25, 1.33)          | 0.65 (0.27, 1.55)        | 0.97 (0.69, 1.36)          | 1.33 (0.91, 1.95)        |
| Leribe                     | 0.75 (0.35, 1.63)          | 0.83 (0.39, 1.78)        | 1.03 (0.73, 1.45)          | 1.14 (0.79, 1.65)        |
| Berea                      | 1.46 (0.72, 2.93)          | 1.48 (0.72, 3.04)        | 1.09 (0.80, 1.49)          | 1.04 (0.74, 1.47)        |
| Mafeteng                   | 1.42 (0.69, 2.92)          | 1.56 (0.78, 3.10)        | 1.10 (0.76, 1.60)          | 1.18 (0.80, 1.73)        |
| Mohale's Hoek              | 0.75 (0.35, 1.62)          | 0.79 (0.35, 1.75)        | 0.95 (0.67, 1.34)          | 1.29 (0.92, 1.79)        |
| Quthing                    | 1.15 (0.58, 2.28)          | 1.24 (0.61, 2.50)        | 0.90 (0.60, 1.35)          | 1.19 (0.82, 1.74)        |
| Qacha's-Nek                | 1.11 (0.56, 2.20)          | 1.06 (0.52, 2.19)        | 0.91 (0.62, 1.33)          | 1.28 (0.86, 1.92)        |
| Mokhotlong                 | 0.81 (0.36, 1.83)          | 0.75 (0.31, 1.81)        | 0.44 (0.31, 0.62)          | 0.74 (0.51, 1.08)        |
| Thaba Tseka                | 1.12 (0.57, 2.20)          | 1.25 (0.61, 2.56)        | 0.54 (0.36, 0.81)          | 0.79 (0.53, 1.20)        |
| <b>Level of Education</b>  |                            |                          |                            |                          |
| No Education (Reference)   | 1.00                       | 1.00                     | 1.00                       | 1.00                     |
| Primary                    | 1.87 (0.36, 9.76)          | 1.00 (0.20, 4.99)        | 1.27 (0.52, 3.08)          | 1.35 (0.55, 3.31)        |
| Secondary                  | 1.85 (0.35, 9.70)          | 0.67 (0.12, 3.63)        | 1.33 (0.53, 3.33)          | 1.76 (0.70, 4.43)        |
| Higher                     | 1.68 (0.26, 10.8)          | 0.63 (0.09, 4.19)        | 2.31 (0.90, 5.92)          | 1.78 (0.69, 4.61)        |
| <b>Wealth Quintile</b>     |                            |                          |                            |                          |
| Poorest (Reference)        | 1.00                       | 1.00                     | 1.00                       | 1.00                     |
| Poorer                     | 0.99 (0.52, 1.87)          | 0.94 (0.45, 1.96)        | 1.88 (1.38, 2.55)          | 1.80 (1.31, 2.47)        |
| Middle                     | 0.82 (0.45, 1.51)          | 0.73 (0.35, 1.50)        | 2.32 (1.75, 3.06)          | 2.16 (1.55, 3.00)        |
| Richer                     | 0.76 (0.41, 1.40)          | 0.58 (0.26, 1.29)        | 2.87 (2.14, 3.86)          | 2.76 (1.92, 3.97)        |
| Richest                    | 1.09 (0.58, 2.03)          | 0.65 (0.23, 1.86)        | 3.75 (2.84, 4.96)          | 3.65 (2.42, 5.51)        |

|                                   | UNDERWEIGHT       |                   | OVERWEIGHT/OBESITY |                   |
|-----------------------------------|-------------------|-------------------|--------------------|-------------------|
| <b>Media Exposure</b>             |                   |                   |                    |                   |
| Not Exposed (Reference)           | 1.00              | 1.00              | 1.00               | 1.00              |
| Exposed to one media source       | 0.75 (0.46, 1.22) | 0.82 (0.48, 1.41) | 1.54 (1.20, 1.97)  | 1.02 (0.76, 1.36) |
| Exposed to two media sources      | 1.07 (0.64, 1.78) | 1.16 (0.63, 2.13) | 2.01 (1.54, 2.61)  | 1.10 (0.79, 1.52) |
| Exposed to three media sources    | 1.10 (0.61, 1.98) | 1.07 (0.49, 2.35) | 1.99 (1.51, 2.61)  | 1.13 (0.77, 1.64) |
| <b>Hormonal Contraceptive Use</b> |                   |                   |                    |                   |
| No (Reference)                    | 1.00              | 1.00              | 1.00               | 1.00              |
| Yes                               | 0.53 (0.31, 0.91) | 0.85 (0.45, 1.58) | 1.59 (1.32, 1.92)  | 1.21 (0.97, 1.50) |

Overall Model Fit:  $F(74, 306) = 6.81, P=0.0000$ .

**Table S68:** Unadjusted and adjusted relative risk ratio, of underweight and overweight/obesity among women of child-bearing age in Eswatini.

| VARIABLES                  | UNDERWEIGHT             |                       | OVERWEIGHT/OBESITY      |                       |
|----------------------------|-------------------------|-----------------------|-------------------------|-----------------------|
|                            | Unadjusted RRR (95% CI) | Adjusted RRR (95% CI) | Unadjusted RRR (95% CI) | Adjusted RRR (95% CI) |
| <b>Age</b>                 |                         |                       |                         |                       |
| 15-19 (Reference)          | 1.00                    | 1.00                  | 1.00                    | 1.00                  |
| 20-24                      | 0.54 (0.32, 0.92)       | 0.82 (0.44, 1.53)     | 1.99 (1.62, 2.46)       | 1.46 (1.13, 1.90)     |
| 25-29                      | 0.36 (0.16, 0.79)       | 0.80 (0.27, 2.33)     | 3.38 (2.74, 4.18)       | 2.06 (1.54, 2.75)     |
| 30-34                      | 0.29 (0.12, 0.71)       | 0.77 (0.25, 2.38)     | 5.68 (4.53, 7.11)       | 3.10 (2.18, 4.40)     |
| 35-39                      | 0.70 (0.30, 1.66)       | 2.05 (0.68, 6.23)     | 7.99 (6.28, 10.2)       | 4.39 (3.08, 6.26)     |
| 40-44                      | 0.48 (0.18, 1.28)       | 1.54 (0.40, 6.00)     | 10.6 (7.88, 14.3)       | 5.81 (3.68, 9.17)     |
| 45-49                      | 0.50 (0.20, 1.28)       | 1.42 (0.47, 4.32)     | 8.20 (6.25, 10.7)       | 4.89 (3.29, 7.26)     |
| <b>Religion</b>            |                         |                       |                         |                       |
| Catholics (Reference)      | 1.00                    | 1.00                  | 1.00                    | 1.00                  |
| Other Christians           | 0.59 (0.28, 1.23)       | 0.59 (0.28, 1.26)     | 1.10 (0.79, 1.53)       | 1.38 (0.99, 1.92)     |
| Traditionalists            | 0.80 (0.09, 7.47)       | 0.74 (0.07, 8.35)     | 0.63 (0.28, 1.41)       | 0.73 (0.34, 1.58)     |
| No Religion                | 0.66 (0.20, 2.17)       | 0.67 (0.20, 2.30)     | 1.01 (0.62, 1.63)       | 1.07 (0.67, 1.70)     |
| <b>Parity</b>              |                         |                       |                         |                       |
| 0 (Reference)              | 1.00                    | 1.00                  | 1.00                    | 1.00                  |
| 1                          | 0.67 (0.40, 1.10)       | 0.98 (0.55, 1.74)     | 2.22 (1.83, 2.70)       | 1.53 (1.20, 1.94)     |
| 2                          | 0.35 (0.17, 0.71)       | 0.59 (0.26, 1.35)     | 3.07 (2.49, 3.79)       | 1.62 (1.24, 2.12)     |
| 3                          | 0.67 (0.33, 1.34)       | 1.12 (0.44, 2.82)     | 4.28 (3.32, 5.51)       | 1.79 (1.27, 2.53)     |
| 4                          | 0.33 (0.09, 1.29)       | 0.48 (0.12, 1.96)     | 5.64 (4.28, 7.43)       | 2.19 (1.49, 3.21)     |
| 5                          | 0.17 (0.02, 1.22)       | 0.21 (0.03, 1.76)     | 6.72 (4.84, 9.34)       | 2.35 (1.56, 3.55)     |
| 6+                         | 0.37 (0.15, 0.92)       | 0.37 (0.10, 1.38)     | 6.66 (5.41, 8.19)       | 2.40 (1.66, 3.48)     |
| <b>Marital Status</b>      |                         |                       |                         |                       |
| Single (Reference)         | 1.00                    | 1.00                  | 1.00                    | 1.00                  |
| Married                    | 0.30 (0.17, 0.54)       | 0.41 (0.21, 0.78)     | 2.85 (2.47, 3.28)       | 1.08 (0.88, 1.31)     |
| Formerly Married           | 0.92 (0.45, 1.91)       | 1.14 (0.48, 2.71)     | 3.20 (2.60, 3.95)       | 0.99 (0.77, 1.28)     |
| <b>Residential Setting</b> |                         |                       |                         |                       |
| Rural (Reference)          | 1.00                    | 1.00                  | 1.00                    | 1.00                  |
| Urban                      | 1.10 (0.74, 1.64)       | 1.49 (0.88, 2.54)     | 1.30 (1.11, 1.52)       | 0.85 (0.70, 1.05)     |
| <b>Region</b>              |                         |                       |                         |                       |
| Hhohho (Reference)         | 1.00                    | 1.00                  | 1.00                    | 1.00                  |
| Manzini                    | 1.82 (1.00, 3.31)       | 1.59 (0.86, 2.95)     | 1.02 (0.85, 1.21)       | 1.10 (0.90, 1.34)     |
| Shiselweni                 | 1.76 (0.96, 3.22)       | 1.52 (0.80, 2.88)     | 0.93 (0.78, 1.11)       | 1.19 (0.99, 1.44)     |
| Lubombo                    | 1.75 (0.94, 3.28)       | 1.59 (0.87, 2.93)     | 0.88 (0.72, 1.07)       | 1.01 (0.81, 1.27)     |
| <b>Level of Education</b>  |                         |                       |                         |                       |
| No Education (Reference)   | 1.00                    | 1.00                  | 1.00                    | 1.00                  |
| Primary                    | 1.15 (0.56, 2.36)       | 0.76 (0.36, 1.62)     | 0.81 (0.62, 1.05)       | 1.18 (0.86, 1.62)     |
| Secondary                  | 0.94 (0.47, 1.87)       | 0.57 (0.26, 1.27)     | 0.88 (0.70, 1.11)       | 1.36 (1.00, 1.86)     |
| Higher                     | 0.44 (0.14, 1.44)       | 0.38 (0.11, 1.40)     | 1.64 (1.19, 2.26)       | 1.11 (0.72, 1.72)     |
| <b>Wealth Quintile</b>     |                         |                       |                         |                       |
| Poorest (Reference)        | 1.00                    | 1.00                  | 1.00                    | 1.00                  |
| Poorer                     | 0.94 (0.57, 1.55)       | 0.88 (0.53, 1.48)     | 1.25 (1.00, 1.57)       | 1.28 (0.97, 1.68)     |
| Middle                     | 0.70 (0.40, 1.24)       | 0.67 (0.36, 1.26)     | 1.40 (1.10, 1.79)       | 1.52 (1.11, 2.07)     |
| Richer                     | 0.78 (0.48, 1.27)       | 0.66 (0.35, 1.24)     | 1.74 (1.38, 2.19)       | 2.02 (1.47, 2.77)     |
| Richest                    | 0.73 (0.44, 1.22)       | 0.63 (0.28, 1.45)     | 2.23 (1.76, 2.82)       | 2.55 (1.79, 3.63)     |
| <b>Occupation</b>          |                         |                       |                         |                       |
| Not Working (Reference)    | 1.00                    | 1.00                  | 1.00                    | 1.00                  |
| Nonmanual                  | 0.40 (0.24, 0.67)       | 0.49 (0.29, 0.83)     | 2.46 (2.15, 2.82)       | 1.23 (1.03, 1.47)     |
| Manual                     | 0.84 (0.34, 2.06)       | 0.90 (0.33, 2.43)     | 2.33 (1.75, 3.11)       | 1.21 (0.91, 1.60)     |
| Agricultural               | 0.11 (0.02, 0.48)       | 0.10 (0.02, 0.48)     | 1.78 (1.30, 2.43)       | 1.00 (0.73, 1.36)     |

|                                   | UNDERWEIGHT       |                   | OVERWEIGHT/OBESITY |                   |
|-----------------------------------|-------------------|-------------------|--------------------|-------------------|
| <b>Media Exposure</b>             |                   |                   |                    |                   |
| Not Exposed (Reference)           | 1.00              | 1.00              | 1.00               | 1.00              |
| Exposed to one media source       | 1.30 (0.71, 2.39) | 1.29 (0.67, 2.46) | 0.99 (0.77, 1.27)  | 1.07 (0.80, 1.43) |
| Exposed to two media sources      | 0.97 (0.51, 1.83) | 0.93 (0.45, 1.92) | 1.07 (0.85, 1.34)  | 1.16 (0.85, 1.57) |
| Exposed to three media sources    | 1.11 (0.60, 2.03) | 1.21 (0.54, 2.67) | 1.35 (1.06, 1.71)  | 1.30 (0.91, 1.86) |
| <b>Hormonal Contraceptive Use</b> |                   |                   |                    |                   |
| No (Reference)                    | 1.00              | 1.00              | 1.00               | 1.00              |
| Yes                               | 0.43 (0.22, 0.86) | 0.72 (0.35, 1.47) | 1.46 (1.22, 1.74)  | 1.14 (0.94, 1.38) |

Overall Model Fit:  $F(70, 70) = 13.75, P=0.0000$ .
